# Supplementary material for: Comparison of dietary macronutrient patterns of 14 popular named dietary programmes for weight and cardiovascular risk factor reduction in adults: systematic review and network meta-analysis of randomised trials
Source: PubMed Central journal article supplement — BMJ. 2020 Apr 1;369:m696. doi: 10.1136/bmj.m696 (PMC7190064; doi:10.1136/bmj.m696), 2020-04-01
Supplement: gel049446.ww.pdf [file gel049446.ww.pdf]

**Comparison of dietary macronutrient patterns based on 14 popular named dietary programmes for weight and cardiovascular risk factor reduction in adults: A systematic review and network meta-analysis of randomized trials**

Long Ge, Behnam Sadeghirad, Geoff D.C. Ball, Bruno R. da Costa, Christine L. Hitchcock, Anton Svendrovski, Ruhi Kiflen, Kalimullah Quadri, Henry Y. Kwon, Mohammad Karamouzian, Thomasin Adams-Webber, Waleed Ahmed, Samah Damanhoury, Dena Zeraatkar, Adriani Nikolakopoulou, Ross T. Tsuyuki, Jinhui Tian, Kehu Yang, Gordon H. Guyatt, Bradley C. Johnston

## Content

|                                                                                                                                                                                                                                             |    |
|---------------------------------------------------------------------------------------------------------------------------------------------------------------------------------------------------------------------------------------------|----|
| <b>Text S1: Search strategies</b> .....                                                                                                                                                                                                     | 6  |
| <b>Text S2: Details on the missing SDs imputation for each outcome</b> .....                                                                                                                                                                | 16 |
| <b>Text S3: Instructions for GRADE assessment</b> .....                                                                                                                                                                                     | 19 |
| <b>Text S4: The list of eligible studies</b> .....                                                                                                                                                                                          | 22 |
| <b>Table S1: The characteristics of eligible dietary program study interventions</b> .....                                                                                                                                                  | 33 |
| <b>Table S2 Characteristics of included studies</b> .....                                                                                                                                                                                   | 36 |
| <b>Table S3: The number of studies and participants of individual popular named diets for all outcomes</b> .....                                                                                                                            | 44 |
| <b>Table S4: The reported information on funding sources, conflict of interest, primary and secondary outcomes reported in RCTs</b> .....                                                                                                   | 47 |
| <b>Table S5: Summary of risk of bias by network nodes</b> .....                                                                                                                                                                             | 59 |
| <b>Table S6: GRADE assessment for 6-month weight loss in macronutrient composition NMA</b>                                                                                                                                                  | 64 |
| <b>Table S7: GRADE assessment for 6-month SBP reduction in macronutrient composition NMA</b><br>.....                                                                                                                                       | 66 |
| <b>Table S8: GRADE assessment for 6-month DBP reduction in macronutrient composition NMA</b><br>.....                                                                                                                                       | 68 |
| <b>Table S9: GRADE assessment for 6-month LDL reduction in macronutrient composition NMA</b><br>.....                                                                                                                                       | 70 |
| <b>Table S10: GRADE assessment for 6-month HDL increase in macronutrient composition NMA</b><br>.....                                                                                                                                       | 72 |
| <b>Table S11: GRADE assessment for 6-month CRP reduction in macronutrient composition NMA</b><br>.....                                                                                                                                      | 74 |
| <b>Table S12: Macronutrient composition NMA results for 6- and 12- months CRP reductions</b>                                                                                                                                                | 76 |
| <b>Table S13: Macronutrient composition NMA results for 12-month weight loss</b> .....                                                                                                                                                      | 77 |
| <b>Table S14: Macronutrient composition NMA results for 12-month SBP and DBP reductions</b><br>.....                                                                                                                                        | 78 |
| <b>Table S15: Macronutrient composition NMA results for 12-month LDL reduction and HDL increase</b><br>.....                                                                                                                                | 79 |
| <b>Table S16: 6-month weight loss across all macronutrient composition diet classes when restricted to overweight/obese yet otherwise healthy populations (below left) and restricted to low risk of bias studies (above right)</b> .....   | 80 |
| <b>Table S17: 6-month weight loss across all macronutrient composition diet classes when restricted to studies without diet company support</b> .....                                                                                       | 81 |
| <b>Table S18: 6-month SBP reduction across all macronutrient composition diet classes when restricted to overweight/obese yet otherwise healthy populations (below left) and restricted to low risk of bias studies (above right)</b> ..... | 82 |

|                                                                                                                                                                                                                                             |     |
|---------------------------------------------------------------------------------------------------------------------------------------------------------------------------------------------------------------------------------------------|-----|
| <b>Table S19: 6-month SBP across all macronutrient composition diet classes when restricted to studies without diet company support</b> .....                                                                                               | 83  |
| <b>Table S20: 6-month DBP reduction across all macronutrient composition diet classes when restricted to overweight/obese yet otherwise healthy populations (below left) and restricted to low risk of bias studies (above right)</b> ..... | 84  |
| <b>Table S21: 6-month DBP reduction across all macronutrient composition diet classes when restricted to studies without diet company support</b> .....                                                                                     | 85  |
| <b>Table S22: 6-month LDL reduction across all macronutrient composition diet classes when restricted to overweight/obese yet otherwise healthy populations (below left) and restricted to low risk of bias studies (above right)</b> ..... | 86  |
| <b>Table S23: 6-month LDL reduction across all macronutrient composition diet classes when restricted to studies without diet company support</b> .....                                                                                     | 87  |
| <b>Table S24: 6-month HDL increase across all macronutrient composition diet classes when restricted to overweight/obese yet otherwise healthy populations (below left) and restricted to low risk of bias studies (above right)</b> .....  | 88  |
| <b>Table S25: 6-month HDL increase across all macronutrient composition diet classes when restricted to studies without diet company support</b> .....                                                                                      | 89  |
| <b>Table S26: 6-month weight loss across all macronutrient composition diet classes after adjusting for behavior support and exercise</b> .....                                                                                             | 90  |
| <b>Table S27: 6-month SBP and DBP reductions across all macronutrient composition diet classes after adjusting for behavior support and exercise</b> .....                                                                                  | 91  |
| <b>Table S28: 6-month LDL reduction and HDL increase across all macronutrient composition diet classes after adjusting for behavior support and exercise</b> .....                                                                          | 92  |
| <b>Table S29: GRADE assessment for 6-month weight loss in individual popular diets NMA</b> ....                                                                                                                                             | 93  |
| <b>Table S30: GRADE assessment for 6-month SBP reduction in individual popular diets NMA</b> .....                                                                                                                                          | 107 |
| <b>Table S31: GRADE assessment for 6-month DBP reduction in individual popular diets NMA</b> .....                                                                                                                                          | 118 |
| <b>Table S32: GRADE assessment for 6-month LDL reduction in individual popular diets NMA</b> .....                                                                                                                                          | 129 |
| <b>Table S33: GRADE assessment for 6-month HDL reduction in individual popular diets NMA</b> .....                                                                                                                                          | 142 |
| <b>Table S34: GRADE assessment for 6-month CRP reduction in individual popular diets NMA</b> .....                                                                                                                                          | 153 |
| <b>Table S35: Summary of individual popular diets NMA for all outcomes at 6 months</b> .....                                                                                                                                                | 160 |
| <b>Table 36: Individual popular diets NMA results with GRADE certainty of evidence for weight loss at 6 months (kg)</b> .....                                                                                                               | 163 |
| <b>Table S37: Individual popular diets NMA results for weight loss at 12 months (kg)</b> .....                                                                                                                                              | 165 |

|                                                                                                                                                                                                                               |            |
|-------------------------------------------------------------------------------------------------------------------------------------------------------------------------------------------------------------------------------|------------|
| <b>Table S38: Individual popular diets NMA results with GRADE certainty of evidence for both DBP reduction (above right) and SBP reduction (below left) at 6 months (mm Hg) .....</b>                                         | <b>166</b> |
| <b>Table S39: DBP reduction (above right) and SBP reduction (below left) at 12 months across individual popular diets with 95% credible intervals .....</b>                                                                   | <b>168</b> |
| <b>Table S40: Individual popular diets NMA results with GRADE certainty of evidence for both HDL increase (above right) and LDL reduction (below left) at 6 months (mg/dL).....</b>                                           | <b>169</b> |
| <b>Table S41: HDL increase (above right) and LDL reduction (below left) at 12 months across individual popular diets with 95% credible intervals .....</b>                                                                    | <b>171</b> |
| <b>Table S42: Individual popular diets NMA results with GRADE certainty of evidence for CRP reduction (mg/dL).....</b>                                                                                                        | <b>172</b> |
| <b>Table S43: 6-month weight loss across all individual popular diets when restricted to overweight/obese yet otherwise healthy populations (below left) and restricted to low risk of bias studies (above right) .....</b>   | <b>173</b> |
| <b>Table S44: 6-month weight loss across all individual popular diets when restricted to studies without diet company support .....</b>                                                                                       | <b>175</b> |
| <b>Table S45: 6-month weight loss across all individual popular diets accounting for both of behavior support and exercise .....</b>                                                                                          | <b>176</b> |
| <b>Table S46: 6-month SBP reduction across all individual popular diets when restricted to overweight/obese yet otherwise healthy populations (below left) and restricted to low risk of bias studies (above right) .....</b> | <b>178</b> |
| <b>Table S47: 6-month SBP reduction across all individual popular diets when restricted to studies without diet company support.....</b>                                                                                      | <b>180</b> |
| <b>Table S48: 6-month SBP reduction across all individual popular diets accounting for both of behavior support and exercise .....</b>                                                                                        | <b>181</b> |
| <b>Table S49: 6-month DBP reduction across all individual popular diets when restricted to overweight/obese yet otherwise healthy populations (below left) and restricted to low risk of bias studies (above right) .....</b> | <b>183</b> |
| <b>Table S50: 6-month DBP reduction across all individual popular diets when restricted to studies without diet company support.....</b>                                                                                      | <b>185</b> |
| <b>Table S51: 6-month DBP reduction across all individual popular diets accounting for both of behavior support and exercise .....</b>                                                                                        | <b>186</b> |
| <b>Table S52: 6-month LDL reduction across all individual popular diets when restricted to overweight/obese yet otherwise healthy populations (below left) and restricted to low risk of bias studies (above right) .....</b> | <b>188</b> |
| <b>Table S53: 6-month LDL reduction across all individual popular diets when restricted to studies without diet company support.....</b>                                                                                      | <b>190</b> |
| <b>Table S54: Network meta-regression adjusting for behavior support and exercise for 6-month LDL reduction .....</b>                                                                                                         | <b>191</b> |

|                                                                                                                                                                                                                              |     |
|------------------------------------------------------------------------------------------------------------------------------------------------------------------------------------------------------------------------------|-----|
| <b>Table S55: 6-month HDL increase across all individual popular diets when restricted to overweight/obese yet otherwise healthy populations (below left) and restricted to low risk of bias studies (above right)</b> ..... | 193 |
| <b>Table S56: 6-month HDL increase across all individual popular diets when restricted to studies without diet company support</b> .....                                                                                     | 195 |
| <b>Table S57: 6-month HDL increase across all individual popular diets accounting for both of behavior support and exercise</b> .....                                                                                        | 196 |
| <b>Table S58: GRADE assessment for 12-month weight loss in macronutrient composition NMA</b> .....                                                                                                                           | 198 |
| <b>Table S59: GRADE assessment for 12-month SBP reduction in macronutrient composition NMA</b> .....                                                                                                                         | 200 |
| <b>Table S60: GRADE assessment for 12-month DBP reduction in macronutrient composition NMA</b> .....                                                                                                                         | 202 |
| <b>Table S61: GRADE assessment for 12-month LDL reduction in macronutrient composition NMA</b> .....                                                                                                                         | 204 |
| <b>Table S62: GRADE assessment for 12-month HDL increase in macronutrient composition NMA</b> .....                                                                                                                          | 206 |
| <b>Table S63: GRADE assessment for 12-month CRP reduction in macronutrient composition NMA</b> .....                                                                                                                         | 208 |
| <b>Figure S1: Network plots for weight loss</b> .....                                                                                                                                                                        | 210 |
| <b>Figure S2: Network plots for SBP reduction</b> .....                                                                                                                                                                      | 212 |
| <b>Figure S3: Network plots for DBP reduction</b> .....                                                                                                                                                                      | 214 |
| <b>Figure S4: Network plots for LDL reduction</b> .....                                                                                                                                                                      | 216 |
| <b>Figure S5: Network plots for HDL increase</b> .....                                                                                                                                                                       | 218 |
| <b>Figure S6: Network plots for CRP reduction</b> .....                                                                                                                                                                      | 220 |
| <b>Figure S7: SUCRA values (%) for all outcomes at 6 months follow-up in individual popular diets NMA</b> .....                                                                                                              | 222 |

## Text S1: Search strategies

### MEDLINE: Epub Ahead of Print, In-Process & Other Non-Indexed Citations, MEDLINE Daily and MEDLINE 1946-Present

| #  | Searches                                                                                                                                                                    |
|----|-----------------------------------------------------------------------------------------------------------------------------------------------------------------------------|
| 1  | (atkins and (diet* or weight* or obes*)).mp.                                                                                                                                |
| 2  | (ediet* and (diet* or weight* or obes*)).mp.                                                                                                                                |
| 3  | (dukan and (diet* or weight* or obes*)).mp.                                                                                                                                 |
| 4  | (mediterranean and (diet* or weight* or obes*)).mp.                                                                                                                         |
| 5  | ((paleolithic or paleo) and (diet* or weight* or obes*)).mp.                                                                                                                |
| 6  | (zone adj3 (diet* or weight* or obes*)).mp.                                                                                                                                 |
| 7  | (south beach and (diet* or weight* or obes*)).mp.                                                                                                                           |
| 8  | (ornish and (diet* or weight* or obes*)).mp.                                                                                                                                |
| 9  | (volumetrics and (diet* or weight* or obes*)).mp.                                                                                                                           |
| 10 | ("protein power" and (diet* or weight* or obes*)).mp.                                                                                                                       |
| 11 | (nutrisystem and (diet* or weight* or obes*)).mp.                                                                                                                           |
| 12 | ((("weight watcher*" or weightwatcher*) and (diet* or weight* or obes*)).mp.                                                                                                |
| 13 | ((("jenny craig*" or jennycraig*) and (diet* or weight* or obes*)).mp.                                                                                                      |
| 14 | ((("rosemary conley" or "eat yourself thin") and (diet* or weight* or obes*)).mp.                                                                                           |
| 15 | ("slimming world" and (diet* or weight* or obes*)).mp.                                                                                                                      |
| 16 | ("biggest loser" and (diet* or weight* or obes*)).mp.                                                                                                                       |
| 17 | ((dash or "dietary approach* to stop* hypertension") and (diet* or weight* or obes*)).mp.                                                                                   |
| 18 | ("Lifestyle, Exercise, Attitudes, Relationships, and Nutrition" and (diet* or weight* or obes*)).mp.                                                                        |
| 19 | (learn diet* or learn program*).mp.                                                                                                                                         |
| 20 | Diet, Carbohydrate-Restricted/                                                                                                                                              |
| 21 | ((low carb* or carb* restrict* or restrict* carb*) and diet*).mp.                                                                                                           |
| 22 | Diet, Sodium-Restricted/                                                                                                                                                    |
| 23 | ((low sodium or low salt or salt restrict* or salt free or saltless or sodium free or sodium restrict* or reduc* salt or reduc* sodium or natrium restrict*) and diet*).mp. |
| 24 | Diet, Mediterranean/                                                                                                                                                        |
| 25 | Diet, Fat-Restricted/                                                                                                                                                       |
| 26 | ((low fat or fat free or fat restrict* or restrict* fat or lipid restrict* or restrict* lipid or low lipid) and diet*).mp.                                                  |
| 27 | Diet Fads/                                                                                                                                                                  |
| 28 | ((fad or fads) adj3 (diet* or food or foods)).mp.                                                                                                                           |
| 29 | ("portfolio diet" or "portfolio diets" or "dietary portfolio" or "portfolio of heart risk reducing foods" or "portfolio eating plan").mp.                                   |
| 30 | or/1-29                                                                                                                                                                     |
| 31 | randomized controlled trial.pt.                                                                                                                                             |
| 32 | controlled clinical trial.pt.                                                                                                                                               |
| 33 | randomized.ab.                                                                                                                                                              |

|    |                                                                                                                                   |
|----|-----------------------------------------------------------------------------------------------------------------------------------|
| 34 | placebo.ab.                                                                                                                       |
| 35 | drug therapy.fs.                                                                                                                  |
| 36 | randomly.ab.                                                                                                                      |
| 37 | trial.ab.                                                                                                                         |
| 38 | groups.ab.                                                                                                                        |
| 39 | or/31-38                                                                                                                          |
| 40 | exp animals/ not humans.sh.                                                                                                       |
| 41 | 39 not 40 [****Cochrane Handbook Highly Sensitive Search Strategy for identifying randomized trials (Box 6.4.c 2008 version)****] |
| 42 | 30 and 41 [fad diets and Cochrane sensitive randomized search]                                                                    |
| 43 | limit 42 to english language                                                                                                      |
| 44 | (adult or adults or elderly or aged or middle age).mp.                                                                            |
| 45 | 43 and 44                                                                                                                         |
| 46 | (randomized controlled trial or controlled clinical trial).pt.                                                                    |
| 47 | randomized controlled trials/ or random allocation/ or double-blind method/ or single-blind method/                               |
| 48 | clinical trial.pt.                                                                                                                |
| 49 | exp clinical trials/ or placebos/ or research design/                                                                             |
| 50 | (clinic* adj25 trial*).mp.                                                                                                        |
| 51 | ((singl* or doubl* or trebl* or tripl*) adj (mask* or blind*)).mp.                                                                |
| 52 | (placebo* or random*).mp.                                                                                                         |
| 53 | (latin adj square).mp.                                                                                                            |
| 54 | comparative study/ or exp evaluation studies/ or follow-up studies/ or prospective studies/ or cross-over studies/                |
| 55 | (control* or prospective* or volunteer*).mp.                                                                                      |
| 56 | or/46-55                                                                                                                          |
| 57 | animal/ not human/                                                                                                                |
| 58 | 56 not 57 [Robinson_Dickersin - sensitive strategy for RCTs]                                                                      |
| 59 | 30 and 58 [fad diets and Robinson_Dickersin sensitive randomized search]                                                          |
| 60 | limit 59 to english language                                                                                                      |
| 61 | 44 and 60                                                                                                                         |
| 62 | 45 or 61                                                                                                                          |

#### Embase Classic+Embase 1947 to Present

| # | Searches                                                     |
|---|--------------------------------------------------------------|
| 1 | (atkins and (diet* or weight* or obes*)).mp.                 |
| 2 | (ediet* and (diet* or weight* or obes*)).mp.                 |
| 3 | (dukan and (diet* or weight* or obes*)).mp.                  |
| 4 | (mediterranean and (diet* or weight* or obes*)).mp.          |
| 5 | ((paleolithic or paleo) and (diet* or weight* or obes*)).mp. |

|    |                                                                                                                                                                             |
|----|-----------------------------------------------------------------------------------------------------------------------------------------------------------------------------|
| 6  | (zone adj3 (diet* or weight* or obes*)).mp.                                                                                                                                 |
| 7  | (south beach and (diet* or weight* or obes*)).mp.                                                                                                                           |
| 8  | (ornish and (diet* or weight* or obes*)).mp.                                                                                                                                |
| 9  | (volumetrics and (diet* or weight* or obes*)).mp.                                                                                                                           |
| 10 | ("protein power" and (diet* or weight* or obes*)).mp.                                                                                                                       |
| 11 | (nutrisystem and (diet* or weight* or obes*)).mp.                                                                                                                           |
| 12 | ((("weight watcher*" or weightwatcher*) and (diet* or weight* or obes*)).mp.                                                                                                |
| 13 | ((("jenny craig*" or jennycraig*) and (diet* or weight* or obes*)).mp.                                                                                                      |
| 14 | ((("rosemary conley" or "eat yourself thin") and (diet* or weight* or obes*)).mp.                                                                                           |
| 15 | ("biggest loser" and (diet* or weight* or obes*)).mp.                                                                                                                       |
| 16 | ((dash or "dietary approach* to stop* hypertension") and (diet* or weight* or obes*)).mp.                                                                                   |
| 17 | ("slimming world" and (diet* or weight* or obes*)).mp.                                                                                                                      |
| 18 | ("Lifestyle, Exercise, Attitudes, Relationships, and Nutrition" and (diet* or weight* or obes*)).mp.                                                                        |
| 19 | (learn diet or learn program).mp.                                                                                                                                           |
| 20 | low carbohydrate diet/                                                                                                                                                      |
| 21 | ((low carb* or carb* restrict*) and diet*).mp.                                                                                                                              |
| 22 | sodium restriction/                                                                                                                                                         |
| 23 | ((low sodium or low salt or salt restrict* or salt free or saltless or sodium free or sodium restrict* or reduc* salt or reduc* sodium or natrium restrict*) and diet*).mp. |
| 24 | Mediterranean diet/                                                                                                                                                         |
| 25 | low fat diet/                                                                                                                                                               |
| 26 | ((low fat or fat free or fat restrict* or restrict* fat or lipid restrict* or restrict* lipid or low lipid) and diet*).mp.                                                  |
| 27 | ((fad or fads) adj3 (diet* or food or foods)).mp.                                                                                                                           |
| 28 | ("portfolio diet" or "portfolio diets" or "dietary portfolio" or "portfolio of heart risk reducing foods" or "portfolio eating plan").mp.                                   |
| 29 | or/1-28                                                                                                                                                                     |
| 30 | random*.mp.                                                                                                                                                                 |
| 31 | factorial*.mp.                                                                                                                                                              |
| 32 | crossover*.mp.                                                                                                                                                              |
| 33 | cross over*.mp.                                                                                                                                                             |
| 34 | placebo*.mp.                                                                                                                                                                |
| 35 | (doubl* adj blind*).mp.                                                                                                                                                     |
| 36 | (singl* adj blind*).mp.                                                                                                                                                     |
| 37 | assign*.mp.                                                                                                                                                                 |
| 38 | allocat*.mp.                                                                                                                                                                |
| 39 | volunteer*.mp.                                                                                                                                                              |
| 40 | crossover-procedure/                                                                                                                                                        |
| 41 | double-blind procedure/                                                                                                                                                     |
| 42 | randomized controlled trial/                                                                                                                                                |



|    |                                                                                                                                  |
|----|----------------------------------------------------------------------------------------------------------------------------------|
| 43 | single blind procedure/                                                                                                          |
| 44 | or/30-43                                                                                                                         |
| 45 | Animals/ not humans/                                                                                                             |
| 46 | 44 not 45 [Modified Cochrane Handbook 6.3.2.2 Recommendation for Embase]                                                         |
| 47 | 29 and 46                                                                                                                        |
| 48 | limit 47 to english language                                                                                                     |
| 49 | (adult or adults or elderly or aged or middle age).mp.                                                                           |
| 50 | 48 and 49                                                                                                                        |
| 51 | ct.fs.                                                                                                                           |
| 52 | randomized controlled trial/ or random allocation/ or double-blind method/ or single-blind method/ or controlled clinical trial/ |
| 53 | (rct or rcts or sham).mp.                                                                                                        |
| 54 | exp clinical trials/ or placebo/ or latin square design/                                                                         |
| 55 | (clinic* adj25 trial*).mp.                                                                                                       |
| 56 | ((singl* or doubl* or trebl* or tripl*) adj (mask* or blind*)).mp.                                                               |
| 57 | (placebo* or random*).mp.                                                                                                        |
| 58 | (latin adj square).mp.                                                                                                           |
| 59 | comparative study/ or exp evaluation studies/ or follow-up studies/ or prospective studies/ or cross-over studies/               |
| 60 | (control* or prospective* or volunteer*).mp.                                                                                     |
| 61 | or/51-60                                                                                                                         |
| 62 | Animals/ not humans/                                                                                                             |
| 63 | 61 not 62 [Robinson_Dickersin sensitive randomized trial]                                                                        |
| 64 | 29 and 63                                                                                                                        |
| 65 | limit 64 to english language                                                                                                     |
| 66 | 65 and 49                                                                                                                        |
| 67 | 50 or 66                                                                                                                         |

### Cochrane Central Register of Controlled Trials September 2018

| #  | Searches                                                     |
|----|--------------------------------------------------------------|
| 1  | (atkins and (diet* or weight* or obes*)).mp.                 |
| 2  | (ediet* and (diet* or weight* or obes*)).mp.                 |
| 3  | (dukan and (diet* or weight* or obes*)).mp.                  |
| 4  | (mediterranean and (diet* or weight* or obes*)).mp.          |
| 5  | ((paleolithic or paleo) and (diet* or weight* or obes*)).mp. |
| 6  | (zone adj3 (diet* or weight* or obes*)).mp.                  |
| 7  | (south beach and (diet* or weight* or obes*)).mp.            |
| 8  | (ornish and (diet* or weight* or obes*)).mp.                 |
| 9  | (volumetrics and (diet* or weight* or obes*)).mp.            |
| 10 | ("protein power" and (diet* or weight* or obes*)).mp.        |

|    |                                                                                                                                                                             |
|----|-----------------------------------------------------------------------------------------------------------------------------------------------------------------------------|
| 11 | (nutrisystem and (diet* or weight* or obes*)).mp.                                                                                                                           |
| 12 | ((("weight watcher*" or weightwatcher*) and (diet* or weight* or obes*)).mp.                                                                                                |
| 13 | ((("jenny craig*" or jennycraig*) and (diet* or weight* or obes*)).mp.                                                                                                      |
| 14 | ((("rosemary conley" or "eat yourself thin") and (diet* or weight* or obes*)).mp.                                                                                           |
| 15 | ("biggest loser" and (diet* or weight* or obes*)).mp.                                                                                                                       |
| 16 | ((dash or "dietary approach* to stop* hypertension") and (diet* or weight* or obes*)).mp.                                                                                   |
| 17 | ("slimming world" and (diet* or weight* or obes*)).mp.                                                                                                                      |
| 18 | ("Lifestyle, Exercise, Attitudes, Relationships, and Nutrition" and (diet* or weight* or obes*)).mp.                                                                        |
| 19 | (learn diet or learn program).mp.                                                                                                                                           |
| 20 | Diet, Carbohydrate-Restricted/                                                                                                                                              |
| 21 | ((low carb* or carb* restrict* or restrict* carb*) and diet*).mp.                                                                                                           |
| 22 | Diet, Sodium-Restricted/                                                                                                                                                    |
| 23 | ((low sodium or low salt or salt restrict* or salt free or saltless or sodium free or sodium restrict* or reduc* salt or reduc* sodium or natrium restrict*) and diet*).mp. |
| 24 | Diet, Mediterranean/                                                                                                                                                        |
| 25 | Diet, Fat-Restricted/                                                                                                                                                       |
| 26 | ((low fat or fat free or fat restrict* or restrict* fat or lipid restrict* or restrict* lipid or low lipid) and diet*).mp.                                                  |
| 27 | Diet Fads/                                                                                                                                                                  |
| 28 | ((fad or fads) adj3 (diet* or food or foods)).mp.                                                                                                                           |
| 29 | ("portfolio diet" or "portfolio diets" or "dietary portfolio" or "portfolio of heart risk reducing foods" or "portfolio eating plan").mp.                                   |
| 30 | or/1-29                                                                                                                                                                     |
| 31 | Humans/                                                                                                                                                                     |
| 32 | 30 and 31                                                                                                                                                                   |
| 33 | (adult or adults or elderly or aged or middle age).mp.                                                                                                                      |
| 34 | 32 and 33                                                                                                                                                                   |
| 35 | limit 34 to english language                                                                                                                                                |

**CINAHL**

| #   | Query                                                                                      | Limiters/Expanders                                                   |
|-----|--------------------------------------------------------------------------------------------|----------------------------------------------------------------------|
| S44 | S28 AND S42                                                                                | Narrow by<br>Language: - english<br>Search modes -<br>Boolean/Phrase |
| S43 | S28 AND S42                                                                                | Search modes -<br>Boolean/Phrase                                     |
| S42 | S29 OR S30 OR S31 OR S32 OR S33 OR S34 OR S35 OR S36 OR S37<br>OR S38 OR S39 OR S40 OR S41 | Search modes -<br>Boolean/Phrase                                     |

|     |                                                                                                                                                                                                                                                                                                                                                                                                |                               |
|-----|------------------------------------------------------------------------------------------------------------------------------------------------------------------------------------------------------------------------------------------------------------------------------------------------------------------------------------------------------------------------------------------------|-------------------------------|
| S41 | TI (allocat* random*) OR AB (allocat* random*)                                                                                                                                                                                                                                                                                                                                                 | Search modes - Boolean/Phrase |
| S40 | (MH "Quantitative Studies")                                                                                                                                                                                                                                                                                                                                                                    | Search modes - Boolean/Phrase |
| S39 | (MH "Placebos")                                                                                                                                                                                                                                                                                                                                                                                | Search modes - Boolean/Phrase |
| S38 | TI placebo* OR AB placebo*                                                                                                                                                                                                                                                                                                                                                                     | Search modes - Boolean/Phrase |
| S37 | TI (random* allocat*) OR AB (random* allocat*)                                                                                                                                                                                                                                                                                                                                                 | Search modes - Boolean/Phrase |
| S36 | (MH "Random Assignment")                                                                                                                                                                                                                                                                                                                                                                       | Search modes - Boolean/Phrase |
| S35 | TI (randomi* control* trial*) OR AB (randomi* control* trial*)                                                                                                                                                                                                                                                                                                                                 | Search modes - Boolean/Phrase |
| S34 | TI ((singl* N1 blind*) OR (singl* N1 mask*)) OR TI ( (doubl* N1 blind*) OR (doubl* N1 mask*)) OR TI ((tripl* N1 blind*) OR (tripl* N1 mask*)) OR TI ((trebl* N1 blind*) OR (trebl* N1 mask*)) OR AB ((singl* N1 blind*) OR (singl* N1 mask*)) OR AB ( (doubl* N1 blind*) OR (doubl* N1 mask*)) OR AB ((tripl* N1 blind*) OR (tripl* N1 mask*)) OR AB ((trebl* N1 blind*) OR (trebl* N1 mask*)) | Search modes - Boolean/Phrase |
| S33 | TI (clinic* N1 trial*) OR AB (clinic* N1 trial*)                                                                                                                                                                                                                                                                                                                                               | Search modes - Boolean/Phrase |
| S32 | PT Clinical trial                                                                                                                                                                                                                                                                                                                                                                              | Search modes - Boolean/Phrase |
| S31 | (MH "Clinical Trials+")                                                                                                                                                                                                                                                                                                                                                                        | Search modes - Boolean/Phrase |
| S30 | S28 AND S29                                                                                                                                                                                                                                                                                                                                                                                    | Search modes - Boolean/Phrase |
| S29 | TI (adult OR adults OR elderly OR aged OR middle age) OR AB (adult OR adults OR elderly OR aged OR middle age)                                                                                                                                                                                                                                                                                 | Search modes - Boolean/Phrase |
| S28 | S1 OR S2 OR S3 OR S4 OR S5 OR S6 OR S7 OR S8 OR S9 OR S10 OR S11 OR S12 OR S13 OR S14 OR S15 OR S16 OR S17 OR S18 OR S19 OR S20 OR S21 OR S22 OR S23 OR S24 OR S25 OR S26 OR S27                                                                                                                                                                                                               | Search modes - Boolean/Phrase |
| S27 | TI ("portfolio diet" or "portfolio diets" or "dietary portfolio" or "portfolio of heart risk reducing foods" or "portfolio eating plan") OR AB ("portfolio diet" or "portfolio diets" or "dietary portfolio" or "portfolio of heart risk reducing foods" or "portfolio eating plan")                                                                                                           | Search modes - Boolean/Phrase |

|     |                                                                                                                                                                                                                                                                                                                                                          |                               |
|-----|----------------------------------------------------------------------------------------------------------------------------------------------------------------------------------------------------------------------------------------------------------------------------------------------------------------------------------------------------------|-------------------------------|
| S26 | TI ((fad N3 diet*) OR (fad N3 food) OR (fad N3 foods)) OR TI ((fads N3 diet*) OR (fads N3 food) OR (fads N3 foods)) OR AB ((fad N3 diet*) OR (fad N3 food) OR (fad N3 foods)) OR AB ((fads N3 diet*) OR (fads N3 food) OR (fads N3 foods))                                                                                                               | Search modes - Boolean/Phrase |
| S25 | (MH "Diet Fads")                                                                                                                                                                                                                                                                                                                                         | Search modes - Boolean/Phrase |
| S24 | TI ((low sodium OR low salt OR salt restrict* OR salt free OR saltless OR sodium free OR sodium restrict* OR reduc* salt OR reduc* sodium OR natrium restrict*) AND diet*) OR AB ((low sodium OR low salt OR salt restrict* OR salt free OR saltless OR sodium free OR sodium restrict* OR reduc* salt OR reduc* sodium OR natrium restrict*) AND diet*) | Search modes - Boolean/Phrase |
| S23 | (MH "Diet, Sodium-Restricted")                                                                                                                                                                                                                                                                                                                           | Search modes - Boolean/Phrase |
| S22 | TI ((low fat OR fat free OR fat restrict* OR restrict* fat OR lipid restrict* OR restrict* lipid OR low lipid) AND diet*) OR AB ((low fat OR fat free OR fat restrict* OR restrict* fat OR lipid restrict* OR restrict* lipid OR low lipid) AND diet*)                                                                                                   | Search modes - Boolean/Phrase |
| S21 | (MH "Diet, Fat-Restricted")                                                                                                                                                                                                                                                                                                                              | Search modes - Boolean/Phrase |
| S20 | TI ((low carb* OR carb* restrict*) AND diet*) OR AB ((low carb* OR carb* restrict*) AND diet*)                                                                                                                                                                                                                                                           | Search modes - Boolean/Phrase |
| S19 | (MH "Diet, Low Carbohydrate")                                                                                                                                                                                                                                                                                                                            | Search modes - Boolean/Phrase |
| S18 | (MH "Mediterranean Diet")                                                                                                                                                                                                                                                                                                                                | Search modes - Boolean/Phrase |
| S17 | (MH "DASH Diet")                                                                                                                                                                                                                                                                                                                                         | Search modes - Boolean/Phrase |
| S16 | TI (learn diet OR learn program) OR AB (learn diet OR learn program)                                                                                                                                                                                                                                                                                     | Search modes - Boolean/Phrase |
| S15 | TI ("Lifestyle, Exercise, Attitudes, Relationships, AND Nutrition" AND (diet* OR weight* OR obes*)) OR AB ("Lifestyle, Exercise, Attitudes, Relationships, AND Nutrition" AND (diet* OR weight* OR obes*))                                                                                                                                               | Search modes - Boolean/Phrase |
| S14 | TI (("slimming world") AND (diet* OR weight* OR obes*)) OR AB (("slimming world") AND (diet* OR weight* OR obes*))                                                                                                                                                                                                                                       | Search modes - Boolean/Phrase |

|     |                                                                                                                                                                                      |                               |
|-----|--------------------------------------------------------------------------------------------------------------------------------------------------------------------------------------|-------------------------------|
| S13 | TI ((dash OR "dietary approach* to stop* hypertension") AND (diet* OR weight* OR obes*)) OR AB ((dash OR "dietary approach* to stop* hypertension") AND (diet* OR weight* OR obes*)) | Search modes - Boolean/Phrase |
| S12 | TI ("biggest loser" AND (diet* OR weight* OR obes*)) OR AB ("biggest loser" AND (diet* OR weight* OR obes*))                                                                         | Search modes - Boolean/Phrase |
| S11 | TI (("rosemary conley" OR "eat yourself thin") AND (diet* OR weight* OR obes*)) OR AB (("rosemary conley" OR "eat yourself thin") AND (diet* OR weight* OR obes*))                   | Search modes - Boolean/Phrase |
| S10 | TI (("jenny craig*" OR jennycraig*) AND (diet* OR weight* OR obes*)) OR AB (("jenny craig*" OR jennycraig*) AND (diet* OR weight* OR obes*))                                         | Search modes - Boolean/Phrase |
| S9  | TI (("weight watcher*" OR weightwatcher*) AND (diet* OR weight* OR obes*)) OR AB (("weight watcher*" OR weightwatcher*) AND (diet* OR weight* OR obes*))                             | Search modes - Boolean/Phrase |
| S8  | TI (nutrisystem AND (diet* OR weight* OR obes*)) OR AB (nutrisystem AND (diet* OR weight* OR obes*))                                                                                 | Search modes - Boolean/Phrase |
| S7  | TI ("protein power" AND (diet* OR weight* OR obes*)) OR AB ("protein power" AND (diet* OR weight* OR obes*))                                                                         | Search modes - Boolean/Phrase |
| S6  | TI (volumetrics AND (diet* OR weight* OR obes*)) OR AB (volumetrics AND (diet* OR weight* OR obes*))                                                                                 | Search modes - Boolean/Phrase |
| S5  | TI (ornish AND (diet* OR weight* OR obes*)) OR AB (ornish AND (diet* OR weight* OR obes*))                                                                                           | Search modes - Boolean/Phrase |
| S4  | TI (south beach AND (diet* OR weight* OR obes*)) OR AB (south beach AND (diet* OR weight* OR obes*))                                                                                 | Search modes - Boolean/Phrase |
| S3  | TI ((zone N3 diet*) OR (zone N3 weight*) OR (zone N3 obes*)) OR AB ((zone N3 diet*) OR (zone N3 weight*) OR (zone N3 obes*))                                                         | Search modes - Boolean/Phrase |
| S2  | TI ((paleolithic OR paleo) AND (diet* OR weight* OR obes*)) OR AB ((paleolithic OR paleo) AND (diet* OR weight* OR obes*))                                                           | Search modes - Boolean/Phrase |
| S1  | TI (mediterranean AND (diet* OR weight* OR obes*)) OR AB (mediterranean AND (diet* OR weight* OR obes*))                                                                             | Search modes - Boolean/Phrase |

#### AMED (Allied and Complementary Medicine) 1985 to Present

| # | Searches                                    |
|---|---------------------------------------------|
| 1 | (atkins and (diet* or weight* or obes*).mp. |
| 2 | (ediet* and (diet* or weight* or obes*).mp. |
| 3 | (dukan and (diet* or weight* or obes*).mp.  |

|    |                                                                                                                                                                             |
|----|-----------------------------------------------------------------------------------------------------------------------------------------------------------------------------|
| 4  | (mediterranean and (diet* or weight* or obes*)).mp.                                                                                                                         |
| 5  | ((paleolithic or paleo) and (diet* or weight* or obes*)).mp.                                                                                                                |
| 6  | (zone adj3 (diet* or weight* or obes*)).mp.                                                                                                                                 |
| 7  | (south beach and (diet* or weight* or obes*)).mp.                                                                                                                           |
| 8  | (ornish and (diet* or weight* or obes*)).mp.                                                                                                                                |
| 9  | (volumetrics and (diet* or weight* or obes*)).mp.                                                                                                                           |
| 10 | ("protein power" and (diet* or weight* or obes*)).mp.                                                                                                                       |
| 11 | (nutrisystem and (diet* or weight* or obes*)).mp.                                                                                                                           |
| 12 | ((("weight watcher*" or weightwatcher*) and (diet* or weight* or obes*)).mp.                                                                                                |
| 13 | ((("jenny craig*" or jennycraig*) and (diet* or weight* or obes*)).mp.                                                                                                      |
| 14 | ((("rosemary conley" or "eat yourself thin") and (diet* or weight* or obes*)).mp.                                                                                           |
| 15 | ("slimming world" and (diet* or weight* or obes*)).mp.                                                                                                                      |
| 16 | ("biggest loser" and (diet* or weight* or obes*)).mp.                                                                                                                       |
| 17 | ((dash or "dietary approach* to stop* hypertension") and (diet* or weight* or obes*)).mp.                                                                                   |
| 18 | ("Lifestyle, Exercise, Attitudes, Relationships, and Nutrition" and (diet* or weight* or obes*)).mp.                                                                        |
| 19 | (learn diet* or learn program*).mp.                                                                                                                                         |
| 20 | ((low carb* or carb* restrict* or restrict* carb*) and diet*).mp.                                                                                                           |
| 21 | ((low sodium or low salt or salt restrict* or salt free or saltless or sodium free or sodium restrict* or reduc* salt or reduc* sodium or natrium restrict*) and diet*).mp. |
| 22 | Diet Mediterranean/                                                                                                                                                         |
| 23 | ((low fat or fat free or fat restrict* or restrict* fat or lipid restrict* or restrict* lipid or low lipid) and diet*).mp.                                                  |
| 24 | Diet Fads/                                                                                                                                                                  |
| 25 | ((fad or fads) adj3 (diet* or food or foods)).mp.                                                                                                                           |
| 26 | ("portfolio diet" or "portfolio diets" or "dietary portfolio" or "portfolio of heart risk reducing foods" or "portfolio eating plan").mp.                                   |
| 27 | or/1-26                                                                                                                                                                     |
| 28 | randomized controlled trials/                                                                                                                                               |
| 29 | Randomized Controlled Trial.pt.                                                                                                                                             |
| 30 | controlled clinical trial.pt.                                                                                                                                               |
| 31 | randomized.ab.                                                                                                                                                              |
| 32 | placebo.ab.                                                                                                                                                                 |
| 33 | drug therapy/                                                                                                                                                               |
| 34 | randomly.ab.                                                                                                                                                                |
| 35 | trial.ab.                                                                                                                                                                   |
| 36 | groups.ab.                                                                                                                                                                  |
| 37 | or/28-36                                                                                                                                                                    |
| 38 | exp animals/ not human.sh.                                                                                                                                                  |
| 39 | 37 not 38 [Modified Cochrane Handbook Highly Sensitive Search Strategy for identifying randomized trials (Box 6.4.c 2008 version)]                                          |
| 40 | 27 and 39 [fad diets and modified Cochrane sensitive randomized search]                                                                                                     |

|    |                                                                             |
|----|-----------------------------------------------------------------------------|
| 41 | limit 40 to english                                                         |
| 42 | (Randomized Controlled Trial or controlled clinical trial).pt.              |
| 43 | randomized controlled trials/ or double blind method/ or random allocation/ |
| 44 | single blind method/                                                        |
| 45 | clinical trial.pt.                                                          |
| 46 | research design/ or clinical trials/                                        |
| 47 | placebos/                                                                   |
| 48 | (clinic* adj25 trial*).mp.                                                  |
| 49 | ((singl* or doubl* or trebl* or tripl*) adj (mask* or blind*)).mp.          |
| 50 | (placebo* or random*).mp.                                                   |
| 51 | (latin adj square).mp.                                                      |
| 52 | comparative study/                                                          |
| 53 | follow up studies/ or prospective studies/                                  |
| 54 | (control* or prospective* or volunteer*).mp.                                |
| 55 | or/42-54                                                                    |
| 56 | exp animals/ not human.sh.                                                  |
| 57 | 55 not 56 [Modified Robinson_Dickersin sensitive randomized search]         |
| 58 | 20 and 57 [fad diets and Robinson_Dickersin sensitive randomized search]    |
| 59 | limit 58 to english                                                         |
| 60 | 41 or 59                                                                    |

## Text S2: Details on the missing SDs imputation for each outcome

### Methods for imputation of missing standard deviations

We used published standard deviations (SDs), where available. When standard errors instead of SDs were presented, the former was converted to SDs.<sup>1</sup> If both were missing, we estimated SDs from P values or confidence interval (CIs) according to the recommendations of the Cochrane Handbook for Systematic Reviews.<sup>1</sup> We also estimated SDs from graphs when they were missing in tables or in text. If studies reported medians and interquartile ranges (IQRs), we used median to impute the missing mean and calculated SDs by dividing IQRs by 1.35.<sup>1</sup> If none of these options are viable, we imputed the missing SDs using pooled SDs from other studies included in our NMA following the formula below:<sup>2</sup>

$$SD_{pooled} = \sqrt{\frac{\sum(n_i - 1)SD_i^2}{\sum(n_i - 1)}}$$

1. Higgins JPT, Deeks JJ (editors). Chapter 7: Selecting studies and collecting data. In: Higgins JPT, Green S (editors), Cochrane Handbook for Systematic Reviews of Interventions. Version 5.1.0 [updated March 2011]. The Cochrane Collaboration, 2011. Available from [www.cochrane-handbook.org](http://www.cochrane-handbook.org).
2. Furukawa T A, Barbui C, Cipriani A, et al. Imputing missing standard deviations in meta-analyses can provide accurate results. *Journal of clinical epidemiology*, 2006, 59(1): 7-10.

### Weight loss at 12 months

Eight studies did not report the SDs in their report. Six studies (Bazzano, 2014; Foster GD, 2010; Aldana, 2007; Gardner, 2007; Rock, 2010; Jolly, 2011) reported 95% Confidence Intervals (CIs) of mean, we estimated the SDs from 95% CIs. One study (Iqbal, 2010) provided the error bars of mean change in Figure 2 of their report, we estimated the SD from graph. One study (Green, 2015) reported P value between experimental and control groups (P=0.03), we estimated the SD between groups from P value and used this to impute the missing SDs for both groups (degrees of freedom=87+81-2=166, obtained SD=2.19 by entering =tinv(0.03, 166) into a cell in a Microsoft Excel spreadsheet).

### Weight loss at 6 months

Twenty-one studies did not report the SDs. Fifteen studies (Ijzelenberg, 2012; Konstantinidou, 2010 ; Wardle, 2000; Bazzano, 2014; Foster GD, 2010; Yancy, 2004; Aldana, 2007; Gardner, 2007; Rock, 2010; Jolly, 2011; Jenkins, 2014; Liu, 2013; Veum, 2017; Ramprasath, 2014; Jenkins, 2017) reported 95% CIs of mean, we estimated the SDs from 95% CIs. One study (Iqbal, 2010) provided the error bars of mean change in Figure 2 of their report, we estimated SD from graph. One study (Green, 2015) reported P value between experimental and control groups (P=0.001), we estimated the SD between groups from P value and used to impute the missing SDs for both groups (degrees of freedom=93+85-2=178, obtained SD=3.35 by entering =tinv(0.001, 178) into a cell in a Microsoft Excel spreadsheet). We imputed the missing SDs of 4 studies (Blumenthal, 2010a; Dyson, 2007; Johnston, 2013; Lima, 2013) using the pooled SDs.

### SBP reduction at 12 months



Four studies did not report the SDs. Four of them (Bazzano, 2014; Foster GD, 2010; Aldana, 2007) reported 95% CIs of mean, we estimated the SDs from 95% CIs. We imputed the missing SDs for 1 studies (Green, 2015) using the pooled SDs.

#### **SBP reduction at 6 months**

Thirteen studies did not report the SDs. Nine of them (Konstantinidou, 2010; Blumenthal, 2010a; Bazzano, 2014; Foster GD, 2010; Yancy, 2004; Aldana, 2007; Liu, 2013; Ramprasath, 2014; Davis,2017) reported 95% CIs of mean, we estimated the SDs from 95% CIs. We imputed the missing SDs for 4 studies (Blumenthal, 2000; Lima, 2013; Samaha 03; Green, 2015) using the pooled SDs.

#### **DBP reduction at 12 months**

Four studies did not report the SDs. Four of them (Bazzano, 2014; Foster GD, 2010; Aldana, 2007) reported 95% CIs of mean, we estimated the SDs from 95% CIs. We imputed the missing SDs for 1 studies (Green, 2015) using the pooled SDs.

#### **DBP reduction at 6 months**

Fourteen studies did not report the SDs. Ten of them (Konstantinidou, 2010; Blumenthal, 2010a; Bazzano, 2014; Foster GD, 2010; Yancy, 2004; Aldana, 2007; Jenkins, 2014; Liu, 2013; Ramprasath, 2014; Davis,2017) reported 95% CIs of mean, we estimated the SDs from 95% CIs. We imputed the missing SDs for 4 studies (Blumenthal, 2000; Lima, 2013; Samaha 03; Green, 2015) using the pooled SDs.

#### **LDL reduction at 12 months**

Three studies did not report the SDs. Two of them (Foster GD, 2010; Aldana, 2007) reported 95% CIs of mean, we estimated the SDs from 95% CIs. We imputed the missing SDs for 1 studies (Green, 2015) using the pooled SDs.

#### **LDL reduction at 6 months**

Fifteen studies did not report the SDs. Nine of them (Wardle, 2000; Konstantinidou, 2010; Blumenthal, 2010a; Bazzano, 2014; Foster GD, 2010; Aldana, 2007; Rock, 2010; Jenkins, 2014; Ramprasath, 2014) reported 95% CIs of mean, we estimated the SDs from 95% CIs. We imputed the missing SDs for 6 studies (Austel, 2015; Dyson, 2007; Lasker, 2008; Yancy, 2004; Yang, 2016; Green, 2015) using the pooled SDs.

#### **HDL increase at 12 months**

Four studies (Bazzano, 2014; Foster GD, 2010; Aldana, 2007; Rock, 2010) reported 95% CIs of mean, we estimated the SDs from 95% CIs. We imputed the missing SDs for 1 studies (Green, 2015) using the pooled SDs.

#### **HDL increase at 6 months**

Seventeen studies did not report the SDs. 12 of them (Wardle, 2000; Konstantinidou, 2010; Blumenthal, 2010a; Bazzano, 2014; Foster GD, 2010; Aldana, 2007; Rock, 2010; Jenkins, 2014; Liu, 2013; Veum, 2017; Ramprasath, 2014; Yang, 2016) reported 95% CIs of mean, we estimated the

SDs from 95% CIs. We imputed the missing SDs for 5 studies (Austel, 2015; Dyson, 2007; Lasker, 2008; Yancy, 2004; Green, 2015) using the pooled SDs.

#### **CRP reduction at 12 months**

One studies (Bazzano, 2014) reported 95% CIs of mean, we estimated the SDs from 95% CIs. One reported IQR of median (Rock, 2010), we estimated the SDs from IQR.

#### **CRP reduction at 6 months**

Five studies (Konstantinidou, 2010; Bazzano, 2014; McAuley, 2005; Jenkins, 2014; Ramprasath, 2014) reported 95% CIs of mean, we estimated the SDs from 95% CIs. One reported IQR of median (Rock, 2010), we estimated the SDs from IQR.

### Text S3: Instructions for GRADE assessment

Our certainty of assessments addressed the following categories: risk of bias, imprecision, inconsistency, and indirectness. We did not assess for publication bias given the most popular diets were usually compared to an active control (low fat diet or another popular diet) and a limited number of popular diets were compared to usual diet as a control. In particular, only 2 of 136 comparison groups (Atkins versus Control-low fat, and Zone versus Control-low fat) had more than 10 studies. For both direct and indirect comparisons, the starting point for certainty in estimates was ‘high’. The certainty in indirect estimates was inferred from examination of the dominant lowest order loop. We identified the dominant lowest order loop by per comparison contribution matrix which could show the contribution percentage of each direct comparison to each indirect comparison. If more than one loop contributed similar power to the indirect estimate, we assumed that the grade of the indirect evidence started at the lowest grade within all similarly contributing loops. The certainty rating chosen was the lowest of the direct estimates contributing to the indirect comparison. For instance, consider a comparison of A versus B that is informed by A versus C and B versus C. If A versus C was rated as high certainty and B versus C as moderate certainty, the overall indirect certainty rating was moderate (moderate from the B versus C comparison). We considered further rating down each indirect comparison for intransitivity if the interventions or populations were dissimilar between the direct comparisons informing the dominant loop with respect to exercise, behavioral support (i.e. the loop that contributed most to the indirect estimate).

Network estimate certainty started with the certainty of evidence from the direct or indirect evidence that dominated the comparison. We considered rating down the certainty in the network estimate if there was incoherence between the indirect and direct estimates or if there was imprecision (wide credible intervals) around the treatment effect. When there was serious inconsistency, we used the estimates with the higher certainty of the direct and indirect evidence.

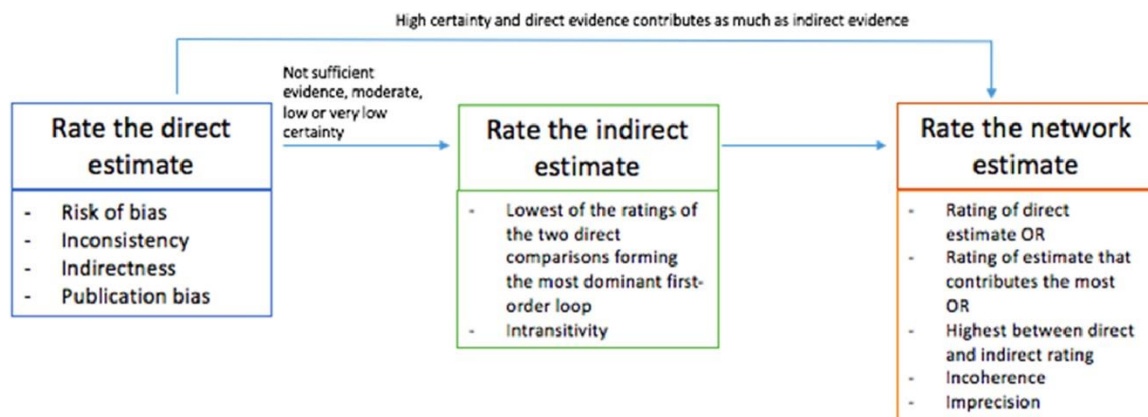

*Instruction for each domain:*

**Risk of Bias** – For each direct estimate, we rated down for risk of bias if studies with high risk of bias had contributed more to the overall effect estimate. If half the studies were at high risk and half at low risk, we assigned risk of bias based on the total number of patients randomized within

each risk of bias category. For example, if 2 studies are high risk with a total of 500 patients, while 2 studies are at low risk with a total of 300 patients, the risk of bias was high.

*Inconsistency/heterogeneity* – We assessed the inconsistency for each direct estimate by visually inspecting the distribution of point estimates and corresponding 95% credible intervals. We looked to see if the point estimates were in the same direction, similar in magnitude and we assessed if the estimates all fell within the widest 95% credible intervals.

*Publication bias*: not detectable.

*Indirectness* – for weight-loss comparisons, if the majority of participants enrolled included clinical populations, we rated down for indirectness. If we concluded that an active popular diet (Mediterranean) was of higher certainty evidence than another active diet (Atkins, DASH, Jenny Craig, Zone) and there was no direct comparison, we also rated down. For lipid markers, blood pressure and CRP comparisons, if the majority of studies enrolled patients with clinical conditions respective to the outcome of interest (e.g. high lipids, blood pressure), we rated down for indirectness.

*Intransitivity* – we assessed the intransitivity (the distribution of effect modifiers [exercise, behavioral support]) between comparisons that informed the direct comparisons for the indirect estimates. To do so, we looked at the league tables for adjusted and unadjusted estimates. If the point estimates were relatively the same, and the point estimates for each fell within the largest 95%CrI, we did not rate down.

*Imprecision* – Among all outcomes, we rated down for imprecision among direct estimates if there was a small sample size (less than 400 among continuous outcomes).

Weight loss: Among Indirect and network estimates, for active popular diets versus control or active versus active popular diet groups, we rated down for imprecision if the confidence interval crossed 1 kg.

For remaining CV risk outcomes: For active popular diets versus active diets or control groups, we rated down for imprecision if the confidence interval crossed our minimal important difference (MID). Based on consultation with cardiovascular experts and the literature, the MIDs were determined to be 2.5% for SBP and DBP, and 5% for LDL, HDL and CRP (Chaivaroli L et al. 2018).

|       | Normal    | 20% | 15% | 10% | 5%        | 2.5%    |
|-------|-----------|-----|-----|-----|-----------|---------|
| SBP   | 120 mm Hg | 24  | 18  | 12  | 6         | 3 (MID) |
| DBP   | 80 mm Hg  | 16  | 12  | 8   | 4         | 2 (MID) |
| LDL   | 100 mg/dL | 20  | 15  | 10  | 5 (MID)   | 2.5     |
| HDL ↑ | 40 mg/dL  | 8   | 6   | 4   | 2 (MID)   | 1       |
| CRP   | 10 mg/dL  | 2   | 1.5 | 1.0 | 0.5 (MID) | 0.25    |

SBP/DBP: 2mmHg - based on epidemiology in relation to stroke, MI, etc.

LDL and HDL: 5% or 0.1mmol/L - based on FDA/Health Canada cholesterol-lowering health claims for foods

CRP: 0.5mg/L - based on Reynolds Risk score 0.5mg/L = 1% change in 10y CVD risk

*GRADE certainty in estimates*

High certainty - Further research is very unlikely to change our certainty in the estimate of effect;

Moderate certainty - Further research is likely to have an important impact on our certainty in the estimate of effect and may change the estimate;

Low certainty - Further research is very likely to have an important impact on our certainty in the estimate of effect and is likely to change the estimate;

Very low certainty - Any estimate of effect is very uncertain.

## References

- (1) Guyatt GH, Oxman AD, Vist GE, et al. GRADE: an emerging consensus on rating quality of evidence and strength of recommendations. *BMJ (Clinical research ed)*. 2008;336(7650):924-926.
- (2) Puhan MA, Schunemann HJ, Murad MH, et al. A GRADE Working Group approach for rating the quality of treatment effect estimates from network meta-analysis. *BMJ (Clinical research ed)*. 2014;349:g5630.
- (3) Brignardello-Petersen R, Bonner A, Alexander PE, et al. Advances in the GRADE approach to rate the certainty in estimates from a network meta-analysis. *J Clin Epidemiol*. 2018;93:36-44.
- (4) Chaivaroli L et al. Portfolio Dietary Pattern and Cardiovascular Disease: A Systematic Review and Meta-analysis of Controlled Trials. *Progress in Cardiovascular Diseases* 2018; 61:43-53.

#### Text S4: The list of eligible studies

1. Abenavoli L, Greco M, Milic N, Accattato F, Foti D, Gulletta E, Luzza F. Effect of mediterranean diet and antioxidant formulation in non-alcoholic fatty liver disease: A randomized study. *Nutrients* 2017;9 (8) (no pagination)(870) doi: <http://dx.doi.org/10.3390/nu9080870>.
2. Ahern AL, Wheeler GM, Aveyard P, et al. Extended and standard duration weight-loss programme referrals for adults in primary care (WRAP): a randomised controlled trial. *The Lancet* 2017;389 (10085):2214-25. doi: <http://dx.doi.org/10.1016/S0140-6736%2817%2930647-5>.
3. Aldana SG, Greenlaw R, Salberg A, et al. The effects of an intensive lifestyle modification program on carotid artery intima-media thickness: a randomized trial. *Am J Health Promot* 2007;21(6):510-6. doi: 10.4278/0890-1171-21.6.510 [published Online First: 2007/08/07]
4. Appel LJ, Champagne CM, Harsha DW, et al. Effects of comprehensive lifestyle modification on blood pressure control: main results of the PREMIER clinical trial. *JAMA* 2003;289(16):2083-93.
5. Athyros VG KA, Papageorgiou AA, Tziomalos K, Peletidou A, Vosikis C, Karagiannis A, Mikhailidis DP. Effect of a plant stanol ester-containing spread, placebo spread, or Mediterranean diet on estimated cardiovascular risk and lipid, inflammatory and haemostatic factors. *Nutrition, metabolism, and cardiovascular diseases : NMCD* 2011;21(3):213-21.
6. Aude YW, Agatston AS, Lopez-Jimenez F, et al. The national cholesterol education program diet vs a diet lower in carbohydrates and higher in protein and monounsaturated fat: a randomized trial. *Arch Intern Med* 2004;164(19):2141-6. doi: 10.1001/archinte.164.19.2141 [published Online First: 2004/10/27]
7. Austel A, Ranke C, Wagner N, Gorge J, Ellrott T. Weight loss with a modified Mediterranean-type diet using fat modification: a randomized controlled trial. *European journal of clinical nutrition* 2015; 69(8): 878-84.
8. Azadi-Yazdi M, Karimi-Zarchi M, Salehi-Abargouei A, Fallahzadeh H, Nadjarzadeh A. Effects of Dietary Approach to Stop Hypertension diet on androgens, antioxidant status and body composition in overweight and obese women with polycystic ovary syndrome: a randomised controlled trial. *Journal of human nutrition and dietetics : the official journal of the British Dietetic Association* 2017; 30(3): 275-83.
9. Baetge C, Earnest CP, Lockard B, et al. Efficacy of a randomized trial examining commercial weight loss programs and exercise on metabolic syndrome in overweight and obese women. *Applied physiology, nutrition, and metabolism = Physiologie appliquee, nutrition et metabolisme* 2017; 42(2): 216-27.
10. Bazzano LA, Hu T, Reynolds K, et al. Effects of low-carbohydrate and low-fat diets: a randomized trial. *Annals of Internal Medicine* 2014;161(5):309-18.
11. Blumenthal JA, Babyak MA, Hinderliter A, et al. Effects of the DASH diet alone and in combination with exercise and weight loss on blood pressure and cardiovascular biomarkers in men and women with high blood pressure: the ENCORE study. *Archives of Internal Medicine* 2010;170(2):126-35. doi: 10.1001/archinternmed.2009.470
12. Blumenthal JA, Babyak MA, Sherwood A, et al. Effects of the dietary approaches to stop hypertension diet alone and in combination with exercise and caloric restriction on insulin sensitivity and lipids. *Hypertension* 2010;55(5):1199-205. doi: <http://dx.doi.org/10.1161/HYPERTENSIONAHA.109.149153>

13. Blumenthal JA, Sherwood A, Gullette EC, et al. Exercise and weight loss reduce blood pressure in men and women with mild hypertension: effects on cardiovascular, metabolic, and hemodynamic functioning. *Arch Intern Med* 2000;160(13):1947-58. [published Online First: 2000/07/11]
14. Brader L, Rejnmark L, Carlberg C, et al. Effects of a healthy Nordic diet on plasma 25-hydroxyvitamin D concentration in subjects with metabolic syndrome: a randomized, [corrected] controlled trial (SYSDIET). *European journal of nutrition* 2014;53(4):1123-34. doi: 10.1007/s00394-014-0674-3 [published Online First: 2014/02/27]
15. Brehm BJ, Seeley RJ, Daniels SR, et al. A randomized trial comparing a very low carbohydrate diet and a calorie-restricted low fat diet on body weight and cardiovascular risk factors in healthy women. *J Clin Endocrinol Metab* 2003;88(4):1617-23. doi: 10.1210/jc.2002-021480
16. Brehm BJ, Spang SE, Lattin BL, et al. The role of energy expenditure in the differential weight loss in obese women on low-fat and low-carbohydrate diets. *J Clin Endocrinol Metab* 2005;90(3):1475-82. doi: 10.1210/jc.2004-1540 [published Online First: 2004/12/16]
17. Brinkworth GD, Noakes M, Clifton PM, et al. Effects of a low carbohydrate weight loss diet on exercise capacity and tolerance in obese subjects. *Obesity (Silver Spring)* 2009;17(10):1916-23. doi: 10.1038/oby.2009.134 [published Online First: 2009/04/18]
18. Brinkworth GD, Noakes M, Keogh JB, et al. Long-term effects of a high-protein, low-carbohydrate diet on weight control and cardiovascular risk markers in obese hyperinsulinemic subjects. *Int J Obes Relat Metab Disord* 2004;28(5):661-70. doi: 10.1038/sj.ijo.0802617 [published Online First: 2004/03/10]
19. Brinkworth GD, Noakes M, Parker B, et al. Long-term effects of advice to consume a high-protein, low-fat diet, rather than a conventional weight-loss diet, in obese adults with type 2 diabetes: one-year follow-up of a randomised trial. *Diabetologia* 2004;47(10):1677-86. doi: 10.1007/s00125-004-1511-7 [published Online First: 2004/10/14]
20. Burke V, Beilin LJ, Cutt HE, et al. Effects of a lifestyle programme on ambulatory blood pressure and drug dosage in treated hypertensive patients: a randomized controlled trial. *J Hypertens* 2005;23(6):1241-9.
21. Collins CE, Morgan PJ, Jones P, et al. Evaluation of a commercial web-based weight loss and weight loss maintenance program in overweight and obese adults: a randomized controlled trial. *BMC Public Health* 2010;10:669. doi: 10.1186/1471-2458-10-669
22. Daly ME, Paisey R, Paisey R, et al. Short-term effects of severe dietary carbohydrate-restriction advice in Type 2 diabetes--a randomized controlled trial. *Diabet Med* 2006;23(1):15-20. doi: 10.1111/j.1464-5491.2005.01760.x [published Online First: 2006/01/18]
23. Dansinger ML, Gleason JA, Griffith JL, et al. Comparison of the Atkins, Ornish, Weight Watchers, and Zone diets for weight loss and heart disease risk reduction: a randomized trial. *JAMA* 2005;293(1):43-53. doi: 10.1001/jama.293.1.43 [published Online First: 2005/01/06]
24. Das SK, Gilhooly CH, Golden JK, et al. Long-term effects of 2 energy-restricted diets differing in glycemic load on dietary adherence, body composition, and metabolism in CALERIE: a 1-y randomized controlled trial. *Am J Clin Nutr* 2007;85(4):1023-30. doi: 10.1093/ajcn/85.4.1023 [published Online First: 2007/04/07]
25. Davis CR, Bryan J, Hodgson JM, Woodman R, Murphy KJ. A Mediterranean Diet Reduces F2-Isoprostanes and Triglycerides among Older Australian Men and Women after 6 Months. *Journal of Nutrition* 2017;147(7):1348-55. doi: <https://dx.doi.org/10.3945/jn.117.248419>

26. Davis NJ, Tomuta N, Schechter C, et al. Comparative study of the effects of a 1-year dietary intervention of a low-carbohydrate diet versus a low-fat diet on weight and glycemic control in type 2 diabetes. *Diabetes Care* 2009;32(7):1147-52. doi: 10.2337/dc08-2108 [published Online First: 2009/04/16]
27. de la Iglesia R, Lopez-Legarrea P, Abete I, et al. A new dietary strategy for long-term treatment of the metabolic syndrome is compared with the American Heart Association (AHA) guidelines: the MEtabolic Syndrome REduction in NAvarra (RESMENA) project. *Br J Nutr* 2014;111(4):643-52. doi: 10.1017/s0007114513002778
28. de Lorgeril M, Renaud S, Mamelle N, et al. Mediterranean alpha-linolenic acid-rich diet in secondary prevention of coronary heart disease.[Erratum appears in *Lancet* 1995 Mar 18;345(8951):738]. *Lancet* 1994;343(8911):1454-9.
29. Djuric Z, DiLaura NM, Jenkins I, et al. Combining weight-loss counseling with the weight watchers plan for obese breast cancer survivors. *Obes Res* 2002;10(7):657-65. doi: 10.1038/oby.2002.89 [published Online First: 2002/07/10]
30. Droste DW, Iliescu C, Vaillant M, et al. A daily glass of red wine and lifestyle changes do not affect arterial blood pressure and heart rate in patients with carotid arteriosclerosis after 4 and 20 weeks. *Cerebrovasc* 2013;3(1):121-9. doi: <http://dx.doi.org/10.1159/000354847>
31. Dunn SL, Siu W, Freund J, et al. The effect of a lifestyle intervention on metabolic health in young women. *Diabetes Metab Syndr Obes* 2014;7:437-44. doi: <http://dx.doi.org/10.2147/DMSO.S67845>
32. Dyson PA, Beatty S, Matthews DR. A low-carbohydrate diet is more effective in reducing body weight than healthy eating in both diabetic and non-diabetic subjects. *Diabetic Medicine* 2007;24(12):1430-5.
33. Ebbeling CB, Leidig MM, Feldman HA, et al. Effects of a low-glycemic load vs low-fat diet in obese young adults: a randomized trial. *JAMA* 2007;297(19):2092-102. doi: 10.1001/jama.297.19.2092 [published Online First: 2007/05/18]
34. Edwards KM, Wilson KL, Sadjia J, et al. Effects on blood pressure and autonomic nervous system function of a 12-week exercise or exercise plus DASH-diet intervention in individuals with elevated blood pressure. *Acta Physiol (Oxf)* 2011;203(3):343-50. doi: <http://dx.doi.org/10.1111/j.1748-1716.2011.02329.x>
35. Elhayany A, Lustman A, Abel R, et al. A low carbohydrate Mediterranean diet improves cardiovascular risk factors and diabetes control among overweight patients with type 2 diabetes mellitus: a 1-year prospective randomized intervention study. *Diabetes Obes Metab* 2010;12(3):204-9. doi: <http://dx.doi.org/10.1111/j.1463-1326.2009.01151.x>
36. Ello-Martin JA, Roe LS, Ledikwe JH, et al. Dietary energy density in the treatment of obesity: a year-long trial comparing 2 weight-loss diets. *Am J Clin Nutr* 2007;85(6):1465-77. doi: 10.1093/ajcn/85.6.1465 [published Online First: 2007/06/09]
37. Epstein DE, Sherwood A, Smith PJ, et al. Determinants and consequences of adherence to the dietary approaches to stop hypertension diet in African-American and white adults with high blood pressure: results from the ENCORE trial. *J Acad Nutr Diet* 2012;112(11):1763-73. doi: 10.1016/j.jand.2012.07.007
38. Esposito K MM, Ciotola M, Di Palo C, Scognamiglio P, Gicchino M, Petrizzo M, Saccomanno F, Beneduce F, Ceriello A, Giugliano D. Effects of a Mediterranean-style diet on the need for



- antihyperglycemic drug therapy in patients with newly diagnosed type 2 diabetes: a randomized trial. *Annals of Internal Medicine* 2009;151(5):306-14.
39. Farnsworth E, Luscombe ND, Noakes M, et al. Effect of a high-protein, energy-restricted diet on body composition, glycemic control, and lipid concentrations in overweight and obese hyperinsulinemic men and women. *Am J Clin Nutr* 2003;78(1):31-9. doi: 10.1093/ajcn/78.1.31
40. Fito M, Estruch R, Salas-Salvado J, et al. Effect of the Mediterranean diet on heart failure biomarkers: a randomized sample from the PREDIMED trial. *European journal of heart failure* 2014; 16(5): 543-50.
41. Foraker RE, Pennell M, Sprangers P, et al. Effect of a low-fat or low-carbohydrate weight-loss diet on markers of cardiovascular risk among premenopausal women: a randomized trial. *J Womens Health (Larchmt)* 2014;23(8):675-80. doi: <http://dx.doi.org/10.1089/jwh.2013.4638>
42. Foroozafard F, Rafiei H, Samimi M, et al. The effects of dietary approaches to stop hypertension diet on weight loss, anti-Mullerian hormone and metabolic profiles in women with polycystic ovary syndrome: A randomized clinical trial. *Clinical endocrinology* 2017; 87(1): 51-8.
43. Foster GD, Wyatt HR, Hill JO, et al. Weight and metabolic outcomes after 2 years on a low-carbohydrate versus low-fat diet: a randomized trial. *Ann Intern Med* 2010;153(3):147-57. doi: 10.7326/0003-4819-153-3-201008030-00005 [published Online First: 2010/08/04]
44. Foster GD, Wyatt HR, Hill JO, et al. A randomized trial of a low-carbohydrate diet for obesity. *N Engl J Med* 2003;348(21):2082-90. doi: 10.1056/NEJMoa022207 [published Online First: 2003/05/23]
45. Frisch S, Zittermann A, Berthold HK, et al. A randomized controlled trial on the efficacy of carbohydrate-reduced or fat-reduced diets in patients attending a telemedically guided weight loss program. *Cardiovascular Diabetology* 2009;8(36)
46. Galletly C, Moran L, Noakes M, et al. Psychological benefits of a high-protein, low-carbohydrate diet in obese women with polycystic ovary syndrome--a pilot study. *Appetite* 2007;49(3):590-3. doi: 10.1016/j.appet.2007.03.222 [published Online First: 2007/05/19]
47. Garcia-Toro M, Gili M, Ibarra O, et al. Metabolic syndrome improvement in depression six months after prescribing simple hygienic-dietary recommendations. *BMC Res Notes* 2014;7:339. doi: <http://dx.doi.org/10.1186/1756-0500-7-339>
48. Gardner CD, Kiazand A, Alhassan S, et al. Comparison of the Atkins, Zone, Ornish, and LEARN diets for change in weight and related risk factors among overweight premenopausal women: the A TO Z Weight Loss Study: a randomized trial. *JAMA* 2007;297(9):969-77. doi: 10.1001/jama.297.9.969 [published Online First: 2007/03/08]
49. Goodrick GK, Poston WS, 2nd, Kimball KT, et al. Nondietering versus dieting treatment for overweight binge-eating women. *J Consult Clin Psychol* 1998;66(2):363-8. [published Online First: 1998/05/16]
50. Green C, Janoff S, Yarborough B, et al. A 12-Week Weight Reduction Intervention for Overweight Individuals Taking Antipsychotic Medications. *Community Mental Health Journal* 2014;50(8):974-80. doi: 10.1007/s10597-014-9716-9
51. Green CA, Yarborough BJ, Leo MC, et al. The STRIDE weight loss and lifestyle intervention for individuals taking antipsychotic medications: A randomized trial. *American Journal of Psychiatry* 2015;172(1):71-81. doi: <http://dx.doi.org/10.1176/appi.ajp.2014.14020173>
52. Guldbbrand H, Dizdar B, Bunjaku B, et al. In type 2 diabetes, randomisation to advice to follow a low-carbohydrate diet transiently improves glycaemic control compared with advice to follow

- a low-fat diet producing a similar weight loss. *Diabetologia* 2012;55(8):2118-27. doi: 10.1007/s00125-012-2567-4 [published Online First: 2012/05/09]
53. Guldbrand H, Lindstrom T, Dizdar B, et al. Randomization to a low-carbohydrate diet advice improves health related quality of life compared with a low-fat diet at similar weight-loss in Type 2 diabetes mellitus. *Diabetes research and clinical practice* 2014; **106**(2): 221-7.
54. Haufe S, Engeli S, Kast P, et al. Randomized comparison of reduced fat and reduced carbohydrate hypocaloric diets on intrahepatic fat in overweight and obese human subjects. *Hepatology (Baltimore, Md)* 2011;53(5):1504-14.
55. Haufe S, Utz W, Engeli S, et al. Left ventricular mass and function with reduced-fat or reduced-carbohydrate hypocaloric diets in overweight and obese subjects. *Hypertension* 2012;59(1):70-5.
56. Heshka S, Anderson JW, Atkinson RL, et al. Weight loss with self-help compared with a structured commercial program: a randomized trial. *JAMA* 2003;289(14):1792-8. doi: 10.1001/jama.289.14.1792 [published Online First: 2003/04/10]
57. Heshka S, Greenway F, Anderson JW, et al. Self-help weight loss versus a structured commercial program after 26 weeks: a randomized controlled study. *Am J Med* 2000;109(4):282-7. [published Online First: 2000/09/21]
58. Hill AM, Harris Jackson KA, Roussel MA, West SG, Kris-Etherton PM. Type and amount of dietary protein in the treatment of metabolic syndrome: a randomized controlled trial. *The American journal of clinical nutrition* 2015; **102**(4): 757-70.
59. Ijzelenberg W, Hellems IM, van Tulder MW, et al. The effect of a comprehensive lifestyle intervention on cardiovascular risk factors in pharmacologically treated patients with stable cardiovascular disease compared to usual care: a randomised controlled trial. *BMC Cardiovasc Disord* 2012;12:71. doi: <http://dx.doi.org/10.1186/1471-2261-12-71>
60. Iqbal N, Vetter ML, Moore RH, et al. Effects of a low-intensity intervention that prescribed a low-carbohydrate vs. a low-fat diet in obese, diabetic participants. *Obesity (Silver Spring)* 2010;18(9):1733-8. doi: 10.1038/oby.2009.460
61. Jebb SA, Ahern AL, Olson AD, et al. Primary care referral to a commercial provider for weight loss treatment versus standard care: a randomised controlled trial. *Lancet* 2011;378(9801):1485-92. doi: 10.1016/S0140-6736(11)61344-5 [published Online First: 2011/09/13]
62. Jen KL, Djuric Z, DiLaura NM, et al. Improvement of metabolism among obese breast cancer survivors in differing weight loss regimens. *Obes Res* 2004;12(2):306-12. doi: 10.1038/oby.2004.38
63. Jenkins DJ, Jones PJ, Lamarche B, et al. Effect of a dietary portfolio of cholesterol-lowering foods given at 2 levels of intensity of dietary advice on serum lipids in hyperlipidemia: a randomized controlled trial. *JAMA* 2011;306(8):831-9. doi: 10.1001/jama.2011.1202
64. Jenkins DJ, Wong JM, Kendall CW, et al. Effect of a 6-month vegan low-carbohydrate ('Eco-Atkins') diet on cardiovascular risk factors and body weight in hyperlipidaemic adults: a randomised controlled trial. *BMJ open* 2014;4(2):e003505. doi: 10.1136/bmjopen-2013-003505 [published Online First: 2014/02/07]
65. Johnston CA, Rost S, Miller-Kovach K, et al. A randomized controlled trial of a community-based behavioral counseling program. *Am J Med* 2013;126(12):1143.e19-24. doi: 10.1016/j.amjmed.2013.04.025 [published Online First: 2013/10/19]

66. Jolly K, Lewis A, Beach J, et al. Comparison of range of commercial or primary care led weight reduction programmes with minimal intervention control for weight loss in obesity: lighten Up randomised controlled trial. *BMJ* 2011;343:d6500. doi: 10.1136/bmj.d6500 [published Online First: 2011/11/05]
67. Kafeshani M, Mohsen J, Salehi R, Kazemi M, Entezari MH. Dietary approaches to stop hypertension influence on insulin receptor substrate-1 gene expression: A randomized controlled clinical trial. *Journal of Research in Medical Sciences* 2015;20(9):832-37.
68. Kitabchi AE, McDaniel KA, Wan JY, et al. Effects of high-protein versus high-carbohydrate diets on markers of [beta]-cell function, oxidative stress, lipid peroxidation, proinflammatory cytokines, and adipokines in obese, premenopausal women without diabetes: a randomized controlled trial. *Diabetes Care* 2013;36(7):1919-25.
69. Konstantinidou V, Covas M-I, Munoz-Aguayo D, et al. In vivo nutrigenomic effects of virgin olive oil polyphenols within the frame of the Mediterranean diet: a randomized controlled trial. *Faseb J* 2010;24(7):2546-57. doi: <http://dx.doi.org/10.1096/fj.09-148452>
70. Landers P, Wolfe MM, Glore S, et al. Effect of weight loss plans on body composition and diet duration. *J Okla State Med Assoc* 2002;95(5):329-31.
71. Lasker DA, Evans EM, Layman DK. Moderate carbohydrate, moderate protein weight loss diet reduces cardiovascular disease risk compared to high carbohydrate, low protein diet in obese adults: A randomized clinical trial. *Nutr Metab (Lond)* 2008;5:30. doi: 10.1186/1743-7075-5-30 [published Online First: 2008/11/08]
72. Layman DK, Boileau RA, Erickson DJ, et al. A reduced ratio of dietary carbohydrate to protein improves body composition and blood lipid profiles during weight loss in adult women. *J Nutr* 2003;133(2):411-7. doi: 10.1093/jn/133.2.411
73. Layman DK, Evans E, Baum JI, et al. Dietary protein and exercise have additive effects on body composition during weight loss in adult women. *J Nutr* 2005;135(8):1903-10. doi: 10.1093/jn/135.8.1903 [published Online First: 2005/07/28]
74. Layman DK, Evans EM, Erickson D, et al. A moderate-protein diet produces sustained weight loss and long-term changes in body composition and blood lipids in obese adults. *J Nutr* 2009;139(3):514-21. doi: 10.3945/jn.108.099440 [published Online First: 2009/01/23]
75. Lim SS, Noakes M, Keogh JB, et al. Long-term effects of a low carbohydrate, low fat or high unsaturated fat diet compared to a no-intervention control. *Nutrition, metabolism, and cardiovascular diseases : NMCD* 2010;20(8):599-607.
76. Lima STRM, da Silva Nalin de Souza B, Franca AKT, et al. Dietary approach to hypertension based on low glycaemic index and principles of DASH (Dietary Approaches to Stop Hypertension): a randomised trial in a primary care service. *Br J Nutr* 2013;110(8):1472-9. doi: <http://dx.doi.org/10.1017/S0007114513000718>
77. Lindeberg S, Jonsson T, Granfeldt Y, et al. A Palaeolithic diet improves glucose tolerance more than a Mediterranean-like diet in individuals with ischaemic heart disease. *Diabetologia* 2007;50(9):1795-807.
78. Liu X, Zhang G, Ye X, et al. Effects of a low-carbohydrate diet on weight loss and cardiometabolic profile in Chinese women: a randomised controlled feeding trial. *Br J Nutr* 2013;110(8):1444-53. doi: 10.1017/S0007114513000640
79. Luscombe ND, Clifton PM, Noakes M, et al. Effect of a high-protein, energy-restricted diet on weight loss and energy expenditure after weight stabilization in hyperinsulinemic subjects. *Int J*

Obes Relat Metab Disord 2003;27(5):582-90. doi: 10.1038/sj.ijo.0802270 [published Online First: 2003/04/22]

80. Luscombe ND, Clifton PM, Noakes M, et al. Effects of energy-restricted diets containing increased protein on weight loss, resting energy expenditure, and the thermic effect of feeding in type 2 diabetes. *Diabetes Care* 2002;25(4):652-7. [published Online First: 2002/03/29]
81. Ma J, Strub P, Lv N, et al. Pilot randomised trial of a healthy eating behavioural intervention in uncontrolled asthma. *Eur Respir J* 2016;47(1):122-32. doi: 10.1183/13993003.00591-2015
82. Marrero DG, Palmer KN, Phillips EO, Miller-Kovach K, Foster GD, Saha CK. Comparison of Commercial and Self-Initiated Weight Loss Programs in People With Prediabetes: A Randomized Control Trial. *American journal of public health* 2016; 106(5): 949-56.
83. McAuley KA, Hopkins CM, Smith KJ, et al. Comparison of high-fat and high-protein diets with a high-carbohydrate diet in insulin-resistant obese women. *Diabetologia* 2005;48(1):8-16. doi: 10.1007/s00125-004-1603-4 [published Online First: 2004/12/24]
84. McManus K, Antinoro L, Sacks F. A randomized controlled trial of a moderate-fat, low-energy diet compared with a low fat, low-energy diet for weight loss in overweight adults. *International Journal of Obesity & Related Metabolic Disorders: Journal of the International Association for the Study of Obesity* 2001;25(10):1503-11.
85. Mekki K, Bouzidi-bekada N, Kaddous A, et al. Mediterranean diet improves dyslipidemia and biomarkers in chronic renal failure patients. *Food Funct* 2010;1(1):110-5. doi: <http://dx.doi.org/10.1039/c0fo00032a>
86. Mellberg C, Sandberg S, Ryberg M, et al. Long-term effects of a Palaeolithic-type diet in obese postmenopausal women: a 2-year randomized trial. *Eur J Clin Nutr* 2014;68(3):350-7. doi: 10.1038/ejcn.2013.290 [published Online First: 2014/01/30]
87. Michalsen A, Lehmann N, Pithan C, et al. Mediterranean diet has no effect on markers of inflammation and metabolic risk factors in patients with coronary artery disease. *Eur J Clin Nutr* 2006;60(4):478-85.
88. Morgan LM, Griffin BA, Millward DJ, et al. Comparison of the effects of four commercially available weight-loss programmes on lipid-based cardiovascular risk factors. *Public Health Nutr* 2009;12(6):799-807. doi: 10.1017/S1368980008003236 [published Online First: 2008/07/24]
89. Nowson CA, Wattanapenpaiboon N, Pachett A. Low-sodium Dietary Approaches to Stop Hypertension-type diet including lean red meat lowers blood pressure in postmenopausal women. *Nutr Res* 2009;29(1):8-18. doi: <http://dx.doi.org/10.1016/j.nutres.2008.12.002>
90. Nowson CA, Worsley A, Margerison C, et al. Blood pressure change with weight loss is affected by diet type in men. *American Journal of Clinical Nutrition* 2005;81(5):983-9.
91. O'Neil PM, Miller-Kovach K, Tuerk PW, et al. Randomized controlled trial of a nationally available weight control program tailored for adults with type 2 diabetes. *Obesity (Silver Spring, Md)* 2016; 24(11): 2269-77.
92. Ornish D, Brown SE, Scherwitz LW, et al. Can lifestyle changes reverse coronary heart disease? The Lifestyle Heart Trial. *Lancet (London, England)* 1990;336(8708):129-33.
93. Panunzio MF, Caporizzi R, Antoniciello A, et al. Randomized, controlled nutrition education trial promotes a Mediterranean diet and improves anthropometric, dietary, and metabolic parameters in adults. *Ann Ig* 2011;23(1):13-25.
94. Papandreou C, Schiza SE, Bouloukaki I, et al. Effect of Mediterranean diet versus prudent diet combined with physical activity on OSAS: a randomised trial. *Eur Respir J* 2012;39(6):1398-404. doi: <http://dx.doi.org/10.1183/09031936.00103411>

95. Papandreou C, Schiza SE, Tzatzarakis MN, et al. Effect of Mediterranean diet on lipid peroxidation marker TBARS in obese patients with OSAHS under CPAP treatment: a randomised trial. *Sleep Breath* 2012;16(3):873-9. doi: <http://dx.doi.org/10.1007/s11325-011-0589-7>
96. Parker B, Noakes M, Luscombe N, et al. Effect of a high-protein, high-monounsaturated fat weight loss diet on glycemic control and lipid levels in type 2 diabetes. *Diabetes Care* 2002;25(3):425-30.
97. Pinto AM, Fava JL, Hoffmann DA, et al. Combining behavioral weight loss treatment and a commercial program: a randomized clinical trial. *Obesity (Silver Spring)* 2013;21(4):673-80. doi: 10.1002/oby.20044 [published Online First: 2013/02/14]
98. Racine EF, Lyerly J, Troyer JL, et al. The influence of home-delivered dietary approaches to stop hypertension meals on body mass index, energy intake, and percent of energy needs consumed among older adults with hypertension and/or hyperlipidemia. *J Acad Nutr Diet* 2012;112(11):1755-62. doi: <http://dx.doi.org/10.1016/j.jand.2012.06.358>
99. Ramprasath VR, Jenkins DJ, Lamarche B, et al. Consumption of a dietary portfolio of cholesterol lowering foods improves blood lipids without affecting concentrations of fat soluble compounds. *Nutrition journal* 2014; 13: 101.
100. Rippe JM, Price JM, Hess SA, et al. Improved psychological well-being, quality of life, and health practices in moderately overweight women participating in a 12-week structured weight loss program. *Obes Res* 1998;6(3):208-18. [published Online First: 1998/06/09]
101. Rock CL, Flatt SW, Pakiz B, et al. Weight loss, glycemic control, and cardiovascular disease risk factors in response to differential diet composition in a weight loss program in type 2 diabetes: a randomized controlled trial. *Diabetes Care* 2014;37(6):1573-80. doi: <http://dx.doi.org/10.2337/dc13-2900>
102. Rock CL, Flatt SW, Sherwood NE, et al. Effect of a free prepared meal and incentivized weight loss program on weight loss and weight loss maintenance in obese and overweight women: a randomized controlled trial. *JAMA* 2010;304(16):1803-10. doi: 10.1001/jama.2010.1503 [published Online First: 2010/10/12]
103. Rock CL, Pakiz B, Flatt SW, et al. Randomized trial of a multifaceted commercial weight loss program. *Obesity (Silver Spring)* 2007;15(4):939-49. doi: 10.1038/oby.2007.614 [published Online First: 2007/04/12]
104. Ruth MR, Port AM, Shah M, et al. Consuming a hypocaloric high fat low carbohydrate diet for 12 weeks lowers C-reactive protein, and raises serum adiponectin and high density lipoprotein-cholesterol in obese subjects. *Metabolism* 2013;62(12):1779-87. doi: 10.1016/j.metabol.2013.07.006 [published Online First: 2013/10/01]
105. Sacks FM, Bray GA, Carey VJ, et al. Comparison of weight-loss diets with different compositions of fat, protein, and carbohydrates. *The New England journal of medicine* 2009;360(9):859-73.
106. Salas-Salvado J, Fernandez-Ballart J, Ros E, et al. Effect of a Mediterranean diet supplemented with nuts on metabolic syndrome status: one-year results of the PREDIMED randomized trial. *Archives of Internal Medicine* 2008;168(22):2449-58. doi: <http://dx.doi.org/10.1001/archinte.168.22.2449>
107. Samaha FF, Iqbal N, Seshadri P, et al. A low-carbohydrate as compared with a low-fat diet in severe obesity. *N Engl J Med* 2003;348(21):2074-81. doi: 10.1056/NEJMoa022637 [published Online First: 2003/05/23]

108. Saslow LR, Kim S, Daubenmier JJ, et al. A randomized pilot trial of a moderate carbohydrate diet compared to a very low carbohydrate diet in overweight or obese individuals with type 2 diabetes mellitus or prediabetes. *PLoS ONE* 2014;9(4):e91027. doi: <http://dx.doi.org/10.1371/journal.pone.0091027>
109. Sexton P, Black P, Metcalf P, et al. Influence of mediterranean diet on asthma symptoms, lung function, and systemic inflammation: a randomized controlled trial. *Journal of Asthma* 2013;50(1):75-81.
110. Shai I, Schwarzfuchs D, Henkin Y, et al. Weight Loss with a Low-Carbohydrate, Mediterranean, or Low-Fat Diet. *New England Journal of Medicine* 2008;359(3):229-41. doi: [doi:10.1056/NEJMoa0708681](https://doi.org/10.1056/NEJMoa0708681)
111. Skoldstam L, Hagfors L, Johansson G. An experimental study of a Mediterranean diet intervention for patients with rheumatoid arthritis. *Annals of the Rheumatic Diseases* 2003;62(3):208-14.
112. Stachowska E WT, Olszewska M, Safranow K, Millo B, Domanski L, Jakubowska K, Ciechanowski K, Chlubek D. Elements of Mediterranean diet improve oxidative status in blood of kidney graft recipients. *Br J Nutr* 2005;93(3):345-52.
113. Stachowska E WT, Safranow K, Domanski L, Rac M, Dziedziejko V, Ciechanowski K, Chlubek D. Simple dietary interventions reduce the risk factors of atherosclerosis in renal graft recipients. *Journal of Renal Nutrition* 2005;15(3):291-7.
114. Stern L, Iqbal N, Seshadri P, et al. The effects of low-carbohydrate versus conventional weight loss diets in severely obese adults: one-year follow-up of a randomized trial. *Ann Intern Med* 2004;140(10):778-85. [published Online First: 2004/05/19]
115. Svetkey LP, Pollak KI, Yancy WS, Jr., et al. Hypertension improvement project: randomized trial of quality improvement for physicians and lifestyle modification for patients. *Hypertension* 2009;54(6):1226-33. doi: <http://dx.doi.org/10.1161/HYPERTENSIONAHA.109.134874>
116. Tay J, Brinkworth GD, Noakes M, et al. Metabolic effects of weight loss on a very-low-carbohydrate diet compared with an isocaloric high-carbohydrate diet in abdominally obese subjects. *J Am Coll Cardiol* 2008;51(1):59-67. doi: [10.1016/j.jacc.2007.08.050](https://doi.org/10.1016/j.jacc.2007.08.050) [published Online First: 2008/01/05]
117. Thomson CA, Stopeck AT, Bea JW, et al. Changes in body weight and metabolic indexes in overweight breast cancer survivors enrolled in a randomized trial of low-fat vs. reduced carbohydrate diets. *Nutr Cancer* 2010;62(8):1142-52. doi: [10.1080/01635581.2010.513803](https://doi.org/10.1080/01635581.2010.513803) [published Online First: 2010/11/09]
118. Toobert DJ, Glasgow RE, Strycker LA, et al. Biologic and quality-of-life outcomes from the Mediterranean Lifestyle Program: a randomized clinical trial. *Diabetes Care* 2003;26(8):2288-93.
119. Truby H, Baic S, deLooy A, et al. Randomised controlled trial of four commercial weight loss programmes in the UK: initial findings from the BBC "diet trials". *BMJ* 2006;332(7553):1309-14. doi: [10.1136/bmj.38833.411204.80](https://doi.org/10.1136/bmj.38833.411204.80) [published Online First: 2006/05/25]
120. Tuttle KR SL, Packard DP, Milton JE, Daratha KB, Bibus DM, Short RA. Comparison of low-fat versus Mediterranean-style dietary intervention after first myocardial infarction (from The Heart Institute of Spokane Diet Intervention and Evaluation Trial). *American Journal of Cardiology* 2008;101(11):1523-30.

121. Uusitupa M, Hermansen K, Savolainen MJ, et al. Effects of an isocaloric healthy Nordic diet on insulin sensitivity, lipid profile and inflammation markers in metabolic syndrome -- a randomized study (SYSDIET). *J Intern Med* 2013;274(1):52-66. doi: 10.1111/joim.12044
122. Veum VL, Laupsa-Borge J, Eng O, et al. Visceral adiposity and metabolic syndrome after very high-fat and low-fat isocaloric diets: a randomized controlled trial. *The American journal of clinical nutrition* 2017; **105**(1): 85-99.
123. Vincent-Baudry S, Defoort C, Gerber M, et al. The Medi-RIVAGE study: reduction of cardiovascular disease risk factors after a 3-mo intervention with a Mediterranean-type diet or a low-fat diet. *American Journal of Clinical Nutrition* 2005;82(5):964-71.
124. Volek JS, Ballard KD, Silvestre R, et al. Effects of dietary carbohydrate restriction versus low-fat diet on flow-mediated dilation. *Metabolism* 2009;58(12):1769-77. doi: 10.1016/j.metabol.2009.06.005 [published Online First: 2009/07/28]
125. Volek JS, Phinney SD, Forsythe CE, et al. Carbohydrate restriction has a more favorable impact on the metabolic syndrome than a low fat diet. *Lipids* 2009;44(4):297-309. doi: 10.1007/s11745-008-3274-2 [published Online First: 2008/12/17]
126. Wadden TA, Foster GD, Sarwer DB, et al. Dieting and the development of eating disorders in obese women: results of a randomized controlled trial. *Am J Clin Nutr* 2004;80(3):560-8. doi: 10.1093/ajcn/80.3.560 [published Online First: 2004/08/24]
127. Wardle J, Rogers P, Judd P, et al. Randomized trial of the effects of cholesterol-lowering dietary treatment on psychological function. *American Journal of Medicine* 2000;108(7):547-53.
128. Westman EC, Yancy WS, Jr., Mavropoulos JC, et al. The effect of a low-carbohydrate, ketogenic diet versus a low-glycemic index diet on glycemic control in type 2 diabetes mellitus. *Nutr Metab (Lond)* 2008;5:36. doi: 10.1186/1743-7075-5-36 [published Online First: 2008/12/23]
129. Westman EC, Yancy WS, Jr., Olsen MK, et al. Effect of a low-carbohydrate, ketogenic diet program compared to a low-fat diet on fasting lipoprotein subclasses. *Int J Cardiol* 2006;110(2):212-6. doi: 10.1016/j.ijcard.2005.08.034
130. Whitt-Glover MC HJ, Foy CG, Quandt SA, Vitolins MZ, Leng I, Hornbuckle LM, Sanya KA, Bertoni AG. Translating the Dietary Approaches to Stop Hypertension (DASH) diet for use in underresourced, urban African American communities, 2010. *Preventing Chronic Disease* 2013;10(120088)
131. Wing RR, Venditti E, Jakicic JM, et al. Lifestyle intervention in overweight individuals with a family history of diabetes. *Diabetes Care* 1998;21(3):350-9.
132. Womble LG, Wadden TA, McGuckin BG, et al. A randomized controlled trial of a commercial internet weight loss program. *Obes Res* 2004;12(6):1011-8. doi: 10.1038/oby.2004.124 [published Online First: 2004/07/02]
133. Wycherley TP, Brinkworth GD, Clifton PM, et al. Comparison of the effects of 52 weeks weight loss with either a high-protein or high-carbohydrate diet on body composition and cardiometabolic risk factors in overweight and obese males. *Nutr Diabetes* 2012;2:e40. doi: <http://dx.doi.org/10.1038/nutd.2012.11>
134. Wycherley TP, Buckley JD, Noakes M, Clifton PM, Brinkworth GD. Long-term effects of a very low-carbohydrate weight loss diet on exercise capacity and tolerance in overweight and obese adults. *Journal of the American College of Nutrition* 2014; **33**(4): 267-73.

135. Yamada Y, Uchida J, Izumi H, et al. A non-calorie-restricted low-carbohydrate diet is effective as an alternative therapy for patients with type 2 diabetes. *Intern Med* 2014;53(1):13-9.
136. Yancy WS, Jr., Olsen MK, Guyton JR, et al. A low-carbohydrate, ketogenic diet versus a low-fat diet to treat obesity and hyperlipidemia: a randomized, controlled trial. *Ann Intern Med* 2004;140(10):769-77. [published Online First: 2004/05/19]
137. Yang Z, Yu Z, Jiang Y, et al. Evaluation of a community-based behavioral weight loss program in Chinese adults: A randomized controlled trial. *Obesity (Silver Spring, Md)* 2016; **24**(7): 1464-70.



Table S1: The characteristics of eligible dietary program study interventions

| <b>Dietary program*</b> | <b>Calorie &amp; macronutrient recommendations</b>                                                                                                                                                                                                                                                                                                                                                                                                                                                                                                                                                                                           | <b>Exercise recommendations</b>                                                                                                               | <b>Behavioral supports</b>                                                                                                                                                                                                                                                                      | <b>Other co-interventions</b>                                                                                                                      |
|-------------------------|----------------------------------------------------------------------------------------------------------------------------------------------------------------------------------------------------------------------------------------------------------------------------------------------------------------------------------------------------------------------------------------------------------------------------------------------------------------------------------------------------------------------------------------------------------------------------------------------------------------------------------------------|-----------------------------------------------------------------------------------------------------------------------------------------------|-------------------------------------------------------------------------------------------------------------------------------------------------------------------------------------------------------------------------------------------------------------------------------------------------|----------------------------------------------------------------------------------------------------------------------------------------------------|
| <i>Atkins</i>           | Though several studies incorporating this diet program did not recommend a specific caloric intake, among those that did the daily intake ranged from 1400-2200 and 1200-1600 calories for males and females, respectively. This program was often based on an Atkins manual, and typically involved an initial induction phase in which carbohydrates (CHO), proteins and fats were, respectively, 4-5%, 35% and 60% of the daily caloric intake. This was followed by a gradual increase in carbohydrate intake until a goal weight was achieved.                                                                                          | Several studies encouraged exercise, consisting of at least 30 minutes per day, 3 days of the week.                                           | Participants were offered supports such as individualized daily calorie targets; weekly calorie controlled, low-fat menu plans, grocery lists, and exercise plans; access to a web-based food and exercise diary and community forums; and group meetings and dietitian-led education sessions. | Among studies providing additional co-interventions, this typically consisted of multivitamin supplements or prepared foods to aid with adherence. |
| <i>DASH</i>             | DASH focuses on reduction of daily sodium intake (2,300 mg/day; 1,500 mg/day for some groups), with advice to consume the appropriate amount of calories to maintain a healthy weight or lose weight if needed. Daily Nutrient Goals Used in the DASH Studies (for a 2,000-Calorie Eating Plan) (Total fat: 27% of calories; Saturated fat: 6% of calories; Protein: 18% of calories; Carbohydrate: 55% of calories; Cholesterol: 150mg; Sodium: 2300mg; Potassium: 4700mg; Calcium: 1250mg; Magnesium: 500mg; Fiber: 30g). A minority of studies recommended calorie restrictions of about 500 kcal/d. Most provided no caloric guidelines. | Exercise is not typically part of the DASH eating plan.<br><br>Studies in this review advised high, moderate, low or no exercise.             | Participants were provided with moderate to high support in these studies, including menu plans and dietician support in group or individual settings. Some studies included psychological strategies such as Cognitive Behavioural Therapy.                                                    | No additional co-interventions.                                                                                                                    |
| <i>Jenny Craig**</i>    | This program typically suggested a daily caloric intake between 1200-2000 calories. Though macronutrient recommendations were not clearly provided, in general the Jenny Craig program encourages a macronutrient intake of 50-60% CHO, 20-30% protein and 20-30% fats. <sup>1</sup>                                                                                                                                                                                                                                                                                                                                                         | Recommendations of 30 minutes of exercise on 5 or more days of the week were provided.                                                        | Participants in this program were provided with personalized meal and exercise plans, and one-to-one counseling sessions with a Jenny Craig certified consultant.                                                                                                                               | Participants were provided with prepackaged, prepared foods.                                                                                       |
| <i>Mediterranean</i>    | Participants were encouraged to increase intake of vegetables, legumes, whole grains and bread, to eat fish regularly, and to choose poultry rather than other meats. Olive oil was usually recommended. A few studies recommended moderate consumption of red wine with meals.                                                                                                                                                                                                                                                                                                                                                              | In half of the studies, this program included exercise (typically walking or moderate aerobic activity).                                      | Mediterranean diet intervention arms almost always included moderate to high support, including nutritional counselling, menus, and shopping lists. Several studies demonstrated support using shared meals as part of the support.                                                             | A minority of studies provided supplements (olive oil, nuts or fish oil capsules). There were no additional co-interventions.                      |
| <i>Ornish</i>           | A daily caloric recommendation was not clearly provided in this program. However, participants were encouraged to follow a macronutrient intake of 75% CHO, 15% protein, and 10% fats.                                                                                                                                                                                                                                                                                                                                                                                                                                                       | Participants engaged in twice-weekly supervised exercise sessions. Independent, daily exercise of at least 30 minutes per day was encouraged. | Participants were provided with sessions that included supervised exercise, stress management, a meal, lifestyle-related lecture and group support.                                                                                                                                             | Participants were offered to supplement their diet with a multivitamin and omega-3 fatty acids.                                                    |

|                          |                                                                                                                                                                                                                                                                                                                                                                                                      |                                                                                                                                                                   |                                                                                                                                                                                                                                                                    |                                                            |
|--------------------------|------------------------------------------------------------------------------------------------------------------------------------------------------------------------------------------------------------------------------------------------------------------------------------------------------------------------------------------------------------------------------------------------------|-------------------------------------------------------------------------------------------------------------------------------------------------------------------|--------------------------------------------------------------------------------------------------------------------------------------------------------------------------------------------------------------------------------------------------------------------|------------------------------------------------------------|
| <i>Paleolithic</i>       | The paleolithic diet aims to mimic hunter-gatherer diet by excluding added sugars and grains and emphasizing protein (typically meat), seeds, nuts and vegetables. Paleolithic programs did not restrict caloric intake.                                                                                                                                                                             | Exercise is not typically part of the paleolithic program. Studies either recommended increased exercise without specific guidelines or did not address exercise. | Participants were provided with low to moderate support, from written materials to formal cooking classes and recipes.                                                                                                                                             | No additional co-interventions.                            |
| <i>Portfolio</i>         | This program encouraged consumption of a low-weight maintaining vegetarian diet high in cholesterol-lowering foods. The goal of the dietary portfolio was to increase plant sterols, viscous fiber (oats, barley, and psyllium), soy protein and nuts, with encouragement to consume peas, beans and lentils.                                                                                        | Exercise is not part of the dietary portfolio program.                                                                                                            | Participants were provided with moderate support. Dietitians counselled participants regularly and modified pre-intervention 7-day intake records to incorporate study foods. Participants received a 7-day study food checklist and an illustrated study booklet. | Participants used a plant sterol ester-enriched margarine. |
| <i>Rosemary Conley</i>   | Caloric and macronutrient recommendations were not clearly provided. Rosemary Conley's 'Eat Yourself Slim' manual suggests 60% CHO, 15% protein, and selection of foods containing <4% fats. <sup>2</sup>                                                                                                                                                                                            | Weekly, group exercise classes were offered to participants.                                                                                                      | Group meetings; one-on-one support; additional supports via e-mail and telephone; and exercise sessions were offered to participants.                                                                                                                              | No additional co-interventions.                            |
| <i>Slimming World</i>    | Weight loss goals in this program were individualized, and macronutrient recommendations were not clearly indicated. The approach of this program, however, is in accordance with the British Nutrition Foundation, which recommends a diet consisting of 60% CHO and 35% fats. <sup>3,4</sup>                                                                                                       | Participants were encouraged to gradually build up to 30 minutes of intense physical activity 5 days a week.                                                      | Participants were offered group meetings and group support; one-to-one phone support from a consultant or group members; and access to program websites and magazines.                                                                                             | No additional co-interventions.                            |
| <i>South Beach</i>       | Specific caloric and macronutrient recommendations were not clearly specified in this program. Participants followed the initial phase of the diet for 2 weeks and consumed small quantities of low glycemic-index carbohydrates, high intake of protein, and moderate intake of mono- and polyunsaturated fats. Following this phase participants gradually added carbohydrates back to their diet. | Exercise and physical activity were assessed, but not clearly recommended to participants in this program.                                                        | Individual counseling and support from a bariatric nutritionist were provided to participants in this diet program. In addition, participants were provided with sample meal plans and written instructions about the diet                                         | No additional co-interventions.                            |
| <i>The Biggest Loser</i> | Daily caloric intake targets were individualized in this program. Though specific macronutrient recommendations were not clearly provided, this program generally suggests no more than 30% daily caloric intake from fats.                                                                                                                                                                          | Weekly physical activity was encouraged and based on exercise preferences.                                                                                        | Participants were provided with access to online calorie-controlled, low-fat menu plans and grocery lists; weekly physical activity plans based on exercise preferences; and web-based community forums and newsletters.                                           | No additional co-interventions.                            |
| <i>Volumetrics</i>       | The key component of the program involves consumption of foods with low energy density (foods that contain a small number of calories relative to their size). Specific macronutrient recommendations were not clearly provided in this program, though Volumetrics generally                                                                                                                        | Participants were encouraged to exercise daily for 30 minutes, 5 days a week.                                                                                     | Participants were provided with written materials and instructions from a dietitian in an effort to help them achieve a reduced fat diet                                                                                                                           | No additional co-interventions.                            |

|                        |                                                                                                                                                                                                                                                                                                                                                                                                                                               |                                                                     |                                                                                                                                                                                                                                                       |                                                                                                                        |
|------------------------|-----------------------------------------------------------------------------------------------------------------------------------------------------------------------------------------------------------------------------------------------------------------------------------------------------------------------------------------------------------------------------------------------------------------------------------------------|---------------------------------------------------------------------|-------------------------------------------------------------------------------------------------------------------------------------------------------------------------------------------------------------------------------------------------------|------------------------------------------------------------------------------------------------------------------------|
|                        | suggests a daily macronutrient intake of 55% carbohydrates, 15-25% protein and 20- 30% fats. <sup>5</sup>                                                                                                                                                                                                                                                                                                                                     |                                                                     |                                                                                                                                                                                                                                                       |                                                                                                                        |
| <i>Weight Watchers</i> | In general, this program consists of tracking daily points (each point is about 50 kcal) based on a participant's current weight and weight loss goals. Though a recommended macronutrient intake was not clearly specified, this program is generally consistent with the National Academy of Sciences acceptable macronutrient distribution ranges for adults, which are 45-65% carbohydrates, 10-35% protein and 20-35% fats. <sup>6</sup> | Thirty minutes of exercise on most days of the week was encouraged. | Participants were typically provided with access to weekly group meetings and support, behavioral counseling, individual contact with the dietitian and educational resources such as recipes and meal ideas, as well as community discussion boards. | No additional co-interventions.                                                                                        |
| <i>Zone</i>            | This program typically consisted of an active weight loss-phase in which the daily caloric intake was reduced to 1500 and 1200 calories for males and females respectively, followed by a weight maintenance phase. The recommended macronutrient intake during both phases was 40% carbohydrates, 30% protein and 30% fats.                                                                                                                  | Thirty minutes of exercise on most days of the week was encouraged. | Participants were typically offered meal planning and nutritional counseling from a dietitian and group support.                                                                                                                                      | Among studies providing additional co-interventions, this typically consisted of prepared foods to aid with adherence. |

\*This table was derived from data provided in the studies. If this information was not reported, then the data was taken from the dietary program website or other available resources; please note there is often considerable variability between branded diets within included studies. \*\*Only female participants were enrolled in the 2 eligible and included Jenny Craig trials.

1. Jenny Craig. Science of Weight Loss - How It Works: Jenny Craig. <https://www.jennycraig.com/site/how-it-works/science-weight%20loss>.
2. Conley R. Eat Yourself Slim. London: Century Random House UK Limited; 2002.
3. Slimming World. Slimming World Information for Health Professionals: Resources. <http://www.slimmingworld.com/health/resourcessession/page1.aspx>.
4. British Nutrition Foundation. Nutrient requirements- Page 3. <http://www.nutrition.org.uk/nutritionscience/nutrients/nutrientrequirements?start=2>.
5. Rolls B, Robert A. The Volumetrics Weight-Control Plan: Feel Full on Fewer Calories. New York: HarperCollins Publishers Inc; 2000.
6. Weight Watchers International Inc. [http://www.weightwatchers.com/util/art/index\\_art.aspx?art\\_id=20921&tabnum=1&sc=805&subnav=Science+Library%3a+Healthy+Nutrition](http://www.weightwatchers.com/util/art/index_art.aspx?art_id=20921&tabnum=1&sc=805&subnav=Science+Library%3a+Healthy+Nutrition).

Table S2 Characteristics of Included Studies

| Study                | Country         | Network node                        | Population Description                                                              | Number of patients | Age, mean (SD), years | Women, number (%) | Body weight, mean (SD), kg | Study duration (wk) |
|----------------------|-----------------|-------------------------------------|-------------------------------------------------------------------------------------|--------------------|-----------------------|-------------------|----------------------------|---------------------|
| Wing, 1998           | USA             | Low fat, Dietary advice, Usual diet | Obese and nondiabetic, 30-100% overweight; one or both parents with Type 2 diabetes | 154                | 45.7 (4.4)            | 122 (79.0)        | 98.7 (15.1)                | 104                 |
| Iqbal, 2010          | USA             | Atkins, Low fat                     | Obese, Type 2 diabetes                                                              | 144                | 59.4 (9.2)            | 15 (10.4)         | 116.9 (18.9)               | 104                 |
| Burke, 2005          | Australia       | DASH, Dietary advice                | BMI>25, medicated hypertension                                                      | 241                | 56.2 (7.3)            | 134 (55.6)        | 85.5 (11.7)                | 68                  |
| de Lorgeril, 1994    | France          | Mediterranean, Usual diet           | MI within 6 months of enrolment                                                     | 605                | 53.5 (10.0)           | 56 (9.3)          | 73.9 (11.1)                | 260                 |
| Edwards, 2011        | USA             | DASH, Usual diet                    | Elevated BP                                                                         | 52                 | 46.4 (9.6)            | 27 (51.9)         | NR                         | 12                  |
| Droste, 2013         | Luxembourg      | Mediterranean, Usual diet           | Carotid atherosclerosis                                                             | 122                | 63.6 (9.5)            | 36 (33.0)         | 79.4 (16.3)                | 20                  |
| Dunn, 2014           | Australia       | Mediterranean, Usual diet           | Volunteer premenopausal and recreationally active but untrained women               | 32                 | 22.0 (4.4)            | 30 (100.0)        | 72.1 (11.6)                | 12                  |
| Ijzelenberg, 2012    | The Netherlands | Mediterranean, Dietary advice       | Stable established CVD and at least one lifestyle-related risk factor               | 146                | 59.9 (10.9)           | 33 (22.6)         | 87.0 (18.0)                | 24                  |
| Konstantinidou, 2010 | Spain           | Mediterranean, Usual diet           | Healthy community sample                                                            | 90                 | 44.3 (10.9)           | 64 (71.1)         | 67.3 (13.9)                | 12                  |
| Green, 2014          | USA             | DASH, Usual diet                    | Overweight and obese people taking antipsychotics                                   | 36                 | 48.5 (13.3)           | 29 (81.0)         | 95.7 (17.8)                | 12                  |
| Esposito, 2009       | Italy           | Mediterranean, Low fat              | Overweight, sedentary patients newly diagnosed with Type 2 diabetes                 | 215                | 52.2 (10.9)           | 109 (50.7)        | 85.9 (10.1)                | 208                 |
| Nowson, 2009         | Australia       | DASH, Low fat                       | Postmenopausal women with high/normal BP                                            | 111                | 59.2 (4.8)            | 95 (100.0)        | 78.5 (12.6)                | 14                  |
| Papandreu, 2012      | Greece          | Mediterranean, Low fat              | Obese sleep clinic patients with moderate-to-severe OSAS (sleep apnoea)             | 40                 | 49.0 (12.2)           | 6 (15.0)          | 105.2 (16.1)               | 24                  |
| Mekki, 2010          | Algeria         | Mediterranean, Dietary advice       | Undialyzed patients with a moderate CRF with a glomerular filtration rate (GFR) of  | 40                 | 61.0 (14.0)           | 22 (55.0)         | 74 (94.0)                  | 13                  |

|                     |                |                                    |                                                                                                                                                                      |      |             |             |             |       |
|---------------------|----------------|------------------------------------|----------------------------------------------------------------------------------------------------------------------------------------------------------------------|------|-------------|-------------|-------------|-------|
| Michalsen, 2006     | Germany        | Mediterranean, Usual diet          | 60–89 mL min <sup>-1</sup> and dyslipidemia (TG > 1.7 mmol/L) and/or total cholesterol > 5 mmol/L)<br>Patients with established CAD verified by coronary angiography | 105  | 59.4 (8.6)  | 23 (22.7)   | NR          | 52    |
| Nowson, 2005        | Australia      | DASH, Low fat                      | A seated office BP of more than 120/80 mm Hg (SBP/DBP) at their first visit, or taking antihypertensive medication.                                                  | 63   | 47.9 (9.3)  | 0 (0.0)     | 93.2 (9.6)  | 12    |
| Lima, 2013          | Brazil         | DASH, Usual diet                   | Hypertensive                                                                                                                                                         | 206  | NR          | 160 (77.6)  | NR          | 24    |
| Lindeberg, 2007     | Sweden         | Mediterranean, Paleolithic         | Ischemic heart disease                                                                                                                                               | 29   | 60.9 (8.3)  | 0 (0.0)     | 94.1 (11.1) | 12    |
| McManus, 2001       | USA            | Mediterranean, Low fat             | Overweight                                                                                                                                                           | 101  | 44.0 (10.0) | 91 (91.0)   | 91.0 (30.7) | 76    |
| Skoldstam, 2003     | Sweden         | Mediterranean, Usual diet          | Rheumatoid arthritis                                                                                                                                                 | 51   | 58.5 (NR)   | 10 (24.4)   | 76.0 (13.5) | 12    |
| Stachowska, 2005    | Poland         | Mediterranean, Low fat             | Kidney Graft recipients                                                                                                                                              | 37   | 43.2 (11.2) | 12 (32.4)   | NR          | 26    |
| Svetkey, 2009       | USA            | DASH, Dietary advice               | Hypertensive > 25 y/o                                                                                                                                                | 574  | 60.5 (11.4) | 350 (61.0)  | 90.5 (17.4) | 26,78 |
| Toobert, 2003       | USA            | Mediterranean, Usual diet          | type 2 diabetes                                                                                                                                                      | 279  | 60.9 (7.9)  | 279 (100.0) | 92.9 (22.3) | 24    |
| Tuttle, 2008        | USA            | DASH, Mediterranean                | MI                                                                                                                                                                   | 101  | 58.0 (9.5)  | 26 (26.0)   | NR          | 104   |
| Racine, 2012        | USA            | DASH, Dietary advice               | Hypertension and/or hyperlipidemia                                                                                                                                   | 321  | 72.4 (7.7)  | 250 (84.0)  | NR          | 52    |
| Sexton, 2013        | New Zealand    | Mediterranean, Usual diet          | Symptomatic asthma                                                                                                                                                   | 38   | 38.4 (13.2) | 25 (71.0)   | NR          | 12    |
| Salas-Salvado, 2008 | Spain          | Mediterranean, Low fat             | Healthy community sample                                                                                                                                             | 1264 | 67.4 (5.9)  | 658 (54.0)  | 75.4 (11.0) | 52    |
| Wardle, 2000        | United Kingdom | Mediterranean, Low fat, Usual diet | Adults with mildly or moderately raised serum cholesterol levels                                                                                                     | 176  | 53.0 (10.1) | 91 (52.0)   | 77.4 (15.7) | 12    |

|                                       |         |                           |                                                                                                                                                                                                                                                                                                                                  |     |             |            |              |    |
|---------------------------------------|---------|---------------------------|----------------------------------------------------------------------------------------------------------------------------------------------------------------------------------------------------------------------------------------------------------------------------------------------------------------------------------|-----|-------------|------------|--------------|----|
| Whitt-Glover, 2013                    | USA     | DASH, Dietary advice      | Healthy community sample                                                                                                                                                                                                                                                                                                         | 25  | 50.7 (7.9)  | 22 (88.0)  | NR           | 12 |
| Papandreu, 2012                       | Greece  | Mediterranean, Low fat    | Obese with moderate to severe OSAHS                                                                                                                                                                                                                                                                                              | 21  | 48.1 (12.4) | 4 (19.0)   | 102.3 (13.1) | 24 |
| Vincent-Baudry, 2005                  | France  | Mediterranean, Low fat    | Eligible participants: fasting plasma cholesterol concentration of 6.5-7.7 mmol/L; triacylglycerol concentration of 2.1-4.6 mmol/L; glycemia (glucose concentration of 6.1-6.9 mmol/L); systolic and diastolic blood pressure between 140-180 and 90-105 mm Hg, respectively; body mass index [BMI (in kg/m <sup>2</sup> )] ≥ 27 | 212 | 51.2 (10.5) | 100 (59.1) | NR           | 12 |
| Appel, 2003                           | USA     | DASH, Low fat             | Generally healthy adults with above optimal BP including stage 1 hypertension                                                                                                                                                                                                                                                    | 810 | 50.0 (8.9)  | 502 (62.0) | 96.9 (18.0)  | 78 |
| Athyros, 2011                         | Greece  | Mediterranean, Usual diet | Patients with mild hypercholesterolemia (TC 5.2-6.4 mmol/l)                                                                                                                                                                                                                                                                      | 150 | 54.7 (3.7)  | 77 (51.0)  | NR           | 16 |
| Blumenthal 2010a, 2010b, Epstein 2012 | USA     | DASH, Usual diet          | Overweight with above normal BP                                                                                                                                                                                                                                                                                                  | 144 | 52.0 (10.0) | 97 (67.4)  | 93.1 (14.1)  | 52 |
| Ruth, 2013                            | USA     | Atkins, Low fat           | Obese, otherwise healthy                                                                                                                                                                                                                                                                                                         | 55  | 42.5 (12.1) | 49 (89.1)  | 99.9 (14.4)  | 12 |
| Elhayany, 2010                        | Israel  | Mediterranean, Low fat    | Overweight diabetic patients                                                                                                                                                                                                                                                                                                     | 259 | 56.3 (6.2)  | 86 (48.0)  | 86.7 (12.9)  | 52 |
| Bazzano, 2014                         | USA     | Atkins, Low fat           | General public                                                                                                                                                                                                                                                                                                                   | 148 | 46.8 (10.1) | 131 (88.5) | 97.1 (13.0)  | 52 |
| de la Iglesia, 2014                   | Spain   | Zone, Low fat             | General public with Metabolic Syndrome                                                                                                                                                                                                                                                                                           | 105 | 49.0 (10.0) | 45 (47.0)  | 99.7 (17.9)  | 24 |
| Dyson, 2007                           | UK      | Atkins, Low fat           | Half Type II diabetes, half without                                                                                                                                                                                                                                                                                              | 26  | 52.0 (9.0)  | 20 (77.0)  | 96.3 (16.6)  | 12 |
| Foraker, 2014                         | USA     | Zone, Low fat             | Premenopausal women with BMI 25-34                                                                                                                                                                                                                                                                                               | 79  | 41.4 (5.3)  | 79 (100.0) | 83.9 (8.9)   | 52 |
| Frisch, 2009                          | Germany | Atkins, Low fat           | Overweight                                                                                                                                                                                                                                                                                                                       | 200 | 47.0 (10.5) | 138 (69.0) | 99.6 (16.3)  | 52 |
| Garcia-Toro, 2014                     | Spain   | Mediterranean,            | Depressive episode                                                                                                                                                                                                                                                                                                               | 80  | 49.0 (11.2) | 37 (73.0)  | NR           | 24 |

|                                             |             |                                                      |                                                                                        |     |             |             |              |     |
|---------------------------------------------|-------------|------------------------------------------------------|----------------------------------------------------------------------------------------|-----|-------------|-------------|--------------|-----|
| Shai, 2008                                  | Israel      | Dietary advice<br>Atkins, Mediterranean, Low fat     | Obese (BMI $\geq 27$ ), or Type 2 diabetes or coronary heart disease regardless of BMI | 322 | 52.0 (7.0)  | 45 (14.0)   | 91.4 (13.4)  | 104 |
| Gardner, 2007                               | USA         | Atkins, Ornish, Zone, Low fat                        | Obese, otherwise healthy                                                               | 311 | 41.0 (6.0)  | 311 (100.0) | 85.2 (12.4)  | 52  |
| Brehm, 2003                                 | USA         | Atkins, Low fat                                      | Obese, otherwise healthy                                                               | 53  | 43.6 (7.7)  | 42 (100.0)  | 91.7 (7.2)   | 24  |
| Brinkworth, 2009                            | Australia   | Atkins, Low fat                                      | Abdominal obesity and 1 other metabolic syndrome risk factor                           | 118 | 50.1 (7.9)  | 75 (63.6)   | 95.3 (15.3)  | 52  |
| Daly, 2006                                  | UK          | Atkins, Low fat                                      | Obese, poorly controlled Type 2 diabetes                                               | 102 | 58.6 (10.8) | 53 (51.9)   | 101.9 (15.6) | 12  |
| Lasker, 2008                                | USA         | Zone, Low fat                                        | Obese, otherwise healthy                                                               | 65  | 47.2 (7.0)  | 31 (62.0)   | 95.5 (15.0)  | 16  |
| Foster, 2010                                | USA         | Atkins, Low fat                                      | Obese, otherwise healthy                                                               | 307 | 45.5 (9.7)  | 208 (67.8)  | 103.4 (14.9) | 104 |
| Foster, 2003                                | USA         | Atkins, Low fat                                      | Obese, otherwise healthy                                                               | 63  | 44.1 (8.2)  | 43 (68.2)   | 98.5 (17.8)  | 52  |
| Truby et al, 2006 and Morgan et al, 2008    | UK          | Atkins, Weight Watchers, Rosemary Conley, Usual diet | Obese, otherwise healthy                                                               | 293 | 40.2 (10.2) | 214 (73.0)  | 89.4 (13.3)  | 52  |
| Volek, 2009                                 | USA         | Atkins, Low fat                                      | Obese, atherogenic dyslipidemia                                                        | 40  | 34.7 (11.9) | 20 (50.0)   | 95.4 (14.4)  | 12  |
| Brehm, 2005                                 | USA         | Atkins, Low fat                                      | Obese, otherwise healthy                                                               | 50  | 43.1 (12.5) | 40 (100.0)  | 90.7 (2.2)   | 16  |
| Davis, 2009                                 | USA         | Atkins, Low fat                                      | Obese, Type 2 diabetes                                                                 | 105 | 53.5 (6.5)  | 82 (78.1)   | 97.3 (18.5)  | 52  |
| Westman, 2008                               | USA         | Atkins, Low fat                                      | Obese, Type 2 diabetes                                                                 | 97  | 51.8 (7.5)  | 66 (78.6)   | 105.9 (19.6) | 24  |
| McAuley, 2005                               | New Zealand | Atkins, Zone, Low fat                                | Obese, insulin-resistant women, otherwise healthy                                      | 96  | 45.6 (7.6)  | 93 (100.0)  | 95.8 (13.4)  | 24  |
| Dansinger, 2005                             | USA         | Atkins, Ornish, Weight Watchers, Zone                | Obese and 1 other metabolic cardiac risk factor(s)                                     | 160 | 49.0 (11.0) | 81 (51.0)   | 100.0 (15.0) | 52  |
| Yancy, 2004, Westman, 2006, and Yancy, 2009 | USA         | Atkins, Low fat                                      | Obese, otherwise healthy. Elevated lipid levels                                        | 120 | 44.9 (9.5)  | 91 (76.5)   | 97.3 (17.1)  | 24  |

|                                                                                         |           |                                          |                                                                            |     |             |            |              |     |
|-----------------------------------------------------------------------------------------|-----------|------------------------------------------|----------------------------------------------------------------------------|-----|-------------|------------|--------------|-----|
| Aldana, 2007                                                                            | USA       | Ornish, Dietary advice                   | Coronary artery disease                                                    | 93  | 62.0 (9.1)  | 41 (44.0)  | 89.8 (21.2)  | 52  |
| Blumenthal, 2000                                                                        | USA       | Low fat, Usual diet                      | Obese, unmedicated high-normal blood pressure or stage I or 2 hypertension | 133 | 47.5 (8.9)  | 74 (56.0)  | 94.2 (16.5)  | 24  |
| Brinkworth, 2004a, Brinkworth, 2004b, Farnsworth, 2003a, Layman, 2003, and Parker, 2002 | Australia | Zone, Low fat                            | Obese, Type 2 diabetes                                                     | 66  | 61.8 (7.8)  | 23 (60.5)  | 93.7 (18.1)  | 64  |
| Das, 2007                                                                               | USA       | Zone, Low fat                            | Obese, otherwise healthy                                                   | 34  | 35.0 (6.0)  | 26 (76.0)  | 79.0 (10.7)  | 52  |
| Ebbeling, 2007                                                                          | USA       | Zone, Low fat                            | Obese, otherwise healthy                                                   | 73  | 27.5 (4.0)  | 58 (79.0)  | 103.4 (16.2) | 74  |
| Guldbrand, 2012                                                                         | Sweden    | Atkins, Low fat                          | Type 2 diabetes                                                            | 61  | 62.0 (10.1) | 34 (55.7)  | 95.2 (19.7)  | 104 |
| Haufe et al, 2011 and Haufe et al, 2012                                                 | Germany   | Atkins, Low fat                          | Obese, otherwise healthy                                                   | 170 | 44.1 (8.6)  | 84 (82.4)  | 92.6 (15.2)  | 24  |
| Collins, 2010                                                                           | Australia | Biggest Loser, Usual diet                | Obese, otherwise healthy                                                   | 309 | 42.0 (10.2) | 180 (58.0) | 94.0 (14.6)  | 12  |
| Heshka, 2000                                                                            | USA       | Weight Watchers, Dietary advice          | Obese, otherwise healthy                                                   | 423 | 44.5 (10.0) | 358 (84.6) | 93.7 (13.8)  | 104 |
| Jen et al, 2004 and Djuric et al, 2002                                                  | USA       | Weight Watchers, Low fat, Dietary advice | Stage I or II breast cancer                                                | 48  | 51.7 (8.4)  | 48 (100.0) | 95.4 (13.9)  | 52  |
| Layman, 2005                                                                            | USA       | Zone, Low fat                            | Obese, otherwise healthy                                                   | 48  | 46.6 (4.9)  | 48 (100.0) | 87.7 (13.8)  | 16  |
| Layman, 2009                                                                            | USA       | Zone, Low fat                            | Obese, otherwise healthy                                                   | 130 | 45.4 (13.7) | 71 (54.6)  | 92.8 (14.5)  | 52  |
| Ello-Martin, 2007                                                                       | USA       | Volumetric, Low fat                      | Obese, otherwise healthy                                                   | 97  | 44.9 (9.4)  | 97 (100.0) | 90.5 (9.6)   | 52  |
| Stern et al, 2004 and Samaha et al, 2003                                                | USA       | Atkins, Low fat                          | Diabetes and metabolic syndrome                                            | 132 | 53.5 (9.0)  | 23 (17.4)  | 131.0 (25.1) | 52  |
| Thomson, 2010                                                                           | USA       | Atkins, Low fat                          | Post-menopausal women, survivors of                                        | 43  | 56.2 (9.4)  | 40 (100.0) | 84.1 (12.3)  | 24  |



|                |           |                                                      |                                                                        |     |             |             |             |     |
|----------------|-----------|------------------------------------------------------|------------------------------------------------------------------------|-----|-------------|-------------|-------------|-----|
| Yamada, 2014   | Japan     | Atkins, Low fat<br>Jenny                             | Stage I or II breast cancer<br>Patients with DM2, high HbA1c (6.9-8.4) | 24  | 63.3 (12.0) | 12 (50.0)   | 67.6 (12.5) | 24  |
| Rock, 2007     | USA       | Craig, Dietary advice<br>Jenny                       | Obese, otherwise healthy                                               | 70  | 41.1 (11.5) | 70 (100.0)  | 92.0 (10.8) | 52  |
| Rock, 2010     | USA       | Craig, Dietary advice                                | Obese, otherwise healthy                                               | 446 | 44.3 (10.3) | 442 (100.0) | 92.2 (NR)   | 104 |
| Rippe, 1998    | USA       | Weight Watchers, Usual diet                          | Overweight, otherwise healthy                                          | 80  | 36.5 (6.9)  | 80 (100.0)  | 81.5 (7.0)  | 12  |
| Womble, 2004   | USA       | Low fat, Dietary advice<br>Weight Watchers, Slimming | Obese, otherwise healthy                                               | 47  | 43.7 (10.2) | 47(100)     | 90.7 (11.7) | 52  |
| Jolly, 2011    | UK        | World, Rosemary Conley, Dietary advice               | Obese, with or without comorbidities                                   | 740 | 49.3 (14.7) | 513(69.3)   | 93.4 (14.4) | 52  |
| Pinto, 2013    | USA       | Weight Watchers, Low fat                             | Overweight or obese, otherwise healthy                                 | 144 | 49.7 (9.2)  | 127 (90.0)  | 96.6 (17.4) | 48  |
| Wadden, 2004   | USA       | Low fat, Dietary advice                              | Obese, otherwise healthy                                               | 123 | 44.1 (9.9)  | 123 (100)   | 97.3 (13)   | 65  |
| Galletly, 2007 | Australia | Zone, Low fat                                        | Overweight, polycystic ovary syndrome                                  | 28  | 32.5 (1.2)  | 28(100)     | 101.3 (4.8) | 16  |
| Goodrick, 1998 | USA       | Low fat, Dietary advice, Usual diet                  | Overweight, binge eating, otherwise healthy                            | 219 | 40.0 (6.3)  | 219(100)    | 87.8 (9.8)  | 76  |
| Luscombe, 2002 | Australia | Zone, Low fat                                        | Type 2 diabetes                                                        | 32  | 63.2 (9.7)  | 15 (57.7)   | 92.9 (15.7) | 12  |
| Luscombe, 2003 | Australia | Zone, Low fat                                        | Obese, hyperinsulinemia                                                | 36  | 54.0 (6.0)  | 26(72.2)    | 94.0 (15.0) | 16  |
| Jenkins, 2014  | Canada    | Atkins, Low fat                                      | Overweight, hyperlipidemic                                             | 50  | 56.5 (7.0)  | 24 (61.5)   | 84.5 (12.8) | 26  |
| Kitabchi, 2013 | USA       | Zone, Dietary advice                                 | Premenopausal women with a BMI 30 to 55                                | 32  | 35.6 (10.0) | 32 (100)    | NR          | 26  |
| Lim, 2010      | Australia | Atkins, Low fat, Usual diet                          | At least one CVD risk factor other than obesity                        | 113 | 47.0 (10.0) | 93 (89.4)   | 89.8 (2.6)  | 64  |
| Mellberg, 2014 | Sweden    | Paleolithic, Low fat                                 | Post-menopausal obese women                                            | 70  | 59.9 (5.7)  | 61 (100)    | 86.9 (10.3) | 104 |

|                   |                        |                                 |                                                                                               |      |             |            |              |     |
|-------------------|------------------------|---------------------------------|-----------------------------------------------------------------------------------------------|------|-------------|------------|--------------|-----|
| Ornish, 1990      | USA                    | Ornish, Usual diet              | Coronary artery disease                                                                       | 53   | 57.8 (8.2)  | 5 (12.2)   | 86.1 (19.2)  | 52  |
| Rock, 2014        | USA                    | Jenny Craig, Low fat            | Type II diabetes with BMI 25–45                                                               | 227  | 56.5 (9.0)  | 116 (51.1) | 105.5 (17.7) | 52  |
| Sacks, 2009       | USA                    | Atkins, Low fat                 | Overweight or obese                                                                           | 811  | 51.0 (9.0)  | 515 (64)   | 93.0 (16.0)  | 104 |
| Saslow, 2014      | USA                    | Atkins, Low fat                 | Diabetic or prediabetic, BMI of 25 or more                                                    | 34   | 59.5 (11.2) | 25 (73.6)  | 99.9 (24.8)  | 12  |
| Tay, 2014         | AUS                    | Atkins, Low fat                 | BMI 26–45 kg/m <sup>2</sup> , with T2DM                                                       | 131  | 58.0 (7.0)  | 49 (42.6)  | 101.7 (15.0) | 24  |
| Wycherley, 2012   | AUS                    | Atkins, Low fat                 | Overweight or obese                                                                           | 123  | 50.7 (9.3)  | 0 (0.0)    | 103.7 (13.9) | 52  |
| Wycherley, 2013   | AUS                    | Atkins, Low fat                 | Overweight or obese with at least one American Heart Association metabolic syndrome component | 56   | 46.8 (8.1)  | 0 (0.0)    | 106.5 (12.3) | 12  |
| Aude, 2004        | USA                    | South Beach, Low fat            | General public                                                                                | 60   | 45.1 (10.0) | 28 (52.0)  | 99.5 (27.5)  | 12  |
| Johnston, 2013    | USA                    | Weight Watchers, Dietary advice | General public                                                                                | 292  | 46.5 (10.5) | 262 (89.8) | 90.1 (13.4)  | 24  |
| Landers, 2002     | USA                    | Atkins, Zone, Low fat           | General public                                                                                | 91   | NR          | NR         | NR           | 12  |
| Panunzio, 2011    | Italy                  | Mediterranean, Usual diet       | General public                                                                                | 80   | 54.8 (0.7)  | 35 (57.3)  | 74.8 (12.9)  | 25  |
| Liu, 2013         | China                  | Atkins, Low fat                 | Overweight                                                                                    | 50   | 47.9 (6.6)  | 50 (100.0) | 65.9 (6.5)   | 12  |
| Jebb, 2011        | UK, Germany, Australia | Weight Watchers, Dietary advice | Obese, and one other risk factor for obesity-related disease                                  | 772  | 47.3 (12.8) | 668 (86.5) | 86.7 (11.6)  | 52  |
| Ahern, 2017       | England                | Weight Watchers, Dietary advice | BMI > 28, general practice                                                                    | 1269 | 53.2 (13.8) | 859 (68.0) | 96.1 (17.0)  | 104 |
| Guldbrand, 2014   | Sweden                 | Atkins, Low fat                 | Type 2 diabetes                                                                               | 61   | 62.0 (10.3) | 34 (56.0)  | 95.1 (20.3)  | 104 |
| Veum, 2017        | Norway                 | Atkins, Low fat                 | Non-diabetic, abdominal obesity                                                               | 46   | 40.2 (5.1)  | 0 (0.0)    | 111.5 (11.5) | 12  |
| Hill, 2015        | US                     | DASH                            | Overweight                                                                                    | 66   | 45.9 (36.5) | 34 (54.8)  | 102.9 (72.4) | 156 |
| Foroozanfar, 2017 | Iran                   | DASH, Low fat                   | Overweight and/or obese                                                                       | 60   | 26.4 (4.3)  | 60 (100.0) | 86.1 (14.2)  | 12  |
| Azadi, 2016       | Iran                   | DASH, Low fat                   | Overweight or obese with polycystic ovary syndrome                                            | 60   | 31.9 (6.1)  | 60 (100.0) | 79.3 (12.0)  | 12  |

|                                                         |                                            |                                                                            |                                                                             |      |                |                |                 |           |
|---------------------------------------------------------|--------------------------------------------|----------------------------------------------------------------------------|-----------------------------------------------------------------------------|------|----------------|----------------|-----------------|-----------|
| Ramprasad<br>h, 2014<br>and<br>Jenkins,<br>2011         | Canada                                     | Portfolio,<br>Low fat                                                      | Hyperlipidemic                                                              | 351  | 56.3 (9.1)     | 211 (61.2)     | 75.4<br>(13.5)  | 86        |
| Green,<br>2015                                          | USA                                        | DASH,<br>Usual diet                                                        | Taking antipsychotic<br>agents, BMI 25-45                                   | 200  | 47.2<br>(10.6) | 144 (72.0)     | 107.7<br>(25.1) | 52        |
| Ma, 2015                                                | USA                                        | DASH,<br>Usual diet                                                        | BMI 18.5-39.9 kg·m <sup>-2</sup> ,<br>and uncontrolled<br>persistent asthma | 90   | 51.8<br>(12.3) | 67 (74.4)      | 76.5<br>(15.9)  | 24        |
| Austel,<br>2015                                         | Germany                                    | Mediterra<br>nean,<br>Usual diet                                           | Overweight                                                                  | 225  | 52.5 (1.0)     | 174 (82.1)     | 84.5 (1.3)      | 52        |
| Abenavoli,<br>2017                                      | Italy                                      | Mediterra<br>nean,<br>Usual diet                                           | Caucasian overweight                                                        | 50   | 46.1 (4.5)     | 16 (8.0)       | 86.1 (3.2)      | 24        |
| Yang, 2016                                              | China                                      | Weight<br>Watchers,<br>Dietary<br>advice                                   | Overweight                                                                  | 300  | 49.2<br>(10.4) | 239 (79.7)     | 73.4 (9.7)      | 26        |
| Baetge,<br>2017                                         | US                                         | Weight<br>Watchers,<br>Jenny<br>Craig,<br>Dietary<br>advice,<br>Usual diet | Overweight/obese,<br>sedentary women                                        | 133  | 47.2<br>(11.3) | 113<br>(100.0) | 86.0<br>(14.0)  | 12        |
| Marrero,<br>2016                                        | US                                         | Weight<br>Watchers,<br>Dietary<br>advice                                   | Overweight                                                                  | 225  | 51.6<br>(11.2) | 191 (84.9)     | 100.6<br>(20.8) | 24 and 52 |
| Kafeshani,<br>2015                                      | Iran                                       | DASH,<br>Usual diet                                                        | Obese, otherwise<br>healthy                                                 | 51   | 37.5 (8.4)     | 44 (100.0)     | 83.3 (8.9)      | 12        |
| Fito, 2014                                              | Spanish                                    | Mediterra<br>nean, Low<br>fat                                              | Participants at high risk<br>of CVD, but with no<br>CVD                     | 7447 | 66.7 (5.9)     | 522 (56.1)     | NR              | 295       |
| Brader et<br>al, 2014<br>and<br>Uusitupa<br>et al, 2013 | Finland,<br>Iceland,<br>Sweden,<br>Denmark | Mediterra<br>nean,<br>Dietary<br>advice                                    | Overweight                                                                  | 213  | 54.3 (8.2)     | 101 (66.0)     | NR              | 24        |
| Davis,<br>2017a                                         | Australia                                  | Mediterra<br>nean,<br>Usual diet                                           | Healthy elderly<br>population                                               | 166  | 71.0 (4.9)     | 84 (56.5)      | NR              | 24        |
| O'Neil,<br>2016                                         | USA                                        | Weight<br>Watchers,<br>Usual diet                                          | Type 2 diabetes                                                             | 563  | NR             | 400 (71.0)     | 105.1<br>(19.7) | 52        |

sd, standard deviation; wk, weeks; nr, not reported; CVD, cardiovascular disease

Table S3: The number of study and participants of individual popular named diets for all outcomes

| Popular Diets     | Weight loss  |                 |              |                 | LDL reduction |                 |              |                 |
|-------------------|--------------|-----------------|--------------|-----------------|---------------|-----------------|--------------|-----------------|
|                   | 6-months     |                 | 12-months    |                 | 6-months      |                 | 12-months    |                 |
|                   | No. of study | No. of patients | No. of study | No. of patients | No. of study  | No. of patients | No. of study | No. of patients |
| Atkins            | 34           | 1356            | 16           | 834             | 32            | 1413            | 13           | 642             |
| Dietary advice    | 17           | 1736            | 12           | 1082            | 9             | 509             | 8            | 735             |
| Low fat           | 64           | 2592            | 30           | 1771            | 48            | 2105            | 22           | 1049            |
| Usual diet diet   | 26           | 1519            | 7            | 712             | 18            | 1074            | 7            | 696             |
| DASH              | 14           | 1110            | 1            | 87              | 6             | 314             | 2            | 150             |
| Jenny Craig       | 4            | 539             | 3            | 499             | 4             | 538             | 3            | 496             |
| Mediterranean     | 13           | 552             | 5            | 1312            | 16            | 954             | 5            | 560             |
| Ornish            | 3            | 124             | 4            | 145             | 3             | 131             | 4            | 152             |
| Paleolithic       | 2            | 48              | 1            | 34              | 1             | 34              | -            | -               |
| Portfolio         | 1            | 223             | -            | -               | 1             | 223             | -            | -               |
| Rosemary Conley   | 2            | 121             | 2            | 88              | 1             | 41              | -            | -               |
| Slimming World    | 1            | 85              | 1            | 62              | -             | -               | -            | -               |
| South Beach       | 1            | 22              | -            | -               | 1             | 22              | -            | -               |
| The Biggest Loser | 1            | 164             | -            | -               | 1             | 164             | -            | -               |
| Volumetrics       | 1            | 35              | 1            | 35              | 1             | 35              | 1            | 35              |
| Weight Watchers   | 12           | 2095            | 10           | 1941            | 5             | 464             | 6            | 1352            |
| Zone              | 15           | 406             | 6            | 209             | 11            | 347             | 6            | 203             |

Table S3 continued: The number of study and participants of individual popular named diets for all outcomes

| Popular Diets     | HDL increase |                 |              |                 | SBP reduction |                 |              |                 |
|-------------------|--------------|-----------------|--------------|-----------------|---------------|-----------------|--------------|-----------------|
|                   | 6-months     |                 | 12-months    |                 | 6-months      |                 | 12-months    |                 |
|                   | No. of study | No. of patients | No. of study | No. of patients | No. of study  | No. of patients | No. of study | No. of patients |
| Atkins            | 32           | 1413            | 13           | 642             | 30            | 1342            | 13           | 648             |
| Dietary advice    | 10           | 591             | 9            | 817             | 10            | 929             | 6            | 750             |
| Low fat           | 48           | 2105            | 22           | 1049            | 43            | 2188            | 18           | 947             |
| Usual diet diet   | 17           | 1070            | 7            | 706             | 21            | 1340            | 6            | 657             |
| DASH              | 6            | 314             | 2            | 150             | 13            | 1009            | 2            | 150             |
| Jenny Craig       | 4            | 538             | 3            | 496             | 1             | 147             | 1            | 135             |
| Mediterranean     | 15           | 934             | 5            | 560             | 10            | 645             | 3            | 388             |
| Ornish            | 3            | 131             | 4            | 152             | 3             | 126             | 4            | 147             |
| Paleolithic       | 1            | 34              | -            | -               | 1             | 34              | -            | -               |
| Portfolio         | 1            | 223             | -            | -               | 1             | 223             | -            | -               |
| Rosemary Conley   | 1            | 41              | -            | -               | 1             | 42              | -            | -               |
| Slimming World    | -            | -               | -            | -               | -             | -               | -            | -               |
| South Beach       | 1            | 22              | -            | -               | -             | -               | -            | -               |
| The Biggest Loser | 1            | 164             | -            | -               | 1             | 164             | -            | -               |
| Volumetrics       | 1            | 35              | 1            | 35              | 1             | 35              | 1            | 35              |
| Weight Watchers   | 6            | 572             | 7            | 1455            | 7             | 1627            | 6            | 1806            |
| Zone              | 11           | 347             | 6            | 203             | 8             | 267             | 4            | 160             |

Table S3 continued: The number of study and participants of individual popular named diets for all outcomes

| Popular Diets     | DBP reduction |                 |              |                 | CRP reduction |                 |              |                 |
|-------------------|---------------|-----------------|--------------|-----------------|---------------|-----------------|--------------|-----------------|
|                   | 6-months      |                 | 12-months    |                 | 6-months      |                 | 12-months    |                 |
|                   | No. of study  | No. of patients | No. of study | No. of patients | No. of study  | No. of patients | No. of study | No. of patients |
| Atkins            | 29            | 1302            | 13           | 648             | 13            | 473             | 5            | 173             |
| Dietary advice    | 10            | 929             | 6            | 750             | 3             | 133             | 1            | 94              |
| Low fat           | 42            | 2149            | 18           | 947             | 16            | 695             | 5            | 168             |
| Usual diet diet   | 21            | 1340            | 6            | 657             | 7             | 470             | 3            | 293             |
| DASH              | 13            | 1009            | 2            | 150             | -             | -               | -            | -               |
| Jenny Craig       | 1             | 147             | 1            | 135             | 2             | 476             | 1            | 313             |
| Mediterranean     | 10            | 645             | 3            | 388             | 8             | 376             | 1            | 48              |
| Ornish            | 3             | 126             | 4            | 147             | 1             | 21              | 1            | 20              |
| Paleolithic       | 1             | 34              | -            | -               | 1             | 34              | -            | -               |
| Portfolio         | 1             | 223             | -            | -               | 1             | 223             | -            | -               |
| Rosemary Conley   | 1             | 42              | -            | -               | -             | -               | -            | -               |
| Slimming World    | -             | -               | -            | -               | -             | -               | -            | -               |
| South Beach       | -             | -               | -            | -               | -             | -               | -            | -               |
| The Biggest Loser | 1             | 164             | -            | -               | -             | -               | -            | -               |
| Volumetrics       | 1             | 35              | 1            | 35              | -             | -               | -            | -               |
| Weight Watchers   | 7             | 1650            | 6            | 1806            | 2             | 252             | 2            | 227             |
| Zone              | 8             | 267             | 4            | 160             | 4             | 85              | 2            | 45              |

**Table S4: The reported information on funding sources, potential conflict of interest, primary and secondary outcomes reported in RCTs**

| <b>Study</b>         | <b>Funding sources</b>                                                                                                                                                                                                                                                            | <b>Potential conflict of interest</b> | <b>Primary outcomes reported in RCTs</b> | <b>Secondary outcomes reported in RCTs</b>                        |
|----------------------|-----------------------------------------------------------------------------------------------------------------------------------------------------------------------------------------------------------------------------------------------------------------------------------|---------------------------------------|------------------------------------------|-------------------------------------------------------------------|
| Wing, 1998           | National Institutes of Health                                                                                                                                                                                                                                                     | NR                                    | NS                                       | NS                                                                |
| Iqbal, 2010          | Veterans Affairs Merit Review Entry Program                                                                                                                                                                                                                                       | None                                  | Changes in weight                        | Changes in lipids                                                 |
| Burke, 2005          | Australian National Health and Medical Research Council Australian Fisheries Research and Development Corporation                                                                                                                                                                 | None                                  | Blood pressure                           | NS                                                                |
| De Lorgeril, 1994    | INSERM*, Ministry of Research, NAMTS*, CETIOM*, and ONIDOL*, Astea-Clave BSN*, and the Fondation pour la Recherche Medicale                                                                                                                                                       | NR                                    | NS                                       | NS                                                                |
| Edwards, 2011        | National Institutes of Health                                                                                                                                                                                                                                                     | None                                  | NS                                       | NS                                                                |
| Droste, 2013         | Centre de Recherche Public-Santé                                                                                                                                                                                                                                                  | None                                  | 24-hour SBP                              | 24-hour DBP, diurnal and nocturnal SBP, diurnal and nocturnal DBP |
| Dunn, 2014           | None                                                                                                                                                                                                                                                                              | None                                  | NS                                       | NS                                                                |
| Ijzelenberg, 2012    | Netherlands Organisation for Health Research and Development                                                                                                                                                                                                                      | None                                  | Weight, DBP, SBP, HDL, LDL               | NS                                                                |
| Konstantinidou, 2010 | Fóndo de Investigación Sanitaria–Fóndo Europeo de Desarrollo Regional, by Sistema Nacional de Salud contract Miguel Servet Instituto de Salud Carlos III, and by the Greek State Scholarship Foundation (Athens, Greece), and partially supported by the Generalitat of Catalunya | None                                  | NS                                       | NS                                                                |
| Green, 2014          | NR                                                                                                                                                                                                                                                                                | None                                  | NS                                       | NS                                                                |
| Esposito, 2009       | Second University of Naples                                                                                                                                                                                                                                                       | None                                  | Not relevant                             | Changes in weight                                                 |
| Nowson, 2009         | Meat & Livestock Australia                                                                                                                                                                                                                                                        | None                                  | NS                                       | NS                                                                |
| Papandreu, 2012      | NR                                                                                                                                                                                                                                                                                | None                                  | NS                                       | NS                                                                |
| Mekki, 2010          | National Agency of Health Research                                                                                                                                                                                                                                                | NR                                    | NS                                       | NS                                                                |
| Michalsen, 2006      | Alfried Krupp von Bohlen und Halbach Foundation                                                                                                                                                                                                                                   | NR                                    | NS                                       | NS                                                                |
| Nowson, 2005         | Dairy Research and Development Corporation                                                                                                                                                                                                                                        | None                                  | NS                                       | NS                                                                |
| Lima, 2013           | Fundacao de Amparo e Pesquisa do Estado do Maranhao and Coordenacao de perfeicoamento de Pessoal de Nivel Superior                                                                                                                                                                | None                                  | NS                                       | NS                                                                |

|                      |                                                                                                                                                                                                                                                                                                                                                                       |        |                                                  |                                              |
|----------------------|-----------------------------------------------------------------------------------------------------------------------------------------------------------------------------------------------------------------------------------------------------------------------------------------------------------------------------------------------------------------------|--------|--------------------------------------------------|----------------------------------------------|
| Lindeberg, 2007      | Region Skåne and Lund University                                                                                                                                                                                                                                                                                                                                      | None   | Changes in body weight                           | Not relevant                                 |
| McManus, 2001        | Peanut Institute, the International Olive Oil Council, and International Tree Nut Council                                                                                                                                                                                                                                                                             | NR     | Change in body weight from baseline to 18 months | Change in body weight at 6, 12 and 18 months |
| Skoldstam, 2003      | Grants from the Faculty of Social Sciences of Umeå University, the Swedish Foundation for Health Care Sciences and Allergy Research, the Health Research Council in southeast Sweden, the Swedish Rheumatism Association, the Swedish Nutrition Foundation, the JC Kempe Memorial Scholarship Fund, the Borgerskapet i Umeå Fund, and the Uppsala Hemsysterskola Fund | NR     | NS                                               | NS                                           |
| Stachowska, 2005     | NR                                                                                                                                                                                                                                                                                                                                                                    | NR     | NS                                               | NS                                           |
| Svetkey, 2009        | National Institutes of Health                                                                                                                                                                                                                                                                                                                                         | None   | SBP                                              | DBP                                          |
| Toobert, 2003        | National Heart, Lung, and Blood Institute                                                                                                                                                                                                                                                                                                                             | NR     | NS                                               | NS                                           |
| Tuttle, 2008         | Washington State Attorney General Vitamins Settlement Fund                                                                                                                                                                                                                                                                                                            | Note 1 | NS                                               | NS                                           |
| Racine, 2012         | Fund from Administration on Aging through a cooperative agreement with the Mecklenburg County Department of Social Services                                                                                                                                                                                                                                           | None   | NS                                               | NS                                           |
| Sexton, 2013         | Health Research Council of New Zealand                                                                                                                                                                                                                                                                                                                                | None   | NS                                               | NS                                           |
| Salas-Salvado, 2008  | Grants from the Generalitat valenciana. The Fundación Patrimonio Comunal Olivarero and Hojiblanca SA (Málaga, Spain) donated the olive oil used in this study, California Walnut Commission (Sacramento, California) donated the walnuts, Borges SA (Reus) donated the almonds, and Morella Nuts SA (Reus, Spain) donated the hazelnuts                               | None   | NS                                               | NS                                           |
| Wardle, 2000         | Grant from Biotechnology and Biological Sciences Research Council                                                                                                                                                                                                                                                                                                     | NR     | NS                                               | NS                                           |
| Whitt-Glover, 2013   | National Heart, Lung, and Blood Institute                                                                                                                                                                                                                                                                                                                             | None   | Changes in blood pressure                        | SBP, DBP                                     |
| Papandreu, 2012      | NR                                                                                                                                                                                                                                                                                                                                                                    | None   | NS                                               | NS                                           |
| Vincent-Baudry, 2005 | French Research Ministry, INSERM*, the provence-Alpes-Côte d'Azur Regional Council, the Bouches du Rhône General Council, the CRITT-PACA*, and the following companies: Rivoire & Carret Lustucru, Jean Martin, Le Cabanon,                                                                                                                                           | None   | NS                                               | NS                                           |



|                                          |                                                                                                                   |        |                        |                                            |
|------------------------------------------|-------------------------------------------------------------------------------------------------------------------|--------|------------------------|--------------------------------------------|
|                                          | Boulangerie Coagulation Surgelés, Distplack Mariani, and Minoterie Giraud                                         |        |                        |                                            |
| Appel, 2003                              | National Institutes of Health                                                                                     | NR     | Change in SBP          | Change in DBP                              |
| Athyros, 2011                            | Minerva Hellas                                                                                                    | NR     | Not relevant           | Change in lipid, blood pressure            |
| Blumenthal, 2010a                        | National Heart, Lung, and Blood Institute and the General Clinical Research Center, National Institutes of Health | NR     | SBP,DBP                | Not relevant                               |
| Ruth, 2013                               | Dr. Robert C. and Veronica Atkins Foundation, Boston University Clinical and Translational Science Institute      | Note 2 | Not relevant           | Weight loss                                |
| Elhayany, 2010                           | NR                                                                                                                | None   | NS                     | NS                                         |
| Bazzano, 2014                            | National Institutes of Health                                                                                     | None   | Body weight            | Not relevant                               |
| de la Iglesia, 2014                      | Health Department of the Government of Navarra and the Linea Especial about Nutrition, Obesity and Health         | None   | NS                     | NS                                         |
| Dyson, 2007                              | Medisense UK, Abbott Laboratories                                                                                 | Note 3 | Body weight            | HDL, LDL                                   |
| Foraker, 2014                            | Breast Cancer Research Foundation and the National Center for Advancing Translational Sciences                    | None   | Changes in body weight | Changes in blood pressure and blood lipids |
| Frisch, 2009                             | Fund by different German health insurances and the 'Institute for Applied Telemedicine'                           | None   | Weight loss            | Blood pressure, blood lipids               |
| Garcia-Toro, 2014                        | the Instituto de Salud Carlos III of the Spanish Ministry of Health                                               | None   | NS                     | NS                                         |
| Shai, 2008                               | Atkins Research Foundation                                                                                        | None   | Weight loss            | Not relevant                               |
| Gardner, 2007                            | Hass Avocado Board                                                                                                | None   | Weight change          | LDL, HDL                                   |
| Brehm, 2003                              | American Heart Association                                                                                        | NR     | NS                     | NS                                         |
| Brinkworth, 2009                         | National Heart Foundation                                                                                         | None   | NS                     | NS                                         |
| Daly, 2006                               | Diabetes UK                                                                                                       | NR     | Weight, HDL            | Blood pressure                             |
| Lasker, 2008                             | National Cattleman's Beef Association, The Beef Board and Kraft Foods                                             | Note 4 | Lipid                  | Not relevant                               |
| Foster GD, 2010                          | National Institutes of Health                                                                                     | None   | Body weight            | LDL                                        |
| Foster, 2003                             | National Institutes of Health                                                                                     | Note 5 | Not relevant           | Changes in weight                          |
| Truby et al, 2006 and Morgan et al, 2008 | British Broadcasting Corporation                                                                                  | None   | NS                     | NS                                         |

|                                        |                                                                                                                         |        |                                       |                           |
|----------------------------------------|-------------------------------------------------------------------------------------------------------------------------|--------|---------------------------------------|---------------------------|
| Volek, 2009                            | Graduate School and the Health Disparity EXPORT Center                                                                  | NR     | NS                                    | NS                        |
| Brehm, 2005                            | Atkins Foundation                                                                                                       | NR     | NS                                    | NS                        |
| Davis, 2009                            | The Robert C. Atkins Foundation and The Diabetes Research and Training Center, clinical and translational science award | None   | Weight                                | Blood pressure and lipids |
| Westman, 2008                          | Robert C. Atkins Foundation                                                                                             | None   | NS                                    | NS                        |
| McAuley, 2005                          | Health Research Council of New Zealand                                                                                  | None   | NS                                    | NS                        |
| Dansinger, 2005                        | General Clinical Research Center                                                                                        | Note 6 | Change from baseline weight at 1 year | Not relevant              |
| Yancy, 2004                            | Atkins Foundation                                                                                                       | Note 7 | Body weight                           | Not relevant              |
| Aldana, 2007                           | Excellence in Academic Medicine Act of The State of Minis                                                               | NR     | NS                                    | NS                        |
| Blumenthal, 2000                       | National Institutes of Health                                                                                           | NR     | weight loss                           | Not relevant              |
| Brinkworth, 2004                       | Meadow Lea Foods                                                                                                        | None   | NS                                    | NS                        |
| Das, 2007                              | National Institutes of Health                                                                                           | None   | Body weight                           | Not relevant              |
| Ebbeling, 2007                         | National Institute of Diabetes and Digestive and Kidney Diseases                                                        | None   | Body fat percentage                   | Not relevant              |
| Guldbrand, 2012                        | University Hospital of Linköping Research Funds                                                                         | None   | Weight                                | Not relevant              |
| Haufe, 2011, Haufe, 2012               | Federal Ministry of Education and Research                                                                              | None   | Weight loss                           | Not relevant              |
| Collins CE, 2010                       | Australian Research Council Linkage Project                                                                             | Note 8 | Not relevant                          | Weight, blood pressure    |
| Heshka, 2000                           | Weight Watchers International                                                                                           | Note 9 | Change in body weight                 | Blood pressure            |
| Jen et al, 2004 and Djuric et al, 2002 | Weight Watchers International                                                                                           | NR     | NS                                    | NS                        |
| Layman, 2005                           | Illinois Council on Food and Agriculture Research, National Cattlemen's Beef Association, The Beef Board, Kraft Foods   | NR     | NS                                    | NS                        |
| Layman, 2009                           | National Cattlemen's Beef Association                                                                                   | None   | HDL                                   | Changes in LDL            |
| Ello-Martin, 2007                      | National Institutes of Health                                                                                           | None   | Weight loss                           | Not relevant              |
| Stern et al, 2004 and                  | Veterans Affairs Healthcare Network Competitive Pilot Project Grant                                                     | None   | Weight loss                           | Serum lipid levels        |

|                    |                                                                                                                   |         |                       |                              |
|--------------------|-------------------------------------------------------------------------------------------------------------------|---------|-----------------------|------------------------------|
| Samaha et al, 2003 |                                                                                                                   |         |                       |                              |
| Thomson, 2010      | Robert C. and Veronica Atkins Foundation                                                                          | NR      | NS                    | NS                           |
| Yamada, 2014       | NR                                                                                                                | None    | Body weight           | Lipid levels, HDL, LDL       |
| Rock, 2007         | Jenny Craig Inc                                                                                                   | None    | NS                    | NS                           |
| Rock, 2010         | Jenny Craig Inc                                                                                                   | NR      | Weight loss           | Not relevant                 |
| Rippe, 1998        | Weight Watchers International                                                                                     | NR      | NS                    | NS                           |
| Womble, 2004       | Pilot Study Grant from the North American Association for the Study of Obesity                                    | NR      | Change in body weight | Not relevant                 |
| Jolly, 2011        | NHS South Birmingham                                                                                              | None    | NS                    | NS                           |
| Pinto, 2013        | National Institute of Diabetes and Digestive and Kidney Diseases                                                  | None    | Weight change         | Not relevant                 |
| Wadden, 2004       | National Institute of Diabetes Digestive and Kidney Disease                                                       | None    | NS                    | NS                           |
| Galletly, 2007     | NR                                                                                                                | NR      | NS                    | NS                           |
| Goodrick, 1998     | National Institute of Diabetes and Digestive and Kidney Diseases Grant                                            | NR      | Weight                | Not relevant                 |
| Luscombe, 2002     | Meadow Lea Foods                                                                                                  | NR      | NS                    | NS                           |
| Luscombe, 2003     | Health and Medical Research Grant and the Dairy Research and Development Corporation of Australia                 | NR      | NS                    | NS                           |
| Jenkins, 2014      | Solae, LLC, Loblaw Companies Limited                                                                              | Note 10 | Change in body weight | Not relevant                 |
| Kitabchi, 2013     | Medical Student Research Fellowship                                                                               | None    | NS                    | NS                           |
| Lim, 2010          | National Heart Foundation                                                                                         | None    | Differences in weight | Not relevant                 |
| Mellberg, 2014     | The Swedish Council for Working Life and Social Research                                                          | None    | NS                    | NS                           |
| Ornish, 1990       | National Heart, Lung, and Blood Institute                                                                         | NR      | NS                    | NS                           |
| Rock, 2014         | Jenny Craig Inc                                                                                                   | Note 11 | Weight change         | Not relevant                 |
| Sacks, 2009        | National Heart, Lung, and Blood Institute and the General Clinical Research Center, National Institutes of Health | None    | Change in body weight | Not relevant                 |
| Saslow, 2014       | William K. Bowes, Jr. Foundation                                                                                  | None    | Not relevant          | Changes in lipids and weight |
| Tay, 2014          | National Health and Medical Research Council                                                                      | None    | Not relevant          | Blood lipids and pressure    |
| Wycherley, 2012    | Meat and Livestock Australia                                                                                      | None    | NS                    | NS                           |
| Wycherley, 2013    | Meat and Livestock Australia                                                                                      | None    | NS                    | NS                           |

|                                |                                                                                                                                                                                                                                                                                                                                                                                                                                                                                                                                                                                                                                                                                                                                                            |         |                                    |                                       |
|--------------------------------|------------------------------------------------------------------------------------------------------------------------------------------------------------------------------------------------------------------------------------------------------------------------------------------------------------------------------------------------------------------------------------------------------------------------------------------------------------------------------------------------------------------------------------------------------------------------------------------------------------------------------------------------------------------------------------------------------------------------------------------------------------|---------|------------------------------------|---------------------------------------|
| Aude, 2004                     | Agatston Research Institute                                                                                                                                                                                                                                                                                                                                                                                                                                                                                                                                                                                                                                                                                                                                | NR      | Weight loss                        | Blood lipid levels                    |
| Johnston, 2013                 | Weight Watchers International                                                                                                                                                                                                                                                                                                                                                                                                                                                                                                                                                                                                                                                                                                                              | None    | Weight loss                        | Not relevant                          |
| Landers, 2002                  | NR                                                                                                                                                                                                                                                                                                                                                                                                                                                                                                                                                                                                                                                                                                                                                         | NR      | Weight loss                        | Not relevant                          |
| Panunzio, 2011                 | NR                                                                                                                                                                                                                                                                                                                                                                                                                                                                                                                                                                                                                                                                                                                                                         | NR      | NS                                 | NS                                    |
| Liu, 2013                      | Ministry of Science and Technology of China                                                                                                                                                                                                                                                                                                                                                                                                                                                                                                                                                                                                                                                                                                                | None    | NS                                 | NS                                    |
| Jebb, 2011                     | Weight Watchers International                                                                                                                                                                                                                                                                                                                                                                                                                                                                                                                                                                                                                                                                                                                              | None    | Weight change over 12 months       | Blood pressure                        |
| Ahern, 2017                    | National Prevention Research Initiative, Weight Watchers International                                                                                                                                                                                                                                                                                                                                                                                                                                                                                                                                                                                                                                                                                     | None    | Change in body weight at 12 months | Body weight at 3 months and 24 months |
| Guldbrand, 2014                | University Hospital of Linkoping Research Funds                                                                                                                                                                                                                                                                                                                                                                                                                                                                                                                                                                                                                                                                                                            | None    | NS                                 | NS                                    |
| Veum, 2017                     | Western Norway Regional Health Authority, Meltzerfondet, Bergen Medical Research Foundation, and the University of Bergen.                                                                                                                                                                                                                                                                                                                                                                                                                                                                                                                                                                                                                                 | None    | NS                                 | NS                                    |
| Hill, 2015                     | National Institutes of Health                                                                                                                                                                                                                                                                                                                                                                                                                                                                                                                                                                                                                                                                                                                              | None    | HDL, SBP, DBP                      | Not relevant                          |
| Foroozani, 2017                | Grant from Vice-chancellor for Research, Kashan University of Medical Sciences                                                                                                                                                                                                                                                                                                                                                                                                                                                                                                                                                                                                                                                                             | None    | NS                                 | NS                                    |
| Azadi, 2016                    | Shahid Sadoughi University of Medical Sciences                                                                                                                                                                                                                                                                                                                                                                                                                                                                                                                                                                                                                                                                                                             | None    | NS                                 | NS                                    |
| Ramprasad, 2014; Jenkins, 2011 | This work was supported by the CRCE of the Federal Government of Canada (Drs Jenkins, Jones, and Lamarche), CIHR, AFM Net, Loblaws Brands Ltd, Solae (St Louis, Missouri), and Unilever (Vlaardingen, the Netherlands, and Toronto, Ontario, Canada). Dr. Jenkins receives salary support as a Canada Research Chair from the federal government of Canada. Unilever Research and Development provided the donation of margarines used in the study and Can-Oat Milling, a division of Viterra Inc (Portage La Prairie, Manitoba, Canada), provided the generous donation of HiFi medium oat bran used for the study breads and funding for freezer acquisition. St Michael's Hospital Foundation provided funding for the production of the study booklet | Note 12 | NS                                 | NS                                    |
| Green, 2015                    | National Institute of Diabetes and Digestive and Kidney Diseases,                                                                                                                                                                                                                                                                                                                                                                                                                                                                                                                                                                                                                                                                                          | Note 13 | Weight change                      | Blood pressure                        |
| Ma, 2015                       | National Heart, Lung and Blood Institute, Palo Alto Medical Foundation Research Institute                                                                                                                                                                                                                                                                                                                                                                                                                                                                                                                                                                                                                                                                  | None    | NS                                 | NS                                    |

|                              |                                                                                                                                                                                                                                                                                                                                                                                                                                                                                                                                                                                                                                   |         |                       |                                            |
|------------------------------|-----------------------------------------------------------------------------------------------------------------------------------------------------------------------------------------------------------------------------------------------------------------------------------------------------------------------------------------------------------------------------------------------------------------------------------------------------------------------------------------------------------------------------------------------------------------------------------------------------------------------------------|---------|-----------------------|--------------------------------------------|
| Austel, 2015                 | Taste of Sweden Deutschland                                                                                                                                                                                                                                                                                                                                                                                                                                                                                                                                                                                                       | None    | NS                    | NS                                         |
| Abenavoli, 2017              | NR                                                                                                                                                                                                                                                                                                                                                                                                                                                                                                                                                                                                                                | None    | NS                    | NS                                         |
| Yang, 2016                   | Weight Watchers International                                                                                                                                                                                                                                                                                                                                                                                                                                                                                                                                                                                                     | NR      | Body weight change    | Not relevant                               |
| Baetge, 2017                 | Curves International                                                                                                                                                                                                                                                                                                                                                                                                                                                                                                                                                                                                              | None    | NS                    | NS                                         |
| Marrero, 2016                | Weight Watchers International                                                                                                                                                                                                                                                                                                                                                                                                                                                                                                                                                                                                     | Note 14 | Change in body weight | Blood pressure, HDL                        |
| Kafeshani, 2015              | Research Council of Food Security Research Center, Isfahan University of Medical Sciences                                                                                                                                                                                                                                                                                                                                                                                                                                                                                                                                         | None    | NS                    | NS                                         |
| Fito, 2014                   | Spanish Ministry of Health, Centro Nacional de Investigaciones Cardiovasculares                                                                                                                                                                                                                                                                                                                                                                                                                                                                                                                                                   | None    | NS                    | NS                                         |
| Brader, 2014; Uusitupa, 2013 | Supported by NordForsk NCoE in Food Nutrition and Health and by the Academy of Finland, Finnish Diabetes Research Foundation, Finnish Foundation for Cardiovascular Research, The Sigrid Juselius Foundation and EVO funding from Kuopio University Hospital (Finland); the Druvan Foundation, ESPEN and Ska <sup>n</sup> e University Hospital, The Heart–Lung Foundation, Diabetesfonden and Foundation Cerealia (Sweden); The Danish Council for Strategic Research (DairyHealth, BioFunCarb), Aarhus University (Denmark), The Agricultural Productivity Fund (Iceland) and the Icelandic Research Fund for graduate students | None    | NS                    | NS                                         |
| Davis, 2017a                 | National Health and Medical Research Council                                                                                                                                                                                                                                                                                                                                                                                                                                                                                                                                                                                      | None    | Blood pressure        | Not relevant                               |
| Jenkins, 2017                | Institute of Nutrition, Metabolism, Diabetes of the Canadian Institute for Health Research                                                                                                                                                                                                                                                                                                                                                                                                                                                                                                                                        | Note 15 | Body weight change    | Not relevant                               |
| O'Neil, 2016                 | Weight Watchers International                                                                                                                                                                                                                                                                                                                                                                                                                                                                                                                                                                                                     | Note 16 | Not relevant          | Weight change, cardiovascular risk factors |

Most of RCTs (90.98%) received funding support, in which 34.7% were funded in-part or in-whole by diet company. 57.8% reported that none of the authors declared a conflict of interest. 52.0% studies did not specify the primary outcome. 7.4% studies specified the primary outcomes that were not our targeted outcomes. 53.7% studies did not specify the secondary outcome. 21.5% studies specified the primary outcomes that were not our targeted outcomes.

Notes:

NR = not reported

NS = not specified (the outcomes didn't subdivided into the primary outcomes or secondary outcomes.)

“Not relevant” means that the primary/secondary outcomes reported in RCTs were not our targeted outcomes (our targeted outcomes include weight loss, SBP, DBP, LDL, HDL, and CRP).

\* means acronym undefined

Note 1: Bibus has received consulting fees from companies that make fish oil, Coromega Co., Vista, CA, and Enreco, Inc., Newton, WI. He also has equity ownership in Lipid Technologies, LLC, Austin, MN, the company that performed the plasma fatty acid analysis. Bibus owns patents related to lipid therapy. He has served as an expert witness regarding lipids and fatty acids.

Note 2: Ruth, Shah, Port, Bourland, Istfan, Nelson and Gokce have no competing interests. Apovian has served on the advisory boards for Allergan, Amylin, Orexigen, Merck, Johnson and Johnson, Abbott, Arena, Zafgen, Novo Nordisk and SanofiAventis and has received research funding from Lilly, Amylin, Pfizer, Sanofi-Aventis, Orexigen, MetaProteomics, and the Dr. Robert C. and Veronica Atkins Foundation.

Note 3: DRM and PAD have received research funding from the Sugar Bureau. SB has no competing interests to declare.

Note 4: DKL received grant/research support from the funding agencies for this research: the National Cattleman's Beef Association, The Beef Board and Kraft Foods.

Note 5: Dr. Foster reports having received consulting fees from Abbott Laboratories and HealtheTech and lecture fees from Abbott Laboratories and Roche Laboratories. Dr. Wyatt reports having received consulting fees from Ortho-McNeil, USANA, and GlaxoSmithKline and lecture fees from Roche Laboratories, Abbott Laboratories, Slim-Fast, and Ortho-McNeil. Dr. Hill reports having received consulting fees from HealtheTech, Johnson & Johnson, Procter & Gamble, Coca-Cola, and the International Life Sciences Institute; lecture fees from Abbott Laboratories, Roche Laboratories, and Kraft Foods; and grant support from M&M Mars, Procter & Gamble, and Abbott Laboratories. Dr. Szapary reports having received lecture fees from AstraZeneca and Kos Pharmaceuticals and grant support from AstraZeneca. Dr. Klein reports having received consulting fees from Roche Laboratories and HealtheTech, lecture fees from Ortho-McNeil, and grants from GlaxoSmithKline and Regeneron.

Note 6: The General Clinical Research Center scientific staff provided consultation in the design of the study. The General Clinical Research Center nursing staff provided assistance with the data collection. No sponsor participated in the analysis or interpretation of the data, manuscript preparation, review, or approval, or the decision to publish.

Note 7: Grants received: E.C. Westman (Robert C. Atkins Foundation); Grants pending: E.C. Westman and W.S. Yancy Jr. (Robert C. Atkins Foundation).

Note 8: CEC is a dietetic consultant to SP Health Co. M Neve received a PhD scholarship supplement from SP Health Co, and P Jones is employed as an Accredited Practising Dietitian by SP health Co. All other authors declare that they have no competing interests.

Note 9: Dr Anderson has received grants/research support from Abbott, AstraZeneca, Aventis, Bristol-Myers Squibb, GlaxoSmithKline, Health Management Resources, Johnson & Johnson, Kos, Merck, NutriPharma, Protein Technologies International, Procter&Gamble, Regeneron,

Roche, Schering- Plough, Tishcon, Weight Watchers, and Wyeth- Ayerst, has served as a consultant to GlaxoSmithKline, Health Management Resources, Johnson & Johnson, Knoll, NutriPharma, and Protein Technologies International, and has received honoraria from Abbott, Bristol- Myers Squibb, GlaxoSmithKline, NutriPharma, and Protein Technologies International; Dr Greenway is a consultant to Jenny Craig; and Dr Pi-Sunyer serves on the scientific advisory board for Weight Watchers

Note 10: DJAJ has served on the Scientific Advisory Board of Sanitarium Company, Agri-Culture and Agri-Food Canada (AAFC), Canadian Agriculture Policy Institute (CAPI), California Strawberry Commission, Loblaw Supermarket, Herbal Life International, Nutritional Fundamental for Health, Pacific Health Laboratories, Metagenics, Bayer Consumer Care, Orafti, Dean Foods, Kellogg's, Quaker Oats, Procter & Gamble, Coca-Cola, NuVal Griffin Hospital, Abbott, Pulse Canada, Saskatchewan Pulse Growers, and Canola Council of Canada; received honoraria for scientific advice from Sanitarium Company, Orafti, the Almond Board of California, the American Peanut Council, International Tree Nut Council Nutrition Research and Education Foundation and the Peanut Institute, Herbal Life International, Pacific Health Laboratories, Nutritional Fundamental for Health, Barilla, Metagenics, Bayer Consumer Care, Unilever Canada and Netherlands, Solae LLC, Oldways, Kellogg's, Quaker Oats, Procter & Gamble, Coca-Cola, NuVal Griffin Hospital, Abbott, Canola Council of Canada, Dean Foods, California Strawberry Commission, Haine Celestial, Pepsi, and Alpro Foundation; has been on the speakers panel for the Almond Board of California; received research grants from Saskatchewan Pulse Growers, the Agricultural Bioproducts Innovation Program (ABIP) through the Pulse Research Network (PURENet), Advanced Food Materials Network (AFMNet), Loblaw, Unilever, Barilla, Almond Board of California, Coca-Cola, Solae LLC, Haine Celestial, Sanitarium Company, Orafti, International Tree Nut Council Nutrition Research and Education Foundation and the Peanut Institute, the Canola and Flax Councils of Canada, Calorie Control Council, Canadian Institutes of Health Research (CIHR), Canada Foundation for Innovation, and the Ontario Research Fund; and received travel support to meetings from the Solae LLC, Sanitarium Company, Orafti, AFMNet, Coca-Cola, The Canola and Flax Councils of Canada, Oldways Preservation Trust, Kellogg's, Quaker Oats, Griffin Hospital, Abbott Laboratories, Dean Foods, the California Strawberry Commission, American Peanut Council, Herbal Life International, Nutritional Fundamental for Health, Metagenics, Bayer Consumer Care, AAFC, CAPI, Pepsi, Almond Board of California, Unilever, Alpro Foundation, International Tree Nut Council, Barilla, Pulse Canada, and the Saskatchewan Pulse Growers. CWCK reported being on speakers bureaus for Almond Board of California, Solae LLC, and Unilever; and receiving research grants from CIHR, Unilever, Solae LLC, Loblaw Brands Ltd, International Tree Nut Council, and Almond Board of California. EV has received partial salary funding from research grants provided by Unilever, Loblaws, and the Almond Board of California. GP, RM and ESK are employees of Solae, LLC. JMWW was a recipient of a Canadian Institutes of Health Research (CIHR) Doctoral Research Award and is now a holder of a CIHR randomised controlled trials—mentoring program Training Grant.

Note 11: By contractual agreement, scientists at UCSD and the University of Minnesota have responsibility and independence regarding data management, analysis, and publication. The sponsor contributed to the development of the design and protocol through discussions with the investigators during the development phase of the study. The funding sponsor had no role in

the conduct of the study; collection, management, analysis, and interpretation of the data; preparation, review, or approval of the manuscript (except for verifying the specific weight loss program activities that comprised the intervention); and decision to submit the manuscript for publication. No other potential conflicts of interest relevant to this article were reported.

Note 12: Dr. Ramprasath reported receiving grants from CRCE of the Federal Government of Canada, CIHR, AFM Net, Loblaw Brands Ltd, Solae, and Unilever. Dr. Jenkins reported serving on the Scientific Advisory Board of Unilever, Sanitarium Company, California Strawberry Commission, Loblaw Supermarket, Herbal Life International, Nutritional Fundamental for Health, Pacific Health Laboratories, Metagenics, Bayer Consumer Care, Orafiti, Dean Foods, Kellogg's, Quaker Oats, Procter & Gamble, Coca-Cola, NuVal Griffin Hospital, Abbott, Pulse Canada, Saskatchewan Pulse Growers, and Canola Council of Canada; receiving honoraria for scientific advice from the Almond

Board of California, International Tree Nut Council Nutrition Research and Education Foundation, Barilla, Unilever Canada, Solae, Oldways, Kellogg's, Quaker Oats, Procter & Gamble, Coca-Cola, NuVal Griffin Hospital, Abbott, Canola Council of Canada, Dean Foods, California Strawberry Commission, Haine Celestial, and Alpro Foundation; being on the speakers panel for the Almond Board of California; receiving research grants from Loblaw Brands Ltd, Unilever, Barilla, Almond Board of California, Solae, Haine Celestial, Sanitarium Company, Orafiti, International Tree Nut Council, and Peanut Institute; and receiving travel support to meetings from the Almond Board of California, Unilever, Alpro Foundation, and International Tree Nut Council. Dr. Jenkins' wife is a director of Glycemic Index Laboratories, Toronto, Ontario, Canada, and his sister, Caroline Brydson, contributed to the diet booklet used in the study, which may in the future be expanded to book form for the general public. Dr. Jones reported receiving grants from the Canadian Institutes of Health Research (CIHR), Canada Research Chair Endowment (CRCE) of the Federal Government of Canada, Advanced Foods and Materials Network (AFM Net), Danone, Enzymotec, and Unilever. Dr. Jones also serves as president of Nutritional Fundamentals for Health Inc, which markets plant sterols among other nutraceuticals. Dr. Lamarche reported receiving grants from CIHR and AFM Net, being a consultant and on speakers bureaus for Danone, and receiving royalties from Atrium Innovations. Dr. Kendall reported being on speakers bureaus for Almond Board of California, Solae, and Unilever; and receiving research grants from CIHR, Unilever, Solae, Loblaw Brands Ltd, International Tree Nut Council, and Almond Board of California. Dr. Faulkner reported receiving grants from CRCE of the Federal Government of Canada, CIHR, AFM Net, Loblaw Brands Ltd, Unilever, and Solae. Ms. Cermakova reported receiving grants from CRCE of the Federal Government of Canada, CIHR, AFM Net, Loblaw Brands Ltd, Unilever, Solae, and Viterra Food Processing-Oat and Specialty Grain Milling. Dr. de Souza reported receiving grants from Coca-Cola, Calorie Control Council, and CIHR. Mr. Ireland reported receiving grants from CRCE of the Federal Government of Canada, CIHR, AFM Net, Loblaw Brands Ltd, Solae, and Unilever. Ms. Patel reported receiving grants from CRCE of the Federal Government of Canada, CIHR, AFM Net, Loblaw Brands Ltd, Solae, and Unilever. Dr. Bashyam reported receiving grants from CIHR, CRCE of the Federal Government of Canada, AFM Net, Loblaw Brands Ltd, Solae, and Unilever. No other authors reported any conflict of interest.

Note 13: Dr. Green has received grant support from AHRQ, the Kaiser Permanente Center for Safety and Effectiveness Research, the Kaiser Permanente Community Benefit Initiative, NIDA,



NIDDK, NIH, NIMH, and Purdue Pharma; she has also provided research consultation for The Industry PMR (the Industry PMR consortium is comprised of Actavis, Endo Pharmaceuticals, Janssen Pharmaceuticals, Mallinckrodt, Pfizer, Purdue Pharma, Rhodes Pharmaceuticals, Roxane Laboratories, and Zogenix). Dr. Yarborough has received grant support from AHRQ, the Kaiser Permanente Center for Safety and Effectiveness Research, the Kaiser Permanente Community Benefit Initiative, NCCAM, NIDA, NIDDK, NIMH, and Purdue Pharma. Dr. Leo has received funding from GenomeDX Biosciences and Pfizer. Mr. Yarborough has received grant support from the Kaiser Permanente Community Benefit Initiative, NIDDK, NIMH, and Purdue Pharma. Mr. Stumbo has received grant support from AHRQ, the Health Resources and Services Administration, the Kaiser Permanente Community Benefit Initiative, the Lucile Packard Foundation for Children's Health, Maternal and Child Health Bureau, NCCAM, NIDDK, NIMH, and Purdue Pharma. Ms. Janoff has received grant support from AHRQ, the Kaiser Permanente Center for Safety and Effectiveness Research, NIDA, NIDDK, NIMH, and Purdue Pharma. Dr. Perrin has received grant support from AHRQ, the Centers for Disease Control and Prevention, the Kaiser Permanente Community Benefit Initiative, Kaiser Permanente Northwest, Merck, NCCAM, NCI, NCMHD, NHLBI, NIA, NICHD, NIDA, NIDDK, NIMH, NINR, NIOSH, Purdue Pharma, and the Veterans Administration. Dr. Nichols has received grant support from AHRQ, AstraZeneca, Bristol-Myers Squibb, GlaxoSmithKline, NHLBI, NIDDK, NIH, Novartis Pharmaceuticals, and Merck. Dr. Stevens has received grant support from AHRQ, NCCAM, NCI, NCRR, NHLBI, NICHD, NIDDK, NIH, and Kaiser Permanente Northwest.

Note 14: K. Miller-Kovach and G. D. Foster are both employed by Weight Watchers International

Note 15: Food items for the food basket were contributed by Loblaw Cos. Ltd., Alberta Barley Commission, Almond Board of CA, Barilla, ConAgra Foods, Earth's Own Food Co. Inc., International Nut Council, Kellogg Co., Mars Canada, Pepsi-QTG Canada, Puresource Natural Products, and So Soyab Inc. Dr. Jenkins has received research grants from Saskatchewan Pulse Growers, Agricultural Bioproducts Innovation Program through the Pulse Research Network, Advanced Foods and Material Network, Loblaw Cos. Ltd., Unilever, Barilla, Almond Board of CA, Agriculture and Agri-food Canada, Pulse Canada, Kellogg's Co., Canada, Quaker Oats, Canada, Procter & Gamble Technical Centre Ltd., Bayer Consumer Care, Pepsi/Quaker, International Nut & Dried Fruit, Soy Foods Association of North America, Coca-Cola Co. (investigator-initiated, unrestricted grant), Solae, Haine Celestial, Sanitarium Co., Orafti, International Tree Nut Council Nutrition Research and Education Foundation, Peanut Institute, Canola and Flax Councils of Canada, Canola Council of Canada, Canadian Institutes of Health Research, Canada Foundation for Innovation and Ontario Research Fund; and has served on the speaker's panel and scientific advisory board and has received travel support and honoraria from Almond Board of California, Canadian Agriculture Policy Institute, Loblaw Cos. Ltd., Griffin Hospital, Coca-Cola Co., Epicure, Danone, Saskatchewan Pulse Growers, Sanitarium Co., Orafti, American Peanut Council, International Tree Nut Council Nutrition Research and Education Foundation, Peanut Institute, Herbalife International, Pacific Health Laboratories, Nutritional Fundamental for Health, Metagenics, Bayer Consumer Care, Unilever Canada and Netherlands, Solae, Kellogg, Quaker Oats, Griffin Hospital, Abbott Laboratories, Dean Foods, California Strawberry Commission, Haine Celestial, PepsiCo, Alpro Foundation, Pioneer Hi-Bred International, DuPont Nutrition and Health, Spherix Consulting and WhiteWave Foods, Advanced Foods and Material Network,

Canola and Flax Councils of Canada, Nutritional Fundamentals for Health, Agri-Culture and Agri-Food Canada, the Canadian Agri-Food Policy Institute, Pulse Canada, Saskatchewan Pulse Growers, Soy Foods Association of North America, Nutrition Foundation of Italy, Nutra-Source Diagnostics, McDougall Program, Toronto Knowledge Translation Group (St. Michael's Hospital), Canadian College of Naturopathic Medicine, Hospital for Sick Children, Canadian Nutrition Society, American Society of Nutrition, Arizona State University, Paolo Sorbini Foundation and Institute of Nutrition, Metabolism, and Diabetes; and has received honoraria from U.S. Department of Agriculture; and has received the 2013 Award for Excellence in Research from the International Nut and Dried Fruit Council; and has received funding and travel support from Canadian Society of Endocrinology and Metabolism. Dr. de Souza has received personal fees from World Health Organization, Canadian Institutes for Health Research/Health Canada; and grants from Dietitians of Canada and Canadian Institutes for Health Research. Amy Jenkins is an employee of Vineland Research and Innovation Centre, a not-for-profit organization.

Note 16: PMO received grants from Orexigen Therapeutics, WWI, and Novo Nordisk; served on advisory groups for Novo Nordisk, Medscape/WebMD, Pfizer, and Janssen; and received honoraria from Novo Nordisk, Vindico CME, and Medscape/WebMD. TAW, KF, PLH, RFK, WTG, DMR, RJM, DW, WJR, and JLS received funding from MUSC to conduct this research at their sites. TAW received grants from Novo Nordisk and Nutrisystem; served on advisory boards for Orexigen.

Table S5: Summary of risk of bias by network nodes

| Popular diets                         |             | Atkins (n=36)  |       |                 |       | DASH (n=18)    |       |                |      | Jenny Craig (n=4) |       |
|---------------------------------------|-------------|----------------|-------|-----------------|-------|----------------|-------|----------------|------|-------------------|-------|
| Individual RoB item                   | Overall RoB | Low RoB (n=23) |       | High RoB (n=13) |       | Low RoB (n=17) |       | High RoB (n=1) |      | Low RoB (n=4)     |       |
|                                       |             | n              | %     | n               | %     | n              | %     | n              | %    | n                 | %     |
| Sequence generation                   | Low         | 17             | 47.2% | 8               | 22.2% | 14             | 77.8% | 1              | 5.6% | 3                 | 75.0% |
|                                       | Unclear     | 6              | 16.7% | 5               | 13.9% | 3              | 16.7% | 0              | 0.0% | 1                 | 25.0% |
|                                       | High        | 0              | 0.0%  | 0               | 0.0%  | 0              | 0.0%  | 0              | 0.0% | 0                 | 0.0%  |
| Allocation concealment                | Low         | 15             | 41.7% | 0               | 0.0%  | 9              | 50.0% | 0              | 0.0% | 1                 | 25.0% |
|                                       | Unclear     | 8              | 22.2% | 13              | 36.1% | 7              | 38.9% | 1              | 5.6% | 3                 | 75.0% |
|                                       | High        | 0              | 0.0%  | 0               | 0.0%  | 1              | 5.6%  | 0              | 0.0% | 0                 | 0.0%  |
| Blinding (participants and personnel) | Low         | 5              | 13.9% | 2               | 5.6%  | 7              | 38.9% | 0              | 0.0% | 2                 | 50.0% |
|                                       | Unclear     | 12             | 33.3% | 8               | 22.2% | 4              | 22.2% | 0              | 0.0% | 1                 | 25.0% |
|                                       | High        | 6              | 16.7% | 3               | 8.3%  | 6              | 33.3% | 1              | 5.6% | 1                 | 25.0% |
| Blinding (outcome assessors)          | Low         | 7              | 19.4% | 4               | 11.1% | 10             | 55.6% | 0              | 0.0% | 1                 | 25.0% |
|                                       | Unclear     | 12             | 33.3% | 7               | 19.4% | 7              | 38.9% | 1              | 5.6% | 2                 | 50.0% |
|                                       | High        | 4              | 11.1% | 2               | 5.6%  | 0              | 0.0%  | 0              | 0.0% | 1                 | 25.0% |
| Incomplete outcome data               | Low         | 16             | 44.4% | 0               | 0.0%  | 15             | 83.3% | 0              | 0.0% | 3                 | 75.0% |
|                                       | Unclear     | 2              | 5.6%  | 0               | 0.0%  | 2              | 11.1% | 1              | 5.6% | 1                 | 25.0% |
|                                       | High        | 5              | 13.9% | 13              | 36.1% | 0              | 0.0%  | 0              | 0.0% | 0                 | 0.0%  |

Table S5 continued: Summary of risk of bias by network nodes

| Popular diets                         |             | Mediterranean (n=30) |       |                |       | Ornish (n=4)  |       | Paleolithic (n=2) |        |
|---------------------------------------|-------------|----------------------|-------|----------------|-------|---------------|-------|-------------------|--------|
|                                       | Overall RoB | Low RoB (n=27)       |       | High RoB (n=3) |       | Low RoB (n=4) |       | Low RoB (n=2)     |        |
| Individual RoB item                   |             | n                    | %     | n              | %     | n             | %     | n                 | %      |
| Sequence generation                   | Low         | 19                   | 63.3% | 0              | 0.0%  | 2             | 50.0% | 2                 | 100.0% |
|                                       | Unclear     | 8                    | 26.7% | 3              | 10.0% | 2             | 50.0% | 0                 | 0.0%   |
|                                       | High        | 0                    | 0.0%  | 0              | 0.0%  | 0             | 0.0%  | 0                 | 0.0%   |
| Allocation concealment                | Low         | 12                   | 40.0% | 0              | 0.0%  | 2             | 50.0% | 2                 | 100.0% |
|                                       | Unclear     | 15                   | 50.0% | 3              | 10.0% | 2             | 50.0% | 0                 | 0.0%   |
|                                       | High        | 0                    | 0.0%  | 0              | 0.0%  | 0             | 0.0%  | 0                 | 0.0%   |
| Blinding (participants and personnel) | Low         | 10                   | 33.3% | 0              | 0.0%  | 3             | 75.0% | 2                 | 100.0% |
|                                       | Unclear     | 12                   | 40.0% | 3              | 10.0% | 0             | 0.0%  | 0                 | 0.0%   |
|                                       | High        | 5                    | 16.7% | 0              | 0.0%  | 1             | 25.0% | 0                 | 0.0%   |
| Blinding (outcome assessors)          | Low         | 8                    | 26.7% | 1              | 3.3%  | 3             | 75.0% | 1                 | 50.0%  |
|                                       | Unclear     | 19                   | 63.3% | 2              | 6.7%  | 1             | 25.0% | 1                 | 50.0%  |
|                                       | High        | 0                    | 0.0%  | 0              | 0.0%  | 0             | 0.0%  | 0                 | 0.0%   |
| Incomplete outcome data               | Low         | 24                   | 80.0% | 0              | 0.0%  | 3             | 75.0% | 2                 | 100.0% |
|                                       | Unclear     | 1                    | 3.3%  | 0              | 0.0%  | 0             | 0.0%  | 0                 | 0.0%   |
|                                       | High        | 2                    | 6.7%  | 3              | 10.0% | 1             | 25.0% | 0                 | 0.0%   |

Table S5 continued: Summary of risk of bias by network nodes

| Popular diets                         |             | Portfolio (n=1) |        | Rosemary Conley (n=2) |       |                |       | Slimming World (n=1) |        | South Beach (n=1) |        |
|---------------------------------------|-------------|-----------------|--------|-----------------------|-------|----------------|-------|----------------------|--------|-------------------|--------|
|                                       | Overall RoB | Low RoB (n=1)   |        | Low RoB (n=1)         |       | High RoB (n=1) |       | Low RoB (n=1)        |        | Low RoB (n=1)     |        |
| Individual RoB item                   |             | n               | %      | n                     | %     | n              | %     | n                    | %      | n                 | %      |
| Sequence generation                   | Low         | 1               | 100.0% | 0                     | 0.0%  | 0              | 0.0%  | 0                    | 0.0%   | 0                 | 0.0%   |
|                                       | Unclear     | 0               | 0.0%   | 1                     | 50.0% | 1              | 50.0% | 1                    | 100.0% | 1                 | 100.0% |
|                                       | High        | 0               | 0.0%   | 0                     | 0.0%  | 0              | 0.0%  | 0                    | 0.0%   | 0                 | 0.0%   |
| Allocation concealment                | Low         | 1               | 100.0% | 1                     | 50.0% | 0              | 0.0%  | 1                    | 100.0% | 0                 | 0.0%   |
|                                       | Unclear     | 0               | 0.0%   | 0                     | 0.0%  | 1              | 50.0% | 0                    | 0.0%   | 1                 | 100.0% |
|                                       | High        | 0               | 0.0%   | 0                     | 0.0%  | 0              | 0.0%  | 0                    | 0.0%   | 0                 | 0.0%   |
| Blinding (participants and personnel) | Low         | 0               | 0.0%   | 0                     | 0.0%  | 0              | 0.0%  | 0                    | 0.0%   | 0                 | 0.0%   |
|                                       | Unclear     | 0               | 0.0%   | 0                     | 0.0%  | 0              | 0.0%  | 0                    | 0.0%   | 1                 | 100.0% |
|                                       | High        | 1               | 100.0% | 1                     | 50.0% | 1              | 50.0% | 1                    | 100.0% | 0                 | 0.0%   |
| Blinding (outcome assessors)          | Low         | 1               | 100.0% | 1                     | 50.0% | 0              | 0.0%  | 1                    | 100.0% | 1                 | 100.0% |
|                                       | Unclear     | 0               | 0.0%   | 0                     | 0.0%  | 0              | 0.0%  | 0                    | 0.0%   | 0                 | 0.0%   |
|                                       | High        | 0               | 0.0%   | 0                     | 0.0%  | 1              | 50.0% | 0                    | 0.0%   | 0                 | 0.0%   |
| Incomplete outcome data               | Low         | 1               | 100.0% | 0                     | 0.0%  | 0              | 0.0%  | 0                    | 0.0%   | 1                 | 100.0% |
|                                       | Unclear     | 0               | 0.0%   | 0                     | 0.0%  | 0              | 0.0%  | 0                    | 0.0%   | 0                 | 0.0%   |
|                                       | High        | 0               | 0.0%   | 1                     | 50.0% | 1              | 50.0% | 1                    | 100.0% | 0                 | 0.0%   |

Table S5 continued: Summary of risk of bias by network nodes

| Popular diets                         |             | Biggest Loser (n=1) |         | Volumetric s (n=1) |         | Weight Watchers (n=14) |        |                |        | Zone (n=16)    |        |                |        |
|---------------------------------------|-------------|---------------------|---------|--------------------|---------|------------------------|--------|----------------|--------|----------------|--------|----------------|--------|
|                                       | Overall RoB | Low RoB (n=1)       |         | High RoB (n=1)     |         | Low RoB (n=10)         |        | High RoB (n=4) |        | Low RoB (n=11) |        | High RoB (n=5) |        |
| Individual RoB item                   |             | n                   | %       | n                  | %       | n                      | %      | n              | %      | n              | %      | n              | %      |
| Sequence generation                   | Low         | 1                   | 100.0 % | 0                  | 0.0%    | 6                      | 42.9 % | 1              | 7.1%   | 6              | 37.5 % | 1              | 6.3%   |
|                                       | Unclear     | 0                   | 0.0%    | 1                  | 100.0 % | 4                      | 28.6 % | 3              | 21.4 % | 3              | 18.8 % | 4              | 25.0 % |
|                                       | High        | 0                   | 0.0%    | 0                  | 0.0%    | 0                      | 0.0%   | 0              | 0.0%   | 2              | 12.5 % | 0              | 0.0%   |
| Allocation concealment                | Low         | 1                   | 100.0 % | 0                  | 0.0%    | 6                      | 42.9 % | 0              | 0.0%   | 4              | 25.0 % | 0              | 0.0%   |
|                                       | Unclear     | 0                   | 0.0%    | 1                  | 100.0 % | 3                      | 21.4 % | 4              | 28.6 % | 7              | 43.8 % | 5              | 31.3 % |
|                                       | High        | 0                   | 0.0%    | 0                  | 0.0%    | 1                      | 7.1%   | 0              | 0.0%   | 0              | 0.0%   | 0              | 0.0%   |
| Blinding (participants and personnel) | Low         | 0                   | 0.0%    | 0                  | 0.0%    | 2                      | 14.3 % | 0              | 0.0%   | 4              | 25.0 % | 0              | 0.0%   |
|                                       | Unclear     | 0                   | 0.0%    | 0                  | 0.0%    | 3                      | 21.4 % | 1              | 7.1%   | 4              | 25.0 % | 5              | 31.3 % |
|                                       | High        | 1                   | 100.0 % | 1                  | 100.0 % | 5                      | 35.7 % | 3              | 21.4 % | 3              | 18.8 % | 0              | 0.0%   |
| Blinding (outcome assessors)          | Low         | 1                   | 100.0 % | 0                  | 0.0%    | 4                      | 28.6 % | 2              | 14.3 % | 5              | 31.3 % | 0              | 0.0%   |
|                                       | Unclear     | 0                   | 0.0%    | 1                  | 100.0 % | 5                      | 35.7 % | 1              | 7.1%   | 5              | 31.3 % | 5              | 31.3 % |
|                                       | High        | 0                   | 0.0%    | 0                  | 0.0%    | 1                      | 7.1%   | 1              | 7.1%   | 1              | 6.3%   | 0              | 0.0%   |
| Incomplete outcome data               | Low         | 1                   | 100.0 % | 0                  | 0.0%    | 7                      | 50.0 % | 0              | 0.0%   | 8              | 50.0 % | 0              | 0.0%   |
|                                       | Unclear     | 0                   | 0.0%    | 0                  | 0.0%    | 0                      | 0.0%   | 0              | 0.0%   | 1              | 6.3%   | 0              | 0.0%   |
|                                       | High        | 0                   | 0.0%    | 1                  | 100.0 % | 3                      | 21.4 % | 4              | 28.6 % | 2              | 12.5 % | 5              | 31.3 % |

Table S5 continued: Summary of risk of bias by network nodes

| Popular diets                         |             | Usual diet (n=31) |       |                |       | Dietary advice (n=26) |       |                |       | Low fat (n=72) |       |                 |       |
|---------------------------------------|-------------|-------------------|-------|----------------|-------|-----------------------|-------|----------------|-------|----------------|-------|-----------------|-------|
| Individual RoB item                   | Overall RoB | Low RoB (n=25)    |       | High RoB (n=6) |       | Low RoB (n=22)        |       | High RoB (n=4) |       | Low RoB (n=51) |       | High RoB (n=21) |       |
|                                       |             | n                 | %     | n              | %     | n                     | %     | n              | %     | n              | %     | n               | %     |
| Sequence generation                   | Low         | 18                | 58.1% | 2              | 6.5%  | 10                    | 38.5% | 1              | 3.8%  | 32             | 44.4% | 9               | 12.5% |
|                                       | Unclear     | 7                 | 22.6% | 4              | 12.9% | 12                    | 46.2% | 3              | 11.5% | 17             | 23.6% | 12              | 16.7% |
|                                       | High        | 0                 | 0.0%  | 0              | 0.0%  | 0                     | 0.0%  | 0              | 0.0%  | 2              | 2.8%  | 0               | 0.0%  |
| Allocation concealment                | Low         | 10                | 32.3% | 0              | 0.0%  | 8                     | 30.8% | 0              | 0.0%  | 25             | 34.7% | 0               | 0.0%  |
|                                       | Unclear     | 14                | 45.2% | 6              | 19.4% | 13                    | 50.0% | 4              | 15.4% | 26             | 36.1% | 21              | 29.2% |
|                                       | High        | 1                 | 3.2%  | 0              | 0.0%  | 1                     | 3.8%  | 0              | 0.0%  | 0              | 0.0%  | 0               | 0.0%  |
| Blinding (participants and personnel) | Low         | 8                 | 25.8% | 0              | 0.0%  | 4                     | 15.4% | 0              | 0.0%  | 14             | 19.4% | 2               | 2.8%  |
|                                       | Unclear     | 10                | 32.3% | 4              | 12.9% | 9                     | 34.6% | 4              | 15.4% | 27             | 37.5% | 15              | 20.8% |
|                                       | High        | 7                 | 22.6% | 2              | 6.5%  | 9                     | 34.6% | 0              | 0.0%  | 10             | 13.9% | 4               | 5.6%  |
| Blinding (outcome assessors)          | Low         | 11                | 35.5% | 1              | 3.2%  | 8                     | 30.8% | 1              | 3.8%  | 18             | 25.0% | 5               | 6.9%  |
|                                       | Unclear     | 14                | 45.2% | 4              | 12.9% | 12                    | 46.2% | 3              | 11.5% | 29             | 40.3% | 15              | 20.8% |
|                                       | High        | 0                 | 0.0%  | 1              | 3.2%  | 2                     | 7.7%  | 0              | 0.0%  | 4              | 5.6%  | 1               | 1.4%  |
| Incomplete outcome data               | Low         | 22                | 71.0% | 0              | 0.0%  | 20                    | 76.9% | 0              | 0.0%  | 40             | 55.6% | 0               | 0.0%  |
|                                       | Unclear     | 0                 | 0.0%  | 0              | 0.0%  | 0                     | 0.0%  | 0              | 0.0%  | 5              | 6.9%  | 0               | 0.0%  |
|                                       | High        | 3                 | 9.7%  | 6              | 19.4% | 2                     | 7.7%  | 4              | 15.4% | 6              | 8.3%  | 21              | 29.2% |

Table S6: GRADE assessment for 6-month weight loss in macronutrient composition NMA

| Comparison groups |                | Direct evidence |                 |             |                      |         |               |              |                  |                                   |             |                                |                                       |                        |
|-------------------|----------------|-----------------|-----------------|-------------|----------------------|---------|---------------|--------------|------------------|-----------------------------------|-------------|--------------------------------|---------------------------------------|------------------------|
| Arm 1             | Arm 2 (Ref)    | No. of study    | No. of patients | I-square, % | MD (95%CrI)          | RoB     | Inconsistency | Indirectness | Publication bias | Direct rating without imprecision | Imprecision | Direct rating with imprecision | Direct is more precise than indirect? | Need to rate indirect? |
| Dietary advice    | Usual diet     | 1               | 185             | NA          | -0.79 (-5.23, 3.65)  | No      | No            | No           | Undetected       | High                              | V serious   | Low                            | No                                    | Yes                    |
| Low fat           | Usual diet     | 4               | 854             | 88.9        | 5.10 (2.73, 7.47)    | No      | Serious       | No           | Undetected       | Mod                               | No          | Mod                            | No                                    | Yes                    |
| Low CHO           | Usual diet     | 1               | 168             | NA          | 9.78 (-0.77, 20.30)  | Serious | No            | No           | Undetected       | Mod                               | V serious   | V low                          | No                                    | Yes                    |
| Moderate Macro    | Usual diet     | 18              | 2373            | 92.9        | 2.80 (1.72, 3.91)    | No      | Serious       | No           | Undetected       | Mod                               | No          | Mod                            | Yes                                   | Yes                    |
| Low fat           | Dietary advice |                 |                 |             |                      |         |               |              |                  |                                   |             |                                |                                       |                        |
| Low CHO           | Dietary advice |                 |                 |             |                      |         |               |              |                  |                                   |             |                                |                                       |                        |
| Moderate Macro    | Dietary advice | 9               | 2841            | 93.7        | 2.99 (1.51, 4.46)    | No      | Serious       | No           | Undetected       | Mod                               | No          | Mod                            | NA                                    | NA                     |
| Low CHO           | Low fat        | 6               | 436             | 0.0         | 0.73 (-1.16, 2.62)   | No      | No            | No           | Undetected       | High                              | Serious     | Mod                            | No                                    | Yes                    |
| Moderate Macro    | Low fat        | 11              | 963             | 92.6        | -1.47 (-2.83, -0.11) | No      | Serious       | No           | Undetected       | Mod                               | Serious     | Low                            | Yes                                   | Yes                    |
| Moderate Macro    | Low CHO        | 44              | 3533            | 73.1        | -1.46 (-2.22, -0.72) | No      | Serious       | No           | Undetected       | Mod                               | No          | Mod                            | Yes                                   | Yes                    |



Table S6 continued: GRADE assessment for 6-month weight loss in macronutrient composition NMA

| Comparison groups |                | Indirect evidence   |                                           |                      |                |                                     |             |                                  | Network evidence     |                      |                                                          |             |                 |                      |
|-------------------|----------------|---------------------|-------------------------------------------|----------------------|----------------|-------------------------------------|-------------|----------------------------------|----------------------|----------------------|----------------------------------------------------------|-------------|-----------------|----------------------|
| Arm 1             | Arm 2 (Ref)    | MD (95%CrI)         | First order loop of the most contribution | Low est of C1 and C2 | Intransitivity | Indirect rating without imprecision | Imprecision | Indirect rating with imprecision | MD (95%CrI)          | Incoherence, P-value | Higher rating of direct and indirect without imprecision | Incoherence | NMA Imprecision | Final network rating |
| Dietary advice    | Usual diet     | 0.07 (-1.79, 1.94)  | Moder Macro                               | Mod                  | No             | Mod                                 | Serious     | Low                              | 0.02 (-1.72, 1.78)   | 0.756                | High                                                     | No          | Serious         | Mod                  |
| Low fat           | Usual diet     | 3.98 (2.31, 5.69)   | Moder Macro                               | Mod                  | No             | Mod                                 | No          | Mod                              | 4.36 (3.03, 5.73)    | 0.579                | Mod                                                      | No          | No              | Mod                  |
| Low CHO           | Usual diet     | 4.45 (3.22, 5.69)   | Moder Macro                               | Mod                  | No             | Mod                                 | No          | Mod                              | 4.63 (3.42, 5.87)    | 0.145                | Mod                                                      | No          | No              | Mod                  |
| Moderate Macro    | Usual diet     | 6.02 (1.74, 10.30)  | Low carb, low fat                         | Mod                  | Serious        | Low                                 | No          | Low                              | 3.06 (2.05, 4.10)    | 0.147                | Mod                                                      | No          | No              | Mod                  |
| Low fat           | Dietary advice | 4.35 (2.56, 6.15)   | Moder Macro                               | Mod                  | No             | Mod                                 | No          | Mod                              | 4.35 (2.56, 6.15)    | NA                   | Mod                                                      | No          | No              | Mod                  |
| Low CHO           | Dietary advice | 4.61 (3.01, 6.23)   | Moder Macro                               | Mod                  | No             | Mod                                 | No          | Mod                              | 4.61 (3.01, 6.23)    | NA                   | Mod                                                      | No          | No              | Mod                  |
| Moderate Macro    | Dietary advice |                     |                                           |                      |                |                                     |             |                                  | 3.04 (1.60, 4.48)    | NA                   | Mod                                                      | No          | No              | Mod                  |
| Low CHO           | Low fat        | -0.11 (-1.66, 1.45) | Moder Macro                               | Mod                  | No             | Mod                                 | Serious     | Low                              | 0.27 (-0.91, 1.44)   | 0.502                | High                                                     | No          | Serious         | Mod                  |
| Moderate Macro    | Low fat        | -1.37 (-3.54, 0.79) | Low carb                                  | Mod                  | No             | Mod                                 | Serious     | Low                              | -1.30 (-2.40, -0.22) | 0.935                | Mod                                                      | No          | Serious         | Low                  |
| Moderate Macro    | Low CHO        | -2.46 (-5.06, 0.14) | Low fat                                   | Mod                  | No             | Mod                                 | Serious     | Low                              | -1.57 (-2.29, -0.86) | 0.46                 | Mod                                                      | No          | No              | Mod                  |

Table S7: GRADE assessment for 6-month SBP reduction in macronutrient composition NMA

| Comparison groups |                | Direct evidence |                 |             |                      |         |               |              |                  |                                   |             |                                |                                       |                        |
|-------------------|----------------|-----------------|-----------------|-------------|----------------------|---------|---------------|--------------|------------------|-----------------------------------|-------------|--------------------------------|---------------------------------------|------------------------|
| Arm 1             | Arm 2 (Ref)    | No. of study    | No. of patients | I-square, % | MD (95%CrI)          | RoB     | Inconsistency | Indirectness | Publication bias | Direct rating without imprecision | Imprecision | Direct rating with imprecision | Direct is more precise than indirect? | Need to rate indirect? |
| Dietary advice    | Usual diet     |                 |                 |             |                      |         |               |              |                  |                                   |             |                                |                                       |                        |
| Low fat           | Usual diet     | 2               | 211             | 1.4         | 6.16 (0.38, 11.9)    | Serious | No            | No           | Undetected       | Mod                               | Serious     | Low                            | No                                    | Yes                    |
| Low CHO           | Usual diet     | 1               | 80              | NA          | 4.37 (-5.60, 14.3)   | Serious | No            | No           | Undetected       | Mod                               | V serious   | V low                          | No                                    | Yes                    |
| Moderate Macro    | Usual diet     | 14              | 2458            | 77.7        | 3.43 (1.58, 5.29)    | No      | No            | Serious      | Undetected       | Mod                               | Serious     | Low                            | Yes                                   | Yes                    |
| Low fat           | Dietary advice |                 |                 |             |                      |         |               |              |                  |                                   |             |                                |                                       |                        |
| Low CHO           | Dietary advice |                 |                 |             |                      |         |               |              |                  |                                   |             |                                |                                       |                        |
| Moderate Macro    | Dietary advice | 6               | 2997            | 37.1        | 2.03 (-0.67, 4.75)   | No      | No            | Serious      | Undetected       | Mod                               | Serious     | Low                            | NA                                    | No                     |
| Low CHO           | Low fat        | 6               | 918             | 43.4        | 1.01 (-1.77, 3.81)   | No      | No            | No           | Undetected       | High                              | Serious     | Mod                            | Yes                                   | No                     |
| Moderate Macro    | Low fat        | 8               | 909             | 69.2        | -2.08 (-4.75, 0.65)  | No      | Serious       | Serious      | Undetected       | Low                               | Serious     | V low                          | Yes                                   | Yes                    |
| Moderate Macro    | Low CHO        | 33              | 3041            | 18.7        | -1.51 (-2.91, -0.14) | Serious | No            | No           | Undetected       | Mod                               | Serious     | Low                            | Yes                                   | Yes                    |

Table S7 continued: GRADE assessment for 6-month SBP reduction in macronutrient composition NMA

| Comparison groups |                | Indirect evidence   |                                           |                     |                |                                     |             |                                  | Network evidence     |                      |                                                          |             |                 |                      |
|-------------------|----------------|---------------------|-------------------------------------------|---------------------|----------------|-------------------------------------|-------------|----------------------------------|----------------------|----------------------|----------------------------------------------------------|-------------|-----------------|----------------------|
| Arm 1             | Arm 2 (Ref)    | MD (95%CrI)         | First order loop of the most contribution | Lowest of C1 and C2 | Intransitivity | Indirect rating without imprecision | Imprecision | Indirect rating with imprecision | MD (95%CrI)          | Incoherence, P-value | Higher rating of direct and indirect without imprecision | Incoherence | NMA Imprecision | Final network rating |
| Dietary advice    | Usual diet     | 1.45 (-1.8, 4.69)   | Moder Macro                               | Mod                 | No             | Mod                                 | Serious     | Low                              | 1.45 (-1.8, 4.69)    | NA                   | Mod                                                      | No          | Serious         | Low                  |
| Low fat           | Usual diet     | 4.19 (1.48, 6.94)   | Moder Macro, low carb                     | Low                 | No             | Low                                 | Serious     | V low                            | 5.06 (2.52, 7.60)    | 0.510                | Mod                                                      | No          | Serious         | Low                  |
| Low CHO           | Usual diet     | 5.27 (3.00, 7.59)   | Moder Macro                               | Mod                 | No             | Mod                                 | No          | Mod                              | 5.15 (3.01, 7.32)    | 0.824                | Mod                                                      | No          | No              | Mod                  |
| Moderate Macro    | Usual diet     | 3.47 (-4.24, 11.2)  | Low carb, low fat                         | Low                 | No             | Low                                 | Serious     | V low                            | 3.49 (1.72, 5.25)    | 0.970                | Mod                                                      | No          | Serious         | Low                  |
| Low fat           | Dietary advice | 3.59 (0.22, 6.99)   | Moder Macro                               | Low                 | No             | Low                                 | Serious     | V low                            | 3.59 (0.22, 6.99)    | NA                   | Low                                                      | No          | Serious         | V Low                |
| Low CHO           | Dietary advice | 3.69 (0.69, 6.74)   | Moder Macro                               | Mod                 | No             | Mod                                 | Serious     | Low                              | 3.69 (0.69, 6.74)    | NA                   | Mod                                                      | No          | Serious         | Low                  |
| Moderate Macro    | Dietary advice |                     |                                           |                     |                |                                     |             |                                  | 2.03 (-0.70, 4.78)   | NA                   | Mod                                                      | No          | Serious         | Low                  |
| Low CHO           | Low fat        | -1.52 (-4.58, 1.63) |                                           |                     |                |                                     |             |                                  | 0.09 (-1.94, 2.17)   | 0.216                | High                                                     | No          | Serious         | Mod                  |
| Moderate Macro    | Low fat        | -1.85 (-5.38, 1.66) | usual, low carb                           | Mod                 | No             | Mod                                 | Serious     | Low                              | -1.57 (-3.56, 0.44)  | 0.890                | Mod                                                      | No          | Serious         | Low                  |
| Moderate Macro    | Low CHO        | -2.58 (-6.86, 1.78) | usual, low fat                            | Low                 | No             | Low                                 | Serious     | V low                            | -1.67 (-2.99, -0.37) | 0.629                | Mod                                                      | No          | Serious         | Low                  |

Table S8: GRADE assessment for 6-month DBP reduction in macronutrient composition NMA

| Comparison groups |                | Direct evidence |                 |             |                      |         |               |              |                  |                                   |             |                                |                                       |                        |
|-------------------|----------------|-----------------|-----------------|-------------|----------------------|---------|---------------|--------------|------------------|-----------------------------------|-------------|--------------------------------|---------------------------------------|------------------------|
| Arm 1             | Arm 2 (Ref)    | No. of study    | No. of patients | I-square, % | MD (95%CrI)          | RoB     | Inconsistency | Indirectness | Publication bias | Direct rating without imprecision | Imprecision | Direct rating with imprecision | Direct is more precise than indirect? | Need to rate indirect? |
| Dietary advice    | Usual diet     |                 |                 |             |                      |         |               |              |                  |                                   |             |                                |                                       |                        |
| Low fat           | Usual diet     | 2               | 211             | 0.0         | 3.09 (-0.18, 6.39)   | Serious | No            | No           | Undetected       | Mod                               | Serious     | Low                            | No                                    | Yes                    |
| Low CHO           | Usual diet     | 1               | 80              | NA          | 3.30 (-3.35, 9.94)   | Serious | No            | No           | Undetected       | Mod                               | V serious   | V low                          | No                                    | Yes                    |
| Moderate Macro    | Usual diet     | 14              | 2458            | 74.2        | 1.89 (0.79, 2.98)    | No      | No            | Serious      | Undetected       | Mod                               | Serious     | Low                            | Yes                                   | Yes                    |
| Low fat           | Dietary advice |                 |                 |             |                      |         |               |              |                  |                                   |             |                                |                                       |                        |
| Low CHO           | Dietary advice |                 |                 |             |                      |         |               |              |                  |                                   |             |                                |                                       |                        |
| Moderate Macro    | Dietary advice | 6               | 2997            | 6.9         | 0.84 (-0.74, 2.41)   | No      | No            | Serious      | Undetected       | Mod                               | Serious     | Low                            | NA                                    | No                     |
| Low CHO           | Low fat        | 6               | 918             | 10.1        | 1.41 (-0.29, 3.13)   | No      | No            | No           | Undetected       | High                              | Serious     | Mod                            | Yes                                   | No                     |
| Moderate Macro    | Low fat        | 8               | 909             | 30.5        | -1.92 (-3.65, -0.18) | No      | Serious       | Serious      | Undetected       | Low                               | Serious     | V low                          | Yes                                   | Yes                    |
| Moderate Macro    | Low CHO        | 32              | 2985            | 15.4        | -1.09 (-1.94, -0.25) | Serious | No            | No           | Undetected       | Mod                               | Serious     | Low                            | Yes                                   | Yes                    |

Table S8 continued: GRADE assessment for 6-month DBP reduction in macronutrient composition NMA

| Comparison groups |                | Indirect evidence    |                                           |                      |                |                                     |             |                                  | Network evidence     |                      |                                                          |             |                 |                      |
|-------------------|----------------|----------------------|-------------------------------------------|----------------------|----------------|-------------------------------------|-------------|----------------------------------|----------------------|----------------------|----------------------------------------------------------|-------------|-----------------|----------------------|
| Arm 1             | Arm 2 (Ref)    | MD (95%CrI)          | First order loop of the most contribution | Low est of C1 and C2 | Intransitivity | Indirect rating without imprecision | Imprecision | Indirect rating with imprecision | MD (95%CrI)          | Incoherence, P-value | Higher rating of direct and indirect without imprecision | Incoherence | NMA Imprecision | Final network rating |
| Dietary advice    | Usual diet     | 1.05 (-0.92, 3.02)   | Moder Macro                               | Mod                  | No             | Mod                                 | Serious     | Low                              | 1.05 (-0.92, 3.02)   | NA                   | Mod                                                      | No          | Serious         | Low                  |
| Low fat           | Usual diet     | 2.55 (0.77, 4.36)    | Moder Macro, low carb                     | Low                  | No             | Low                                 | Serious     | V low                            | 2.85 (1.30, 4.41)    | 0.744                | Mod                                                      | No          | Serious         | Low                  |
| Low CHO           | Usual diet     | 3.20 (1.78, 4.62)    | Moder Macro                               | Mod                  | No             | Mod                                 | Serious     | Low                              | 3.22 (1.90, 4.54)    | 0.966                | Mod                                                      | No          | Serious         | Low                  |
| Moderate Macro    | Usual diet     | 1.61 (-2.83, 6.03)   | Low carb, low fat                         | Low                  | No             | Low                                 | Serious     | V low                            | 1.89 (0.82, 2.96)    | 0.916                | Mod                                                      | No          | Serious         | Low                  |
| Low fat           | Dietary advice | 1.8 (-0.28, 3.88)    | Moder Macro                               | Low                  | No             | Low                                 | Serious     | V low                            | 1.8 (-0.28, 3.88)    | NA                   | Low                                                      | No          | Serious         | V Low                |
| Low CHO           | Dietary advice | 2.16 (0.32, 4.01)    | Moder Macro                               | Mod                  | No             | Mod                                 | Serious     | Low                              | 2.16 (0.32, 4.01)    | NA                   | Mod                                                      | No          | Serious         | Low                  |
| Moderate Macro    | Dietary advice |                      |                                           |                      |                |                                     |             |                                  | 0.83 (-0.83, 2.48)   | NA                   | Mod                                                      | No          | Serious         | Low                  |
| Low CHO           | Low fat        | -1.31 (-3.22, 0.593) | Moder Macro, usual                        |                      |                |                                     |             |                                  | 0.37 (-0.93, 1.66)   | 0.029                | High                                                     | No          | Serious         | Mod                  |
| Moderate Macro    | Low fat        | -0.39 (-2.48, 1.66)  | usual, low carb                           | Mod                  | No             | Mod                                 | Serious     | Low                              | -0.96 (-2.23, 0.29)  | 0.426                | Mod                                                      | No          | Serious         | Low                  |
| Moderate Macro    | Low CHO        | -3.05 (-5.77, -0.30) | usual, low fat                            | Low                  | No             | Low                                 | Serious     | V low                            | -1.33 (-2.16, -0.51) | 0.178                | Mod                                                      | No          | Serious         | Low                  |

Table S9: GRADE assessment for 6-month LDL reduction in macronutrient composition NMA

| Comparison groups |                | Direct evidence |                 |              |                      |         |               |              |                  |                                   |             |                                |                                       |                        |
|-------------------|----------------|-----------------|-----------------|--------------|----------------------|---------|---------------|--------------|------------------|-----------------------------------|-------------|--------------------------------|---------------------------------------|------------------------|
| Arm 1             | Arm 2 (Ref)    | No. of study    | No. of patients | I-squares, % | MD (95% CrI)         | RoB     | Inconsistency | Indirectness | Publication bias | Direct rating without imprecision | Imprecision | Direct rating with imprecision | Direct is more precise than indirect? | Need to rate indirect? |
| Dietary advice    | Usual diet     |                 |                 |              |                      |         |               |              |                  |                                   |             |                                |                                       |                        |
| Low fat           | Usual diet     | 2               | 201             | 0.0          | 7.71 (-1.90, 17.2)   | Serious | No            | No           | Undetected       | Mod                               | V serious   | V low                          | No                                    | Yes                    |
| Low CHO           | Usual diet     | 1               | 70              | NA           | 2.71 (-24.7, 30.1)   | Serious | No            | No           | Undetected       | Mod                               | V serious   | V low                          | No                                    | Yes                    |
| Moderate Macro    | Usual diet     | 12              | 1572            | 26.9         | 5.21 (1.77, 8.80)    | No      | No            | No           | Undetected       | High                              | Serious     | Mod                            | NA                                    | No                     |
| Low fat           | Dietary advice |                 |                 |              |                      |         |               |              |                  |                                   |             |                                |                                       |                        |
| Low CHO           | Dietary advice |                 |                 |              |                      |         |               |              |                  |                                   |             |                                |                                       |                        |
| Moderate Macro    | Dietary advice | 4               | 1176            | 97.5         | 3.60 (-1.91, 9.34)   | No      | No            | Serious      | Undetected       | Mod                               | Serious     | Low                            | NA                                    | No                     |
| Low CHO           | Low fat        | 7               | 946             | 4.8          | -6.35 (-10.9, -1.74) | No      | No            | No           | Undetected       | High                              | Serious     | Mod                            | Yes                                   | No                     |
| Moderate Macro    | Low fat        | 9               | 1019            | 54.9         | -1.52 (-6.54, 3.55)  | No      | Serious       | Serious      | Undetected       | Low                               | Serious     | V low                          | Yes                                   | Yes                    |
| Moderate Macro    | Low CHO        | 38              | 3425            | 53.4         | 4.16 (1.90, 6.52)    | No      | No            | Serious      | Undetected       | Mod                               | Serious     | Low                            | Yes                                   | Yes                    |

Table S9 continued: GRADE assessment for 6-month LDL reduction in macronutrient composition NMA

| Comparison groups |                | Indirect evidence   |                                           |                     |                |                                     |             |                                  | Network evidence     |                      |                                                          |             |                 |                      |
|-------------------|----------------|---------------------|-------------------------------------------|---------------------|----------------|-------------------------------------|-------------|----------------------------------|----------------------|----------------------|----------------------------------------------------------|-------------|-----------------|----------------------|
| Arm 1             | Arm 2 (Ref)    | MD (95% CrI)        | First order loop of the most contribution | Lowest of C1 and C2 | Intransitivity | Indirect rating without imprecision | Imprecision | Indirect rating with imprecision | MD (95% CrI)         | Incoherence, P-value | Higher rating of direct and indirect without imprecision | Incoherence | NMA Imprecision | Final network rating |
| Dietary advice    | Usual diet     | 1.6 (-5.03, 8.2)    | Moder Macro                               | Mod                 | No             | Mod                                 | Serious     | Low                              | 1.60 (-5.03, 8.2)    | NA                   | Mod                                                      | No          | Serious         | Low                  |
| Low fat           | Usual diet     | 6.58 (1.53, 11.80)  | Moder Macro                               | High                | No             | High                                | Serious     | Mod                              | 7.07 (2.44, 11.70)   | 0.828                | High                                                     | No          | Serious         | Mod                  |
| Low CHO           | Usual diet     | 0.69 (-3.36, 4.73)  | Moder Macro                               | Mod                 | No             | Mod                                 | Serious     | Low                              | 1.00 (-2.95, 4.95)   | 0.807                | Mod                                                      | No          | Serious         | Low                  |
| Moderate Macro    | Usual diet     |                     |                                           |                     |                |                                     |             |                                  | 5.22 (1.9, 8.68)     | NA                   | High                                                     | No          | Serious         | Mod                  |
| Low fat           | Dietary advice | 5.47 (-1.19, 12.16) | Moder Macro                               | Low                 | No             | Low                                 | Serious     | V low                            | 5.47 (-1.19, 12.16)  | NA                   | Low                                                      | No          | Serious         | V Low                |
| Low CHO           | Dietary advice | -0.6 (-6.68, 5.56)  | Moder Macro                               | Mod                 | No             | Mod                                 | Serious     | Low                              | -0.6 (-6.68, 5.56)   | NA                   | Mod                                                      | No          | Serious         | Low                  |
| Moderate Macro    | Dietary advice |                     |                                           |                     |                |                                     |             |                                  | 3.61 (-1.97, 9.44)   | NA                   | Mod                                                      | No          | Serious         | Low                  |
| Low CHO           | Low fat        | -5.55 (-11.3, 0.29) |                                           |                     |                |                                     |             |                                  | -6.07 (-9.59, -2.53) | 0.820                | High                                                     | No          | Serious         | Mod                  |
| Moderate Macro    | Low fat        | -1.93 (-8.32, 4.74) | low carb                                  | Mod                 | No             | Mod                                 | Serious     | Low                              | -1.85 (-5.33, 1.73)  | 0.962                | Mod                                                      | No          | Serious         | Low                  |
| Moderate Macro    | Low CHO        | 4.87 (-2.78, 12.6)  | low fat                                   | Low                 | No             | Low                                 | Serious     | V low                            | 4.21 (2.04, 6.48)    | 0.867                | Mod                                                      | No          | Serious         | Low                  |

Table S10: GRADE assessment for 6-month HDL increase in macronutrient composition NMA

| Comparison groups |                | Direct evidence |                 |             |                      |         |               |              |                  |                                   |             |                                |                                       |                        |
|-------------------|----------------|-----------------|-----------------|-------------|----------------------|---------|---------------|--------------|------------------|-----------------------------------|-------------|--------------------------------|---------------------------------------|------------------------|
| Arm 1             | Arm 2 (Ref)    | No. of study    | No. of patients | I-square, % | MD (95%CrI)          | RoB     | Inconsistency | Indirectness | Publication bias | Direct rating without imprecision | Imprecision | Direct rating with imprecision | Direct is more precise than indirect? | Need to rate indirect? |
| Dietary advice    | Usual diet     |                 |                 |             |                      |         |               |              |                  |                                   |             |                                |                                       |                        |
| Low fat           | Usual diet     | 2               | 201             | 0.0         | -3.35 (-7.01, 0.32)  | Serious | No            | No           | Undetected       | Mod                               | V serious   | V low                          | No                                    | Yes                    |
| Low CHO           | Usual diet     | 1               | 70              | NA          | 2.69 (-6.13, 11.5)   | Serious | No            | No           | Undetected       | Mod                               | V serious   | V low                          | No                                    | Yes                    |
| Moderate Macro    | Usual diet     | 12              | 1572            | 55.1        | -0.74 (-2.22, 0.62)  | No      | No            | No           | Undetected       | High                              | Serious     | Mod                            | NA                                    | No                     |
| Low fat           | Dietary advice |                 |                 |             |                      |         |               |              |                  |                                   |             |                                |                                       |                        |
| Low CHO           | Dietary advice |                 |                 |             |                      |         |               |              |                  |                                   |             |                                |                                       |                        |
| Moderate Macro    | Dietary advice | 4               | 1176            | 99.3        | 1.08 (-1.23, 3.31)   | No      | No            | Serious      | Undetected       | Mod                               | Serious     | Low                            | NA                                    | No                     |
| Low CHO           | Low fat        | 7               | 946             | 57.1        | 3.37 (1.20, 5.50)    | No      | No            | No           | Undetected       | High                              | Serious     | Mod                            | Yes                                   | Yes                    |
| Moderate Macro    | Low fat        | 9               | 1019            | 0.0         | 1.36 (-0.42, 3.16)   | No      | No            | Serious      | Undetected       | Mod                               | Serious     | Low                            | Yes                                   | Yes                    |
| Moderate Macro    | Low CHO        | 38              | 3425            | 61.7        | -3.34 (-4.25, -2.45) | No      | No            | Serious      | Undetected       | Mod                               | No          | Mod                            | Yes                                   | Yes                    |



Table S10 continued: GRADE assessment for 6-month HDL increase in macronutrient composition NMA

| Comparison groups |                | Indirect evidence   |                                           |                      |                |                                     |             |                                  | Network evidence     |                      |                                                          |             |                 |                      |
|-------------------|----------------|---------------------|-------------------------------------------|----------------------|----------------|-------------------------------------|-------------|----------------------------------|----------------------|----------------------|----------------------------------------------------------|-------------|-----------------|----------------------|
| Arm 1             | Arm 2 (Ref)    | MD (95%CrI)         | First order loop of the most contribution | Low est of C1 and C2 | Intransitivity | Indirect rating without imprecision | Imprecision | Indirect rating with imprecision | MD (95%CrI)          | Incoherence, P-value | Higher rating of direct and indirect without imprecision | Incoherence | NMA Imprecision | Final network rating |
| Dietary advice    | Usual diet     | -1.97 (-4.68, 0.70) | Moder Macro                               | Mod                  | No             | Mod                                 | Serious     | Low                              | -1.97 (-4.68, 0.7)   | NA                   | Mod                                                      | No          | Serious         | Low                  |
| Low fat           | Usual diet     | -1.25 (-3.52, 0.94) | Moder Macro                               | High                 | No             | High                                | Serious     | Mod                              | -1.88 (-3.73, -0.04) | 0.322                | High                                                     | No          | Serious         | Mod                  |
| Low CHO           | Usual diet     | 2.30 (0.55, 3.98)   | Moder Macro                               | Mod                  | No             | Mod                                 | Serious     | Low                              | 2.31 (0.68, 3.87)    | 0.895                | Mod                                                      | No          | Serious         | Low                  |
| Moderate Macro    | Usual diet     |                     |                                           |                      |                |                                     |             |                                  | -0.89 (-2.31, 0.44)  | NA                   | High                                                     | No          | Serious         | Mod                  |
| Low fat           | Dietary advice | 0.10 (-2.61, 2.8)   | Moder Macro                               | Mod                  | No             | Mod                                 | Serious     | Low                              | 0.1 (-2.61, 2.8)     | NA                   | Mod                                                      | No          | Serious         | Low                  |
| Low CHO           | Dietary advice | 4.29 (1.77, 6.74)   | Moder Macro                               | Mod                  | No             | Mod                                 | Serious     | Low                              | 4.29 (1.77, 6.74)    | NA                   | Mod                                                      | No          | Serious         | Low                  |
| Moderate Macro    | Dietary advice |                     |                                           |                      |                |                                     |             |                                  | 1.09 (-1.28, 3.37)   | NA                   | Mod                                                      | No          | Serious         | Low                  |
| Low CHO           | Low fat        | 4.75 (2.62, 6.84)   | Moder Macro                               | Mod                  | No             | Mod                                 | No          | Mod                              | 4.19 (2.69, 5.64)    | 0.398                | High                                                     | No          | No              | High                 |
| Moderate Macro    | Low fat        | -1.43 (-4.40, 1.42) | low carb                                  | Mod                  | No             | Mod                                 | Serious     | Low                              | 0.98 (-0.45, 2.36)   | 0.078                | Mod                                                      | No          | Serious         | Low                  |
| Moderate Macro    | Low CHO        | -0.66 (-3.92, 2.64) | low fat                                   | Mod                  | No             | Mod                                 | Serious     | Low                              | -3.20 (-4.10, -2.33) | 0.117                | Mod                                                      | No          | No              | Mod                  |

Table S11: GRADE assessment for 6-month CRP reduction in macronutrient composition NMA

| Comparison groups |                | Direct evidence |                 |             |                     |         |               |              |                  |                                   |             |                                |                                       |                        |
|-------------------|----------------|-----------------|-----------------|-------------|---------------------|---------|---------------|--------------|------------------|-----------------------------------|-------------|--------------------------------|---------------------------------------|------------------------|
| Arm 1             | Arm 2 (Ref)    | No. of study    | No. of patients | I-square, % | MD (95%CrI)         | RoB     | Inconsistency | Indirectness | Publication bias | Direct rating without imprecision | Imprecision | Direct rating with imprecision | Direct is more precise than indirect? | Need to rate indirect? |
| Dietary advice    | Usual diet     |                 |                 |             |                     |         |               |              |                  |                                   |             |                                |                                       |                        |
| Low fat           | Usual diet     |                 |                 |             |                     |         |               |              |                  |                                   |             |                                |                                       |                        |
| Low CHO           | Usual diet     |                 |                 |             |                     |         |               |              |                  |                                   |             |                                |                                       |                        |
| Moderate Macro    | Usual diet     | 6               | 485             | 91.9        | 0.09 (-0.82, 1.03)  | No      | Serious       | No           | Undetected       | Mod                               | Serious     | Low                            | NA                                    | No                     |
| Low fat           | Dietary advice |                 |                 |             |                     |         |               |              |                  |                                   |             |                                |                                       |                        |
| Low CHO           | Dietary advice |                 |                 |             |                     |         |               |              |                  |                                   |             |                                |                                       |                        |
| Moderate Macro    | Dietary advice | 1               | 40              | NA          | 2.80 (-0.548, 6.14) | No      | No            | Serious      | Undetected       | Mod                               | V serious   | V low                          | NA                                    | No                     |
| Low CHO           | Low fat        | 2               | 171             | 0.0         | -0.25 (-2.00, 1.47) | Serious | No            | No           | Undetected       | Mod                               | Serious     | Low                            | No                                    | Yes                    |
| Moderate Macro    | Low fat        | 2               | 278             | 0.0         | -0.12 (-2.07, 1.80) | No      | No            | Serious      | Undetected       | Mod                               | Serious     | Low                            | No                                    | Yes                    |
| Moderate Macro    | Low CHO        | 16              | 1592            | 68.7        | -0.22 (-0.86, 0.41) | No      | Serious       | No           | Undetected       | Mod                               | Serious     | Low                            | Yes                                   | Yes                    |

Table S11 continued: GRADE assessment for 6-month CRP reduction in macronutrient composition NMA

| Comparison groups |                | Indirect evidence   |                                           |                      |                |                                     |             |                                  | Network evidence    |                      |                                                          |             |                 |                      |
|-------------------|----------------|---------------------|-------------------------------------------|----------------------|----------------|-------------------------------------|-------------|----------------------------------|---------------------|----------------------|----------------------------------------------------------|-------------|-----------------|----------------------|
| Arm 1             | Arm 2 (Ref)    | MD (95%CrI)         | First order loop of the most contribution | Low est of C1 and C2 | Intransitivity | Indirect rating without imprecision | Imprecision | Indirect rating with imprecision | MD (95%CrI)         | Incoherence, P-value | Higher rating of direct and indirect without imprecision | Incoherence | NMA Imprecision | Final network rating |
| Dietary advice    | Usual diet     | -2.7 (-6.73, 1.33)  | Moder Macro                               | Mod                  | No             | Mod                                 | Serious     | Low                              | -2.7 (-6.73, 1.33)  | NA                   | Mod                                                      | No          | Serious         | Mod                  |
| Low fat           | Usual diet     | 0.38 (-1.22, 2.04)  | Moder Macro                               | Mod                  | No             | Mod                                 | Serious     | Low                              | 0.38 (-1.22, 2.04)  | NA                   | Mod                                                      | No          | Serious         | Mod                  |
| Low CHO           | Usual diet     | 0.29 (-0.8, 1.42)   | Moder Macro                               | Mod                  | No             | Mod                                 | Serious     | Low                              | 0.29 (-0.8, 1.42)   | NA                   | Mod                                                      | No          | Serious         | Mod                  |
| Moderate Macro    | Usual diet     |                     |                                           |                      |                |                                     |             |                                  | 0.09 (-0.81, 1.02)  | NA                   | Mod                                                      | No          | Serious         | Mod                  |
| Low fat           | Dietary advice | 3.08 (-1.06, 7.23)  | Moder Macro                               | Mod                  | No             | Mod                                 | Serious     | Low                              | 3.08 (-1.06, 7.23)  | NA                   | Mod                                                      | No          | Serious         | Mod                  |
| Low CHO           | Dietary advice | 2.99 (-0.98, 6.96)  | Moder Macro                               | Mod                  | No             | Mod                                 | Serious     | Low                              | 2.99 (-0.98, 6.96)  | NA                   | Mod                                                      | No          | Serious         | Mod                  |
| Moderate Macro    | Dietary advice |                     |                                           |                      |                |                                     |             |                                  | 2.80 (-0.548, 6.14) | NA                   | Mod                                                      | No          | Serious         | Mod                  |
| Low CHO           | Low fat        | 0.34 (-2.26, 2.94)  | Moder Macro                               | Mod                  | No             | Mod                                 | Serious     | Low                              | -0.09 (-1.43, 1.25) | 0.683                | Mod                                                      | No          | Serious         | Mod                  |
| Moderate Macro    | Low fat        | -0.39 (-2.85, 2.05) | Low carb                                  | Mod                  | No             | Mod                                 | Serious     | Low                              | -0.29 (-1.65, 1.05) | 0.902                | Mod                                                      | No          | Serious         | Mod                  |
| Moderate Macro    | Low CHO        | 0.28 (-3.10, 3.67)  | Low fat                                   | Mod                  | No             | Mod                                 | Serious     | Low                              | -0.20 (-0.82, 0.41) | 0.759                | Mod                                                      | No          | Serious         | Mod                  |

Table S12: Macronutrient composition NMA results for 6- and 12- months CRP reductions

|                           | 12-mo CRP reduction (n=8) |                       |                     |                     |                               |
|---------------------------|---------------------------|-----------------------|---------------------|---------------------|-------------------------------|
| 6-mo CRP reduction (n=25) | <b>Usual Diet</b>         |                       |                     |                     |                               |
|                           | -2.7 (-6.73, 1.33)        | <b>Dietary Advice</b> | 0.86 (-1.18, 3.00)  | 0.01 (-1.21, 1.38)  | 0.15 (-0.90, 1.33)            |
|                           | 0.38 (-1.22, 2.04)        | 3.08 (-1.06, 7.23)    | <b>Low Fat</b>      | -0.85 (-2.62, 0.93) | -0.70 (-2.51, 1.08)           |
|                           | 0.29 (-0.80, 1.42)        | 2.99 (-0.98, 6.96)    | -0.09 (-1.43, 1.24) | <b>Low CHO</b>      | 0.15 (-0.57, 0.83)            |
|                           | 0.09 (-0.81, 1.02)        | 2.79 (-1.14, 6.71)    | -0.29 (-1.65, 1.05) | -0.20 (-0.82, 0.41) | <b>Moderate Macronutrient</b> |

High certainty
Moderate certainty
Low certainty
Very low certainty

Table S13: Macronutrient composition NMA results for 12-month weight loss

|                          |                          |                             |                             |                               |
|--------------------------|--------------------------|-----------------------------|-----------------------------|-------------------------------|
| <b>Usual Diet</b>        |                          |                             |                             |                               |
| -2.13 (-4.35, -0.13)     | <b>Dietary Advice</b>    |                             |                             |                               |
| <b>3.34 (1.71, 4.99)</b> | <b>5.47 (3.67, 7.50)</b> | <b>Low Fat</b>              |                             |                               |
| <b>3.17 (1.55, 4.72)</b> | <b>5.31 (3.64, 7.11)</b> | -0.16 (-1.42, 1.00)         | <b>Low CHO</b>              |                               |
| <b>1.90 (0.45, 3.30)</b> | <b>4.03 (2.57, 5.66)</b> | <b>-1.44 (-2.58, -0.37)</b> | <b>-1.27 (-2.06, -0.46)</b> | <b>Moderate Macronutrient</b> |

Table S14: Macronutrient composition NMA results for 12-month SBP and DBP reductions

|                            |                            |                       |                    |                     |                               |
|----------------------------|----------------------------|-----------------------|--------------------|---------------------|-------------------------------|
| 12-mo SBP reduction (n=62) | 12-mo DBP reduction (n=61) |                       |                    |                     |                               |
|                            | <b>Usual Diet</b>          | -1.06 (-3.97, 2.34)   | 0.23 (-2.17, 2.99) | 0.77 (-1.60, 3.41)  | 0.14 (-1.99, 2.64)            |
|                            | -0.53 (-4.18, 3.50)        | <b>Dietary Advice</b> | 1.28 (-1.44, 4.00) | 1.83 (-0.75, 4.21)  | 1.19 (-0.98, 3.37)            |
|                            | -0.29 (-3.43, 3.17)        | 0.23 (-3.15, 3.61)    | <b>Low Fat</b>     | 0.54 (-1.34, 2.27)  | -0.08 (-1.74, 1.57)           |
|                            | 1.33 (-1.61, 4.56)         | 1.86 (-1.20, 4.87)    | 1.64 (-0.72, 3.92) | <b>Low CHO</b>      | -0.63 (-1.77, 0.66)           |
|                            | 0.51 (-2.15, 3.49)         | 1.04 (-1.57, 3.62)    | 0.81 (-1.37, 2.96) | -0.83 (-2.37, 0.77) | <b>Moderate Macronutrient</b> |

Table S15: Macronutrient composition NMA results for 12-month LDL reduction and HDL increase

|                            |                           |                             |                             |                          |                               |
|----------------------------|---------------------------|-----------------------------|-----------------------------|--------------------------|-------------------------------|
| 12-mo LDL reduction (n=62) | 12-mo HDL increase (n=61) |                             |                             |                          |                               |
|                            | <b>Usual Diet</b>         | <b>-4.32 (-7.88, -0.75)</b> | <b>-2.90 (-5.61, -0.15)</b> | 0.07 (-2.47, 2.65)       | <b>-2.81 (-5.09, -0.52)</b>   |
|                            | -0.7 (-6.82, 5.70)        | <b>Dietary Advice</b>       | 1.41 (-1.90, 4.76)          | <b>4.38 (1.37, 7.45)</b> | 1.50 (-1.23, 4.25)            |
|                            | 3.81 (-1.63, 9.87)        | 4.47 (-0.72, 10.24)         | <b>Low Fat</b>              | <b>2.97 (0.93, 5.04)</b> | 0.09 (-1.81, 1.98)            |
|                            | 1.19 (-4.01, 6.93)        | 1.85 (-2.55, 6.80)          | -2.62 (-6.69, 1.31)         | <b>Low CHO</b>           | <b>-2.88 (-4.21, -1.59)</b>   |
|                            | 1.45 (-3.29, 6.78)        | 2.10 (-1.43, 6.43)          | -2.37 (-6.2, 1.51)          | 0.28 (-2.32, 2.91)       | <b>Moderate Macronutrient</b> |

Table S16: 6-month weight loss across all macronutrient composition diet classes when restricted to overweight/obese yet otherwise healthy populations (below left) and restricted to low risk of bias studies (above right)

|                     |                          | Low risk of bias studies |                          |                             |                               |
|---------------------|--------------------------|--------------------------|--------------------------|-----------------------------|-------------------------------|
| Healthy populations | <b>Usual Diet</b>        | -0.93 (-2.68, 0.83)      | <b>3.48 (2.16, 4.83)</b> | <b>4.00 (2.73, 5.29)</b>    | <b>2.58 (1.57, 3.60)</b>      |
|                     | -0.67 (-3.10, 1.81)      | <b>Dietary Advice</b>    | <b>4.42 (2.61, 6.23)</b> | <b>4.93 (3.26, 6.62)</b>    | <b>3.51 (2.04, 4.98)</b>      |
|                     | <b>4.28 (2.11, 6.52)</b> | <b>4.95 (2.29, 7.63)</b> | <b>Low Fat</b>           | 0.51 (-0.68, 1.71)          | -0.90 (-1.97, 0.15)           |
|                     | <b>4.71 (2.86, 6.67)</b> | <b>5.38 (3.10, 7.72)</b> | 0.44 (-1.34, 2.24)       | <b>Low CHO</b>              | <b>-1.42 (-2.24, -0.61)</b>   |
|                     | <b>2.62 (1.09, 4.23)</b> | <b>3.29 (1.32, 5.30)</b> | -1.66 (-3.46, 0.15)      | <b>-2.09 (-3.27, -0.93)</b> | <b>Moderate Macronutrient</b> |



Table S17: 6-month weight loss across all macronutrient composition diet classes when restricted to studies without diet company support

|                          |                          |                             |                            |                               |
|--------------------------|--------------------------|-----------------------------|----------------------------|-------------------------------|
| <b>Usual Diet</b>        |                          |                             |                            |                               |
| 0.93 (-1.31, 3.16)       | <b>Dietary Advice</b>    |                             |                            |                               |
| <b>4.01 (2.61, 5.46)</b> | <b>3.09 (0.79, 5.41)</b> | <b>Low Fat</b>              |                            |                               |
| <b>4.47 (3.11, 5.89)</b> | <b>3.55 (1.36, 5.76)</b> | 0.46 (-0.81, 1.73)          | <b>Low CHO</b>             |                               |
| <b>2.77 (1.69, 3.90)</b> | 1.85 (-0.14, 3.86)       | <b>-1.24 (-2.40, -0.09)</b> | <b>-1.7 (-2.62, -0.80)</b> | <b>Moderate Macronutrient</b> |

Table S18: 6-month SBP reduction across all macronutrient composition diet classes when restricted to overweight/obese yet otherwise healthy populations (below left) and restricted to low risk of bias studies (above right)

|                     |                          | Low risk of bias studies |                          |                             |                               |
|---------------------|--------------------------|--------------------------|--------------------------|-----------------------------|-------------------------------|
| Healthy populations | <b>Usual Diet</b>        | 0.93 (-3.16, 4.99)       | <b>4.16 (1.17, 7.17)</b> | <b>5.26 (2.58, 7.96)</b>    | <b>3.66 (1.64, 5.72)</b>      |
|                     | 1.51 (-3.10, 6.11)       | <b>Dietary Advice</b>    | 3.22 (-1.00, 7.49)       | <b>4.33 (0.37, 8.31)</b>    | 2.73 (-0.77, 6.30)            |
|                     | <b>5.91 (2.37, 9.68)</b> | 4.37 (-0.15, 9.28)       | <b>Low Fat</b>           | 1.11 (-1.35, 3.55)          | -0.49 (-2.83, 1.87)           |
|                     | <b>5.71 (2.73, 8.86)</b> | <b>4.18 (0.16, 8.54)</b> | -0.19 (-2.79, 2.35)      | <b>Low CHO</b>              | -1.60 (-3.40, 0.22)           |
|                     | <b>3.27 (0.64, 5.91)</b> | 1.75 (-2.00, 5.58)       | -2.63 (-5.56, 0.06)      | <b>-2.44 (-4.32, -0.74)</b> | <b>Moderate Macronutrient</b> |

Table S19: 6-month SBP across all macronutrient composition diet classes when restricted to studies without diet company support

|                          |                       |                     |                             |                               |
|--------------------------|-----------------------|---------------------|-----------------------------|-------------------------------|
| <b>Usual Diet</b>        |                       |                     |                             |                               |
| 2.13 (-2.10, 6.41)       | <b>Dietary Advice</b> |                     |                             |                               |
| <b>4.81 (1.72, 7.90)</b> | 2.68 (-1.74, 7.03)    | <b>Low Fat</b>      |                             |                               |
| <b>5.59 (2.86, 8.37)</b> | 3.45 (-0.58, 7.52)    | 0.78 (-1.67, 3.29)  | <b>Low CHO</b>              |                               |
| <b>3.61 (1.41, 5.84)</b> | 1.49 (-2.15, 5.09)    | -1.20 (-3.64, 1.28) | <b>-1.98 (-3.80, -0.19)</b> | <b>Moderate Macronutrient</b> |

Table S20: 6-month DBP reduction across all macronutrient composition diet classes when restricted to overweight/obese yet otherwise healthy populations (below left) and restricted to low risk of bias studies (above right)

|                     |                          | Low risk of bias studies |                          |                             |                               |
|---------------------|--------------------------|--------------------------|--------------------------|-----------------------------|-------------------------------|
| Healthy populations | <b>Usual Diet</b>        | 0.56 (-2.05, 3.07)       | <b>2.62 (0.74, 4.52)</b> | <b>3.40 (1.71, 5.10)</b>    | <b>1.82 (0.54, 3.10)</b>      |
|                     | 1.10 (-1.14, 3.15)       | <b>Dietary Advice</b>    | 2.06 (-0.57, 4.80)       | <b>2.85 (0.39, 5.40)</b>    | 1.27 (-0.91, 3.53)            |
|                     | <b>2.63 (0.72, 4.65)</b> | 1.52 (-0.48, 3.92)       | <b>Low Fat</b>           | 0.78 (-0.80, 2.36)          | -0.80 (-2.32, 0.70)           |
|                     | <b>3.27 (1.67, 4.93)</b> | <b>2.16 (0.44, 4.19)</b> | 0.64 (-0.73, 1.93)       | <b>Low CHO</b>              | <b>-1.58 (-2.73, -0.44)</b>   |
|                     | <b>1.86 (0.43, 3.25)</b> | 0.75 (-0.80, 2.46)       | -0.77 (-2.35, 0.63)      | <b>-1.41 (-2.41, -0.52)</b> | <b>Moderate Macronutrient</b> |

Table S21: 6-month DBP reduction across all macronutrient composition diet classes when restricted to studies without diet company support

|                          |                       |                     |                             |                               |
|--------------------------|-----------------------|---------------------|-----------------------------|-------------------------------|
| <b>Usual Diet</b>        |                       |                     |                             |                               |
| 1.59 (-0.96, 4.23)       | <b>Dietary Advice</b> |                     |                             |                               |
| <b>2.57 (0.69, 4.47)</b> | 0.98 (-1.76, 3.65)    | <b>Low Fat</b>      |                             |                               |
| <b>3.48 (1.81, 5.17)</b> | 1.89 (-0.63, 4.35)    | 0.91 (-0.63, 2.46)  | <b>Low CHO</b>              |                               |
| <b>1.96 (0.61, 3.31)</b> | 0.37 (-1.90, 2.54)    | -0.61 (-2.17, 0.92) | <b>-1.52 (-2.66, -0.40)</b> | <b>Moderate Macronutrient</b> |

Table S22: 6-month LDL reduction across all macronutrient composition diet classes when restricted to overweight/obese yet otherwise healthy populations (below left) and restricted to low risk of bias studies (above right)

|                     |                           | Low risk of bias studies |                              |                             |                               |
|---------------------|---------------------------|--------------------------|------------------------------|-----------------------------|-------------------------------|
| Healthy populations | <b>Usual Diet</b>         | -0.44 (-7.26, 6.85)      | <b>5.88 (1.38, 10.61)</b>    | 2.17 (-1.45, 6.40)          | <b>4.67 (1.65, 7.96)</b>      |
|                     | 3.98 (-9.33, 17.41)       | <b>Dietary Advice</b>    | 6.24 (-0.90, 13.53)          | 2.44 (-3.94, 9.62)          | 5.04 (-1.23, 11.48)           |
|                     | <b>7.89 (0.23, 15.42)</b> | 3.93 (-9.61, 17.16)      | <b>Low Fat</b>               | <b>-3.67 (-7.06, -0.06)</b> | -1.19 (-4.71, 2.32)           |
|                     | 1.00 (-5.44, 7.59)        | -2.98 (-15.60, 9.70)     | <b>-6.88 (-12.02, -1.50)</b> | <b>Low CHO</b>              | 2.52 (-0.01, 4.65)            |
|                     | 4.11 (-1.53, 9.88)        | 0.14 (-11.94, 12.21)     | -3.78 (-9.50, 2.18)          | 3.10 (-0.64, 6.84)          | <b>Moderate Macronutrient</b> |

Table S23: 6-month LDL reduction across all macronutrient composition diet classes when restricted to studies without diet company support

|                           |                       |                       |                          |                               |
|---------------------------|-----------------------|-----------------------|--------------------------|-------------------------------|
| <b>Usual Diet</b>         |                       |                       |                          |                               |
| 0.93 (-7.47, 9.27)        | <b>Dietary Advice</b> |                       |                          |                               |
| <b>6.73 (0.90, 12.57)</b> | 5.80 (-2.50, 14.21)   | <b>Low Fat</b>        |                          |                               |
| 0.96 (-4.26, 6.37)        | 0.01 (-7.63, 7.96)    | -5.77 (-10.06, -1.36) | <b>Low CHO</b>           |                               |
| <b>4.75 (0.39, 9.32)</b>  | 3.81 (-3.11, 11.10)   | -1.97 (-6.33, 2.51)   | <b>3.79 (0.59, 7.02)</b> | <b>Moderate Macronutrient</b> |

Table S24: 6-month HDL increase across all macronutrient composition diet classes when restricted to overweight/obese yet otherwise healthy populations (below left) and restricted to low risk of bias studies (above right)

|                     |                     | Low risk of bias studies |                          |                             |                               |
|---------------------|---------------------|--------------------------|--------------------------|-----------------------------|-------------------------------|
| Healthy populations | <b>Usual Diet</b>   | -2.45 (-6.53, 1.84)      | -1.60 (-3.92, 0.58)      | <b>2.14 (0.06, 4.04)</b>    | -0.66 (-2.41, 0.89)           |
|                     | -0.73 (-5.21, 3.51) | <b>Dietary Advice</b>    | 0.89 (-3.54, 4.84)       | <b>4.62 (0.33, 8.39)</b>    | 1.84 (-2.32, 5.42)            |
|                     | -1.57 (-4.08, 1.22) | -0.86 (-5.00, 3.92)      | <b>Low Fat</b>           | <b>3.73 (2.02, 5.43)</b>    | 0.93 (-0.71, 2.55)            |
|                     | 2.13 (-0.15, 4.29)  | 2.87 (-1.21, 7.04)       | <b>3.69 (1.48, 5.57)</b> | <b>Low CHO</b>              | <b>-2.80 (-3.96, -1.65)</b>   |
|                     | -0.85 (-2.85, 0.97) | -0.11 (-4.02, 3.81)      | 0.72 (-1.67, 2.67)       | <b>-2.98 (-4.33, -1.69)</b> | <b>Moderate Macronutrient</b> |



Table S25: 6-month HDL increase across all macronutrient composition diet classes when restricted to studies without diet company support

|                             |                          |                          |                             |                               |
|-----------------------------|--------------------------|--------------------------|-----------------------------|-------------------------------|
| <b>Usual Diet</b>           |                          |                          |                             |                               |
| -2.60 (-5.28, 0.10)         | <b>Dietary Advice</b>    |                          |                             |                               |
| <b>-2.76 (-4.75, -0.76)</b> | -0.17 (-2.86, 2.53)      | <b>Low Fat</b>           |                             |                               |
| 1.21 (-0.66, 2.99)          | <b>3.82 (1.26, 6.23)</b> | <b>3.97 (2.34, 5.53)</b> | <b>Low CHO</b>              |                               |
| <b>-1.50 (-3.06, -0.01)</b> | 1.10 (-1.19, 3.26)       | 1.26 (-0.32, 2.76)       | <b>-2.71 (-3.81, -1.61)</b> | <b>Moderate Macronutrient</b> |

Table S26: 6-month weight loss across all macronutrient composition diet classes after adjusting for behavior support and exercise

|                          |                          |                             |                             |                        |
|--------------------------|--------------------------|-----------------------------|-----------------------------|------------------------|
| Usual Diet               |                          |                             |                             |                        |
| -0.21 (-1.81, 1.42)      | Dietary Advice           |                             |                             |                        |
| <b>2.69 (1.16, 4.27)</b> | <b>2.90 (1.05, 4.78)</b> | Low Fat                     |                             |                        |
| <b>3.14 (1.74, 4.59)</b> | <b>3.36 (1.66, 5.07)</b> | 0.45 (-0.64, 1.56)          | Low CHO                     |                        |
| <b>1.57 (0.28, 2.90)</b> | <b>1.78 (0.20, 3.39)</b> | <b>-1.11 (-2.15, -0.09)</b> | <b>-1.57 (-2.24, -0.91)</b> | Moderate Macronutrient |

Table S27: 6-month SBP and DBP reductions across all macronutrient composition diet classes after adjusting for behavior support and exercise

| 6-mo SBP reduction | 6-mo DBP reduction       |                       |                          |                             |                               |
|--------------------|--------------------------|-----------------------|--------------------------|-----------------------------|-------------------------------|
|                    | <b>Usual Diet</b>        | 1.81 (-0.68, 4.29)    | <b>2.79 (1.20, 4.41)</b> | <b>3.28 (1.92, 4.64)</b>    | <b>1.88 (0.76, 3.00)</b>      |
|                    | 2.10 (-0.95, 5.07)       | <b>Dietary Advice</b> | 0.98 (-1.64, 3.67)       | 1.47 (-0.86, 3.83)          | 0.07 (-2.19, 2.36)            |
|                    | <b>4.13 (1.68, 6.58)</b> | 2.03 (-1.27, 5.39)    | <b>Low Fat</b>           | 0.49 (-0.86, 1.82)          | -0.92 (-2.12, 0.36)           |
|                    | <b>4.37 (2.29, 6.47)</b> | 2.62 (-0.68, 5.30)    | 0.24 (-1.67, 2.15)       | <b>Low CHO</b>              | <b>-1.40 (-2.25, -0.55)</b>   |
|                    | <b>2.49 (0.73, 4.23)</b> | 0.38 (-2.35, 3.18)    | -1.64 (-3.50, 0.21)      | <b>-1.88 (-3.15, -0.64)</b> | <b>Moderate Macronutrient</b> |

Table S28: 6-month LDL reduction and HDL increase across all macronutrient composition diet classes after adjusting for behavior support and exercise

|                           |                       | 6-mo HDL reduction |                             |                          |                               |
|---------------------------|-----------------------|--------------------|-----------------------------|--------------------------|-------------------------------|
|                           |                       | 6-mo LDL reduction | <b>Usual Diet</b>           | -2.26 (-5.09, 0.62)      | <b>-1.95 (-3.87, -0.04)</b>   |
| 1.70 (-4.23, 7.83)        | <b>Dietary Advice</b> |                    | 0.32 (-2.67, 3.22)          | <b>4.53 (1.81, 7.08)</b> | 1.39 (-1.22, 3.81)            |
| <b>6.62 (2.24, 11.08)</b> | 4.93 (-1.36, 11.05)   |                    | <b>Low Fat</b>              | <b>4.21 (2.65, 5.73)</b> | 1.07 (-0.46, 2.52)            |
| 1.13 (-2.63, 4.88)        | -0.58 (-6.26, 4.95)   |                    | <b>-5.51 (-8.90, -2.11)</b> | <b>Low CHO</b>           | <b>-3.15 (-4.05, -2.26)</b>   |
| <b>5.07 (1.91, 8.30)</b>  | 3.36 (-1.84, 8.53)    |                    | -1.56 (-4.89, 1.83)         | <b>3.95 (1.85, 6.09)</b> | <b>Moderate Macronutrient</b> |
|                           |                       |                    |                             |                          |                               |

Table S29: GRADE assessment for 6-month weight loss in individual popular diets NMA

| Comparisons       |                | Direct evidence |                 |             |                      |         |               |              |                  |                                   |             |                                |                                       |                        |
|-------------------|----------------|-----------------|-----------------|-------------|----------------------|---------|---------------|--------------|------------------|-----------------------------------|-------------|--------------------------------|---------------------------------------|------------------------|
| Arm 1             | Arm 2 (Ref)    | No. of study    | No. of patients | I-square, % | MD (95%CrI)          | RoB     | Inconsistency | Indirectness | Publication bias | Direct rating without imprecision | Imprecision | Direct rating with imprecision | Direct is more precise than indirect? | Need to rate indirect? |
| Dietary advice    | Usual diet     | 4               | 482             | 0.0         | -0.231 (-2.31, 1.86) | No      | No            | No           | Undetected       | High                              | Serious     | Mod                            | No                                    | Yes                    |
| Low fat           | Usual diet     | 6               | 916             | 86.0        | 4.87 (3.42, 6.36)    | No      | Serious       | No           | Undetected       | Mod                               | No          | Mod                            | Yes                                   | Yes                    |
| Atkins            | Usual diet     | 1               | 80              | NA          | 9.78 (1.07, 18.5)    | Serious | No            | No           | Undetected       | Mod                               | Serious     | Low                            | No                                    | Yes                    |
| DASH              | Usual diet     | 8               | 1119            | 88.0        | 3.15 (1.93, 4.37)    | No      | Serious       | Serious      | Undetected       | Low                               | No          | Low                            | Yes                                   | Yes                    |
| Jenny Craig       | Usual diet     | 1               | 47              | NA          | 5.42 (-6.32, 17.2)   | No      | No            | No           | Undetected       | High                              | V serious   | Low                            | No                                    | Yes                    |
| Mediterranean     | Usual diet     | 8               | 725             | 91.2        | 2.11 (0.791, 3.49)   | No      | Serious       | No           | Undetected       | Mod                               | No          | Mod                            | Yes                                   | Yes                    |
| Ornish            | Usual diet     |                 |                 |             |                      |         |               |              |                  |                                   |             |                                |                                       |                        |
| Paleolithic       | Usual diet     |                 |                 |             |                      |         |               |              |                  |                                   |             |                                |                                       |                        |
| Portfolio         | Usual diet     |                 |                 |             |                      |         |               |              |                  |                                   |             |                                |                                       |                        |
| Rosemary Conley   | Usual diet     | 2               | 233             | 53.1        | 4.05 (-0.430, 8.54)  | No      | Serious       | No           | Undetected       | Mod                               | Serious     | Low                            | NA                                    | No                     |
| Slimming World    | Usual diet     | 1               | 157             | NA          | 1.29 (-2.42, 5.01)   | No      | No            | No           | Undetected       | High                              | Serious     | Mod                            | NA                                    | No                     |
| South Beach       | Usual diet     |                 |                 |             |                      |         |               |              |                  |                                   |             |                                |                                       |                        |
| The Biggest Loser | Usual diet     | 1               | 260             | NA          | 2.88 (2.25, 3.50)    | No      | No            | No           | Undetected       | High                              | Serious     | Mod                            | NA                                    | No                     |
| Volumetrics       | Usual diet     |                 |                 |             |                      |         |               |              |                  |                                   |             |                                |                                       |                        |
| Weight Watchers   | Usual diet     | 5               | 795             | 72.7        | 4.99 (2.78, 7.16)    | Serious | Serious       | No           | Undetected       | Mod                               | No          | Mod                            | No                                    | Yes                    |
| Zone              | Usual diet     |                 |                 |             |                      |         |               |              |                  |                                   |             |                                |                                       |                        |
| Low fat           | Dietary advice | 4               | 331             | 86.7        | 5.63 (3.76, 7.47)    | No      | Serious       | No           | Undetected       | Mod                               | No          | Mod                            | Yes                                   | Yes                    |
| Atkins            | Dietary advice |                 |                 |             |                      |         |               |              |                  |                                   |             |                                |                                       |                        |

|                   |                |    |      |      |                     |    |         |         |            |      |         |      |     |     |
|-------------------|----------------|----|------|------|---------------------|----|---------|---------|------------|------|---------|------|-----|-----|
| DASH              | Dietary advice | 2  | 778  | 0.0  | 2.87 (0.519, 5.23)  | No | No      | Serious | Undetected | Mod  | No      | Mod  | No  | Yes |
| Jenny Craig       | Dietary advice | 3  | 554  | 0.0  | 6.01 (3.72, 8.29)   | No | No      | No      | Undetected | High | No      | High | Yes | No  |
| Mediterranean     | Dietary advice | 1  | 166  | NA   | 0.692 (-3.37, 4.75) | No | No      | Serious | Undetected | Mod  | Serious | Low  | No  | Yes |
| Ornish            | Dietary advice | 1  | 93   | NA   | 3.20 (1.18, 5.22)   | No | No      | Serious | Undetected | Mod  | Serious | Low  | Yes | Yes |
| Paleolithic       | Dietary advice |    |      |      |                     |    |         |         |            |      |         |      |     |     |
| Portfolio         | Dietary advice |    |      |      |                     |    |         |         |            |      |         |      |     |     |
| Rosemary Conley   | Dietary advice | 1  | 257  | NA   | 2.38 (1.09, 3.68)   | No | No      | No      | Undetected | High | Serious | Mod  | Yes | No  |
| Slimming World    | Dietary advice | 1  | 262  | NA   | 1.34 (0.222, 2.46)  | No | No      | No      | Undetected | High | Serious | Mod  | NA  | NA  |
| South Beach       | Dietary advice |    |      |      |                     |    |         |         |            |      |         |      |     |     |
| The Biggest Loser | Dietary advice |    |      |      |                     |    |         |         |            |      |         |      |     |     |
| Volumetrics       | Dietary advice |    |      |      |                     |    |         |         |            |      |         |      |     |     |
| Weight Watchers   | Dietary advice | 7  | 2675 | 97.9 | 3.37 (2.16, 4.58)   | No | Serious | No      | Undetected | Mod  | No      | Mod  | Yes | No  |
| Zone              | Dietary advice |    |      |      |                     |    |         |         |            |      |         |      |     |     |
| Atkins            | Low fat        | 32 | 2575 | 49.8 | 1.65 (0.964, 2.34)  | No | No      | Serious | Undetected | Mod  | No      | Mod  | Yes | Yes |
| DASH              | Low fat        | 5  | 735  | 0.0  | 0.89 (-0.58, 2.35)  | No | No      | No      | Undetected | High | Serious | Mod  | Yes | No  |
| Jenny Craig       | Low fat        | 1  | 227  | NA   | 7.07 (5.89, 8.26)   | No | No      | Serious | Undetected | Mod  | Serious | Low  | Yes | Yes |
| Mediterranean     | Low fat        | 4  | 220  | 0.0  | 0.39 (-1.54, 2.37)  | No | No      | No      | Undetected | High | Serious | Mod  | No  | Yes |
| Ornish            | Low fat        | 1  | 117  | NA   | -1.10 (-3.62, 1.41) | No | No      | No      | Undetected | High | Serious | Mod  | Yes | No  |
| Paleolithic       | Low fat        | 1  | 61   | NA   | 4.91 (-0.46, 10.3)  | No | No      | No      | Undetected | High | Serious | Mod  | No  | Yes |
| Portfolio         | Low fat        | 1  | 345  | NA   | -0.13 (-2.76, 2.50) | No | No      | Serious | Undetected | Mod  | Serious | Low  | NA  | NA  |
| Rosemary Conley   | Low fat        |    |      |      |                     |    |         |         |            |      |         |      |     |     |
| Slimming World    | Low fat        |    |      |      |                     |    |         |         |            |      |         |      |     |     |
| South Beach       | Low fat        | 1  | 45   | NA   | 6.10 (3.65, 8.54)   | No | No      | No      | Undetected | High | Serious | Mod  | NA  | NA  |

|                   |         |    |     |      |                     |         |         |    |            |      |           |       |     |     |
|-------------------|---------|----|-----|------|---------------------|---------|---------|----|------------|------|-----------|-------|-----|-----|
| The Biggest Loser | Low fat |    |     |      |                     |         |         |    |            |      |           |       |     |     |
| Volumetrics       | Low fat | 1  | 71  | NA   | 2.20 (0.130, 4.27)  | Serious | No      | No | Undetected | Mod  | Serious   | Low   | NA  | NA  |
| Weight Watchers   | Low fat | 1  | 83  | NA   | -0.90 (-3.00, 1.20) | Serious | No      | No | Undetected | Mod  | Serious   | Low   | No  | Yes |
| Zone              | Low fat | 14 | 775 | 58.7 | 0.28 (-0.77, 1.35)  | No      | Serious | No | Undetected | Mod  | Serious   | Low   | Yes | Yes |
| DASH              | Atkins  |    |     |      |                     |         |         |    |            |      |           |       |     |     |
| Jenny Craig       | Atkins  |    |     |      |                     |         |         |    |            |      |           |       |     |     |
| Mediterranean     | Atkins  |    |     |      |                     |         |         |    |            |      |           |       |     |     |
| Ornish            | Atkins  | 2  | 168 | 44.7 | -2.59 (-6.01, 0.88) | No      | Serious | No | Undetected | Mod  | Serious   | Low   | Yes | Yes |
| Paleolithic       | Atkins  |    |     |      |                     |         |         |    |            |      |           |       |     |     |
| Portfolio         | Atkins  |    |     |      |                     |         |         |    |            |      |           |       |     |     |
| Rosemary Conley   | Atkins  | 1  | 81  | NA   | -0.10 (-7.60, 7.40) | Serious | No      | No | Undetected | Mod  | V serious | V low | No  | Yes |
| Slimming World    | Atkins  |    |     |      |                     |         |         |    |            |      |           |       |     |     |
| South Beach       | Atkins  |    |     |      |                     |         |         |    |            |      |           |       |     |     |
| The Biggest Loser | Atkins  |    |     |      |                     |         |         |    |            |      |           |       |     |     |
| Volumetrics       | Atkins  |    |     |      |                     |         |         |    |            |      |           |       |     |     |
| Weight Watchers   | Atkins  | 2  | 139 | 0.0  | -1.05 (-5.18, 3.07) | Serious | No      | No | Undetected | Mod  | Serious   | Low   | No  | Yes |
| Zone              | Atkins  | 4  | 257 | 0.0  | -1.63 (-4.07, 0.81) | No      | No      | No | Undetected | High | Serious   | Mod   | No  | Yes |
| Jenny Craig       | DASH    |    |     |      |                     |         |         |    |            |      |           |       |     |     |
| Mediterranean     | DASH    |    |     |      |                     |         |         |    |            |      |           |       |     |     |
| Ornish            | DASH    |    |     |      |                     |         |         |    |            |      |           |       |     |     |
| Paleolithic       | DASH    |    |     |      |                     |         |         |    |            |      |           |       |     |     |
| Portfolio         | DASH    |    |     |      |                     |         |         |    |            |      |           |       |     |     |
| Rosemary Conley   | DASH    |    |     |      |                     |         |         |    |            |      |           |       |     |     |

|                   |               |   |    |    |                     |    |    |         |            |      |           |     |     |     |  |
|-------------------|---------------|---|----|----|---------------------|----|----|---------|------------|------|-----------|-----|-----|-----|--|
| Slimming World    | DASH          |   |    |    |                     |    |    |         |            |      |           |     |     |     |  |
| South Beach       | DASH          |   |    |    |                     |    |    |         |            |      |           |     |     |     |  |
| The Biggest Loser | DASH          |   |    |    |                     |    |    |         |            |      |           |     |     |     |  |
| Volumetrics       | DASH          |   |    |    |                     |    |    |         |            |      |           |     |     |     |  |
| Weight Watchers   | DASH          |   |    |    |                     |    |    |         |            |      |           |     |     |     |  |
| Zone              | DASH          |   |    |    |                     |    |    |         |            |      |           |     |     |     |  |
| Mediterranean     | Jenny Craig   |   |    |    |                     |    |    |         |            |      |           |     |     |     |  |
| Ornish            | Jenny Craig   |   |    |    |                     |    |    |         |            |      |           |     |     |     |  |
| Paleolithic       | Jenny Craig   |   |    |    |                     |    |    |         |            |      |           |     |     |     |  |
| Portfolio         | Jenny Craig   |   |    |    |                     |    |    |         |            |      |           |     |     |     |  |
| Rosemary Conley   | Jenny Craig   |   |    |    |                     |    |    |         |            |      |           |     |     |     |  |
| Slimming World    | Jenny Craig   |   |    |    |                     |    |    |         |            |      |           |     |     |     |  |
| South Beach       | Jenny Craig   |   |    |    |                     |    |    |         |            |      |           |     |     |     |  |
| The Biggest Loser | Jenny Craig   |   |    |    |                     |    |    |         |            |      |           |     |     |     |  |
| Volumetrics       | Jenny Craig   |   |    |    |                     |    |    |         |            |      |           |     |     |     |  |
| Weight Watchers   | Jenny Craig   | 1 | 56 | NA | -0.98 (-11.2, 9.22) | No | No | No      | Undetected | High | V serious | Low | No  | Yes |  |
| Zone              | Jenny Craig   |   |    |    |                     |    |    |         |            |      |           |     |     |     |  |
| Ornish            | Mediterranean |   |    |    |                     |    |    |         |            |      |           |     |     |     |  |
| Paleolithic       | Mediterranean | 1 | 29 | NA | 1.20 (-0.91, 3.31)  | No | No | Serious | Undetected | Mod  | Serious   | Low | Yes | No  |  |
| Portfolio         | Mediterranean |   |    |    |                     |    |    |         |            |      |           |     |     |     |  |
| Rosemary Conley   | Mediterranean |   |    |    |                     |    |    |         |            |      |           |     |     |     |  |
| Slimming World    | Mediterranean |   |    |    |                     |    |    |         |            |      |           |     |     |     |  |
| South Beach       | Mediterranean |   |    |    |                     |    |    |         |            |      |           |     |     |     |  |



|                   |               |   |     |     |                     |    |    |         |            |      |           |       |     |     |  |
|-------------------|---------------|---|-----|-----|---------------------|----|----|---------|------------|------|-----------|-------|-----|-----|--|
| The Biggest Loser | Mediterranean |   |     |     |                     |    |    |         |            |      |           |       |     |     |  |
| Volumetrics       | Mediterranean |   |     |     |                     |    |    |         |            |      |           |       |     |     |  |
| Weight Watchers   | Mediterranean |   |     |     |                     |    |    |         |            |      |           |       |     |     |  |
| Zone              | Mediterranean |   |     |     |                     |    |    |         |            |      |           |       |     |     |  |
| Paleolithic       | Ornish        |   |     |     |                     |    |    |         |            |      |           |       |     |     |  |
| Portfolio         | Ornish        |   |     |     |                     |    |    |         |            |      |           |       |     |     |  |
| Rosemary Conley   | Ornish        |   |     |     |                     |    |    |         |            |      |           |       |     |     |  |
| Slimming World    | Ornish        |   |     |     |                     |    |    |         |            |      |           |       |     |     |  |
| South Beach       | Ornish        |   |     |     |                     |    |    |         |            |      |           |       |     |     |  |
| The Biggest Loser | Ornish        |   |     |     |                     |    |    |         |            |      |           |       |     |     |  |
| Volumetrics       | Ornish        |   |     |     |                     |    |    |         |            |      |           |       |     |     |  |
| Weight Watchers   | Ornish        | 1 | 51  | NA  | -2.00 (-8.10, 4.10) | No | No | Serious | Undetected | Mod  | V serious | V low | No  | Yes |  |
| Zone              | Ornish        | 2 | 150 | 0.0 | 0.053 (-3.19, 3.27) | No | No | No      | Undetected | High | Serious   | Mod   | Yes | No  |  |
| Portfolio         | Paleolithic   |   |     |     |                     |    |    |         |            |      |           |       |     |     |  |
| Rosemary Conley   | Paleolithic   |   |     |     |                     |    |    |         |            |      |           |       |     |     |  |
| Slimming World    | Paleolithic   |   |     |     |                     |    |    |         |            |      |           |       |     |     |  |
| South Beach       | Paleolithic   |   |     |     |                     |    |    |         |            |      |           |       |     |     |  |
| The Biggest Loser | Paleolithic   |   |     |     |                     |    |    |         |            |      |           |       |     |     |  |
| Volumetrics       | Paleolithic   |   |     |     |                     |    |    |         |            |      |           |       |     |     |  |
| Weight Watchers   | Paleolithic   |   |     |     |                     |    |    |         |            |      |           |       |     |     |  |
| Zone              | Paleolithic   |   |     |     |                     |    |    |         |            |      |           |       |     |     |  |
| Rosemary Conley   | Portfolio     |   |     |     |                     |    |    |         |            |      |           |       |     |     |  |
| Slimming World    | Portfolio     |   |     |     |                     |    |    |         |            |      |           |       |     |     |  |

|                   |                   |   |     |    |                     |    |    |    |            |      |         |     |    |    |  |
|-------------------|-------------------|---|-----|----|---------------------|----|----|----|------------|------|---------|-----|----|----|--|
| South Beach       | Portfolio         |   |     |    |                     |    |    |    |            |      |         |     |    |    |  |
| The Biggest Loser | Portfolio         |   |     |    |                     |    |    |    |            |      |         |     |    |    |  |
| Volumetrics       | Portfolio         |   |     |    |                     |    |    |    |            |      |         |     |    |    |  |
| Weight Watchers   | Portfolio         |   |     |    |                     |    |    |    |            |      |         |     |    |    |  |
| Zone              | Portfolio         |   |     |    |                     |    |    |    |            |      |         |     |    |    |  |
| Slimming World    | Rosemary Conley   | 1 | 165 | NA | -1.04 (-4.64, 2.56) | No | No | No | Undetected | High | Serious | Mod | NA | NA |  |
| South Beach       | Rosemary Conley   |   |     |    |                     |    |    |    |            |      |         |     |    |    |  |
| The Biggest Loser | Rosemary Conley   |   |     |    |                     |    |    |    |            |      |         |     |    |    |  |
| Volumetrics       | Rosemary Conley   |   |     |    |                     |    |    |    |            |      |         |     |    |    |  |
| Weight Watchers   | Rosemary Conley   | 2 | 254 | NA | -0.30 (-4.28, 3.68) | No | No | No | Undetected | High | Serious | Mod | NA | NA |  |
| Zone              | Rosemary Conley   |   |     |    |                     |    |    |    |            |      |         |     |    |    |  |
| South Beach       | Slimming World    |   |     |    |                     |    |    |    |            |      |         |     |    |    |  |
| The Biggest Loser | Slimming World    |   |     |    |                     |    |    |    |            |      |         |     |    |    |  |
| Volumetrics       | Slimming World    |   |     |    |                     |    |    |    |            |      |         |     |    |    |  |
| Weight Watchers   | Slimming World    | 1 | 171 | NA | 0.90 (-2.22, 4.02)  | No | No | No | Undetected | High | Serious | Mod | NA | NA |  |
| Zone              | Slimming World    |   |     |    |                     |    |    |    |            |      |         |     |    |    |  |
| The Biggest Loser | South Beach       |   |     |    |                     |    |    |    |            |      |         |     |    |    |  |
| Volumetrics       | South Beach       |   |     |    |                     |    |    |    |            |      |         |     |    |    |  |
| Weight Watchers   | South Beach       |   |     |    |                     |    |    |    |            |      |         |     |    |    |  |
| Zone              | South Beach       |   |     |    |                     |    |    |    |            |      |         |     |    |    |  |
| Volumetrics       | The Biggest Loser |   |     |    |                     |    |    |    |            |      |         |     |    |    |  |
| Weight Watchers   | The Biggest Loser |   |     |    |                     |    |    |    |            |      |         |     |    |    |  |

|                 |                   |   |    |    |                    |    |    |         |            |     |           |       |    |     |
|-----------------|-------------------|---|----|----|--------------------|----|----|---------|------------|-----|-----------|-------|----|-----|
| Zone            | The Biggest Loser |   |    |    |                    |    |    |         |            |     |           |       |    |     |
| Weight Watchers | Volumetrics       |   |    |    |                    |    |    |         |            |     |           |       |    |     |
| Zone            | Volumetrics       |   |    |    |                    |    |    |         |            |     |           |       |    |     |
| Zone            | Weight Watchers   | 1 | 56 | NA | 0.50 (-3.87, 4.87) | No | No | Serious | Undetected | Mod | V serious | V low | No | Yes |

Table S29 continued: GRADE assessment for 6-month weight loss in individual popular diets NMA

| Comparison groups |             | Indirect evidence  |                                           |                      |                |                                     |             |                                  | Network evidence   |                      |                                                          |             |                 |                      |
|-------------------|-------------|--------------------|-------------------------------------------|----------------------|----------------|-------------------------------------|-------------|----------------------------------|--------------------|----------------------|----------------------------------------------------------|-------------|-----------------|----------------------|
| Arm 1             | Arm 2 (Ref) | MD (95%CrI)        | First order loop of the most contribution | Low est of C1 and C2 | Intransitivity | Indirect rating without imprecision | Imprecision | Indirect rating with imprecision | MD (95%CrI)        | Incoherence, P-value | Higher rating of direct and indirect without imprecision | Incoherence | NMA Imprecision | Final network rating |
| Dietary advice    | Usual diet  | 0.73 (-0.75, 2.22) | Weight Watchers                           | Mod                  | No             | Mod                                 | Serious     | Low                              | 0.31 (-0.94, 1.59) | 0.516                | High                                                     | No          | Serious         | Mod                  |
| Low fat           | Usual diet  | 2.76 (1.33, 4.24)  | DASH                                      | Low                  | No             | Low                                 | No          | Low                              | 3.76 (2.70, 4.86)  | 0.046                | Mod                                                      | Serious     | No              | Low                  |
| Atkins            | Usual diet  | 5.35 (4.07, 6.66)  | Low fat                                   | Mod                  | No             | Mod                                 | No          | Mod                              | 5.46 (4.19, 6.75)  | 0.209                | Mod                                                      | No          | No              | Mod                  |
| DASH              | Usual diet  | 4.59 (2.65, 6.55)  | Low fat                                   | Mod                  | No             | Mod                                 | No          | Mod                              | 3.63 (2.52, 4.76)  | 0.233                | Mod                                                      | No          | No              | Mod                  |
| Jenny Craig       | Usual diet  | 8.12 (5.79, 10.50) | Dietary advice                            | High                 | No             | High                                | No          | High                             | 7.77 (5.51, 10.00) | 0.559                | High                                                     | No          | No              | High                 |
| Mediterranean     | Usual diet  | 4.69 (2.12, 7.26)  | Low fat                                   | Mod                  | Serious        | Low                                 | No          | Low                              | 2.87 (1.60, 4.21)  | 0.103                | Mod                                                      | No          | No              | Mod                  |
| Ornish            | Usual diet  | 3.64 (1.33, 5.99)  | Low fat                                   | Mod                  | No             | Mod                                 | No          | Mod                              | 3.64 (1.33, 5.99)  | NA                   | Mod                                                      | No          | No              | Mod                  |
| Paleolithic       | Usual diet  | 5.31 (1.89, 8.82)  | Mediterranean                             | Mod                  | No             | Mod                                 | No          | Mod                              | 5.31 (1.89, 8.82)  | NA                   | Mod                                                      | No          | No              | Mod                  |
| Portfolio         | Usual diet  | 3.64 (-0.68, 7.96) | Low fat                                   | Mod                  | Serious        | Low                                 | Serious     | V low                            | 3.64 (-0.68, 7.96) | NA                   | Low                                                      | No          | Serious         | V low                |
| Rosemary Conley   | Usual diet  | NA                 |                                           |                      |                |                                     |             |                                  | 3.76 (1.13, 6.45)  | NA                   | Mod                                                      | No          | No              | Mod                  |
| Slimming World    | Usual diet  | NA                 |                                           |                      |                |                                     |             |                                  | 2.15 (-0.78, 5.11) | NA                   | High                                                     | No          | Serious         | Mod                  |
| South Beach       | Usual diet  | 9.86 (5.64, 14.08) | Low fat                                   | Mod                  | No             | Mod                                 | No          | Mod                              | 9.86 (5.64, 14.08) | NA                   | Mod                                                      | No          | Serious         | Low                  |
| The Biggest Loser | Usual diet  | NA                 |                                           |                      |                |                                     |             |                                  | 2.88 (-0.44, 6.18) | NA                   | High                                                     | No          | Serious         | Mod                  |
| Volumetrics       | Usual diet  | 5.95 (1.97, 9.98)  | Low fat                                   | Mod                  | No             | Mod                                 | No          | Mod                              | 5.95 (1.97, 9.98)  | NA                   | Mod                                                      | No          | No              | Mod                  |

|                   |                |                     |                 |      |         |     |         |       |                     |       |      |         |         |       |
|-------------------|----------------|---------------------|-----------------|------|---------|-----|---------|-------|---------------------|-------|------|---------|---------|-------|
| Weight Watchers   | Usual diet     | 3.42 (1.53, 5.32)   | Dietary advice  | Mod  | No      | Mod | No      | Mod   | 3.90 (2.52, 5.31)   | 0.423 | Mod  | No      | No      | Mod   |
| Zone              | Usual diet     | 4.07 (2.57, 5.60)   | Low fat         | Mod  | No      | Mod | No      | Mod   | 4.07 (2.57, 5.60)   | NA    | Mod  | No      | No      | Mod   |
| Low fat           | Dietary advice | 2.30 (0.85, 3.76)   | Usual diet      | Mod  | No      | Mod | Serious | Low   | 3.46 (2.26, 4.66)   | 0.011 | Mod  | Serious | No      | Low   |
| Atkins            | Dietary advice | 5.15 (3.78, 6.52)   | Low fat         | Mod  | No      | Mod | No      | Mod   | 5.15 (3.78, 6.52)   | NA    | Mod  | No      | No      | Mod   |
| DASH              | Dietary advice | 3.48 (1.83, 5.11)   | Usual diet      | Low  | No      | Low | No      | Low   | 3.33 (1.93, 4.71)   | 0.706 | Mod  | No      | No      | Mod   |
| Jenny Craig       | Dietary advice | 11.00 (7.41, 14.50) |                 |      |         |     |         |       | 7.46 (5.39, 9.50)   | 0.019 | High | Serious | No      | Mod   |
| Mediterranean     | Dietary advice | 2.77 (1.06, 4.52)   | Usual diet      | Mod  | No      | Mod | No      | Mod   | 2.57 (0.94, 4.22)   | 0.458 | Mod  | No      | No      | Mod   |
| Ornish            | Dietary advice | 3.41 (0.62, 6.25)   | Low fat         | Mod  | No      | Mod | Serious | Low   | 3.33 (1.08, 5.60)   | 0.931 | Mod  | No      | No      | Mod   |
| Paleolithic       | Dietary advice | 5.01 (1.46, 8.61)   | Low fat         | Mod  | No      | Mod | No      | Mod   | 5.01 (1.46, 8.61)   | NA    | Mod  | No      | No      | Mod   |
| Portfolio         | Dietary advice | 3.33 (-1.03, 7.69)  | Low fat         | Mod  | Serious | Low | Serious | V low | 3.33 (-1.03, 7.69)  | NA    | Low  | No      | Serious | V low |
| Rosemary Conley   | Dietary advice | 6.10 (0.67, 11.50)  | weight Watchers |      |         |     |         |       | 3.46 (0.843, 6.13)  | 0.256 | High | No      | Serious | Mod   |
| Slimming World    | Dietary advice | NA                  |                 |      |         |     |         |       | 1.85 (-1.05, 4.75)  | NA    | High | No      | Serious | Mod   |
| South Beach       | Dietary advice | 9.56 (5.30, 13.80)  | Low fat         | Mod  | No      | Mod | No      | Mod   | 9.56 (5.30, 13.8)   | NA    | Mod  | No      | No      | Low   |
| The Biggest Loser | Dietary advice | 2.58 (-0.99, 6.11)  | Usual diet      | High | Serious | Mod | Serious | Low   | 2.58 (-0.99, 6.11)  | NA    | Mod  | No      | Serious | Low   |
| Volumetrics       | Dietary advice | 5.65 (1.63, 9.69)   | Low fat         | Mod  | No      | Mod | No      | Mod   | 5.65 (1.63, 9.69)   | NA    | Mod  | No      | No      | Mod   |
| Weight Watchers   | Dietary advice | 4.26 (1.95, 6.55)   | Low fat         | Mod  | No      | Mod | No      | Mod   | 3.60 (2.42, 4.77)   | 0.482 | Mod  | No      | No      | Mod   |
| Zone              | Dietary advice | 3.77 (2.19, 5.35)   | Low fat         | Mod  | No      | Mod | No      | Mod   | 3.77 (2.19, 5.35)   | NA    | Mod  | No      | No      | Mod   |
| Atkins            | Low fat        | 1.26 (-2.00, 4.50)  | Zone            | Mod  | No      | Mod | Serious | Low   | 1.69 (0.97, 2.43)   | 0.807 | Mod  | No      | No      | Mod   |
| DASH              | Low fat        | -1.29 (-3.01, 0.43) |                 |      |         |     |         |       | -0.13 (-1.33, 1.06) | 0.069 | High | No      | Serious | Mod   |
| Jenny Craig       | Low fat        | 2.06 (-0.58, 4.71)  | Dietary advice  | Mod  | No      | Mod | Serious | Low   | 4.01 (1.83, 6.13)   | 0.022 | Mod  | Serious | No      | Low   |
| Mediterranean     | Low fat        | -1.90 (-3.77, 0.02) | Usual diet      | Mod  | No      | Mod | Serious | Low   | -0.89 (-2.30, 0.56) | 0.109 | High | No      | Serious | Mod   |

|                   |         |                      |                     |     |         |     |         |       |                      |       |      |    |         |       |
|-------------------|---------|----------------------|---------------------|-----|---------|-----|---------|-------|----------------------|-------|------|----|---------|-------|
| Ornish            | Low fat | 0.831 (-2.22, 3.92)  |                     |     |         |     |         |       | -0.12 (-2.29, 2.07)  | 0.434 | High | No | Serious | Mod   |
| Paleolithic       | Low fat | 0.13 (-3.98, 4.27)   | Mediterranean       | Mod | No      | Mod | Serious | Low   | 1.57 (-1.88, 5.04)   | 0.213 | High | No | Serious | Mod   |
| Portfolio         | Low fat | NA                   |                     |     |         |     |         |       | -0.13 (-4.31, 4.05)  | NA    | Mod  | No | Serious | Low   |
| Rosemary Conley   | Low fat | 0.00 (-2.69, 2.71)   | Usual diet          | Mod | Serious | Low | Serious | V low | 0.00 (-2.69, 2.71)   | NA    | Low  | No | Serious | V low |
| Slimming World    | Low fat | -1.61 (-4.61, 1.39)  | Usual diet          | Mod | No      | Mod | Serious | Low   | -1.61 (-4.61, 1.39)  | NA    | Mod  | No | Serious | Low   |
| South Beach       | Low fat | NA                   |                     |     |         |     |         |       | 6.1 (2.02, 10.17)    | NA    | High | No | Serious | Mod   |
| The Biggest Loser | Low fat | -0.89 (-4.38, 2.58)  | Usual diet          | Mod | Serious | Low | Serious | V low | -0.89 (-4.38, 2.58)  | NA    | Low  | No | Serious | V low |
| Volumetrics       | Low fat | NA                   |                     |     |         |     |         |       | 2.19 (-1.66, 6.04)   | NA    | Mod  | No | Serious | Low   |
| Weight Watchers   | Low fat | 0.29 (-1.20, 1.77)   | Dietary advice      | Mod | No      | Mod | Serious | Low   | 0.19 (-1.25, 1.52)   | 0.571 | Mod  | No | Serious | Low   |
| Zone              | Low fat | 0.26 (-3.79, 4.31)   | Atkins              | Mod | No      | Mod | Serious | Low   | 0.310 (-0.76, 1.40)  | 0.991 | Mod  | No | Serious | Low   |
| DASH              | Atkins  | -1.82 (-3.21, -0.45) | Low fat             | Mod | No      | Mod | Serious | Low   | -1.82 (-3.21, -0.45) | NA    | Mod  | No | Serious | Low   |
| Jenny Craig       | Atkins  | 2.31 (0.06, 4.55)    | Low fat             | Mod | Serious | Low | Serious | V low | 2.31 (0.06, 4.55)    | NA    | Low  | No | Serious | V low |
| Mediterranean     | Atkins  | -2.59 (-4.16, -0.98) | Low fat             | Mod | No      | Mod | Serious | Low   | -2.59 (-4.16, -0.98) | NA    | Mod  | No | Serious | Low   |
| Ornish            | Atkins  | -1.90 (-6.04, 2.24)  | Low fat             | Mod | No      | Mod | Serious | Low   | -1.82 (-4.03, 0.42)  | 0.919 | Mod  | No | Serious | Low   |
| Paleolithic       | Atkins  | -0.14 (-3.64, 3.41)  | Low fat             | Mod | No      | Mod | Serious | Low   | -0.14 (-3.64, 3.41)  | NA    | Mod  | No | Serious | Low   |
| Portfolio         | Atkins  | -1.82 (-6.07, 2.42)  | Low fat             | Mod | Serious | Low | Serious | V low | -1.82 (-6.07, 2.42)  | NA    | Low  | No | Serious | V low |
| Rosemary Conley   | Atkins  | -2.43 (-5.59, 0.72)  | Low fat, Usual diet | Mod | Serious | Low | Serious | V low | -1.69 (-4.45, 1.09)  | 0.52  | Mod  | No | Serious | Low   |
| Slimming World    | Atkins  | -3.31 (-6.36, -0.24) | Low fat, Usual diet | Mod | No      | Mod | Serious | Low   | -3.31 (-6.36, -0.24) | NA    | Mod  | No | Serious | Low   |
| South Beach       | Atkins  | 4.41 (0.26, 8.53)    | Low fat             | Mod | No      | Mod | Serious | Low   | 4.41 (0.26, 8.53)    | NA    | Mod  | No | Serious | Low   |
| The Biggest Loser | Atkins  | -2.58 (-6.14, 0.95)  | Low fat, Usual diet | Mod | No      | Mod | Serious | Low   | -2.58 (-6.14, 0.95)  | NA    | Mod  | No | Serious | Low   |
| Volumetrics       | Atkins  | 0.50 (-3.42, 4.41)   | Low fat             | Mod | No      | Mod | Serious | Low   | 0.50 (-3.42, 4.41)   | NA    | Mod  | No | Serious | Low   |

|                   |             |                      |                |      |         |       |         |       |                      |       |       |    |         |       |
|-------------------|-------------|----------------------|----------------|------|---------|-------|---------|-------|----------------------|-------|-------|----|---------|-------|
| Weight Watchers   | Atkins      | -1.58 (-3.28, 0.11)  | Low fat        | Mod  | No      | Mod   | Serious | Low   | -1.55 (-3.09, -0.04) | 0.787 | Mod   | No | Serious | Low   |
| Zone              | Atkins      | -1.23 (-2.77, 0.31)  | Low fat        | Mod  | No      | Mod   | Serious | Low   | -1.38 (-2.62, -0.14) | 0.793 | High  | No | Serious | Mod   |
| Jenny Craig       | DASH        | 4.14 (1.82, 6.45)    | Usual diet     | Low  | No      | Low   | No      | Low   | 4.14 (1.82, 6.45)    | NA    | Low   | No | No      | Low   |
| Mediterranean     | DASH        | -0.76 (-2.34, 0.87)  | Usual diet     | Low  | No      | Low   | Serious | V low | -0.76 (-2.34, 0.87)  | NA    | Low   | No | Serious | V low |
| Ornish            | DASH        | 0 (-2.38, 2.42)      | Low fat        | High | No      | High  | Serious | Mod   | 0 (-2.38, 2.42)      | NA    | High  | No | Serious | Mod   |
| Paleolithic       | DASH        | 1.68 (-1.84, 5.29)   | Low fat        | High | No      | High  | Serious | Mod   | 1.68 (-1.84, 5.29)   | NA    | High  | No | Serious | Mod   |
| Portfolio         | DASH        | 0.01 (-4.35, 4.35)   | Low fat        | Mod  | Serious | Low   | Serious | V low | 0.01 (-4.35, 4.35)   | NA    | Low   | No | Serious | V low |
| Rosemary Conley   | DASH        | 0.13 (-2.63, 2.93)   | Usual diet     | Low  | Serious | V low | Serious | V low | 0.13 (-2.63, 2.93)   | NA    | V low | No | Serious | V low |
| Slimming World    | DASH        | -1.48 (-4.53, 1.59)  | Usual diet     | Low  | No      | Low   | No      | Low   | -1.48 (-4.53, 1.59)  | NA    | Low   | No | Serious | V low |
| South Beach       | DASH        | 6.23 (1.98, 10.48)   | Low fat        | High | No      | High  | No      | High  | 6.23 (1.98, 10.48)   | NA    | High  | No | No      | Mod   |
| The Biggest Loser | DASH        | -0.76 (-4.26, 2.73)  | Usual diet     | Low  | Serious | V low | Serious | V low | -0.76 (-4.26, 2.73)  | NA    | V low | No | Serious | V low |
| Volumetrics       | DASH        | 2.32 (-1.7, 6.37)    | Low fat        | Mod  | No      | Mod   | Serious | Low   | 2.32 (-1.70, 6.37)   | NA    | Mod   | No | Serious | Low   |
| Weight Watchers   | DASH        | 0.26 (-1.29, 1.83)   | Usual diet     | Low  | No      | Low   | Serious | V low | 0.26 (-1.29, 1.83)   | NA    | Low   | No | Serious | V low |
| Zone              | DASH        | 0.44 (-1.15, 2.04)   | Low fat        | Mod  | No      | Mod   | Serious | Low   | 0.44 (-1.15, 2.04)   | NA    | Mod   | No | Serious | Low   |
| Mediterranean     | Jenny Craig | -4.90 (-7.33, -2.39) | Low fat        | Mod  | No      | Mod   | No      | Mod   | -4.90 (-7.33, -2.39) | NA    | Mod   | No | No      | Low   |
| Ornish            | Jenny Craig | -4.14 (-7.03, -1.15) | Low fat        | Mod  | No      | Mod   | No      | Mod   | -4.14 (-7.03, -1.15) | NA    | Mod   | No | No      | Low   |
| Paleolithic       | Jenny Craig | -2.46 (-6.42, 1.6)   | Low fat        | Mod  | No      | Mod   | Serious | Low   | -2.46 (-6.42, 1.60)  | NA    | Mod   | No | Serious | Low   |
| Portfolio         | Jenny Craig | -4.14 (-8.83, 0.58)  | Low fat        | Mod  | Serious | Low   | Serious | V low | -4.14 (-8.83, 0.58)  | NA    | Low   | No | Serious | V low |
| Rosemary Conley   | Jenny Craig | -4.01 (-7.25, -0.7)  | Usual diet     | Mod  | Serious | Low   | No      | Low   | -4.01 (-7.25, -0.70) | NA    | Low   | No | No      | V low |
| Slimming World    | Jenny Craig | -5.62 (-9.1, -2.11)  | Dietary advice | High | No      | High  | No      | High  | -5.62 (-9.1, -2.11)  | NA    | High  | No | No      | Mod   |
| South Beach       | Jenny Craig | 2.09 (-2.49, 6.71)   | Low fat        | Mod  | No      | Mod   | Serious | Low   | 2.09 (-2.49, 6.71)   | NA    | Mod   | No | Serious | Low   |

|                   |               |                      |                     |      |         |      |         |       |                      |       |      |    |         |       |
|-------------------|---------------|----------------------|---------------------|------|---------|------|---------|-------|----------------------|-------|------|----|---------|-------|
| The Biggest Loser | Jenny Craig   | -4.89 (-8.88, -0.9)  | Usual diet          | High | Serious | Mod  | No      | Mod   | -4.89 (-8.88, -0.90) | NA    | Mod  | No | No      | Low   |
| Volumetrics       | Jenny Craig   | -1.82 (-6.20, 2.61)  | Low fat             | Mod  | No      | Mod  | Serious | Low   | -1.82 (-6.20, 2.61)  | NA    | Mod  | No | Serious | Low   |
| Weight Watchers   | Jenny Craig   | -4.24 (-6.61, -1.87) | Dietary advice      | Mod  | Serious | Low  | No      | Low   | -3.87 (-6.12, -1.58) | 0.455 | Low  | No | No      | Low   |
| Zone              | Jenny Craig   | -3.69 (-6.06, -1.30) | Low fat             | Mod  | No      | Mod  | No      | Mod   | -3.69 (-6.06, -1.30) | NA    | Mod  | No | No      | Low   |
| Ornish            | Mediterranean | 0.77 (-1.76, 3.30)   | Low fat             | High | No      | High | Serious | Mod   | 0.77 (-1.76, 3.30)   | NA    | High | No | Serious | Mod   |
| Paleolithic       | Mediterranean | 5.96 (-0.48, 12.40)  |                     |      |         |      |         |       | 2.45 (-0.86, 5.80)   | 0.212 | Mod  | No | Serious | Low   |
| Portfolio         | Mediterranean | 0.77 (-3.68, 5.16)   | Low fat             | Mod  | Serious | Low  | Serious | V low | 0.77 (-3.68, 5.16)   | NA    | Low  | No | Serious | V low |
| Rosemary Conley   | Mediterranean | 0.89 (-1.99, 3.78)   | Usual diet          | Mod  | Serious | Low  | Serious | V low | 0.89 (-1.99, 3.78)   | NA    | Low  | No | Serious | V low |
| Slimming World    | Mediterranean | -0.72 (-3.90, 2.42)  | Usual diet          | Mod  | No      | Mod  | Serious | Low   | -0.72 (-3.90, 2.42)  | NA    | Mod  | No | Serious | Low   |
| South Beach       | Mediterranean | 6.99 (2.66, 11.28)   | Low fat             | High | No      | High | No      | High  | 6.99 (2.66, 11.28)   | NA    | High | No | No      | Mod   |
| The Biggest Loser | Mediterranean | 0.01 (-3.59, 3.52)   | Usual diet          | Mod  | Serious | Low  | Serious | V low | 0.01 (-3.59, 3.52)   | NA    | Low  | No | Serious | V low |
| Volumetrics       | Mediterranean | 3.08 (-1.04, 7.18)   | Low fat             | Mod  | No      | Mod  | Serious | Low   | 3.08 (-1.04, 7.18)   | NA    | Mod  | No | Serious | Low   |
| Weight Watchers   | Mediterranean | 1.03 (-0.76, 2.77)   | Usual diet          | Mod  | No      | Mod  | Serious | Low   | 1.03 (-0.76, 2.77)   | NA    | Mod  | No | Serious | Low   |
| Zone              | Mediterranean | 1.20 (-0.59, 2.97)   | Low fat             | Mod  | No      | Mod  | Serious | Low   | 1.20 (-0.59, 2.97)   | NA    | Mod  | No | Serious | Low   |
| Paleolithic       | Ornish        | 1.68 (-2.36, 5.75)   | Low fat             | High | No      | High | Serious | Mod   | 1.68 (-2.36, 5.75)   | NA    | High | No | Serious | Mod   |
| Portfolio         | Ornish        | 0.00 (-4.74, 4.68)   | Low fat             | Mod  | Serious | Low  | Serious | V low | 0.00 (-4.74, 4.68)   | NA    | Low  | No | Serious | V low |
| Rosemary Conley   | Ornish        | 0.12 (-3.22, 3.47)   | Dietary advice      | Mod  | Serious | Low  | Serious | V low | 0.12 (-3.22, 3.47)   | NA    | Low  | No | Serious | V low |
| Slimming World    | Ornish        | -1.49 (-5.07, 2.09)  | Dietary advice      | Mod  | No      | Mod  | Serious | Low   | -1.49 (-5.07, 2.09)  | NA    | Mod  | No | Serious | Low   |
| South Beach       | Ornish        | 6.22 (1.59, 10.84)   | Low fat             | High | No      | High | No      | High  | 6.22 (1.59, 10.84)   | NA    | High | No | No      | Mod   |
| The Biggest Loser | Ornish        | -0.76 (-4.83, 3.26)  | Usual diet, Low fat | High | Serious | Mod  | Serious | Low   | -0.76 (-4.83, 3.26)  | NA    | Mod  | No | Serious | Low   |
| Volumetrics       | Ornish        | 2.32 (-2.11, 6.72)   | Low fat             | Mod  | No      | Mod  | Serious | Low   | 2.32 (-2.11, 6.72)   | NA    | Mod  | No | Serious | Low   |



|                   |                 |                     |                           |      |         |      |         |       |                     |       |      |    |         |       |
|-------------------|-----------------|---------------------|---------------------------|------|---------|------|---------|-------|---------------------|-------|------|----|---------|-------|
| Weight Watchers   | Ornish          | 0.92 (-1.78, 3.62)  | Dietary advice            | Mod  | No      | Mod  | Serious | Low   | 0.26 (-2.14, 2.64)  | 0.329 | Mod  | No | Serious | Low   |
| Zone              | Ornish          | 0.65 (-3.56, 4.88)  |                           |      |         |      |         |       | 0.44 (-1.87, 2.72)  | 0.745 | High | No | Serious | Mod   |
| Portfolio         | Paleolithic     | -1.68 (-7.16, 3.72) | Low fat                   | Mod  | Serious | Low  | Serious | V low | -1.68 (-7.16, 3.72) | NA    | Low  | No | Serious | V low |
| Rosemary Conley   | Paleolithic     | -1.55 (-5.85, 2.73) | Mediterranean, Usual diet | Mod  | No      | Mod  | Serious | Low   | -1.55 (-5.85, 2.73) | NA    | Mod  | No | Serious | Low   |
| Slimming World    | Paleolithic     | -3.16 (-7.68, 1.28) | Mediterranean, Usual diet | Mod  | No      | Mod  | Serious | Low   | -3.16 (-7.68, 1.28) | NA    | Mod  | No | Serious | Low   |
| South Beach       | Paleolithic     | 4.55 (-0.83, 9.85)  | Low fat                   | High | No      | High | Serious | Mod   | 4.55 (-0.83, 9.85)  | NA    | High | No | Serious | Mod   |
| The Biggest Loser | Paleolithic     | -2.44 (-7.27, 2.29) | Mediterranean, Usual diet | Mod  | Serious | Low  | Serious | V low | -2.44 (-7.27, 2.29) | NA    | Low  | No | Serious | V low |
| Volumetrics       | Paleolithic     | 0.64 (-4.54, 5.77)  | Low fat                   | Mod  | No      | Mod  | Serious | Low   | 0.64 (-4.54, 5.77)  | NA    | Mod  | No | Serious | Low   |
| Weight Watchers   | Paleolithic     | -1.42 (-5.08, 2.2)  | Mediterranean, Usual diet | Mod  | No      | Mod  | Serious | Low   | -1.42 (-5.08, 2.2)  | NA    | Mod  | No | Serious | Low   |
| Zone              | Paleolithic     | -1.25 (-4.88, 2.36) | Low fat                   | Mod  | No      | Mod  | Serious | Low   | -1.25 (-4.88, 2.36) | NA    | Mod  | No | Serious | Low   |
| Rosemary Conley   | Portfolio       | 0.13 (-4.84, 5.13)  | Usual diet, Low fat       | Mod  | Serious | Low  | Serious | V low | 0.13 (-4.84, 5.13)  | NA    | Low  | No | Serious | V low |
| Slimming World    | Portfolio       | -1.49 (-6.62, 3.68) | Usual diet, Low fat       | Mod  | Serious | Low  | Serious | V low | -1.49 (-6.62, 3.68) | NA    | Low  | No | Serious | V low |
| South Beach       | Portfolio       | 6.22 (0.39, 12.06)  | Low fat                   | Mod  | Serious | Low  | Serious | V low | 6.22 (0.39, 12.06)  | NA    | Low  | No | Serious | V low |
| The Biggest Loser | Portfolio       | -0.75 (-6.21, 4.67) | Usual diet, Low fat       | Mod  | Serious | Low  | Serious | V low | -0.75 (-6.21, 4.67) | NA    | Low  | No | Serious | V low |
| Volumetrics       | Portfolio       | 2.32 (-3.36, 8.03)  | Low fat                   | Mod  | Serious | Low  | Serious | V low | 2.32 (-3.36, 8.03)  | NA    | Low  | No | Serious | V low |
| Weight Watchers   | Portfolio       | 0.26 (-4.14, 4.67)  | Low fat                   | Mod  | Serious | Low  | Serious | V low | 0.26 (-4.14, 4.67)  | NA    | Low  | No | Serious | V low |
| Zone              | Portfolio       | 0.43 (-3.88, 4.76)  | Low fat                   | Mod  | Serious | Low  | Serious | V low | 0.43 (-3.88, 4.76)  | NA    | Low  | No | Serious | V low |
| Slimming World    | Rosemary Conley | NA                  |                           |      |         |      |         |       | -1.61 (-5.00, 1.75) | NA    | High | No | Serious | Mod   |
| South Beach       | Rosemary Conley | 6.11 (1.20, 10.97)  | Usual diet, Low fat       | Mod  | No      | Mod  | No      | Mod   | 6.11 (1.20, 10.97)  | NA    | Mod  | No | No      | Low   |
| The Biggest Loser | Rosemary Conley | -0.88 (-5.18, 3.34) | Usual diet                | Mod  | Serious | Low  | Serious | V low | -0.88 (-5.18, 3.34) | NA    | Low  | No | Serious | V low |
| Volumetrics       | Rosemary Conley | 2.20 (-2.53, 6.90)  | Usual diet, Low fat       | Mod  | No      | Mod  | Serious | Mod   | 2.20 (-2.53, 6.90)  | NA    | Mod  | No | Serious | Low   |

|                   |                   |                       |                         |      |         |      |         |       |                       |       |      |    |         |       |
|-------------------|-------------------|-----------------------|-------------------------|------|---------|------|---------|-------|-----------------------|-------|------|----|---------|-------|
| Weight Watchers   | Rosemary Conley   | NA                    |                         |      |         |      |         |       | 0.14 (-2.53, 2.76)    | NA    | High | No | Serious | Mod   |
| Zone              | Rosemary Conley   | 0.31 (-2.59, 3.18)    | Usual diet, Low fat     | Mod  | Serious | Low  | Serious | V low | 0.31 (-2.59, 3.18)    | NA    | Low  | No | Serious | V low |
| South Beach       | Slimming World    | 7.72 (2.65, 12.75)    | Usual diet, Low fat     | High | No      | High | No      | High  | 7.72 (2.65, 12.75)    | NA    | High | No | No      | Mod   |
| The Biggest Loser | Slimming World    | 0.72 (-3.70, 5.14)    | Usual diet              | High | Serious | Mod  | Serious | Low   | 0.72 (-3.7, 5.14)     | NA    | Mod  | No | Serious | Low   |
| Volumetric s      | Slimming World    | 3.80 (-1.08, 8.69)    | Usual diet, Low fat     | Mod  | No      | Mod  | Serious | Low   | 3.80 (-1.08, 8.69)    | NA    | Mod  | No | Serious | Low   |
| Weight Watchers   | Slimming World    | NA                    |                         |      |         |      |         |       | 1.75 (-1.19, 4.67)    | NA    | High | No | Serious | Mod   |
| Zone              | Slimming World    | 1.92 (-1.24, 5.09)    | Usual diet, Low fat     | High | No      | High | Serious | Mod   | 1.92 (-1.24, 5.09)    | NA    | High | No | Serious | Mod   |
| The Biggest Loser | South Beach       | -6.99 (-12.35, -1.67) | Usual diet, Low fat     | High | Serious | Mod  | No      | Mod   | -6.99 (-12.35, -1.67) | NA    | Mod  | No | No      | Low   |
| Volumetric s      | South Beach       | -3.9 (-9.53, 1.68)    | Low fat                 | Mod  | No      | Mod  | Serious | Low   | -3.90 (-9.53, 1.68)   | NA    | Mod  | No | Serious | Low   |
| Weight Watchers   | South Beach       | -5.96 (-10.25, -1.67) | Low fat                 | Mod  | No      | Mod  | No      | Mod   | -5.96 (-10.25, -1.67) | NA    | Mod  | No | No      | Low   |
| Zone              | South Beach       | -5.79 (-10.01, -1.56) | Low fat                 | Mod  | No      | Mod  | No      | Mod   | -5.79 (-10.01, -1.56) | NA    | Mod  | No | Serious | Low   |
| Volumetric s      | The Biggest Loser | 3.07 (-2.08, 8.29)    | Usual diet, Low fat     | Mod  | Serious | Low  | Serious | V low | 3.07 (-2.08, 8.29)    | NA    | Low  | No | Serious | V low |
| Weight Watchers   | The Biggest Loser | 1.02 (-2.55, 4.62)    | Usual diet              | Mod  | Serious | Low  | Serious | V low | 1.02 (-2.55, 4.62)    | NA    | Low  | No | Serious | V low |
| Zone              | The Biggest Loser | 1.19 (-2.42, 4.86)    | Usual diet, Low fat     | High | Serious | Mod  | Serious | Low   | 1.19 (-2.42, 4.86)    | NA    | Mod  | No | Serious | Low   |
| Weight Watchers   | Volumetric s      | -2.05 (-6.15, 2.02)   | Low fat, dietary advice | Mod  | No      | Mod  | Serious | Low   | -2.05 (-6.15, 2.02)   | NA    | Mod  | No | Serious | Low   |
| Zone              | Volumetric s      | -1.88 (-5.88, 2.12)   | Low fat                 | Mod  | No      | Mod  | Serious | Low   | -1.88 (-5.88, 2.12)   | NA    | Mod  | No | Serious | Low   |
| Zone              | Weight Watchers   | 0.107 (-1.73, 1.96)   | Low fat                 | Mod  | No      | Mod  | Serious | Low   | 0.17 (-1.52, 1.88)    | 0.879 | Mod  | No | Serious | Low   |

\* Although the credible interval of network evidence was narrow, we rated down one level for imprecision because these direct evidence informed indirect evidence had a large estimated effect with small sample size

Table S30: GRADE assessment for 6-month SBP reduction in individual popular diets NMA

| Arm 1             | Arm 2 (Ref)    | No. of study | No. of patients | I-square, % | MD (95%CrI)           | RoB     | Inconsistency | Indirectness | Publication bias | Direct rating without imprecision | Imprecision | Direct rating with imprecision | Direct is more precise than indirect? | Need to rate indirect? |
|-------------------|----------------|--------------|-----------------|-------------|-----------------------|---------|---------------|--------------|------------------|-----------------------------------|-------------|--------------------------------|---------------------------------------|------------------------|
| Dietary advice    | Usual diet     | 1            | 65              | NA          | -0.39 (-17.30, 16.50) | Serious | No            | No           | Undetected       | Mod                               | V serious   | V low                          | No                                    | Yes                    |
| Low fat           | Usual diet     | 4            | 723             | 0.0         | 4.82 (1.54, 8.28)     | No      | No            | No           | Undetected       | High                              | Serious     | Mod                            | No                                    | Yes                    |
| Atkins            | Usual diet     | 1            | 80              | NA          | 4.40 (-3.43, 12.2)    | Serious | No            | No           | Undetected       | Mod                               | V serious   | V low                          | No                                    | Yes                    |
| DASH              | Usual diet     | 8            | 1150            | 84.1        | 4.67 (2.45, 6.99)     | No      | Serious       | Serious      | Undetected       | Low                               | Serious     | V low                          | Yes                                   | Yes                    |
| Jenny Craig       | Usual diet     |              |                 |             |                       |         |               |              |                  |                                   |             |                                |                                       |                        |
| Mediterranean     | Usual diet     | 6            | 677             | 48.9        | 2.71 (0.37, 5.12)     | No      | No            | No           | Undetected       | Mod                               | Serious     | Low                            | Yes                                   | Yes                    |
| Ornish            | Usual diet     |              |                 |             |                       |         |               |              |                  |                                   |             |                                |                                       |                        |
| Paleolithic       | Usual diet     |              |                 |             |                       |         |               |              |                  |                                   |             |                                |                                       |                        |
| Portfolio         | Usual diet     |              |                 |             |                       |         |               |              |                  |                                   |             |                                |                                       |                        |
| Rosemary Conley   | Usual diet     | 1            | 82              | NA          | 1.70 (-4.74, 8.14)    | Serious | No            | No           | Undetected       | Mod                               | V serious   | V low                          | NA                                    | NA                     |
| The Biggest Loser | Usual diet     | 1            | 260             | NA          | 3.18 (0.79, 5.58)     | No      | No            | No           | Undetected       | High                              | Serious     | Mod                            | NA                                    | NA                     |
| Volumetrics       | Usual diet     |              |                 |             |                       |         |               |              |                  |                                   |             |                                |                                       |                        |
| Weight Watchers   | Usual diet     | 3            | 588             | 0.0         | 2.48 (-1.35, 6.27)    | Serious | No            | No           | Undetected       | Mod                               | Serious     | Low                            | No                                    | Yes                    |
| Zone              | Usual diet     |              |                 |             |                       |         |               |              |                  |                                   |             |                                |                                       |                        |
| Low fat           | Dietary advice | 1            | 98              | NA          | 9.15 (5.11, 13.20)    | Serious | No            | No           | Undetected       | Mod                               | Serious     | Low                            | No                                    | Yes                    |
| Atkins            | Dietary advice |              |                 |             |                       |         |               |              |                  |                                   |             |                                |                                       |                        |
| DASH              | Dietary advice | 2            | 598             | 0.0         | 2.75 (-1.23, 6.96)    | No      | No            | No           | Undetected       | High                              | Serious     | Mod                            | No                                    | Yes                    |
| Jenny Craig       | Dietary advice |              |                 |             |                       |         |               |              |                  |                                   |             |                                |                                       |                        |

|                   |                |    |      |      |                     |         |    |         |            |      |           |       |     |     |
|-------------------|----------------|----|------|------|---------------------|---------|----|---------|------------|------|-----------|-------|-----|-----|
| Mediterranean     | Dietary advice | 2  | 217  | 0.0  | 1.36 (-3.82, 6.55)  | No      | No | No      | Undetected | High | Serious   | Mod   | No  | Yes |
| Ornish            | Dietary advice | 1  | 93   | NA   | 0.89 (-6.16, 7.94)  | No      | No | Serious | Undetected | Mod  | V serious | V low | No  | Yes |
| Paleolithic       | Dietary advice |    |      |      |                     |         |    |         |            |      |           |       |     |     |
| Portfolio         | Dietary advice |    |      |      |                     |         |    |         |            |      |           |       |     |     |
| Rosemary Conley   | Dietary advice |    |      |      |                     |         |    |         |            |      |           |       |     |     |
| The Biggest Loser | Dietary advice |    |      |      |                     |         |    |         |            |      |           |       |     |     |
| Volumetrics       | Dietary advice |    |      |      |                     |         |    |         |            |      |           |       |     |     |
| Weight Watchers   | Dietary advice | 3  | 1748 | 97.2 | 1.79 (-0.70, 4.46)  | No      | No | No      | Undetected | High | Serious   | Mod   | Yes | No  |
| Zone              | Dietary advice | 1  | 24   | NA   | 2.01 (-2.25, 6.27)  | No      | No | No      | Undetected | High | V serious | Low   | No  | Yes |
| Atkins            | Low fat        | 28 | 2572 | 0.0  | 1.19 (-0.13, 2.58)  | No      | No | No      | Undetected | High | Serious   | Mod   | Yes | No  |
| DASH              | Low fat        | 3  | 655  | 41.1 | 2.25 (-0.74, 5.44)  | No      | No | No      | Undetected | High | Serious   | Mod   | Yes | Yes |
| Jenny Craig       | Low fat        | 1  | 212  | NA   | 3.91 (-0.53, 8.35)  | No      | No | No      | Undetected | High | Serious   | Mod   | NA  | NA  |
| Mediterranean     | Low fat        | 1  | 169  | NA   | -0.99 (-5.52, 3.53) | No      | No | No      | Undetected | High | Serious   | Mod   | No  | Yes |
| Ornish            | Low fat        | 1  | 138  | NA   | -2.61 (-5.91, 0.70) | No      | No | No      | Undetected | High | Serious   | Mod   | NA  | NA  |
| Paleolithic       | Low fat        | 1  | 61   | NA   | 10.70 (4.95, 16.40) | No      | No | No      | Undetected | High | V serious | Low   | NA  | NA  |
| Portfolio         | Low fat        | 1  | 345  | NA   | 2.03 (-0.61, 4.68)  | No      | No | No      | Undetected | High | Serious   | Mod   | Yes | No  |
| Rosemary Conley   | Low fat        |    |      |      |                     |         |    |         |            |      |           |       |     |     |
| The Biggest Loser | Low fat        |    |      |      |                     |         |    |         |            |      |           |       |     |     |
| Volumetrics       | Low fat        | 1  | 71   | NA   | -1.01 (-5.60, 3.58) | Serious | No | No      | Undetected | Mod  | Serious   | Low   | NA  | NA  |
| Weight Watchers   | Low fat        |    |      |      |                     |         |    |         |            |      |           |       |     |     |
| Zone              | Low fat        | 6  | 462  | 0.0  | -0.03 (-2.88, 2.84) | No      | No | No      | Undetected | High | No        | High  | Yes | No  |

|                   |             |   |     |     |                     |         |    |         |            |      |           |       |     |     |
|-------------------|-------------|---|-----|-----|---------------------|---------|----|---------|------------|------|-----------|-------|-----|-----|
| DASH              | Atkins      |   |     |     |                     |         |    |         |            |      |           |       |     |     |
| Jenny Craig       | Atkins      |   |     |     |                     |         |    |         |            |      |           |       |     |     |
| Mediterranean     | Atkins      |   |     |     |                     |         |    |         |            |      |           |       |     |     |
| Ornish            | Atkins      | 2 | 179 | 0.0 | -4.90 (-9.91, 0.12) | No      | No | No      | Undetected | High | Serious   | Mod   | Yes | No  |
| Paleolithic       | Atkins      |   |     |     |                     |         |    |         |            |      |           |       |     |     |
| Portfolio         | Atkins      |   |     |     |                     |         |    |         |            |      |           |       |     |     |
| Rosemary Conley   | Atkins      | 1 | 82  | NA  | -2.70 (-9.10, 3.69) | Serious | No | No      | Undetected | Mod  | V serious | V low | NA  | NA  |
| The Biggest Loser | Atkins      |   |     |     |                     |         |    |         |            |      |           |       |     |     |
| Volumetrics       | Atkins      |   |     |     |                     |         |    |         |            |      |           |       |     |     |
| Weight Watchers   | Atkins      | 2 | 139 | 0.0 | -2.12 (-8.66, 4.49) | No      | No | No      | Undetected | High | Serious   | Mod   | No  | Yes |
| Zone              | Atkins      | 3 | 260 | 0.0 | -2.10 (-6.65, 2.53) | No      | No | No      | Undetected | High | Serious   | Mod   | No  | Yes |
| Jenny Craig       | DASH        |   |     |     |                     |         |    |         |            |      |           |       |     |     |
| Mediterranean     | DASH        | 1 | 95  | NA  | 2.99 (-3.59, 9.56)  | No      | No | Serious | Undetected | Mod  | V serious | V low | No  | Yes |
| Ornish            | DASH        |   |     |     |                     |         |    |         |            |      |           |       |     |     |
| Paleolithic       | DASH        |   |     |     |                     |         |    |         |            |      |           |       |     |     |
| Portfolio         | DASH        |   |     |     |                     |         |    |         |            |      |           |       |     |     |
| Rosemary Conley   | DASH        |   |     |     |                     |         |    |         |            |      |           |       |     |     |
| The Biggest Loser | DASH        |   |     |     |                     |         |    |         |            |      |           |       |     |     |
| Volumetrics       | DASH        |   |     |     |                     |         |    |         |            |      |           |       |     |     |
| Weight Watchers   | DASH        |   |     |     |                     |         |    |         |            |      |           |       |     |     |
| Zone              | DASH        |   |     |     |                     |         |    |         |            |      |           |       |     |     |
| Mediterranean     | Jenny Craig |   |     |     |                     |         |    |         |            |      |           |       |     |     |
| Ornish            | Jenny Craig |   |     |     |                     |         |    |         |            |      |           |       |     |     |
| Paleolithic       | Jenny Craig |   |     |     |                     |         |    |         |            |      |           |       |     |     |

|                   |               |   |     |     |                     |    |    |    |            |      |           |     |     |     |  |
|-------------------|---------------|---|-----|-----|---------------------|----|----|----|------------|------|-----------|-----|-----|-----|--|
| Portfolio         | Jenny Craig   |   |     |     |                     |    |    |    |            |      |           |     |     |     |  |
| Rosemary Conley   | Jenny Craig   |   |     |     |                     |    |    |    |            |      |           |     |     |     |  |
| The Biggest Loser | Jenny Craig   |   |     |     |                     |    |    |    |            |      |           |     |     |     |  |
| Volumetrics       | Jenny Craig   |   |     |     |                     |    |    |    |            |      |           |     |     |     |  |
| Weight Watchers   | Jenny Craig   |   |     |     |                     |    |    |    |            |      |           |     |     |     |  |
| Zone              | Jenny Craig   |   |     |     |                     |    |    |    |            |      |           |     |     |     |  |
| Ornish            | Mediterranean |   |     |     |                     |    |    |    |            |      |           |     |     |     |  |
| Paleolithic       | Mediterranean |   |     |     |                     |    |    |    |            |      |           |     |     |     |  |
| Portfolio         | Mediterranean |   |     |     |                     |    |    |    |            |      |           |     |     |     |  |
| Rosemary Conley   | Mediterranean |   |     |     |                     |    |    |    |            |      |           |     |     |     |  |
| The Biggest Loser | Mediterranean |   |     |     |                     |    |    |    |            |      |           |     |     |     |  |
| Volumetrics       | Mediterranean |   |     |     |                     |    |    |    |            |      |           |     |     |     |  |
| Weight Watchers   | Mediterranean |   |     |     |                     |    |    |    |            |      |           |     |     |     |  |
| Zone              | Mediterranean |   |     |     |                     |    |    |    |            |      |           |     |     |     |  |
| Paleolithic       | Ornish        |   |     |     |                     |    |    |    |            |      |           |     |     |     |  |
| Portfolio         | Ornish        |   |     |     |                     |    |    |    |            |      |           |     |     |     |  |
| Rosemary Conley   | Ornish        |   |     |     |                     |    |    |    |            |      |           |     |     |     |  |
| The Biggest Loser | Ornish        |   |     |     |                     |    |    |    |            |      |           |     |     |     |  |
| Volumetrics       | Ornish        |   |     |     |                     |    |    |    |            |      |           |     |     |     |  |
| Weight Watchers   | Ornish        | 1 | 51  | NA  | 5.22 (-5.44, 15.90) | No | No | No | Undetected | High | V serious | Low | No  | Yes |  |
| Zone              | Ornish        | 2 | 185 | 0.0 | 2.31 (-2.51, 7.24)  | No | No | No | Undetected | High | Serious   | Mod | Yes | No  |  |
| Portfolio         | Paleolithic   |   |     |     |                     |    |    |    |            |      |           |     |     |     |  |
| Rosemary Conley   | Paleolithic   |   |     |     |                     |    |    |    |            |      |           |     |     |     |  |

|                   |                   |   |    |    |                       |         |    |    |            |      |           |       |    |     |  |
|-------------------|-------------------|---|----|----|-----------------------|---------|----|----|------------|------|-----------|-------|----|-----|--|
| The Biggest Loser | Paleolithic       |   |    |    |                       |         |    |    |            |      |           |       |    |     |  |
| Volumetrics       | Paleolithic       |   |    |    |                       |         |    |    |            |      |           |       |    |     |  |
| Weight Watchers   | Paleolithic       |   |    |    |                       |         |    |    |            |      |           |       |    |     |  |
| Zone              | Paleolithic       |   |    |    |                       |         |    |    |            |      |           |       |    |     |  |
| Rosemary Conley   | Portfolio         |   |    |    |                       |         |    |    |            |      |           |       |    |     |  |
| The Biggest Loser | Portfolio         |   |    |    |                       |         |    |    |            |      |           |       |    |     |  |
| Volumetrics       | Portfolio         |   |    |    |                       |         |    |    |            |      |           |       |    |     |  |
| Weight Watchers   | Portfolio         |   |    |    |                       |         |    |    |            |      |           |       |    |     |  |
| Zone              | Portfolio         |   |    |    |                       |         |    |    |            |      |           |       |    |     |  |
| The Biggest Loser | Rosemary Conley   |   |    |    |                       |         |    |    |            |      |           |       |    |     |  |
| Volumetrics       | Rosemary Conley   |   |    |    |                       |         |    |    |            |      |           |       |    |     |  |
| Weight Watchers   | Rosemary Conley   | 1 | 89 | NA | -0.40 (-6.28, 5.48)   | Serious | No | No | Undetected | Mod  | V serious | V low | NA | NA  |  |
| Zone              | Rosemary Conley   |   |    |    |                       |         |    |    |            |      |           |       |    |     |  |
| Volumetrics       | The Biggest Loser |   |    |    |                       |         |    |    |            |      |           |       |    |     |  |
| Weight Watchers   | The Biggest Loser |   |    |    |                       |         |    |    |            |      |           |       |    |     |  |
| Zone              | The Biggest Loser |   |    |    |                       |         |    |    |            |      |           |       |    |     |  |
| Weight Watchers   | Volumetrics       |   |    |    |                       |         |    |    |            |      |           |       |    |     |  |
| Zone              | Volumetrics       |   |    |    |                       |         |    |    |            |      |           |       |    |     |  |
| Zone              | Weight Watchers   | 1 | 56 | NA | -0.32 (-14.10, 13.40) | No      | No | No | Undetected | High | V serious | Low   | No | Yes |  |

Table S30 continued: GRADE assessment for 6-month SBP reduction in individual popular diets NMA

| Comparison groups |                | Indirect evidence   |                                           |                      |                |                                     |             |                                  | Network evidence    |                      |                                                          |             |                 |                      |
|-------------------|----------------|---------------------|-------------------------------------------|----------------------|----------------|-------------------------------------|-------------|----------------------------------|---------------------|----------------------|----------------------------------------------------------|-------------|-----------------|----------------------|
| Arm 1             | Arm 2 (Ref)    | MD (95%CrI)         | First order loop of the most contribution | Low est of C1 and C2 | Intransitivity | Indirect rating without imprecision | Imprecision | Indirect rating with imprecision | MD (95%CrI)         | Incoherence, P-value | Higher rating of direct and indirect without imprecision | Incoherence | NMA Imprecision | Final network rating |
| Dietary advice    | Usual diet     | 1.25 (-1.13, 3.51)  | Weight_Watchers                           | Mod                  | No             | Mod                                 | Serious     | Low                              | 0.58 (-1.85, 2.94)  | 0.694                | Mod                                                      | No          | Serious         | Low                  |
| Low fat           | Usual diet     | 2.51 (-0.32, 5.35)  | DASH                                      | Low                  | No             | Low                                 | Serious     | V low                            | 3.95 (1.81, 6.10)   | 0.273                | High                                                     | No          | Serious         | Mod                  |
| Atkins            | Usual diet     | 5.24 (2.66, 7.89)   | Low fat                                   | High                 | No             | High                                | Serious     | Mod                              | 5.14 (2.78, 7.57)   | 0.803                | High                                                     | No          | Serious         | Mod                  |
| DASH              | Usual diet     | 4.76 (1.16, 8.51)   | Low fat                                   | High                 | No             | High                                | Serious     | Mod                              | 4.68 (2.83, 6.64)   | 0.974                | High                                                     | No          | Serious         | Mod                  |
| Jenny Craig       | Usual diet     | 7.86 (1.52, 14.21)  | Low fat                                   | High                 | Serious        | Mod                                 | Serious     | Low                              | 7.86 (1.52, 14.21)  | NA                   | Mod                                                      | No          | Serious         | Low                  |
| Mediterranean     | Usual diet     | 3.64 (-0.37, 7.64)  | Low fat                                   | High                 | No             | High                                | Serious     | Mod                              | 2.94 (0.95, 5.02)   | 0.692                | High                                                     | No          | Serious         | Mod                  |
| Ornish            | Usual diet     | 0.69 (-3.06, 4.35)  | Low fat                                   | High                 | No             | High                                | Serious     | Mod                              | 0.69 (-3.06, 4.35)  | NA                   | High                                                     | No          | Serious         | Mod                  |
| Paleolithic       | Usual diet     | 14.56 (7.34, 21.85) | Low fat                                   | High                 | No             | High                                | Serious     | Mod                              | 14.56 (7.34, 21.85) | NA                   | High                                                     | No          | Serious         | Mod                  |
| Portfolio         | Usual diet     | 5.97 (0.74, 11.18)  | Low fat                                   | High                 | No             | High                                | Serious     | Mod                              | 5.97 (0.74, 11.18)  | NA                   | High                                                     | No          | Serious         | Mod                  |
| Rosemary Conley   | Usual diet     | NA                  |                                           |                      |                |                                     |             |                                  | 2.39 (-2.62, 7.39)  | NA                   | Mod                                                      | No          | V serious       | V low                |
| The Biggest Loser | Usual diet     | NA                  |                                           |                      |                |                                     |             |                                  | 3.17 (-1.46, 7.81)  | NA                   | High                                                     | No          | Serious         | Mod                  |
| Volumetrics       | Usual diet     | 2.93 (-3.46, 9.29)  | Low fat                                   | Mod                  | No             | Mod                                 | Serious     | Low                              | 2.93 (-3.46, 9.29)  | NA                   | Mod                                                      | No          | Serious         | Low                  |
| Weight Watchers   | Usual diet     | 2.80 (-0.84, 6.61)  | Dietary advice                            | Mod                  | No             | Mod                                 | Serious     | Low                              | 2.80 (-0.84, 6.61)  | NA                   | Mod                                                      | No          | Serious         | Low                  |
| Zone              | Usual diet     | 3.46 (0.53, 6.44)   | Low fat                                   | High                 | No             | High                                | Serious     | Mod                              | 3.46 (0.53, 6.44)   | NA                   | High                                                     | No          | Serious         | Mod                  |
| Low fat           | Dietary advice | 1.97 (-0.47, 4.47)  | DASH                                      | High                 | No             | High                                | Serious     | Mod                              | 3.37 (0.97, 5.85)   | 0.016                | High                                                     | Serious     | Serious         | Low                  |



|                   |                |                     |                 |      |         |      |         |       |                      |       |      |    |         |       |
|-------------------|----------------|---------------------|-----------------|------|---------|------|---------|-------|----------------------|-------|------|----|---------|-------|
| Atkins            | Dietary advice | 4.54 (1.99, 7.19)   | Low fat         | Mod  | No      | Mod  | Serious | Low   | 4.54 (1.99, 7.19)    | NA    | Mod  | No | Serious | Low   |
| DASH              | Dietary advice | 4.97 (1.90, 8.10)   | Low fat         | Mod  | No      | Mod  | Serious | Low   | 4.09 (1.73, 6.65)    | 0.380 | High | No | Serious | Mod   |
| Jenny Craig       | Dietary advice | 7.29 (0.88, 13.72)  | Low fat         | Mod  | Serious | Low  | Serious | V low | 7.29 (0.88, 13.72)   | NA    | Low  | No | Serious | V low |
| Mediterranean     | Dietary advice | 2.77 (-0.45, 6.22)  | Usual diet      | Mod  | No      | Mod  | Serious | Low   | 2.36 (-0.32, 5.16)   | 0.650 | High | No | Serious | Mod   |
| Ornish            | Dietary advice | -0.07 (-4.18, 4.06) | Low fat         | Mod  | No      | Mod  | Serious | Low   | 0.13 (-3.52, 3.76)   | 0.841 | Mod  | No | Serious | Low   |
| Paleolithic       | Dietary advice | 13.99 (6.71, 21.37) | Low fat         | Mod  | No      | Mod  | Serious | Low   | 13.99 (6.71, 21.37)  | NA    | Mod  | No | Serious | Low   |
| Portfolio         | Dietary advice | 5.39 (0.07, 10.75)  | Low fat         | Mod  | No      | Mod  | Serious | Low   | 5.39 (0.07, 10.75)   | NA    | Mod  | No | Serious | Low   |
| Rosemary Conley   | Dietary advice | 1.81 (-3.33, 6.99)  | Weight Watchers | Mod  | No      | Mod  | Serious | Low   | 1.81 (-3.33, 6.99)   | NA    | Mod  | No | Serious | Low   |
| The Biggest Loser | Dietary advice | 2.60 (-2.58, 7.84)  | Usual diet      | Mod  | Serious | Low  | Serious | V low | 2.60 (-2.58, 7.84)   | NA    | Low  | No | Serious | V low |
| Volumetrics       | Dietary advice | 2.34 (-4.13, 8.85)  | Low fat         | Mod  | No      | Mod  | Serious | Low   | 2.34 (-4.13, 8.85)   | NA    | Mod  | No | Serious | Low   |
| Weight Watchers   | Dietary advice | 2.42 (-1.59, 6.51)  |                 |      |         |      |         |       | 1.95 (-0.10, 4.18)   | 0.807 | High | No | Serious | Mod   |
| Zone              | Dietary advice | 3.24 (-0.20, 6.79)  | Low fat         | Mod  | No      | Mod  | Serious | Low   | 2.90 (-0.03, 5.93)   | 0.719 | High | No | Serious | Mod   |
| Atkins            | Low fat        | 0.78 (-4.20, 5.76)  | Zone            | High | No      | High | Serious | Mod   | 1.19 (-0.06, 2.50)   | 0.860 | High | No | Serious | Mod   |
| DASH              | Low fat        | -1.10 (-4.33, 2.32) | Usual diet      | Low  | No      | Low  | Serious | V low | 0.73 (-1.43, 3.01)   | 0.148 | High | No | Serious | Mod   |
| Jenny Craig       | Low fat        | NA                  |                 |      |         |      |         |       | 3.93 (-2.03, 9.86)   | NA    | High | No | Serious | Mod   |
| Mediterranean     | Low fat        | -0.99 (-3.91, 2.02) | Usual diet      | Mod  | No      | Mod  | Serious | Low   | -1.00 (-3.61, 1.65)  | 1.000 | High | No | Serious | Mod   |
| Ornish            | Low fat        | NA                  |                 |      |         |      |         |       | -3.24 (-6.49, -0.01) | 0.669 | High | No | Serious | Mod   |
| Paleolithic       | Low fat        | NA                  |                 |      |         |      |         |       | 10.63 (3.72, 17.57)  | NA    | High | No | Serious | Mod   |
| Portfolio         | Low fat        | 2.03 (-2.74, 6.77)  |                 |      |         |      |         |       | 2.03 (-2.74, 6.77)   | NA    | High | No | Serious | Mod   |
| Rosemary Conley   | Low fat        | -1.55 (-6.59, 3.49) | Atkins          | Mod  | No      | Mod  | Serious | Low   | -1.55 (-6.59, 3.49)  | NA    | Mod  | No | Serious | Low   |
| The Biggest Loser | Low fat        | -0.77 (-5.87, 4.35) | Usual diet      | High | Serious | Mod  | Serious | Low   | -0.77 (-5.87, 4.35)  | NA    | Mod  | No | Serious | Low   |

|                   |         |                      |            |      |         |       |         |       |  |                      |       |       |    |           |       |
|-------------------|---------|----------------------|------------|------|---------|-------|---------|-------|--|----------------------|-------|-------|----|-----------|-------|
| Volumetrics       | Low fat | NA                   |            |      |         |       |         |       |  | -1.01 (-7.04, 4.99)  | NA    | Mod   | No | Serious   | Low   |
| Weight Watchers   | Low fat | -1.39 (-4.02, 1.33)  | Atkins     | High | No      | High  | Serious | Mod   |  | -1.39 (-4.02, 1.33)  | NA    | High  | No | Serious   | Mod   |
| Zone              | Low fat | -1.04 (-6.24, 4.19)  |            |      |         |       |         |       |  | -0.47 (-2.77, 1.86)  | 0.734 | High  | No | No        | High  |
| DASH              | Atkins  | -0.45 (-2.87, 2.04)  | Low fat    | High | No      | High  | No      | High  |  | -0.45 (-2.87, 2.04)  | NA    | High  | No | No        | High  |
| Jenny Craig       | Atkins  | 2.74 (-3.36, 8.77)   | Low fat    | High | Serious | Mod   | Serious | Low   |  | 2.74 (-3.36, 8.77)   | NA    | Mod   | No | Serious   | Low   |
| Mediterranean     | Atkins  | -2.18 (-4.98, 0.65)  | Low fat    | High | No      | High  | Serious | Mod   |  | -2.18 (-4.98, 0.65)  | NA    | High  | No | Serious   | Mod   |
| Ornish            | Atkins  | -3.73 (-12.40, 4.84) |            |      |         |       |         |       |  | -4.43 (-7.76, -1.20) | 0.811 | High  | No | Serious   | Mod   |
| Paleolithic       | Atkins  | 9.45 (2.42, 16.48)   | Low fat    | High | No      | High  | Serious | Mod   |  | 9.45 (2.42, 16.48)   | NA    | High  | No | Serious   | Mod   |
| Portfolio         | Atkins  | 0.85 (-4.13, 5.72)   | Low fat    | High | Serious | Mod   | Serious | Low   |  | 0.85 (-4.13, 5.72)   | NA    | Mod   | No | Serious   | Low   |
| Rosemary Conley   | Atkins  | NA                   |            |      |         |       |         |       |  | -2.74 (-7.80, 2.31)  | NA    | Mod   | No | V serious | V low |
| The Biggest Loser | Atkins  | -1.95 (-7.18, 3.25)  | Usual diet | Mod  | Serious | Low   | Serious | V low |  | -1.95 (-7.18, 3.25)  | NA    | Low   | No | Serious   | V low |
| Volumetrics       | Atkins  | -2.20 (-8.39, 3.92)  | Low fat    | Mod  | No      | Mod   | Serious | Low   |  | -2.20 (-8.39, 3.92)  | NA    | Mod   | No | Serious   | Low   |
| Weight Watchers   | Atkins  | -2.86 (-6.39, 0.65)  | Usual diet | Mod  | No      | Mod   | Serious | Low   |  | -2.60 (-5.37, 0.19)  | 0.812 | High  | No | Serious   | Mod   |
| Zone              | Atkins  | -1.48 (-5.13, 2.14)  | Low fat    | High | No      | High  | Serious | Mod   |  | -1.66 (-4.13, 0.80)  | 0.840 | High  | No | Serious   | Mod   |
| Jenny Craig       | DASH    | 3.18 (-3.20, 9.50)   | Low fat    | High | No      | High  | Serious | Mod   |  | 3.18 (-3.20, 9.50)   | NA    | High  | No | Serious   | Mod   |
| Mediterranean     | DASH    | -2.31 (-5.04, 0.34)  | Usual diet | Low  | No      | Low   | Serious | V low |  | -1.74 (-4.28, 0.77)  | 0.200 | Mod   | No | Serious   | Low   |
| Ornish            | DASH    | -3.98 (-7.85, -0.32) | Low fat    | High | No      | High  | Serious | Mod   |  | -3.98 (-7.85, -0.32) | NA    | High  | No | Serious   | Mod   |
| Paleolithic       | DASH    | 9.89 (2.60, 17.14)   | Low fat    | High | No      | High  | Serious | Mod   |  | 9.89 (2.60, 17.14)   | NA    | High  | No | Serious   | Mod   |
| Portfolio         | DASH    | 1.30 (-4.02, 6.46)   | Low fat    | High | No      | High  | Serious | Mod   |  | 1.30 (-4.02, 6.46)   | NA    | High  | No | Serious   | Mod   |
| Rosemary Conley   | DASH    | -2.29 (-7.51, 2.83)  | Usual diet | Low  | No      | Low   | Serious | V low |  | -2.29 (-7.51, 2.83)  | NA    | Low   | No | Serious   | V low |
| The Biggest Loser | DASH    | -1.49 (-6.58, 3.45)  | Usual diet | Low  | Serious | V low | Serious | V low |  | -1.49 (-6.58, 3.45)  | NA    | V low | No | Serious   | V low |

|                   |               |                       |                     |      |         |      |         |       |                       |    |      |    |         |       |
|-------------------|---------------|-----------------------|---------------------|------|---------|------|---------|-------|-----------------------|----|------|----|---------|-------|
| Volumetrics       | DASH          | -1.76 (-8.19, 4.61)   | Low fat             | Mod  | No      | Mod  | Serious | Low   | -1.76 (-8.19, 4.61)   | NA | Mod  | No | Serious | Low   |
| Weight Watchers   | DASH          | -2.13 (-4.87, 0.57)   | Usual diet          | Low  | No      | Low  | Serious | V low | -2.13 (-4.87, 0.57)   | NA | Low  | No | Serious | V low |
| Zone              | DASH          | -1.21 (-4.26, 1.78)   | Low fat             | High | No      | High | Serious | Mod   | -1.21 (-4.26, 1.78)   | NA | High | No | Serious | Mod   |
| Mediterranean     | Jenny Craig   | -4.92 (-11.40, 1.62)  | Low fat             | High | Serious | Mod  | Serious | Low   | -4.92 (-11.40, 1.62)  | NA | Mod  | No | Serious | Low   |
| Ornish            | Jenny Craig   | -7.18 (-13.99, -0.44) | Low fat             | High | Serious | Mod  | Serious | Low   | -7.18 (-13.99, -0.44) | NA | Mod  | No | Serious | Low   |
| Paleolithic       | Jenny Craig   | 6.71 (-2.42, 15.88)   | Low fat             | High | Serious | Mod  | Serious | Low   | 6.71 (-2.42, 15.88)   | NA | Mod  | No | Serious | Low   |
| Portfolio         | Jenny Craig   | -1.91 (-9.50, 5.72)   | Low fat             | High | Serious | Mod  | Serious | Low   | -1.91 (-9.50, 5.72)   | NA | Mod  | No | Serious | Low   |
| Rosemary Conley   | Jenny Craig   | -5.48 (-13.30, 2.36)  | Low fat, Atkins     | Mod  | Serious | Low  | Serious | V low | -5.48 (-13.30, 2.36)  | NA | Low  | No | Serious | V low |
| The Biggest Loser | Jenny Craig   | -4.70 (-12.54, 3.18)  | Low fat, Usual diet | High | Serious | Mod  | Serious | Low   | -4.70 (-12.54, 3.18)  | NA | Mod  | No | Serious | Low   |
| Volumetrics       | Jenny Craig   | -4.94 (-13.40, 3.53)  | Low fat             | Mod  | Serious | Low  | Serious | V low | -4.94 (-13.40, 3.53)  | NA | Low  | No | Serious | V low |
| Weight Watchers   | Jenny Craig   | -5.32 (-11.80, 1.23)  | Low fat, Atkins     | Mod  | Serious | Low  | Serious | V low | -5.32 (-11.80, 1.23)  | NA | Low  | No | Serious | V low |
| Zone              | Jenny Craig   | -4.40 (-10.76, 2.00)  | Low fat             | High | Serious | Mod  | Serious | Low   | -4.40 (-10.76, 2.00)  | NA | Mod  | No | Serious | Low   |
| Ornish            | Mediterranean | -2.26 (-6.34, 1.66)   | Low fat, Usual diet | Mod  | No      | Mod  | Serious | Low   | -2.26 (-6.34, 1.66)   | NA | Mod  | No | Serious | Low   |
| Paleolithic       | Mediterranean | 11.62 (4.22, 19.02)   | Low fat             | High | No      | High | Serious | Mod   | 11.62 (4.22, 19.02)   | NA | High | No | Serious | Mod   |
| Portfolio         | Mediterranean | 3.02 (-2.46, 8.40)    | Low fat             | High | No      | High | Serious | Mod   | 3.02 (-2.46, 8.40)    | NA | High | No | Serious | Mod   |
| Rosemary Conley   | Mediterranean | -0.56 (-5.89, 4.69)   | Usual diet          | Mod  | No      | Mod  | Serious | Low   | -0.56 (-5.89, 4.69)   | NA | Mod  | No | Serious | Low   |
| The Biggest Loser | Mediterranean | 0.23 (-4.88, 5.26)    | Usual diet          | Mod  | Serious | Low  | Serious | V low | 0.23 (-4.88, 5.26)    | NA | Low  | No | Serious | V low |
| Volumetrics       | Mediterranean | -0.02 (-6.64, 6.49)   | Low fat             | Mod  | No      | Mod  | Serious | Low   | -0.02 (-6.64, 6.49)   | NA | Mod  | No | Serious | Low   |
| Weight Watchers   | Mediterranean | -0.40 (-3.37, 2.57)   | Usual diet          | Mod  | No      | Mod  | Serious | Low   | -0.40 (-3.37, 2.57)   | NA | Mod  | No | Serious | Low   |
| Zone              | Mediterranean | 0.51 (-2.79, 3.82)    | Low fat             | High | No      | High | Serious | Mod   | 0.51 (-2.79, 3.82)    | NA | High | No | Serious | Low   |
| Paleolithic       | Ornish        | 13.90 (6.26, 21.54)   | Low fat             | High | No      | High | Serious | Mod   | 13.90 (6.26, 21.54)   | NA | High | No | Serious | Mod   |

|                   |                 |                        |                     |      |         |      |         |       |                        |       |      |    |           |       |
|-------------------|-----------------|------------------------|---------------------|------|---------|------|---------|-------|------------------------|-------|------|----|-----------|-------|
| Portfolio         | Ornish          | 5.28 (-0.47, 11.07)    | Low fat             | High | No      | High | Serious | Mod   | 5.28 (-0.47, 11.07)    | NA    | High | No | Serious   | Mod   |
| Rosemary Conley   | Ornish          | 1.71 (-4.11, 7.56)     | Atkins              | Mod  | No      | Mod  | Serious | Low   | 1.71 (-4.11, 7.56)     | NA    | Mod  | No | Serious   | Low   |
| The Biggest Loser | Ornish          | 2.48 (-3.40, 8.44)     | Low fat, Usual diet | High | Serious | Mod  | Serious | Low   | 2.48 (-3.40, 8.44)     | NA    | Mod  | No | Serious   | Low   |
| Volumetrics       | Ornish          | 2.25 (-4.60, 9.06)     | Low fat             | Mod  | No      | Mod  | Serious | Low   | 2.25 (-4.60, 9.06)     | NA    | Mod  | No | Serious   | Low   |
| Weight Watchers   | Ornish          | 1.06 (-3.26, 5.42)     | Atkins              | High | No      | High | Serious | Mod   | 1.83 (-1.93, 5.72)     | 0.402 | High | No | Serious   | Mod   |
| Zone              | Ornish          | 2.33 (-6.57, 11.20)    |                     |      |         |      |         |       | 2.78 (-0.69, 6.30)     | 0.970 | High | No | Serious   | Mod   |
| Portfolio         | Paleolithic     | -8.61 (-17.02, -0.22)  | Low fat             | High | No      | High | Serious | Mod   | -8.61 (-17.02, -0.22)  | NA    | High | No | Serious   | Low   |
| Rosemary Conley   | Paleolithic     | -12.20 (-20.76, -3.59) | Low fat, Atkins     | Mod  | No      | Mod  | Serious | Low   | -12.20 (-20.76, -3.59) | NA    | Mod  | No | Serious   | Low   |
| The Biggest Loser | Paleolithic     | -11.40 (-20.01, -2.83) | Low fat, Usual diet | High | Serious | Mod  | Serious | Low   | -11.40 (-20.01, -2.83) | NA    | Mod  | No | Serious   | Low   |
| Volumetrics       | Paleolithic     | -11.65 (-20.85, -2.51) | Low fat             | Mod  | No      | Mod  | Serious | Low   | -11.65 (-20.85, -2.51) | NA    | Mod  | No | Serious   | Low   |
| Weight Watchers   | Paleolithic     | -12.02 (-19.44, -4.61) | Low fat, Atkins     | Mod  | No      | Mod  | Serious | Low   | -12.02 (-19.44, -4.61) | NA    | Mod  | No | Serious   | Low   |
| Zone              | Paleolithic     | -11.11 (-18.40, -3.82) | Low fat             | High | No      | High | Serious | Mod   | -11.11 (-18.40, -3.82) | NA    | High | No | Serious   | Mod   |
| Rosemary Conley   | Portfolio       | -3.59 (-10.52, 3.40)   | Low fat, Atkins     | Mod  | No      | Mod  | Serious | Low   | -3.59 (-10.52, 3.40)   | NA    | Mod  | No | Serious   | Low   |
| The Biggest Loser | Portfolio       | -2.80 (-9.76, 4.20)    | Low fat, Usual diet | High | Serious | Mod  | Serious | Low   | -2.80 (-9.76, 4.20)    | NA    | Mod  | No | Serious   | Low   |
| Volumetrics       | Portfolio       | -3.04 (-10.69, 4.60)   | Low fat             | Mod  | No      | Mod  | Serious | Low   | -3.04 (-10.69, 4.60)   | NA    | Mod  | No | Serious   | Low   |
| Weight Watchers   | Portfolio       | -3.43 (-8.82, 2.10)    | Low fat, Atkins     | Mod  | Serious | Low  | Serious | V low | -3.43 (-8.82, 2.10)    | NA    | Low  | No | Serious   | V low |
| Zone              | Portfolio       | -2.51 (-7.76, 2.80)    | Low fat             | High | Serious | Mod  | Serious | Low   | -2.51 (-7.76, 2.80)    | NA    | Mod  | No | Serious   | Low   |
| The Biggest Loser | Rosemary Conley | 0.79 (-6.04, 7.62)     | Usual diet          | Mod  | No      | Mod  | Serious | Low   | 0.79 (-6.04, 7.62)     | NA    | Mod  | No | Serious   | Low   |
| Volumetrics       | Rosemary Conley | 0.54 (-7.34, 8.40)     | Low fat, Atkins     | Mod  | No      | Mod  | Serious | Low   | 0.54 (-7.34, 8.40)     | NA    | Mod  | No | Serious   | Low   |
| Weight Watchers   | Rosemary Conley | NA                     |                     |      |         |      |         |       | 0.16 (-4.86, 5.25)     | NA    | Mod  | No | V serious | V low |
| Zone              | Rosemary Conley | 1.08 (-4.34, 6.52)     | Atkins              | Mod  | No      | Mod  | Serious | Low   | 1.08 (-4.34, 6.52)     | NA    | Mod  | No | Serious   | Low   |

|                 |                   |                     |                     |      |         |      |         |       |  |                     |       |      |    |         |       |
|-----------------|-------------------|---------------------|---------------------|------|---------|------|---------|-------|--|---------------------|-------|------|----|---------|-------|
| Volumetrics     | The Biggest Loser | -0.24 (-8.12, 7.63) | Low fat, Usual diet | Mod  | Serious | Low  | Serious | V low |  | -0.24 (-8.12, 7.63) | NA    | Low  | No | Serious | V low |
| Weight Watchers | The Biggest Loser | -0.63 (-5.86, 4.68) | Usual diet          | Mod  | Serious | Low  | Serious | V low |  | -0.63 (-5.86, 4.68) | NA    | Low  | No | Serious | V low |
| Zone            | The Biggest Loser | 0.28 (-5.17, 5.80)  | Low fat, Usual diet | High | Serious | Mod  | Serious | Low   |  | 0.28 (-5.17, 5.80)  | NA    | Mod  | No | Serious | Low   |
| Weight Watchers | Volumetrics       | -0.38 (-6.92, 6.24) | Low fat, Atkins     | Mod  | No      | Mod  | Serious | Low   |  | -0.38 (-6.92, 6.24) | NA    | Mod  | No | Serious | Low   |
| Zone            | Volumetrics       | 0.54 (-5.87, 7.02)  | Low fat             | Mod  | No      | Mod  | Serious | Low   |  | 0.54 (-5.87, 7.02)  | NA    | Mod  | No | Serious | Low   |
| Zone            | Weight Watchers   | 1.20 (-2.24, 4.67)  | Dietary advice      | High | No      | High | Serious | Mod   |  | 0.94 (-2.27, 4.15)  | 0.774 | High | No | Serious | Mod   |

Table S31: GRADE assessment for 6-month DBP reduction in individual popular diets NMA

| Arm 1             | Arm 2 (Ref)    | No. of study | No. of patients | I-square, % | MD (95%CrI)         | RoB     | Inconsistency | Indirectness | Publication bias | Direct rating without imprecision | Imprecision | Direct rating with imprecision | Direct is more precise than indirect? | Need to rate indirect? |
|-------------------|----------------|--------------|-----------------|-------------|---------------------|---------|---------------|--------------|------------------|-----------------------------------|-------------|--------------------------------|---------------------------------------|------------------------|
| Dietary advice    | Usual diet     | 1            | 65              | NA          | 0.50 (-9.16, 10.20) | Serious | No            | No           | Undetected       | Mod                               | V serious   | V low                          | No                                    | Yes                    |
| Low fat           | Usual diet     | 4            | 723             | 0.0         | 2.47 (0.16, 4.87)   | No      | No            | No           | Undetected       | High                              | Serious     | Mod                            | No                                    | Yes                    |
| Atkins            | Usual diet     | 1            | 80              | NA          | 3.30 (-1.88, 8.49)  | Serious | No            | No           | Undetected       | Mod                               | Serious     | Low                            | No                                    | Yes                    |
| DASH              | Usual diet     | 8            | 1150            | 84.3        | 2.61 (1.04, 4.22)   | No      | Serious       | Serious      | Undetected       | Low                               | Serious     | V low                          | Yes                                   | Yes                    |
| Jenny Craig       | Usual diet     |              |                 |             |                     |         |               |              |                  |                                   |             |                                |                                       |                        |
| Mediterranean     | Usual diet     | 6            | 677             | 0.0         | 1.38 (-0.44, 3.20)  | No      | No            | No           | Undetected       | High                              | Serious     | Mod                            | Yes                                   | No                     |
| Ornish            | Usual diet     |              |                 |             |                     |         |               |              |                  |                                   |             |                                |                                       |                        |
| Paleolithic       | Usual diet     |              |                 |             |                     |         |               |              |                  |                                   |             |                                |                                       |                        |
| Portfolio         | Usual diet     |              |                 |             |                     |         |               |              |                  |                                   |             |                                |                                       |                        |
| Rosemary Conley   | Usual diet     | 1            | 82              | NA          | 2.00 (-1.76, 5.77)  | Serious | No            | No           | Undetected       | Mod                               | Serious     | Low                            | NA                                    | NA                     |
| The Biggest Loser | Usual diet     | 1            | 260             | NA          | 2.20 (0.55, 3.85)   | No      | No            | No           | Undetected       | High                              | Serious     | Mod                            | NA                                    | NA                     |
| Volumetrics       | Usual diet     |              |                 |             |                     |         |               |              |                  |                                   |             |                                |                                       |                        |
| Weight Watchers   | Usual diet     | 3            | 588             | 30.4        | 0.62 (-2.06, 3.41)  | Serious | No            | No           | Undetected       | Mod                               | Serious     | Low                            | No                                    | Yes                    |
| Zone              | Usual diet     |              |                 |             |                     |         |               |              |                  |                                   |             |                                |                                       |                        |
| Low fat           | Dietary advice | 1            | 98              | NA          | 4.20 (0.95, 7.44)   | Serious | No            | No           | Undetected       | Mod                               | Serious     | Low                            | No                                    | Yes                    |
| Atkins            | Dietary advice |              |                 |             |                     |         |               |              |                  |                                   |             |                                |                                       |                        |
| DASH              | Dietary advice | 2            | 598             | 70.4        | 1.62 (-1.35, 4.86)  | No      | No            | No           | Undetected       | High                              | Serious     | Mod                            | No                                    | Yes                    |
| Jenny Craig       | Dietary advice |              |                 |             |                     |         |               |              |                  |                                   |             |                                |                                       |                        |

|                   |                |    |      |      |                     |         |    |         |            |      |           |      |     |     |
|-------------------|----------------|----|------|------|---------------------|---------|----|---------|------------|------|-----------|------|-----|-----|
| Mediterranean     | Dietary advice | 2  | 217  | 0.0  | -0.56 (-4.52, 3.32) | No      | No | No      | Undetected | High | Serious   | Mod  | No  | Yes |
| Ornish            | Dietary advice | 1  | 93   | NA   | -0.28 (-4.87, 4.31) | No      | No | Serious | Undetected | Mod  | Serious   | Low  | No  | Yes |
| Paleolithic       | Dietary advice |    |      |      |                     |         |    |         |            |      |           |      |     |     |
| Portfolio         | Dietary advice |    |      |      |                     |         |    |         |            |      |           |      |     |     |
| Rosemary Conley   | Dietary advice |    |      |      |                     |         |    |         |            |      |           |      |     |     |
| The Biggest Loser | Dietary advice |    |      |      |                     |         |    |         |            |      |           |      |     |     |
| Volumetrics       | Dietary advice |    |      |      |                     |         |    |         |            |      |           |      |     |     |
| Weight Watchers   | Dietary advice | 3  | 1748 | 97.8 | 0.90 (-1.01, 2.87)  | No      | No | No      | Undetected | High | Serious   | Mod  | Yes | No  |
| Zone              | Dietary advice | 1  | 24   | NA   | 2.01 (-1.52, 5.54)  | No      | No | No      | Undetected | High | V serious | Low  | No  | Yes |
| Atkins            | Low fat        | 27 | 2493 | 9.8  | 1.03 (0.07, 2.00)   | No      | No | No      | Undetected | High | No        | High | Yes | No  |
| DASH              | Low fat        | 3  | 655  | 24.8 | 1.63 (-0.62, 3.98)  | No      | No | No      | Undetected | High | Serious   | Mod  | Yes | Yes |
| Jenny Craig       | Low fat        | 1  | 212  | NA   | 5.54 (2.45, 8.63)   | No      | No | No      | Undetected | High | No        | High | NA  | NA  |
| Mediterranean     | Low fat        | 1  | 169  | NA   | -2.00 (-6.49, 2.49) | No      | No | No      | Undetected | High | Serious   | Mod  | No  | Yes |
| Ornish            | Low fat        | 1  | 138  | NA   | -1.50 (-4.20, 1.21) | No      | No | No      | Undetected | High | Serious   | Mod  | Yes | No  |
| Paleolithic       | Low fat        | 1  | 61   | NA   | 1.61 (-2.04, 5.26)  | No      | No | No      | Undetected | High | V serious | Low  | NA  | NA  |
| Portfolio         | Low fat        | 1  | 345  | NA   | 1.75 (0.07, 3.42)   | No      | No | No      | Undetected | High | Serious   | Mod  | NA  | NA  |
| Rosemary Conley   | Low fat        |    |      |      |                     |         |    |         |            |      |           |      |     |     |
| The Biggest Loser | Low fat        |    |      |      |                     |         |    |         |            |      |           |      |     |     |
| Volumetrics       | Low fat        | 1  | 71   | NA   | -0.29 (-3.50, 2.92) | Serious | No | No      | Undetected | Mod  | Serious   | Low  | NA  | NA  |
| Weight Watchers   | Low fat        |    |      |      |                     |         |    |         |            |      |           |      |     |     |
| Zone              | ow fat         | 6  | 462  | 0.0  | 0.06 (-2.12, 2.25)  | No      | No | No      | Undetected | High | Serious   | Mod  | Yes | No  |
| DASH              | Atkins         |    |      |      |                     |         |    |         |            |      |           |      |     |     |

|                   |             |   |     |      |                     |         |    |         |            |      |         |     |     |     |
|-------------------|-------------|---|-----|------|---------------------|---------|----|---------|------------|------|---------|-----|-----|-----|
| Jenny Craig       | Atkins      |   |     |      |                     |         |    |         |            |      |         |     |     |     |
| Mediterranean     | Atkins      |   |     |      |                     |         |    |         |            |      |         |     |     |     |
| Ornish            | Atkins      | 2 | 179 | 29.0 | -3.45 (-7.33, 0.34) | No      | No | No      | Undetected | High | Serious | Mod | Yes | No  |
| Paleolithic       | Atkins      |   |     |      |                     |         |    |         |            |      |         |     |     |     |
| Portfolio         | Atkins      |   |     |      |                     |         |    |         |            |      |         |     |     |     |
| Rosemary Conley   | Atkins      | 1 | 82  | NA   | -1.30 (-5.43, 2.83) | Serious | No | No      | Undetected | Mod  | Serious | Low | NA  | NA  |
| The Biggest Loser | Atkins      |   |     |      |                     |         |    |         |            |      |         |     |     |     |
| Volumetrics       | Atkins      |   |     |      |                     |         |    |         |            |      |         |     |     |     |
| Weight Watchers   | Atkins      | 2 | 139 | 21.5 | -2.81 (-7.20, 1.55) | No      | No | No      | Undetected | High | Serious | Mod | No  | Yes |
| Zone              | Atkins      | 3 | 260 | 0.0  | -1.30 (-4.49, 1.86) | No      | No | No      | Undetected | High | Serious | Mod | No  | Yes |
| Jenny Craig       | DASH        |   |     |      |                     |         |    |         |            |      |         |     |     |     |
| Mediterranean     | DASH        | 1 | 95  | NA   | -2.01 (-6.03, 2.02) | No      | No | Serious | Undetected | Mod  | Serious | Low | No  | Yes |
| Ornish            | DASH        |   |     |      |                     |         |    |         |            |      |         |     |     |     |
| Paleolithic       | DASH        |   |     |      |                     |         |    |         |            |      |         |     |     |     |
| Portfolio         | DASH        |   |     |      |                     |         |    |         |            |      |         |     |     |     |
| Rosemary Conley   | DASH        |   |     |      |                     |         |    |         |            |      |         |     |     |     |
| The Biggest Loser | DASH        |   |     |      |                     |         |    |         |            |      |         |     |     |     |
| Volumetrics       | DASH        |   |     |      |                     |         |    |         |            |      |         |     |     |     |
| Weight Watchers   | DASH        |   |     |      |                     |         |    |         |            |      |         |     |     |     |
| Zone              | DASH        |   |     |      |                     |         |    |         |            |      |         |     |     |     |
| Mediterranean     | Jenny Craig |   |     |      |                     |         |    |         |            |      |         |     |     |     |
| Ornish            | Jenny Craig |   |     |      |                     |         |    |         |            |      |         |     |     |     |
| Paleolithic       | Jenny Craig |   |     |      |                     |         |    |         |            |      |         |     |     |     |
| Portfolio         | Jenny Craig |   |     |      |                     |         |    |         |            |      |         |     |     |     |



|                   |               |   |     |     |                    |    |    |    |            |      |           |     |     |     |  |
|-------------------|---------------|---|-----|-----|--------------------|----|----|----|------------|------|-----------|-----|-----|-----|--|
| Rosemary Conley   | Jenny Craig   |   |     |     |                    |    |    |    |            |      |           |     |     |     |  |
| The Biggest Loser | Jenny Craig   |   |     |     |                    |    |    |    |            |      |           |     |     |     |  |
| Volumetrics       | Jenny Craig   |   |     |     |                    |    |    |    |            |      |           |     |     |     |  |
| Weight Watchers   | Jenny Craig   |   |     |     |                    |    |    |    |            |      |           |     |     |     |  |
| Zone              | Jenny Craig   |   |     |     |                    |    |    |    |            |      |           |     |     |     |  |
| Ornish            | Mediterranean |   |     |     |                    |    |    |    |            |      |           |     |     |     |  |
| Paleolithic       | Mediterranean |   |     |     |                    |    |    |    |            |      |           |     |     |     |  |
| Portfolio         | Mediterranean |   |     |     |                    |    |    |    |            |      |           |     |     |     |  |
| Rosemary Conley   | Mediterranean |   |     |     |                    |    |    |    |            |      |           |     |     |     |  |
| The Biggest Loser | Mediterranean |   |     |     |                    |    |    |    |            |      |           |     |     |     |  |
| Volumetrics       | Mediterranean |   |     |     |                    |    |    |    |            |      |           |     |     |     |  |
| Weight Watchers   | Mediterranean |   |     |     |                    |    |    |    |            |      |           |     |     |     |  |
| Zone              | Mediterranean |   |     |     |                    |    |    |    |            |      |           |     |     |     |  |
| Paleolithic       | Ornish        |   |     |     |                    |    |    |    |            |      |           |     |     |     |  |
| Portfolio         | Ornish        |   |     |     |                    |    |    |    |            |      |           |     |     |     |  |
| Rosemary Conley   | Ornish        |   |     |     |                    |    |    |    |            |      |           |     |     |     |  |
| The Biggest Loser | Ornish        |   |     |     |                    |    |    |    |            |      |           |     |     |     |  |
| Volumetrics       | Ornish        |   |     |     |                    |    |    |    |            |      |           |     |     |     |  |
| Weight Watchers   | Ornish        | 1 | 51  | NA  | 1.90 (-4.35, 8.15) | No | No | No | Undetected | High | V serious | Low | No  | Yes |  |
| Zone              | Ornish        | 2 | 185 | 5.3 | 1.47 (-2.21, 5.26) | No | No | No | Undetected | High | Serious   | Mod | Yes | No  |  |
| Portfolio         | Paleolithic   |   |     |     |                    |    |    |    |            |      |           |     |     |     |  |
| Rosemary Conley   | Paleolithic   |   |     |     |                    |    |    |    |            |      |           |     |     |     |  |

|                   |                   |   |    |    |                     |         |    |    |            |      |           |     |    |     |  |
|-------------------|-------------------|---|----|----|---------------------|---------|----|----|------------|------|-----------|-----|----|-----|--|
| The Biggest Loser | Paleolithic       |   |    |    |                     |         |    |    |            |      |           |     |    |     |  |
| Volumetrics       | Paleolithic       |   |    |    |                     |         |    |    |            |      |           |     |    |     |  |
| Weight Watchers   | Paleolithic       |   |    |    |                     |         |    |    |            |      |           |     |    |     |  |
| Zone              | Paleolithic       |   |    |    |                     |         |    |    |            |      |           |     |    |     |  |
| Rosemary Conley   | Portfolio         |   |    |    |                     |         |    |    |            |      |           |     |    |     |  |
| The Biggest Loser | Portfolio         |   |    |    |                     |         |    |    |            |      |           |     |    |     |  |
| Volumetrics       | Portfolio         |   |    |    |                     |         |    |    |            |      |           |     |    |     |  |
| Weight Watchers   | Portfolio         |   |    |    |                     |         |    |    |            |      |           |     |    |     |  |
| Zone              | Portfolio         |   |    |    |                     |         |    |    |            |      |           |     |    |     |  |
| The Biggest Loser | Rosemary Conley   |   |    |    |                     |         |    |    |            |      |           |     |    |     |  |
| Volumetrics       | Rosemary Conley   |   |    |    |                     |         |    |    |            |      |           |     |    |     |  |
| Weight Watchers   | Rosemary Conley   | 1 | 89 | NA | 0.80 (-3.23, 4.82)  | Serious | No | No | Undetected | Mod  | Serious   | Low | NA | NA  |  |
| Zone              | Rosemary Conley   |   |    |    |                     |         |    |    |            |      |           |     |    |     |  |
| Volumetrics       | The Biggest Loser |   |    |    |                     |         |    |    |            |      |           |     |    |     |  |
| Weight Watchers   | The Biggest Loser |   |    |    |                     |         |    |    |            |      |           |     |    |     |  |
| Zone              | The Biggest Loser |   |    |    |                     |         |    |    |            |      |           |     |    |     |  |
| Weight Watchers   | Volumetrics       |   |    |    |                     |         |    |    |            |      |           |     |    |     |  |
| Zone              | Volumetrics       |   |    |    |                     |         |    |    |            |      |           |     |    |     |  |
| Zone              | Weight Watchers   | 1 | 56 | NA | 3.80 (-3.25, 10.90) | No      | No | No | Undetected | High | V serious | Low | No | Yes |  |

Table S31 continued: GRADE assessment for 6-month DBP reduction in individual popular diets NMA

| Comparison groups |                | Indirect evidence  |                                           |                      |                |                                     |             |                                  | Network evidence   |                      |                                                          |             |                 |                      |
|-------------------|----------------|--------------------|-------------------------------------------|----------------------|----------------|-------------------------------------|-------------|----------------------------------|--------------------|----------------------|----------------------------------------------------------|-------------|-----------------|----------------------|
| Arm 1             | Arm 2 (Ref)    | MD (95%CrI)        | First order loop of the most contribution | Low est of C1 and C2 | Intransitivity | Indirect rating without imprecision | Imprecision | Indirect rating with imprecision | MD (95%CrI)        | Incoherence, P-value | Higher rating of direct and indirect without imprecision | Incoherence | NMA Imprecision | Final network rating |
| Dietary advice    | Usual diet     | 0.59 (-1.19, 2.39) | Weight Watchers                           | Mod                  | No             | Mod                                 | Serious     | Low                              | 0.40(-1.31, 2.09)  | 0.974                | Mod                                                      | No          | Serious         | Low                  |
| Low fat           | Usual diet     | 1.84 (-0.30, 4.02) | DASH                                      | Low                  | No             | Low                                 | Serious     | V low                            | 2.22 (0.75, 3.75)  | 0.671                | High                                                     | No          | Serious         | Mod                  |
| Atkins            | Usual diet     | 3.36 (1.59, 5.20)  | Low fat                                   | High                 | No             | High                                | Serious     | Mod                              | 3.30 (1.67, 4.99)  | 0.980                | High                                                     | No          | Serious         | Mod                  |
| DASH              | Usual diet     | 3.54 (1.06, 6.20)  | Low fat                                   | High                 | No             | High                                | Serious     | Mod                              | 2.84 (1.58, 4.18)  | 0.531                | High                                                     | No          | Serious         | Mod                  |
| Jenny Craig       | Usual diet     | 7.81 (3.35, 12.30) | Low fat                                   | High                 | Serious        | Mod                                 | Serious     | Low                              | 7.81 (3.35, 12.30) | NA                   | Mod                                                      | No          | Serious         | Low                  |
| Mediterranean     | Usual diet     | 0.04 (-2.92, 2.98) |                                           |                      |                |                                     |             |                                  | 1.03 (-0.46, 2.53) | 0.445                | High                                                     | No          | Serious         | Mod                  |
| Ornish            | Usual diet     | 0.20 (-2.45, 2.80) | Low fat                                   | High                 | No             | High                                | Serious     | Mod                              | 0.20 (-2.45, 2.80) | NA                   | High                                                     | No          | Serious         | Mod                  |
| Paleolithic       | Usual diet     | 3.85 (-1.00, 8.75) | Low fat                                   | High                 | No             | High                                | Serious     | Mod                              | 3.85 (-1.00, 8.75) | NA                   | High                                                     | No          | Serious         | Mod                  |
| Portfolio         | Usual diet     | 3.98 (0.36, 7.66)  | Low fat                                   | High                 | Serious        | Mod                                 | Serious     | Low                              | 3.98 (0.36, 7.66)  | NA                   | Mod                                                      | No          | Serious         | Low                  |
| Rosemary Conley   | Usual diet     | NA                 |                                           |                      |                |                                     |             |                                  | 1.44 (-1.95, 4.85) | NA                   | Mod                                                      | No          | Serious         | Low                  |
| The Biggest Loser | Usual diet     | NA                 |                                           |                      |                |                                     |             |                                  | 2.20 (-1.11, 5.52) | NA                   | High                                                     | No          | Serious         | Mod                  |
| Volumetrics       | Usual diet     | 1.95 (-2.58, 6.53) | Low fat                                   | Mod                  | No             | Mod                                 | Serious     | Low                              | 1.95 (-2.58, 6.53) | NA                   | Mod                                                      | No          | Serious         | Low                  |
| Weight Watchers   | Usual diet     | 1.15 (-1.42, 3.69) | Dietary advice                            | Mod                  | Serious        | Low                                 | Serious     | V low                            | 1.03 (-0.70, 2.79) | 0.884                | Mod                                                      | No          | Serious         | Low                  |
| Zone              | Usual diet     | 2.33 (0.24, 4.48)  | Low fat                                   | High                 | No             | High                                | Serious     | Mod                              | 2.33 (0.24, 4.48)  | NA                   | High                                                     | No          | Serious         | Mod                  |
| Ctl - low fat     | Dietary advice | 1.32 (-0.58, 3.28) | DASH                                      | High                 | No             | High                                | Serious     | Mod                              | 1.83 (0.09, 3.62)  | 0.220                | High                                                     | No          | Serious         | Mod                  |

|                   |                |                     |                 |      |         |      |         |       |                     |       |      |    |           |       |
|-------------------|----------------|---------------------|-----------------|------|---------|------|---------|-------|---------------------|-------|------|----|-----------|-------|
| Atkins            | Dietary advice | 2.91 (1.07, 4.81)   | Low fat         | Mod  | No      | Mod  | Serious | Low   | 2.91 (1.07, 4.81)   | NA    | Mod  | No | Serious   | Low   |
| DASH              | Dietary advice | 3.00 (0.80, 5.19)   | Usual diet      | Low  | No      | Low  | Serious | V low | 2.44 (0.74, 4.25)   | 0.428 | High | No | Serious   | Mod   |
| Jenny Craig       | Dietary advice | 7.41 (2.86, 12.00)  | Low fat         | Mod  | Serious | Low  | Serious | V low | 7.41 (2.86, 12.00)  | NA    | Low  | No | Serious   | V low |
| Mediterranean     | Dietary advice | 1.06 (-1.30, 3.49)  | Usual diet      | Mod  | No      | Mod  | Serious | Low   | 0.64 (-1.36, 2.63)  | 0.480 | High | No | Serious   | Mod   |
| Ornish            | Dietary advice | -0.20 (-3.22, 2.79) | Weight Watchers | High | No      | High | Serious | Mod   | -0.22 (-2.83, 2.35) | 0.984 | High | No | Serious   | Mod   |
| Paleolithic       | Dietary advice | 3.44 (-1.51, 8.45)  | Low fat         | Mod  | No      | Mod  | Serious | Low   | 3.44 (-1.51, 8.45)  | NA    | Mod  | No | Serious   | Low   |
| Portfolio         | Dietary advice | 3.58 (-0.16, 7.37)  | Low fat         | Mod  | Serious | Low  | Serious | V low | 3.58 (-0.16, 7.37)  | NA    | Low  | No | Serious   | V low |
| Rosemary Conley   | Dietary advice | 1.03 (-2.51, 4.59)  | Weight Watchers | Mod  | Serious | Low  | Serious | V low | 1.03 (-2.51, 4.59)  | NA    | Low  | No | Serious   | V low |
| The Biggest Loser | Dietary advice | 1.79 (-1.92, 5.53)  | Usual diet      | Mod  | Serious | Low  | Serious | V low | 1.79 (-1.92, 5.53)  | NA    | Low  | No | Serious   | V low |
| Volumetrics       | Dietary advice | 1.54 (-3.07, 6.23)  | Low fat         | Mod  | No      | Mod  | Serious | Low   | 1.54 (-3.07, 6.23)  | NA    | Mod  | No | Serious   | Low   |
| Weight Watchers   | Dietary advice | 0.02 (-2.73, 2.86)  |                 |      |         |      |         |       | 0.63 (-0.86, 2.18)  | 0.602 | High | No | Serious   | Mod   |
| Zone              | Dietary advice | 1.93 (-0.53, 4.46)  | Low fat         | Mod  | No      | Mod  | Serious | Low   | 1.91 (-0.24, 4.12)  | 0.973 | Mod  | No | Serious   | Low   |
| Atkins            | Low fat        | 1.71 (-1.69, 5.10)  |                 |      |         |      |         |       | 1.07 (0.19, 1.96)   | 0.708 | High | No | No        | High  |
| DASH              | Low fat        | -0.58 (-2.85, 1.76) | Usual diet      | Low  | No      | Low  | Serious | V low | 0.62 (-0.93, 2.19)  | 0.175 | High | No | Serious   | Mod   |
| Jenny Craig       | Low fat        | NA                  |                 |      |         |      |         |       | 5.58 (1.34, 9.80)   | NA    | High | No | Serious   | Mod   |
| Mediterranean     | Low fat        | -1.10 (-3.21, 0.98) | Usual diet      | High | No      | High | Serious | Mod   | -1.19 (-3.16, 0.72) | 0.759 | High | No | Serious   | Mod   |
| Ornish            | Low fat        | -3.61 (-7.43, 0.21) |                 |      |         |      |         |       | -2.05 (-4.44, 0.27) | 0.418 | High | No | Serious   | Mod   |
| Paleolithic       | Low fat        | NA                  |                 |      |         |      |         |       | 1.60 (-3.02, 6.24)  | NA    | High | No | V serious | Low   |
| Portfolio         | Low fat        | NA                  |                 |      |         |      |         |       | 1.75 (-1.59, 5.08)  | NA    | High | No | Serious   | Mod   |
| Rosemary Conley   | Low fat        | -0.80 (-4.24, 2.63) | Atkins          | Mod  | Serious | Low  | Serious | V low | -0.80 (-4.24, 2.63) | NA    | Low  | No | Serious   | V low |

|                   |         |                      |            |      |         |       |         |       |                      |       |       |    |         |       |
|-------------------|---------|----------------------|------------|------|---------|-------|---------|-------|----------------------|-------|-------|----|---------|-------|
| The Biggest Loser | Low fat | -0.04 (-3.71, 3.57)  | Usual diet | High | Serious | Mod   | Serious | Low   | -0.04 (-3.71, 3.57)  | NA    | Mod   | No | Serious | Low   |
| Volumetrics       | Low fat | NA                   |            |      |         |       |         |       | -0.29 (-4.58, 4.01)  | NA    | Mod   | No | Serious | Low   |
| Weight Watchers   | Low fat | -1.20 (-3.06, 0.65)  | Atkins     | High | No      | High  | Serious | Mod   | -1.20 (-3.06, 0.65)  | NA    | High  | No | Serious | Mod   |
| Zone              | Low fat | 0.94 (-2.78, 4.72)   |            |      |         |       |         |       | 0.08 (-1.61, 1.78)   | 0.682 | High  | No | No      | High  |
| DASH              | Atkins  | -0.47 (-2.17, 1.27)  | Low fat    | High | No      | High  | Serious | Mod   | -0.47 (-2.17, 1.27)  | NA    | High  | No | Serious | Mod   |
| Jenny Craig       | Atkins  | 4.50 (0.17, 8.81)    | Low fat    | High | Serious | Mod   | Serious | Low   | 4.50 (0.17, 8.81)    | NA    | Mod   | No | Serious | Low   |
| Mediterranean     | Atkins  | -2.30 (-4.37, -0.25) | Low fat    | High | No      | High  | Serious | Mod   | -2.30 (-4.37, -0.25) | NA    | High  | No | Serious | Mod   |
| Ornish            | Atkins  | -3.11 (-8.98, 2.74)  |            |      |         |       |         |       | -3.12 (-5.55, -0.78) | 0.883 | High  | No | Serious | Mod   |
| Paleolithic       | Atkins  | 0.53 (-4.19, 5.23)   | Low fat    | High | No      | High  | Serious | Mod   | 0.53 (-4.19, 5.23)   | NA    | High  | No | Serious | Mod   |
| Portfolio         | Atkins  | 0.67 (-2.78, 4.12)   | Low fat    | High | Serious | Mod   | Serious | Low   | 0.67 (-2.78, 4.12)   | NA    | Mod   | No | Serious | Low   |
| Rosemary Conley   | Atkins  | NA                   |            |      |         |       |         |       | -1.88 (-5.33, 1.55)  | NA    | Mod   | No | Serious | Low   |
| The Biggest Loser | Atkins  | -1.12 (-4.86, 2.56)  | Usual diet | Mod  | Serious | Low   | Serious | V low | -1.12 (-4.86, 2.56)  | NA    | Low   | No | Serious | V low |
| Volumetrics       | Atkins  | -1.37 (-5.75, 3.01)  | Low fat    | Mod  | No      | Mod   | Serious | Low   | -1.37 (-5.75, 3.01)  | NA    | Mod   | No | Serious | Low   |
| Weight Watchers   | Atkins  | -2.29 (-4.77, 0.18)  | Usual diet | Mod  | No      | Mod   | Serious | Low   | -2.26 (-4.23, -0.34) | 0.945 | High  | No | Serious | Mod   |
| Zone              | Atkins  | -0.76 (-3.41, 1.86)  | Low fat    | High | No      | High  | Serious | Mod   | -0.99 (-2.77, 0.80)  | 0.773 | High  | No | Serious | Mod   |
| Jenny Craig       | DASH    | 4.97 (0.44, 9.46)    | Low fat    | High | Serious | Mod   | Serious | Low   | 4.97 (0.44, 9.46)    | NA    | Mod   | No | Serious | Low   |
| Mediterranean     | DASH    | -1.80 (-3.84, 0.15)  | Usual diet | Low  | No      | Low   | Serious | V low | -1.80 (-3.68, -0.03) | 0.941 | Mod   | No | Serious | Low   |
| Ornish            | DASH    | -2.65 (-5.38, -0.02) | Low fat    | High | No      | High  | Serious | Mod   | -2.65 (-5.38, -0.02) | NA    | High  | No | Serious | Mod   |
| Paleolithic       | DASH    | 1.00 (-3.90, 5.89)   | Low fat    | High | No      | High  | Serious | Mod   | 1.00 (-3.90, 5.89)   | NA    | High  | No | Serious | Mod   |
| Portfolio         | DASH    | 1.14 (-2.56, 4.79)   | Low fat    | High | Serious | Mod   | Serious | Low   | 1.14 (-2.56, 4.79)   | NA    | Mod   | No | Serious | Low   |
| Rosemary Conley   | DASH    | -1.41 (-4.96, 2.08)  | Usual diet | Low  | Serious | V low | Serious | V low | -1.41 (-4.96, 2.08)  | NA    | V low | No | Serious | V low |

|                   |               |                       |                     |      |         |       |         |       |                       |    |       |    |         |       |
|-------------------|---------------|-----------------------|---------------------|------|---------|-------|---------|-------|-----------------------|----|-------|----|---------|-------|
| The Biggest Loser | DASH          | -0.64 (-4.26, 2.88)   | Usual diet          | Low  | Serious | V low | Serious | V low | -0.64 (-4.26, 2.88)   | NA | V low | No | Serious | V low |
| Volumetrics       | DASH          | -0.90 (-5.48, 3.68)   | Low fat             | Mod  | No      | Mod   | Serious | Low   | -0.90 (-5.48, 3.68)   | NA | Mod   | No | Serious | Low   |
| Weight Watchers   | DASH          | -1.80 (-3.73, 0.07)   | Usual diet          | Low  | Serious | V low | Serious | V low | -1.80 (-3.73, 0.07)   | NA | V low | No | Serious | V low |
| Zone              | DASH          | -0.52 (-2.70, 1.65)   | Low fat             | High | No      | High  | Serious | Mod   | -0.52 (-2.70, 1.65)   | NA | High  | No | Serious | Mod   |
| Mediterranean     | Jenny Craig   | -6.79 (-11.45, -2.16) | Low fat             | High | Serious | Mod   | Serious | Low   | -6.79 (-11.45, -2.16) | NA | Mod   | No | Serious | Low   |
| Ornish            | Jenny Craig   | -7.62 (-12.48, -2.80) | Low fat             | High | Serious | Mod   | Serious | Low   | -7.62 (-12.48, -2.80) | NA | Mod   | No | Serious | Low   |
| Paleolithic       | Jenny Craig   | -3.97 (-10.22, 2.32)  | Low fat             | High | Serious | Mod   | Serious | Low   | -3.97 (-10.22, 2.32)  | NA | Mod   | No | Serious | Low   |
| Portfolio         | Jenny Craig   | -3.83 (-9.20, 1.56)   | Low fat             | High | Serious | Mod   | Serious | Low   | -3.83 (-9.20, 1.56)   | NA | Mod   | No | Serious | Low   |
| Rosemary Conley   | Jenny Craig   | -6.37 (-11.82, -0.95) | Low fat, Atkins     | Low  | Serious | V low | Serious | V low | -6.37 (-11.82, -0.95) | NA | V low | No | Serious | V low |
| The Biggest Loser | Jenny Craig   | -5.61 (-11.19, -0.06) | Low fat, Usual diet | High | Serious | Mod   | Serious | Low   | -5.61 (-11.19, -0.06) | NA | Mod   | No | Serious | Low   |
| Volumetrics       | Jenny Craig   | -5.86 (-11.88, 0.15)  | Low fat             | Mod  | Serious | Low   | Serious | V low | -5.86 (-11.88, 0.15)  | NA | Low   | No | Serious | V low |
| Weight Watchers   | Jenny Craig   | -6.77 (-11.37, -2.16) | Low fat, Atkins     | High | Serious | Mod   | Serious | Low   | -6.77 (-11.37, -2.16) | NA | Mod   | No | Serious | Low   |
| Zone              | Jenny Craig   | -5.48 (-10.01, -0.91) | Low fat             | High | Serious | Mod   | Serious | Low   | -5.48 (-10.01, -0.91) | NA | Mod   | No | Serious | Low   |
| Ornish            | Mediterranean | -0.82 (-3.75, 2.04)   | Low fat             | High | No      | High  | Serious | Mod   | -0.82 (-3.75, 2.04)   | NA | High  | No | Serious | Mod   |
| Paleolithic       | Mediterranean | 2.82 (-2.18, 7.87)    | Low fat             | High | No      | High  | Serious | Mod   | 2.82 (-2.18, 7.87)    | NA | High  | No | Serious | Mod   |
| Portfolio         | Mediterranean | 2.96 (-0.86, 6.83)    | Low fat             | High | Serious | Mod   | Serious | Low   | 2.96 (-0.86, 6.83)    | NA | Mod   | No | Serious | Low   |
| Rosemary Conley   | Mediterranean | 0.42 (-3.24, 4.07)    | Usual diet          | Mod  | Serious | Low   | Serious | V low | 0.42 (-3.24, 4.07)    | NA | Low   | No | Serious | V low |
| The Biggest Loser | Mediterranean | 1.18 (-2.47, 4.82)    | Usual diet          | High | Serious | Mod   | Serious | Low   | 1.18 (-2.47, 4.82)    | NA | Mod   | No | Serious | Low   |
| Volumetrics       | Mediterranean | 0.92 (-3.77, 5.65)    | Low fat             | Mod  | No      | Mod   | Serious | Low   | 0.92 (-3.77, 5.65)    | NA | Mod   | No | Serious | Low   |
| Weight Watchers   | Mediterranean | 0.02 (-2.10, 2.16)    | Usual diet          | Mod  | No      | Mod   | Serious | Low   | 0.02 (-2.10, 2.16)    | NA | Mod   | No | Serious | Low   |
| Zone              | Mediterranean | 1.31 (-1.10, 3.77)    | Low fat             | High | No      | High  | Serious | Mod   | 1.31 (-1.10, 3.77)    | NA | High  | No | Serious | Mod   |

|                   |                 |                     |                     |      |         |      |         |       |                     |       |      |    |         |       |
|-------------------|-----------------|---------------------|---------------------|------|---------|------|---------|-------|---------------------|-------|------|----|---------|-------|
| Paleolithic       | Ornish          | 3.66 (-1.51, 8.88)  | Low fat             | High | No      | High | Serious | Mod   | 3.66 (-1.51, 8.88)  | NA    | High | No | Serious | Mod   |
| Portfolio         | Ornish          | 3.79 (-0.24, 7.92)  | Low fat             | High | Serious | Mod  | Serious | Low   | 3.79 (-0.24, 7.92)  | NA    | Mod  | No | Serious | Low   |
| Rosemary Conley   | Ornish          | 1.24 (-2.75, 5.30)  | Atkins              | Mod  | Serious | Low  | Serious | V low | 1.24 (-2.75, 5.30)  | NA    | Low  | No | Serious | V low |
| The Biggest Loser | Ornish          | 2.00 (-2.19, 6.26)  | Low fat, Usual diet | High | Serious | Mod  | Serious | Low   | 2.00 (-2.19, 6.26)  | NA    | Mod  | No | Serious | Low   |
| Volumetrics       | Ornish          | 1.76 (-3.10, 6.71)  | Low fat             | Mod  | No      | Mod  | Serious | Low   | 1.76 (-3.10, 6.71)  | NA    | Mod  | No | Serious | Low   |
| Weight Watchers   | Ornish          | 0.48 (-2.58, 3.60)  | Atkins              | High | No      | High | Serious | Mod   | 0.85 (-1.79, 3.58)  | 0.660 | High | No | Serious | Mod   |
| Zone              | Ornish          | 2.47 (-3.60, 8.56)  |                     |      |         |      |         |       | 2.13 (-0.37, 4.73)  | 0.876 | High | No | Serious | Mod   |
| Portfolio         | Paleolithic     | 0.14 (-5.60, 5.85)  | Low fat             | High | Serious | Mod  | Serious | Low   | 0.14 (-5.60, 5.85)  | NA    | Mod  | No | Serious | Low   |
| Rosemary Conley   | Paleolithic     | -2.42 (-8.21, 3.36) | Low fat, Atkins     | Mod  | Serious | Low  | Serious | V low | -2.42 (-8.21, 3.36) | NA    | Low  | No | Serious | V low |
| The Biggest Loser | Paleolithic     | -1.65 (-7.55, 4.21) | Low fat, Usual diet | High | Serious | Mod  | Serious | Low   | -1.65 (-7.55, 4.21) | NA    | Mod  | No | Serious | Low   |
| Volumetrics       | Paleolithic     | -1.89 (-8.24, 4.44) | Low fat             | Mod  | No      | Mod  | Serious | Low   | -1.89 (-8.24, 4.44) | NA    | Mod  | No | Serious | Low   |
| Weight Watchers   | Paleolithic     | -2.80 (-7.83, 2.19) | Low fat, Atkins     | High | No      | High | Serious | Mod   | -2.80 (-7.83, 2.19) | NA    | High | No | Serious | Mod   |
| Zone              | Paleolithic     | -1.52 (-6.45, 3.41) | Low fat             | High | No      | High | Serious | Mod   | -1.52 (-6.45, 3.41) | NA    | High | No | Serious | Mod   |
| Rosemary Conley   | Portfolio       | -2.55 (-7.35, 2.23) | Low fat, Atkins     | Mod  | Serious | Low  | Serious | V low | -2.55 (-7.35, 2.23) | NA    | Low  | No | Serious | V low |
| The Biggest Loser | Portfolio       | -1.78 (-6.73, 3.10) | Low fat, Usual diet | High | Serious | Mod  | Serious | Low   | -1.78 (-6.73, 3.10) | NA    | Mod  | No | Serious | Low   |
| Volumetrics       | Portfolio       | -2.04 (-7.47, 3.41) | Low fat             | Mod  | Serious | Low  | Serious | V low | -2.04 (-7.47, 3.41) | NA    | Low  | No | Serious | V low |
| Weight Watchers   | Portfolio       | -2.94 (-6.77, 0.86) | Low fat, Atkins     | High | Serious | Mod  | Serious | Low   | -2.94 (-6.77, 0.86) | NA    | Mod  | No | Serious | Low   |
| Zone              | Portfolio       | -1.66 (-5.38, 2.11) | Low fat             | High | Serious | Mod  | Serious | Low   | -1.66 (-5.38, 2.11) | NA    | Mod  | No | Serious | Low   |
| The Biggest Loser | Rosemary Conley | 0.77 (-4.01, 5.49)  | Usual diet          | Mod  | Serious | Low  | Serious | V low | 0.77 (-4.01, 5.49)  | NA    | Low  | No | Serious | V low |
| Volumetrics       | Rosemary Conley | 0.51 (-4.97, 6.02)  | Low fat, Atkins     | Mod  | Serious | Low  | Serious | V low | 0.51 (-4.97, 6.02)  | NA    | Low  | No | Serious | V low |
| Weight Watchers   | Rosemary Conley | NA                  |                     |      |         |      |         |       | -0.39 (-3.85, 3.06) | NA    | Mod  | No | Serious | Low   |

|                 |                   |                     |                     |      |         |      |         |       |                     |       |      |    |         |       |
|-----------------|-------------------|---------------------|---------------------|------|---------|------|---------|-------|---------------------|-------|------|----|---------|-------|
| Zone            | Rosemary Conley   | 0.89 (-2.82, 4.65)  | Atkins              | Mod  | Serious | Low  | Serious | V low | 0.89 (-2.82, 4.65)  | NA    | Low  | No | Serious | V low |
| Volumetrics     | The Biggest Loser | -0.25 (-5.86, 5.42) | Low fat, Usual diet | Mod  | Serious | Low  | Serious | V low | -0.25 (-5.86, 5.42) | NA    | Low  | No | Serious | V low |
| Weight Watchers | The Biggest Loser | -1.16 (-4.88, 2.62) | Usual diet          | Mod  | Serious | Low  | Serious | V low | -1.16 (-4.88, 2.62) | NA    | Low  | No | Serious | V low |
| Zone            | The Biggest Loser | 0.12 (-3.78, 4.11)  | Low fat, Usual diet | High | Serious | Mod  | Serious | Low   | 0.12 (-3.78, 4.11)  | NA    | Mod  | No | Serious | Low   |
| Weight Watchers | Volumetrics       | -0.90 (-5.60, 3.76) | Low fat, Atkins     | Mod  | No      | Mod  | Serious | Low   | -0.90 (-5.60, 3.76) | NA    | Mod  | No | Serious | Low   |
| Zone            | Volumetrics       | 0.38 (-4.23, 5.01)  | Low fat             | Mod  | No      | Mod  | Serious | Low   | 0.38 (-4.23, 5.01)  | NA    | Mod  | No | Serious | Low   |
| Zone            | Weight Watchers   | 0.81 (-1.71, 3.35)  | Dietary advice      | High | No      | High | Serious | Mod   | 1.28 (-1.01, 3.57)  | 0.353 | High | No | Serious | Mod   |



Table S32: GRADE assessment for 6-month LDL reduction in individual popular diets NMA

| Arm 1             | Arm 2 (Ref)    | No. of study | No. of patients | I-square, % | MD (95%CrI)           | RoB     | Inconsistency | Indirectness | Publication bias | Direct rating without imprecision | Imprecision | Direct rating with imprecision | Direct is more precise than indirect? | Need to rate indirect? |
|-------------------|----------------|--------------|-----------------|-------------|-----------------------|---------|---------------|--------------|------------------|-----------------------------------|-------------|--------------------------------|---------------------------------------|------------------------|
| Dietary advice    | Usual diet     | 2            | 113             | 0.0         | -1.73 (-17.80, 14.40) | Serious | No            | No           | Undetected       | Mod                               | Serious     | Low                            | No                                    | Yes                    |
| Low fat           | Usual diet     | 2            | 201             | 0.0         | 7.57 (-3.41, 18.40)   | No      | No            | No           | Undetected       | High                              | Serious     | Mod                            | No                                    | Yes                    |
| Atkins            | Usual diet     | 1            | 70              | NA          | 2.71 (-18.10, 23.50)  | Serious | No            | No           | Undetected       | Mod                               | V serious   | V low                          | No                                    | Yes                    |
| DASH              | Usual diet     | 4            | 428             | 11.6        | 2.85 (-5.44, 11.30)   | No      | No            | No           | Undetected       | High                              | Serious     | Mod                            | Yes                                   | No                     |
| Jenny Craig       | Usual diet     | 1            | 47              | NA          | -5.68 (-38.60, 27.30) | No      | No            | No           | Undetected       | High                              | V serious   | V low                          | No                                    | Yes                    |
| Mediterranean     | Usual diet     | 9            | 1027            | 79.6        | 3.49 (-1.18, 8.32)    | No      | No            | No           | Undetected       | High                              | Serious     | Mod                            | Yes                                   | No                     |
| Ornish            | Usual diet     |              |                 |             |                       |         |               |              |                  |                                   |             |                                |                                       |                        |
| Paleolithic       | Usual diet     |              |                 |             |                       |         |               |              |                  |                                   |             |                                |                                       |                        |
| Portfolio         | Usual diet     |              |                 |             |                       |         |               |              |                  |                                   |             |                                |                                       |                        |
| Rosemary Conley   | Usual diet     | 1            | 78              | NA          | 13.50 (-3.88, 30.90)  | Serious | No            | No           | Undetected       | Mod                               | V serious   | V low                          | NA                                    | NA                     |
| South Beach       | Usual diet     |              |                 |             |                       |         |               |              |                  |                                   |             |                                |                                       |                        |
| The Biggest Loser | Usual diet     | 1            | 260             | NA          | 3.93 (-0.27, 8.13)    | No      | No            | No           | Undetected       | High                              | Serious     | Mod                            | NA                                    | NA                     |
| Volumetrics       | Usual diet     |              |                 |             |                       |         |               |              |                  |                                   |             |                                |                                       |                        |
| Weight Watchers   | Usual diet     | 3            | 578             | 0.0         | 3.07 (-7.22, 13.50)   | Serious | No            | No           | Undetected       | Mod                               | Serious     | Low                            | Yes                                   | Yes                    |
| Zone              | Usual diet     |              |                 |             |                       |         |               |              |                  |                                   |             |                                |                                       |                        |
| Low fat           | Dietary advice | 1            | 98              | NA          | 11.9 (3.72, 20.10)    | Serious | No            | No           | Undetected       | Mod                               | Serious     | Low                            | No                                    | Yes                    |
| Atkins            | Dietary advice |              |                 |             |                       |         |               |              |                  |                                   |             |                                |                                       |                        |
| DASH              | Dietary advice |              |                 |             |                       |         |               |              |                  |                                   |             |                                |                                       |                        |

|                   |                |    |      |      |                       |         |         |         |            |      |           |       |     |     |
|-------------------|----------------|----|------|------|-----------------------|---------|---------|---------|------------|------|-----------|-------|-----|-----|
| Jenny Craig       | Dietary advice | 3  | 551  | 0.0  | 0.14(-9.29, 9.48)     | No      | No      | No      | Undetected | High | Serious   | Mod   | Yes | No  |
| Mediterranean     | Dietary advice | 3  | 257  | 97.7 | 6.28 (-2.68, 15.40)   | No      | Serious | No      | Undetected | Mod  | Serious   | Low   | No  | Yes |
| Ornish            | Dietary advice | 1  | 93   | 0.0  | 9.50 (-3.93, 22.90)   | No      | No      | Serious | Undetected | Mod  | V serious | V low | No  | Yes |
| Paleolithic       | Dietary advice |    |      |      |                       |         |         |         |            |      |           |       |     |     |
| Portfolio         | Dietary advice |    |      |      |                       |         |         |         |            |      |           |       |     |     |
| Rosemary Conley   | Dietary advice |    |      |      |                       |         |         |         |            |      |           |       |     |     |
| South Beach       | Dietary advice |    |      |      |                       |         |         |         |            |      |           |       |     |     |
| The Biggest Loser | Dietary advice |    |      |      |                       |         |         |         |            |      |           |       |     |     |
| Volumetrics       | Dietary advice |    |      |      |                       |         |         |         |            |      |           |       |     |     |
| Weight Watchers   | Dietary advice | 2  | 357  | 51.7 | 0.66(-10.70, 11.60)   | No      | No      | No      | Undetected | High | Serious   | Mod   | No  | Yes |
| Zone              | Dietary advice |    |      |      |                       |         |         |         |            |      |           |       |     |     |
| Atkins            | Low fat        | 30 | 2717 | 69.7 | -4.34 (-7.36, -1.37)  | Serious | No      | No      | Undetected | Mod  | Serious   | Low   | Yes | Yes |
| DASH              | Low fat        | 1  | 54   | NA   | 7.70 (-9.19, 24.60)   | No      | No      | No      | Undetected | High | V serious | V low | No  | Yes |
| Jenny Craig       | Low fat        | 1  | 227  | NA   | 1.03 (-8.11, 10.20)   | No      | No      | No      | Undetected | High | Serious   | Mod   | Yes | No  |
| Mediterranean     | Low fat        | 4  | 424  | 92.7 | 7.00(-0.31, 14.60)    | No      | Serious | No      | Undetected | Mod  | Serious   | Low   | No  | Yes |
| Ornish            | Low fat        | 1  | 127  | NA   | 0.82(-9.57, 11.20)    | No      | No      | No      | Undetected | High | Serious   | Mod   | Yes | No  |
| Paleolithic       | Low fat        | 1  | 161  | NA   | 5.41 (-5.95, 16.80)   | No      | No      | No      | Undetected | High | Serious   | Mod   | NA  | NA  |
| Portfolio         | Low fat        | 1  | 345  | NA   | 19.40 (13.90, 24.90)  | No      | No      | No      | Undetected | High | Serious   | Mod   | NA  | NA  |
| Rosemary Conley   | Low fat        |    |      |      |                       |         |         |         |            |      |           |       |     |     |
| South Beach       | Low fat        | 1  | 45   | NA   | -2.48 (-15.60, 10.60) | No      | No      | No      | Undetected | High | V serious | V low | NA  | NA  |
| The Biggest Loser | Low fat        |    |      |      |                       |         |         |         |            |      |           |       |     |     |

|                   |         |    |     |      |                       |         |    |         |            |      |           |       |     |     |
|-------------------|---------|----|-----|------|-----------------------|---------|----|---------|------------|------|-----------|-------|-----|-----|
| Volumetrics       | Low fat | 1  | 71  | NA   | 5.29 (-3.99, 14.60)   | No      | No | No      | Undetected | High | V serious | Low   | NA  | NA  |
| Weight Watchers   | Low fat |    |     |      |                       |         |    |         |            |      |           |       |     |     |
| Zone              | Low fat | 10 | 634 | 20.9 | -6.06 (-11.50, -0.66) | Serious | No | No      | Undetected | Mod  | Serious   | Low   | Yes | Yes |
| DASH              | Atkins  |    |     |      |                       |         |    |         |            |      |           |       |     |     |
| Jenny Craig       | Atkins  |    |     |      |                       |         |    |         |            |      |           |       |     |     |
| Mediterranean     | Atkins  | 1  | 173 | NA   | 5.30 (4.22, 6.38)     | No      | No | Serious | Undetected | Mod  | Serious   | Low   | Yes | Yes |
| Ornish            | Atkins  | 2  | 138 | 0.0  | 8.29 (-4.39, 21.10)   | No      | No | No      | Undetected | High | Serious   | Mod   | Yes | No  |
| Paleolithic       | Atkins  |    |     |      |                       |         |    |         |            |      |           |       |     |     |
| Portfolio         | Atkins  |    |     |      |                       |         |    |         |            |      |           |       |     |     |
| Rosemary Conley   | Atkins  | 1  | 74  | NA   | 10.80 (-4.77, 26.40)  | Serious | No | No      | Undetected | Mod  | V serious | V low | NA  | NA  |
| South Beach       | Atkins  |    |     |      |                       |         |    |         |            |      |           |       |     |     |
| The Biggest Loser | Atkins  |    |     |      |                       |         |    |         |            |      |           |       |     |     |
| Volumetrics       | Atkins  |    |     |      |                       |         |    |         |            |      |           |       |     |     |
| Weight Watchers   | Atkins  | 2  | 131 | 0.0  | 7.22 (-6.46, 21.10)   | Serious | No | No      | Undetected | Mod  | Serious   | Low   | No  | Yes |
| Zone              | Atkins  | 3  | 239 | 0.0  | 3.42 (-6.59, 13.50)   | No      | No | No      | Undetected | High | Serious   | Mod   | No  | Yes |
| Jenny Craig       | DASH    |    |     |      |                       |         |    |         |            |      |           |       |     |     |
| Mediterranean     | DASH    | 1  | 95  | NA   | -0.00 (-15.40, 15.30) | No      | No | Serious | Undetected | Mod  | V serious | V low | No  | Yes |
| Ornish            | DASH    |    |     |      |                       |         |    |         |            |      |           |       |     |     |
| Paleolithic       | DASH    |    |     |      |                       |         |    |         |            |      |           |       |     |     |
| Portfolio         | DASH    |    |     |      |                       |         |    |         |            |      |           |       |     |     |
| Rosemary Conley   | DASH    |    |     |      |                       |         |    |         |            |      |           |       |     |     |
| South Beach       | DASH    |    |     |      |                       |         |    |         |            |      |           |       |     |     |
| The Biggest Loser | DASH    |    |     |      |                       |         |    |         |            |      |           |       |     |     |
| Volumetrics       | DASH    |    |     |      |                       |         |    |         |            |      |           |       |     |     |

|                   |               |   |    |    |                       |    |    |    |            |      |           |       |    |     |
|-------------------|---------------|---|----|----|-----------------------|----|----|----|------------|------|-----------|-------|----|-----|
| Weight Watchers   | DASH          |   |    |    |                       |    |    |    |            |      |           |       |    |     |
| Zone              | DASH          |   |    |    |                       |    |    |    |            |      |           |       |    |     |
| Mediterranean     | Jenny Craig   |   |    |    |                       |    |    |    |            |      |           |       |    |     |
| Ornish            | Jenny Craig   |   |    |    |                       |    |    |    |            |      |           |       |    |     |
| Paleolithic       | Jenny Craig   |   |    |    |                       |    |    |    |            |      |           |       |    |     |
| Portfolio         | Jenny Craig   |   |    |    |                       |    |    |    |            |      |           |       |    |     |
| Rosemary Conley   | Jenny Craig   |   |    |    |                       |    |    |    |            |      |           |       |    |     |
| South Beach       | Jenny Craig   |   |    |    |                       |    |    |    |            |      |           |       |    |     |
| The Biggest Loser | Jenny Craig   |   |    |    |                       |    |    |    |            |      |           |       |    |     |
| Volumetrics       | Jenny Craig   |   |    |    |                       |    |    |    |            |      |           |       |    |     |
| Weight Watchers   | Jenny Craig   | 1 | 56 | NA | -6.18 (-24.70, 12.30) | No | No | No | Undetected | High | V serious | V low | No | Yes |
| Zone              | Jenny Craig   |   |    |    |                       |    |    |    |            |      |           |       |    |     |
| Ornish            | Mediterranean |   |    |    |                       |    |    |    |            |      |           |       |    |     |
| Paleolithic       | Mediterranean |   |    |    |                       |    |    |    |            |      |           |       |    |     |
| Portfolio         | Mediterranean |   |    |    |                       |    |    |    |            |      |           |       |    |     |
| Rosemary Conley   | Mediterranean |   |    |    |                       |    |    |    |            |      |           |       |    |     |
| South Beach       | Mediterranean |   |    |    |                       |    |    |    |            |      |           |       |    |     |
| The Biggest Loser | Mediterranean |   |    |    |                       |    |    |    |            |      |           |       |    |     |
| Volumetrics       | Mediterranean |   |    |    |                       |    |    |    |            |      |           |       |    |     |
| Weight Watchers   | Mediterranean |   |    |    |                       |    |    |    |            |      |           |       |    |     |
| Zone              | Mediterranean |   |    |    |                       |    |    |    |            |      |           |       |    |     |
| Paleolithic       | Ornish        |   |    |    |                       |    |    |    |            |      |           |       |    |     |
| Portfolio         | Ornish        |   |    |    |                       |    |    |    |            |      |           |       |    |     |

|                   |                 |   |     |     |                       |         |    |    |            |      |           |       |     |     |
|-------------------|-----------------|---|-----|-----|-----------------------|---------|----|----|------------|------|-----------|-------|-----|-----|
| Rosemary Conley   | Ornish          |   |     |     |                       |         |    |    |            |      |           |       |     |     |
| South Beach       | Ornish          |   |     |     |                       |         |    |    |            |      |           |       |     |     |
| The Biggest Loser | Ornish          |   |     |     |                       |         |    |    |            |      |           |       |     |     |
| Volumetrics       | Ornish          |   |     |     |                       |         |    |    |            |      |           |       |     |     |
| Weight Watchers   | Ornish          | 1 | 51  | NA  | -10.6 (-35.40, 14.20) | No      | No | No | Undetected | High | V serious | Low   | No  | Yes |
| Zone              | Ornish          | 2 | 176 | 0.0 | -4.75 (-16.80, 7.16)  | No      | No | No | Undetected | High | Serious   | Mod   | Yes | No  |
| Portfolio         | Paleolithic     |   |     |     |                       |         |    |    |            |      |           |       |     |     |
| Rosemary Conley   | Paleolithic     |   |     |     |                       |         |    |    |            |      |           |       |     |     |
| South Beach       | Paleolithic     |   |     |     |                       |         |    |    |            |      |           |       |     |     |
| The Biggest Loser | Paleolithic     |   |     |     |                       |         |    |    |            |      |           |       |     |     |
| Volumetrics       | Paleolithic     |   |     |     |                       |         |    |    |            |      |           |       |     |     |
| Weight Watchers   | Paleolithic     |   |     |     |                       |         |    |    |            |      |           |       |     |     |
| Zone              | Paleolithic     |   |     |     |                       |         |    |    |            |      |           |       |     |     |
| Rosemary Conley   | Portfolio       |   |     |     |                       |         |    |    |            |      |           |       |     |     |
| South Beach       | Portfolio       |   |     |     |                       |         |    |    |            |      |           |       |     |     |
| The Biggest Loser | Portfolio       |   |     |     |                       |         |    |    |            |      |           |       |     |     |
| Volumetrics       | Portfolio       |   |     |     |                       |         |    |    |            |      |           |       |     |     |
| Weight Watchers   | Portfolio       |   |     |     |                       |         |    |    |            |      |           |       |     |     |
| Zone              | Portfolio       |   |     |     |                       |         |    |    |            |      |           |       |     |     |
| South Beach       | Rosemary Conley |   |     |     |                       |         |    |    |            |      |           |       |     |     |
| The Biggest Loser | Rosemary Conley |   |     |     |                       |         |    |    |            |      |           |       |     |     |
| Volumetrics       | Rosemary Conley |   |     |     |                       |         |    |    |            |      |           |       |     |     |
| Weight Watchers   | Rosemary Conley | 1 | 87  | NA  | -0.40(-14.60, 13.80)  | Serious | No | No | Undetected | Mod  | V serious | V low | NA  | NA  |

|                   |                   |   |    |    |                     |    |    |    |            |      |           |       |    |     |
|-------------------|-------------------|---|----|----|---------------------|----|----|----|------------|------|-----------|-------|----|-----|
| Zone              | Rosemary Conley   |   |    |    |                     |    |    |    |            |      |           |       |    |     |
| The Biggest Loser | South Beach       |   |    |    |                     |    |    |    |            |      |           |       |    |     |
| Volumetrics       | South Beach       |   |    |    |                     |    |    |    |            |      |           |       |    |     |
| Weight Watchers   | South Beach       |   |    |    |                     |    |    |    |            |      |           |       |    |     |
| Zone              | South Beach       |   |    |    |                     |    |    |    |            |      |           |       |    |     |
| Volumetrics       | The Biggest Loser |   |    |    |                     |    |    |    |            |      |           |       |    |     |
| Weight Watchers   | The Biggest Loser |   |    |    |                     |    |    |    |            |      |           |       |    |     |
| Zone              | The Biggest Loser |   |    |    |                     |    |    |    |            |      |           |       |    |     |
| Weight Watchers   | Volumetrics       |   |    |    |                     |    |    |    |            |      |           |       |    |     |
| Zone              | Volumetrics       |   |    |    |                     |    |    |    |            |      |           |       |    |     |
| Zone              | Weight Watchers   | 1 | 56 | NA | 0.90(-19.70, 21.50) | No | No | No | Undetected | High | V serious | V low | No | Yes |

Table S32 continued: GRADE assessment for 6-month LDL reduction in individual popular diets NMA

| Comparison groups |             | Indirect evidence     |                                           |                     |                |                                     |             |                                  | Network evidence      |                      |                                                          |             |                 |                      |
|-------------------|-------------|-----------------------|-------------------------------------------|---------------------|----------------|-------------------------------------|-------------|----------------------------------|-----------------------|----------------------|----------------------------------------------------------|-------------|-----------------|----------------------|
| Arm 1             | Arm 2 (Ref) | MD (95%CrI)           | First order loop of the most contribution | Lowest of C1 and C2 | Intransitivity | Indirect rating without imprecision | Imprecision | Indirect rating with imprecision | MD (95%CrI)           | Incoherence, P-value | Higher rating of direct and indirect without imprecision | Incoherence | NMA Imprecision | Final network rating |
| Dietary advice    | Usual diet  | -1.75 (-9.12, 5.64)   | Mediterranean                             | High                | No             | High                                | V serious   | Low                              | -2.01 (-8.35, 4.35)   | 0.996                | High                                                     | No          | Serious         | Mod                  |
| Low fat           | Usual diet  | -0.13 (-6.51, 6.22)   | Mediterranean                             | Mod                 | No             | Mod                                 | V serious   | V low                            | 1.92 (-3.54, 7.38)    | 0.199                | High                                                     | No          | Serious         | Mod                  |
| Atkins            | Usual diet  | -3.26 (-9.48, 2.91)   | Mediterranean                             | Mod                 | No             | Mod                                 | Serious     | Low                              | -2.75 (-8.56, 3.00)   | 0.519                | Mod                                                      | No          | Serious         | Low                  |
| DASH              | Usual diet  | 7.18 (-7.08, 21.6)    | Mediterranean                             |                     |                |                                     |             |                                  | 3.93 (-3.19, 11.20)   | 0.606                | High                                                     | No          | Serious         | Mod                  |
| Jenny Craig       | Usual diet  | 0.83 (-9.06, 10.90)   | Dietary advice                            | Mod                 | No             | Mod                                 | V serious   | V low                            | 0.21 (-8.54, 8.93)    | 0.623                | High                                                     | No          | V serious       | Low                  |
| Mediterranean     | Usual diet  | 7.62 (-0.89, 16.30)   | Low fat                                   |                     |                |                                     |             |                                  | 4.59 (0.60, 8.73)     | 0.429                | High                                                     | No          | Serious         | Mod                  |
| Ornish            | Usual diet  | 4.71 (-3.45, 12.99)   | Low fat                                   | High                | No             | High                                | Serious     | Mod                              | 4.71 (-3.45, 12.99)   | NA                   | High                                                     | No          | Serious         | Mod                  |
| Paleolithic       | Usual diet  | 7.27 (-7.71, 22.26)   | Low fat                                   | High                | No             | High                                | V serious   | Low                              | 7.27 (-7.71, 22.26)   | NA                   | High                                                     | No          | V serious       | Low                  |
| Portfolio         | Usual diet  | 21.29 (10.03, 32.55)  | Low fat                                   | Mod                 | No             | Mod                                 | Serious     | Low                              | 21.29 (10.03, 32.55)  | NA                   | Mod                                                      | No          | Serious         | Low                  |
| Rosemary Conley   | Usual diet  | NA                    |                                           |                     |                |                                     |             |                                  | 7.15 (-4.66, 19.00)   | NA                   | Mod                                                      | No          | V serious       | V low                |
| South Beach       | Usual diet  | -0.64 (-16.96, 15.63) | Low fat                                   | High                | No             | High                                | V serious   | Low                              | -0.64 (-16.96, 15.63) | NA                   | High                                                     | No          | V serious       | Low                  |
| The Biggest Loser | Usual diet  | NA                    |                                           |                     |                |                                     |             |                                  | 3.90 (-5.64, 13.42)   | NA                   | High                                                     | No          | Serious         | Mod                  |
| Volumetrics       | Usual diet  | 7.13 (-6.36, 20.53)   | Low fat                                   | High                | No             | High                                | V serious   | Low                              | 7.13 (-6.36, 20.53)   | NA                   | High                                                     | No          | V serious       | Low                  |

|                   |                |                       |                |      |         |      |           |       |                      |      |      |    |           |       |
|-------------------|----------------|-----------------------|----------------|------|---------|------|-----------|-------|----------------------|------|------|----|-----------|-------|
| Weight Watchers   | Usual diet     | -0.98 (-12.40, 10.20) | Dietary advice | Mod  | No      | Mod  | V serious | V low | 7.13 (-6.36, 20.53)  | NA   | Mod  | No | V serious | V low |
| Zone              | Usual diet     | -2.89 (-9.26, 3.47)   | Low fat        | Mod  | No      | Mod  | Serious   | Low   | -2.89 (-9.26, 3.47)  | NA   | Mod  | No | Serious   | Low   |
| Low fat           | Dietary advice | 1.50 (-5.62, 8.65)    | Mediterranean  | Mod  | No      | Mod  | Serious   | Low   | 3.94 (-2.43, 10.20)  | 0.16 | Mod  | No | Serious   | Low   |
| Atkins            | Dietary advice | -0.65 (-6.45, 5.17)   | Low fat        | Mod  | No      | Mod  | V serious | V low | -0.65 (-6.45, 5.17)  | NA   | Mod  | No | V serious | V low |
| DASH              | Dietary advice | 5.92 (-2.49, 14.30)   | Usual diet     | Mod  | No      | Mod  | Serious   | Low   | 5.92 (-2.49, 14.30)  | NA   | Mod  | No | Serious   | Low   |
| Jenny Craig       | Dietary advice | 6.38 (-9.27, 22.10)   | Low fat        |      |         |      |           |       | 2.22 (-5.43, 9.78)   | 0.47 | High | No | Serious   | Mod   |
| Mediterranean     | Dietary advice | 6.95 (-1.40, 15.30)   | Usual diet     | Mod  | No      | Mod  | Serious   | Low   | 6.60 (0.63, 12.70)   | 0.91 | High | No | Serious   | Mod   |
| Ornish            | Dietary advice | 6.07 (-4.76, 17.00)   | Low fat        | Mod  | No      | Mod  | Serious   | Low   | 6.96 (-2.06, 16.20)  | 0.73 | Mod  | No | Serious   | Low   |
| Paleolithic       | Dietary advice | 9.36 (-5.89, 24.70)   | Low fat        | Mod  | No      | Mod  | V serious | V low | 9.36 (-5.89, 24.70)  | NA   | Mod  | No | V serious | V low |
| Portfolio         | Dietary advice | 23.39 (11.79, 34.95)  | Low fat        | Mod  | No      | Mod  | Serious   | Low   | 23.39 (11.79, 34.95) | NA   | Mod  | No | Serious   | Low   |
| Rosemary Conley   | Dietary advice | 9.25 (-3.09, 21.69)   | Usual diet     | Mod  | Serious | Low  | Serious   | V low | 9.25 (-3.09, 21.69)  | NA   | Low  | No | Serious   | V low |
| South Beach       | Dietary advice | 1.47 (-15.06, 17.98)  | Low fat        | Mod  | No      | Mod  | V serious | V low | 1.47 (-15.06, 17.98) | NA   | Mod  | No | V serious | V low |
| The Biggest Loser | Dietary advice | 6.01 (-5.14, 17.06)   | Usual diet     | Mod  | Serious | Low  | V serious | V low | 6.01 (-5.14, 17.06)  | NA   | Low  | No | V serious | V low |
| Volumetrics       | Dietary advice | 9.22 (-4.55, 22.99)   | Low fat        | Mod  | No      | Mod  | Serious   | Low   | 9.22 (-4.55, 22.99)  | NA   | Mod  | No | Serious   | Low   |
| Weight Watchers   | Dietary advice | 6.46 (-3.63, 16.70)   | Usual diet     | Mod  | No      | Mod  | Serious   | Low   | 3.01 (-4.22, 10.10)  | 0.33 | High | No | Serious   | Mod   |
| Zone              | Dietary advice | -0.78 (-7.65, 6.03)   | Low fat        | Mod  | No      | Mod  | V serious | V low | -0.78 (-7.65, 6.03)  | NA   | Mod  | No | V serious | V low |
| Atkins            | Low fat        | -8.61 (-20.00, 2.87)  | Zone           | Mod  | No      | Mod  | Serious   | Low   | -4.67 (-7.52, -1.87) | 0.48 | Mod  | No | Serious   | Low   |
| DASH              | Low fat        | 0.86(-8.33, 10.20)    | Usual diet     | High | No      | High | V serious | Low   | 2.01 (-6.39, 10.50)  | 0.54 | High | No | V serious | Low   |
| Jenny Craig       | Low fat        | -3.23 (-13.70, 7.39)  | Dietary advice |      |         |      |           |       | -1.72 (-10.10, 6.63) | 0.63 | High | No | V serious | Low   |
| Mediterranean     | Low fat        | -1.33 (-9.15, 6.70)   | Atkins         | Mod  | No      | Mod  | Serious   | Mod   | 2.67 (-2.40, 7.88)   | 0.11 | Mod  | No | Serious   | Low   |



|                   |         |                       |            |      |         |     |           |       |                       |      |      |    |           |       |
|-------------------|---------|-----------------------|------------|------|---------|-----|-----------|-------|-----------------------|------|------|----|-----------|-------|
| Ornish            | Low fat | 7.52 (-4.82, 19.80)   | Zone       |      |         |     |           |       | 3.03 (-4.92, 11.20)   | 0.45 | High | No | Serious   | Mod   |
| Paleolithic       | Low fat | NA                    |            |      |         |     |           |       | 5.40 (-8.81, 19.62)   | NA   | High | No | V serious | Low   |
| Portfolio         | Low fat | NA                    |            |      |         |     |           |       | 19.41 (9.28, 29.60)   | NA   | High | No | Serious   | Mod   |
| Rosemary Conley   | Low fat | 5.28 (-6.62, 17.24)   | Atkins     | Mod  | Serious | Low | Serious   | V low | 5.28 (-6.62, 17.24)   | NA   | Low  | No | Serious   | V low |
| South Beach       | Low fat | NA                    |            |      |         |     |           |       | -2.51 (-18.07, 13.07) | NA   | High | No | V serious | Low   |
| The Biggest Loser | Low fat | 2.02 (-8.72, 12.72)   | Usual diet | High | Serious | Mod | V serious | V low | 2.02 (-8.72, 12.72)   | NA   | Mod  | No | V serious | V low |
| Volumetric s      | Low fat | NA                    |            |      |         |     |           |       | 5.24 (-7.33, 17.81)   | NA   | High | No | V serious | Low   |
| Weight Watchers   | Low fat | -0.81 (-7.23, 5.60)   | Atkins     | Mod  | No      | Mod | V serious | V low | -0.81 (-7.23, 5.60)   | NA   | Mod  | No | V serious | V low |
| Zone              | Low fat | -0.32 (-15.40, 14.60) | Atkins     | Mod  | No      | Mod | V serious | V low | -4.78 (-9.54, 0.0192) | 0.49 | Mod  | No | Serious   | Low   |
| DASH              | Atkins  | 6.57 (-1.36, 14.48)   | Low fat    | Mod  | No      | Mod | Serious   | Low   | 6.57 (-1.36, 14.48)   | NA   | Mod  | No | Serious   | Low   |
| Jenny Craig       | Atkins  | 2.90 (-4.83, 10.65)   | Low fat    | Mod  | No      | Mod | Serious   | Low   | 2.90 (-4.83, 10.65)   | NA   | Mod  | No | Serious   | Low   |
| Mediterranean     | Atkins  | 7.77 (1.10, 14.60)    | Low fat    | Mod  | No      | Mod | Serious   | Low   | 7.34 (1.97, 12.90)    | 0.70 | Mod  | No | Serious   | Low   |
| Ornish            | Atkins  | 10.50 (-8.37, 29.40)  | Low fat    |      |         |     |           |       | 7.71 (-0.30, 16.00)   | 0.84 | High | No | Serious   | Mod   |
| Paleolithic       | Atkins  | 10.00 (-4.42, 24.44)  | Low fat    | Mod  | No      | Mod | Serious   | Low   | 10.00 (-4.42, 24.44)  | NA   | Mod  | No | Serious   | Low   |
| Portfolio         | Atkins  | 24.03 (13.60, 34.53)  | Low fat    | Mod  | No      | Mod | Serious   | Low   | 24.03 (13.60, 34.53)  | NA   | Mod  | No | Serious   | Low   |
| Rosemary Conley   | Atkins  | NA                    |            |      |         |     |           |       | 9.89 (-1.98, 21.83)   | NA   | Mod  | No | Serious   | Low   |
| South Beach       | Atkins  | 2.11 (-13.66, 17.89)  | Low fat    | Mod  | No      | Mod | V serious | V low | 2.11 (-13.66, 17.89)  | NA   | Mod  | No | V serious | V low |
| The Biggest Loser | Atkins  | 6.65 (-4.21, 17.48)   | Usual diet | High | Serious | Mod | Serious   | Low   | 6.65 (-4.21, 17.48)   | NA   | Mod  | No | Serious   | Low   |
| Volumetric s      | Atkins  | 9.86 (-2.97, 22.71)   | Low fat    | Mod  | No      | Mod | Serious   | Low   | 9.86 (-2.97, 22.71)   | NA   | Mod  | No | Serious   | Low   |
| Weight Watchers   | Atkins  | 1.54 (-8.17, 11.10)   | Usual diet | Mod  | No      | Mod | V serious | V low | 3.73 (-3.48, 10.90)   | 0.43 | Mod  | No | Serious   | Low   |

|                   |             |                       |                 |      |         |      |           |       |                       |      |      |    |           |       |
|-------------------|-------------|-----------------------|-----------------|------|---------|------|-----------|-------|-----------------------|------|------|----|-----------|-------|
| Zone              | Atkins      | -2.60 (-9.52, 4.32)   | Low fat         | Mod  | No      | Mod  | Serious   | Low   | -0.11 (-5.32, 5.18)   | 0.28 | High | No | Serious   | Mod   |
| Jenny Craig       | DASH        | -3.66 (-13.65, 6.39)  | Usual diet      | Mod  | No      | Mod  | V serious | V low | -3.66 (-13.65, 6.39)  | NA   | Mod  | No | V serious | V low |
| Mediterranean     | DASH        | 0.81 (-7.82, 9.39)    | Usual diet      | High | No      | High | V serious | Low   | 0.66 (-7.11, 8.46)    | 0.94 | High | No | V serious | Low   |
| Ornish            | DASH        | 0.91 (-9.28, 11.17)   | Low fat         | High | No      | High | V serious | Low   | 0.91 (-9.28, 11.17)   | NA   | High | No | V serious | Low   |
| Paleolithic       | DASH        | 3.44 (-12.62, 19.62)  | Low fat         | High | No      | High | Serious   | Mod   | 3.44 (-12.62, 19.62)  | NA   | High | No | V serious | Low   |
| Portfolio         | DASH        | 17.47 (4.66, 30.24)   | Low fat         | Mod  | No      | Mod  | No        | Low   | 17.47 (4.66, 30.24)   | NA   | Mod  | No | Serious   | Low   |
| Rosemary Conley   | DASH        | 3.35 (-10.07, 16.80)  | Usual diet      | Mod  | Serious | Low  | V serious | V low | 3.35 (-10.07, 16.80)  | NA   | Low  | No | V serious | V low |
| South Beach       | DASH        | -4.46 (-21.78, 12.91) | Low fat         | High | No      | High | V serious | Low   | -4.46 (-21.78, 12.91) | NA   | High | No | V serious | Low   |
| The Biggest Loser | DASH        | 0.09 (-11.55, 11.65)  | Usual diet      | High | Serious | Mod  | Serious   | Low   | 0.09 (-11.55, 11.65)  | NA   | Mod  | No | Serious   | Low   |
| Volumetrics       | DASH        | 3.32 (-11.48, 18.07)  | Low fat         | High | No      | High | V serious | Low   | 3.32 (-11.48, 18.07)  | NA   | High | No | V serious | Low   |
| Weight Watchers   | DASH        | -2.76 (-11.60, 6.09)  | Usual diet      | Mod  | No      | Mod  | V serious | V low | -2.76 (-11.60, 6.09)  | NA   | Mod  | No | V serious | V low |
| Zone              | DASH        | -6.72 (-15.47, 2.11)  | Low fat         | Mod  | No      | Mod  | Serious   | Low   | -6.72 (-15.47, 2.11)  | NA   | Mod  | No | Serious   | Low   |
| Mediterranean     | Jenny Craig | 4.28 (-3.45, 12.00)   | Dietary advice  | Mod  | No      | Mod  | Serious   | Low   | 4.28 (-3.45, 12.00)   | NA   | Mod  | No | Serious   | Low   |
| Ornish            | Jenny Craig | 4.57 (-5.29, 14.43)   | Low fat         | High | No      | High | V serious | Low   | 4.57 (-5.29, 14.43)   | NA   | High | No | V serious | Low   |
| Paleolithic       | Jenny Craig | 7.09 (-8.98, 23.16)   | Low fat         | High | No      | High | V serious | Low   | 7.09 (-8.98, 23.16)   | NA   | High | No | V serious | Low   |
| Portfolio         | Jenny Craig | 21.13 (8.48, 33.75)   | Low fat         | Mod  | No      | Mod  | Serious   | Low   | 21.13 (8.48, 33.75)   | NA   | Mod  | No | Serious   | Low   |
| Rosemary Conley   | Jenny Craig | 7.00 (-6.52, 20.53)   | Atkins, Low fat | Mod  | Serious | Low  | V serious | V low | 7.00 (-6.52, 20.53)   | NA   | Low  | No | V serious | V low |
| South Beach       | Jenny Craig | -0.81 (-18.03, 16.43) | Low fat         | High | No      | High | V serious | Low   | -0.81 (-18.03, 16.43) | NA   | High | No | V serious | Low   |
| The Biggest Loser | Jenny Craig | 3.74 (-8.68, 16.07)   | Usual diet      | High | Serious | Mod  | V serious | V low | 3.74 (-8.68, 16.07)   | NA   | Mod  | No | V serious | V low |
| Volumetrics       | Jenny Craig | 6.94 (-7.72, 21.60)   | Low fat         | High | No      | High | V serious | Low   | 6.94 (-7.72, 21.60)   | NA   | High | No | V serious | Low   |

|                   |               |                       |                     |      |         |      |           |       |                       |      |      |    |           |       |
|-------------------|---------------|-----------------------|---------------------|------|---------|------|-----------|-------|-----------------------|------|------|----|-----------|-------|
| Weight Watchers   | Jenny Craig   | 2.51 (-8.32, 13.30)   | Dietary advice      | High | No      | High | V serious | Low   | 0.79 (-8.51, 10.00)   | 0.42 | High | No | V serious | Low   |
| Zone              | Jenny Craig   | -3.06 (-11.60, 5.49)  | Low fat             | Mod  | No      | Mod  | V serious | V low | -3.06 (-11.60, 5.49)  | NA   | Mod  | No | V serious | V low |
| Ornish            | Mediterranean | 0.30 (-7.76, 8.38)    | Low fat             | Mod  | No      | Mod  | V serious | V low | 0.30 (-7.76, 8.38)    | NA   | Mod  | No | V serious | V low |
| Paleolithic       | Mediterranean | 2.83 (-12.04, 17.72)  | Low fat             | Mod  | No      | Mod  | V serious | V low | 2.83 (-12.04, 17.72)  | NA   | Mod  | No | V serious | V low |
| Portfolio         | Mediterranean | 16.85 (5.74, 27.92)   | Low fat             | Mod  | No      | Mod  | Serious   | Low   | 16.85 (5.74, 27.92)   | NA   | Mod  | No | Serious   | Low   |
| Rosemary Conley   | Mediterranean | 2.73 (-9.28, 14.71)   | Usual diet          | Mod  | Serious | Low  | V serious | V low | 2.73 (-9.28, 14.71)   | NA   | Low  | No | V serious | V low |
| South Beach       | Mediterranean | -5.06 (-21.28, 11.11) | Low fat             | Mod  | No      | Mod  | V serious | V low | -5.06 (-21.28, 11.11) | NA   | Mod  | No | V serious | V low |
| The Biggest Loser | Mediterranean | -0.52 (-10.79, 9.63)  | Usual diet          | High | Serious | Mod  | V serious | V low | -0.52 (-10.79, 9.63)  | NA   | Mod  | No | V serious | V low |
| Volumetrics       | Mediterranean | 2.69 (-10.71, 15.98)  | Low fat             | Mod  | No      | Mod  | V serious | V low | 2.69 (-10.71, 15.98)  | NA   | Mod  | No | V serious | V low |
| Weight Watchers   | Mediterranean | -3.36 (-9.77, 2.99)   | Usual diet          | Mod  | No      | Mod  | Serious   | Low   | -3.36 (-9.77, 2.99)   | NA   | Mod  | No | Serious   | Low   |
| Zone              | Mediterranean | -7.32 (-13.47, -1.24) | Low fat             | Mod  | No      | Mod  | Serious   | Low   | -7.32 (-13.47, -1.24) | NA   | Mod  | No | Serious   | Low   |
| Paleolithic       | Ornish        | 2.52 (-13.41, 18.48)  | Low fat             | High | No      | High | V serious | Low   | 2.52 (-13.41, 18.48)  | NA   | High | No | V serious | Low   |
| Portfolio         | Ornish        | 16.57 (4.14, 28.94)   | Low fat             | Mod  | No      | Mod  | Serious   | Low   | 16.57 (4.14, 28.94)   | NA   | Mod  | No | Serious   | Low   |
| Rosemary Conley   | Ornish        | 2.45 (-11.20, 16.03)  | Atkins              | Mod  | Serious | Low  | V serious | V low | 2.45 (-11.20, 16.03)  | NA   | Low  | No | V serious | V low |
| South Beach       | Ornish        | -5.36 (-22.58, 11.79) | Low fat             | High | No      | High | V serious | Low   | -5.36 (-22.58, 11.79) | NA   | High | No | V serious | Low   |
| The Biggest Loser | Ornish        | -0.83 (-13.51, 11.74) | Low fat, Usual diet | High | Serious | Mod  | V serious | V low | -0.83 (-13.51, 11.74) | NA   | Mod  | No | V serious | V low |
| Volumetrics       | Ornish        | 2.37 (-12.12, 16.84)  | Low fat             | High | No      | High | V serious | Low   | 2.37 (-12.12, 16.84)  | NA   | High | No | V serious | Low   |
| Weight Watchers   | Ornish        | -1.58 (-13.40, 9.97)  | Atkins              | Mod  | No      | Mod  | V serious | V low | -3.97 (-13.90, 5.70)  | 0.42 | High | No | V serious | Low   |
| Zone              | Ornish        | -12.60 (-31.90, 6.65) |                     |      |         |      |           |       | -7.80 (-16.40, -0.60) | 0.52 | High | No | Serious   | Mod   |
| Portfolio         | Paleolithic   | 14.00 (-3.46, 31.43)  | Low fat             | Mod  | No      | Mod  | Serious   | Low   | 14.00 (-3.46, 31.43)  | NA   | Mod  | No | Serious   | Low   |

|                   |                 |                         |                     |      |         |      |           |       |                         |    |      |    |           |       |
|-------------------|-----------------|-------------------------|---------------------|------|---------|------|-----------|-------|-------------------------|----|------|----|-----------|-------|
| Rosemary Conley   | Paleolithic     | -0.09 (-18.72, 18.38)   | Low fat, Atkins     | Mod  | No      | Mod  | V serious | Low   | -0.09 (-18.72, 18.38)   | NA | Mod  | No | V serious | V low |
| South Beach       | Paleolithic     | -7.91 (-28.96, 13.10)   | Low fat             | High | No      | High | V serious | Mod   | -7.91 (-28.96, 13.10)   | NA | High | No | V serious | Low   |
| The Biggest Loser | Paleolithic     | -3.35 (-21.22, 14.43)   | Low fat, Usual diet | High | No      | High | V serious | Mod   | -3.35 (-21.22, 14.43)   | NA | High | No | V serious | Low   |
| Volumetric s      | Paleolithic     | -0.16 (-19.08, 18.71)   | Low fat             | High | No      | High | V serious | Mod   | -0.16 (-19.08, 18.71)   | NA | High | No | V serious | Low   |
| Weight Watchers   | Paleolithic     | -6.20 (-21.80, 9.33)    | Low fat, Atkins     | Mod  | No      | Mod  | V serious | Low   | -6.20 (-21.80, 9.33)    | NA | Mod  | No | V serious | V low |
| Zone              | Paleolithic     | -10.18 (-25.01, 4.69)   | Low fat             | Mod  | No      | Mod  | Serious   | Low   | -10.18 (-25.01, 4.69)   | NA | Mod  | No | Serious   | Low   |
| Rosemary Conley   | Portfolio       | -14.13 (-29.73, 1.53)   | Low fat, Atkins     | Mod  | No      | Mod  | Serious   | Low   | -14.13 (-29.73, 1.53)   | NA | Mod  | No | Serious   | Low   |
| South Beach       | Portfolio       | -21.93 (-40.45, -3.32)  | Low fat             | Mod  | No      | Mod  | Serious   | Low   | -21.93 (-40.45, -3.32)  | NA | High | No | Serious   | Mod   |
| The Biggest Loser | Portfolio       | -17.39 (-32.15, -2.65)  | Low fat, Usual diet | Mod  | Serious | Low  | Serious   | V low | -17.39 (-32.15, -2.65)  | NA | Low  | No | Serious   | V low |
| Volumetric s      | Portfolio       | -14.17 (-30.37, 1.94)   | Low fat             | Mod  | No      | Mod  | Serious   | Low   | -14.17 (-30.37, 1.94)   | NA | Mod  | No | Serious   | Low   |
| Weight Watchers   | Portfolio       | -20.22 (-32.21, -8.21)  | Low fat, Atkins     | Mod  | No      | Mod  | V serious | V low | -20.22 (-32.21, -8.21)  | NA | Mod  | No | V serious | V low |
| Zone              | Portfolio       | -24.18 (-35.26, -13.19) | Low fat             | Mod  | No      | Mod  | V serious | V low | -24.18 (-35.26, -13.19) | NA | Mod  | No | V serious | V low |
| South Beach       | Rosemary Conley | -7.81 (-27.35, 11.76)   | Low fat, Atkins     | Mod  | No      | Mod  | V serious | V low | -7.81 (-27.35, 11.76)   | NA | Mod  | No | Serious   | Low   |
| The Biggest Loser | Rosemary Conley | -3.26 (-18.53, 11.98)   | Usual diet          | Mod  | Serious | Low  | V serious | V low | -3.26 (-18.53, 11.98)   | NA | Low  | No | Serious   | V low |
| Volumetric s      | Rosemary Conley | -0.05 (-17.38, 17.25)   | Low fat, Atkins     | Mod  | No      | Mod  | V serious | V low | -0.05 (-17.38, 17.25)   | NA | Mod  | No | Serious   | Low   |
| Weight Watchers   | Rosemary Conley | NA                      |                     |      |         |      |           |       | -6.10 (-18.06, 5.81)    | NA | Mod  | No | Serious   | Low   |
| Zone              | Rosemary Conley | -10.04 (-22.64, 2.51)   | Atkins              | Mod  | Serious | Low  | Serious   | V low | -10.04 (-22.64, 2.51)   | NA | Low  | No | Serious   | V low |
| The Biggest Loser | South Beach     | 4.54 (-14.34, 23.45)    | Low fat, Usual diet | High | No      | High | V serious | Low   | 4.54 (-14.34, 23.45)    | NA | High | No | V serious | Low   |
| Volumetric s      | South Beach     | 7.75 (-12.26, 27.82)    | Low fat             | High | No      | High | V serious | Low   | 7.75 (-12.26, 27.82)    | NA | High | No | V serious | Low   |

|                 |                   |                       |                     |      |         |      |           |       |                       |      |      |    |           |       |
|-----------------|-------------------|-----------------------|---------------------|------|---------|------|-----------|-------|-----------------------|------|------|----|-----------|-------|
| Weight Watchers | South Beach       | 1.72 (-15.13, 18.49)  | Low fat, Atkins     | Mod  | No      | Mod  | V serious | V low | 1.72 (-15.13, 18.49)  | NA   | Mod  | No | V serious | V low |
| Zone            | South Beach       | -2.26 (-18.43, 13.92) | Low fat             | Mod  | No      | Mod  | V serious | V low | -2.26 (-18.43, 13.92) | NA   | Mod  | No | V serious | V low |
| Volumetrics     | The Biggest Loser | 3.22 (-13.29, 19.69)  | Low fat, Usual diet | High | No      | High | V serious | Low   | 3.22 (-13.29, 19.69)  | NA   | High | No | V serious | Low   |
| Weight Watchers | The Biggest Loser | -2.83 (-14.22, 8.51)  | Usual diet          | Mod  | Serious | Low  | V serious | V low | -2.83 (-14.22, 8.51)  | NA   | Low  | No | V serious | V low |
| Zone            | The Biggest Loser | -6.79 (-18.27, 4.70)  | Low fat, Usual diet | Mod  | Serious | Low  | Serious   | V low | -6.79 (-18.27, 4.70)  | NA   | Low  | No | V serious | V low |
| Weight Watchers | Volumetrics       | -6.05 (-20.17, 8.04)  | Low fat, Atkins     | Mod  | No      | Mod  | V serious | V low | -6.05 (-20.17, 8.04)  | NA   | Mod  | No | V serious | V low |
| Zone            | Volumetrics       | -10.00 (-23.33, 3.33) | Low fat             | Mod  | No      | Mod  | Serious   | Low   | -10.00 (-23.33, 3.33) | NA   | Mod  | No | Serious   | Low   |
| Zone            | Weight Watchers   | -5.15 (-14.70, 4.37)  | Atkins              | Mod  | No      | Mod  | Serious   | Low   | -3.84 (-11.90, 4.34)  | 0.56 | High | No | Serious   | Mod   |

Table S33: GRADE assessment for 6-month HDL reduction in individual popular diets NMA

| Arm 1             | Arm 2 (Ref)    | No. of study | No. of patients | I-square, % | MD (95%CrI)          | RoB     | Inconsistency | Indirectness | Publication bias | Direct rating without imprecision | Imprecision | Direct rating with imprecision | Direct is more precise than indirect? | Need to rate indirect? |
|-------------------|----------------|--------------|-----------------|-------------|----------------------|---------|---------------|--------------|------------------|-----------------------------------|-------------|--------------------------------|---------------------------------------|------------------------|
| Dietary advice    | Usual diet     | 2            | 113             | 0.0         | -1.35 (-6.07, 3.40)  | Serious | No            | No           | Undetected       | Mod                               | Serious     | Low                            | No                                    | Yes                    |
| Low fat           | Usual diet     | 2            | 201             | 0.0         | -3.37 (-7.03, 0.31)  | Serious | No            | No           | Undetected       | Mod                               | Serious     | Low                            | No                                    | Yes                    |
| Atkins            | Usual diet     | 1            | 70              | NA          | 2.68 (-4.31, 9.68)   | Serious | No            | No           | Undetected       | Mod                               | V serious   | V low                          | No                                    | Yes                    |
| DASH              | Usual diet     | 4            | 428             | 57.4        | -1.62 (-4.57, 1.41)  | No      | Serious       | No           | Undetected       | Mod                               | Serious     | Low                            | Yes                                   | Yes                    |
| Jenny Craig       | Usual diet     | 1            | 47              | NA          | -1.36 (-10.0, 7.31)  | No      | No            | No           | Undetected       | High                              | V serious   | Low                            | No                                    | Yes                    |
| Mediterranean     | Usual diet     | 8            | 997             | 52.5        | -0.30 (-2.18, 1.44)  | No      | Serious       | No           | Undetected       | Mod                               | Serious     | Low                            | Yes                                   | Yes                    |
| Ornish            | Usual diet     |              |                 |             |                      |         |               |              |                  |                                   |             |                                |                                       |                        |
| Paleolithic       | Usual diet     |              |                 |             |                      |         |               |              |                  |                                   |             |                                |                                       |                        |
| Portfolio         | Usual diet     |              |                 |             |                      |         |               |              |                  |                                   |             |                                |                                       |                        |
| Rosemary Conley   | Usual diet     | 1            | 78              | NA          | -1.95 (-8.00, 4.10)  | Serious | No            | No           | Undetected       | Mod                               | V serious   | V low                          | NA                                    | NA                     |
| South Beach       | Usual diet     |              |                 |             |                      |         |               |              |                  |                                   |             |                                |                                       |                        |
| The Biggest Loser | Usual diet     | 1            | 260             | NA          | -0.02 (-1.23, 1.19)  | No      | No            | No           | Undetected       | High                              | Serious     | Mod                            | NA                                    | NA                     |
| Volumetrics       | Usual diet     |              |                 |             |                      |         |               |              |                  |                                   |             |                                |                                       |                        |
| Weight Watchers   | Usual diet     | 3            | 578             | 0.0         | -1.94 (-5.10, 1.35)  | Serious | No            | No           | Undetected       | Mod                               | Serious     | Low                            | Yes                                   | Yes                    |
| Zone              | Usual diet     |              |                 |             |                      |         |               |              |                  |                                   |             |                                |                                       |                        |
| Low fat           | Dietary advice | 1            | 98              | NA          | -2.32 (-4.28, -0.37) | Serious | No            | No           | Undetected       | Mod                               | Serious     | Low                            | Yes                                   | Yes                    |
| Atkins            | Dietary advice |              |                 |             |                      |         |               |              |                  |                                   |             |                                |                                       |                        |
| DASH              | Dietary advice |              |                 |             |                      |         |               |              |                  |                                   |             |                                |                                       |                        |
| Jenny Craig       | Dietary advice | 3            | 551             | 0.0         | -2.67 (-5.99, 0.84)  | No      | No            | No           | Undetected       | High                              | Serious     | Mod                            | Yes                                   | No                     |
| Mediterranean     | Dietary advice | 3            | 257             | 96.4        | 1.89 (-1.17, 4.69)   | No      | Serious       | No           | Undetected       | Mod                               | Serious     | Low                            | No                                    | Yes                    |
| Ornish            | Dietary advice | 1            | 30              | NA          | -2.79 (-5.78, 0.20)  | No      | No            | Serious      | Undetected       | Mod                               | Serious     | Low                            | Yes                                   | Yes                    |
| Paleolithic       | Dietary advice |              |                 |             |                      |         |               |              |                  |                                   |             |                                |                                       |                        |
| Portfolio         | Dietary advice |              |                 |             |                      |         |               |              |                  |                                   |             |                                |                                       |                        |

|                   |                |    |      |      |                       |         |         |         |            |      |           |       |     |     |
|-------------------|----------------|----|------|------|-----------------------|---------|---------|---------|------------|------|-----------|-------|-----|-----|
| Rosemary Conley   | Dietary advice |    |      |      |                       |         |         |         |            |      |           |       |     |     |
| South Beach       | Dietary advice |    |      |      |                       |         |         |         |            |      |           |       |     |     |
| The Biggest Loser | Dietary advice |    |      |      |                       |         |         |         |            |      |           |       |     |     |
| Volumetrics       | Dietary advice |    |      |      |                       |         |         |         |            |      |           |       |     |     |
| Weight Watchers   | Dietary advice | 3  | 542  | 93.6 | 1.71 (-1.04, 4.29)    | No      | No      | No      | Undetected | High | Serious   | Mod   | Yes | No  |
| Zone              | Dietary advice |    |      |      |                       |         |         |         |            |      |           |       |     |     |
| Atkins            | Low fat        | 30 | 2717 | 63.6 | 3.76 (2.74, 4.82)     | No      | Serious | No      | Undetected | Mod  | No        | Mod   | Yes | Yes |
| DASH              | Low fat        | 1  | 54   | NA   | -2.31 (-6.75, 2.13)   | No      | No      | No      | Undetected | High | V serious | Low   | No  | Yes |
| Jenny Craig       | Low fat        | 1  | 227  | NA   | 2.01 (-1.06, 5.08)    | No      | No      | No      | Undetected | High | Serious   | Mod   | Yes | No  |
| Mediterranean     | Low fat        | 4  | 493  | 0.0  | 0.37 (-2.36, 3.14)    | No      | No      | No      | Undetected | High | Serious   | Mod   | No  | Yes |
| Ornish            | Low fat        | 1  | 127  | NA   | -2.11 (-6.03, 1.82)   | No      | No      | No      | Undetected | High | Serious   | Mod   | No  | Yes |
| Paleolithic       | Low fat        | 1  | 61   | NA   | -0.39 (-5.24, 4.46)   | No      | No      | No      | Undetected | High | V serious | Low   | NA  | NA  |
| Portfolio         | Low fat        | 1  | 345  | NA   | -1.13 (-3.91, 1.65)   | No      | No      | No      | Undetected | High | Serious   | Mod   | NA  | NA  |
| Rosemary Conley   | Low fat        |    |      |      |                       |         |         |         |            |      |           |       |     |     |
| South Beach       | Low fat        | 1  | 45   | NA   | 2.50 (-2.20, 7.19)    | No      | No      | No      | Undetected | High | Serious   | Mod   | NA  | NA  |
| The Biggest Loser | Low fat        |    |      |      |                       |         |         |         |            |      |           |       |     |     |
| Volumetrics       | Low fat        | 1  | 71   | NA   | 2.0 (-0.97, 4.97)     | No      | No      | No      | Undetected | High | Serious   | Mod   | NA  | NA  |
| Weight Watchers   | Low fat        |    |      |      |                       |         |         |         |            |      |           |       |     |     |
| Zone              | Low fat        | 10 | 634  | 36.7 | 1.74 (-0.18, 3.61)    | No      | Serious | No      | Undetected | Mod  | Serious   | Low   | Yes | Yes |
| DASH              | Atkins         |    |      |      |                       |         |         |         |            |      |           |       |     |     |
| Jenny Craig       | Atkins         |    |      |      |                       |         |         |         |            |      |           |       |     |     |
| Mediterranean     | Atkins         | 1  | 173  | NA   | -2.80 (-3.02, -2.58)  | No      | No      | Serious | Undetected | Mod  | Serious   | Low   | Yes | Yes |
| Ornish            | Atkins         | 2  | 177  | 12.5 | -7.04 (-12.00, -2.19) | No      | No      | No      | Undetected | High | Serious   | Mod   | Yes | No  |
| Paleolithic       | Atkins         |    |      |      |                       |         |         |         |            |      |           |       |     |     |
| Portfolio         | Atkins         |    |      |      |                       |         |         |         |            |      |           |       |     |     |
| Rosemary Conley   | Atkins         | 1  | 74   | NA   | -4.64 (-13.30, 4.03)  | Serious | No      | No      | Undetected | Mod  | V serious | V low | NA  | NA  |
| South Beach       | Atkins         |    |      |      |                       |         |         |         |            |      |           |       |     |     |

|                   |               |   |     |     |                     |    |    |         |            |      |           |       |    |     |  |
|-------------------|---------------|---|-----|-----|---------------------|----|----|---------|------------|------|-----------|-------|----|-----|--|
| The Biggest Loser | Atkins        |   |     |     |                     |    |    |         |            |      |           |       |    |     |  |
| Volumetrics       | Atkins        |   |     |     |                     |    |    |         |            |      |           |       |    |     |  |
| Weight Watchers   | Atkins        | 2 | 131 | 0.0 | -3.84 (-8.77, 1.12) | No | No | No      | Undetected | High | Serious   | Mod   | No | Yes |  |
| Zone              | Atkins        | 3 | 239 | 0.0 | -2.06 (-5.98, 1.85) | No | No | No      | Undetected | High | Serious   | Mod   | No | Yes |  |
| Jenny Craig       | DASH          |   |     |     |                     |    |    |         |            |      |           |       |    |     |  |
| Mediterranean     | DASH          | 1 | 95  | NA  | 0.00 (-4.04, 4.04)  | No | No | Serious | Undetected | Mod  | V serious | V low | No | Yes |  |
| Ornish            | DASH          |   |     |     |                     |    |    |         |            |      |           |       |    |     |  |
| Paleolithic       | DASH          |   |     |     |                     |    |    |         |            |      |           |       |    |     |  |
| Portfolio         | DASH          |   |     |     |                     |    |    |         |            |      |           |       |    |     |  |
| Rosemary Conley   | DASH          |   |     |     |                     |    |    |         |            |      |           |       |    |     |  |
| South Beach       | DASH          |   |     |     |                     |    |    |         |            |      |           |       |    |     |  |
| The Biggest Loser | DASH          |   |     |     |                     |    |    |         |            |      |           |       |    |     |  |
| Volumetrics       | DASH          |   |     |     |                     |    |    |         |            |      |           |       |    |     |  |
| Weight Watchers   | DASH          |   |     |     |                     |    |    |         |            |      |           |       |    |     |  |
| Zone              | DASH          |   |     |     |                     |    |    |         |            |      |           |       |    |     |  |
| Mediterranean     | Jenny Craig   |   |     |     |                     |    |    |         |            |      |           |       |    |     |  |
| Ornish            | Jenny Craig   |   |     |     |                     |    |    |         |            |      |           |       |    |     |  |
| Paleolithic       | Jenny Craig   |   |     |     |                     |    |    |         |            |      |           |       |    |     |  |
| Portfolio         | Jenny Craig   |   |     |     |                     |    |    |         |            |      |           |       |    |     |  |
| Rosemary Conley   | Jenny Craig   |   |     |     |                     |    |    |         |            |      |           |       |    |     |  |
| South Beach       | Jenny Craig   |   |     |     |                     |    |    |         |            |      |           |       |    |     |  |
| The Biggest Loser | Jenny Craig   |   |     |     |                     |    |    |         |            |      |           |       |    |     |  |
| Volumetrics       | Jenny Craig   |   |     |     |                     |    |    |         |            |      |           |       |    |     |  |
| Weight Watchers   | Jenny Craig   | 1 | 56  | NA  | 3.41 (-5.25, 12.10) | No | No | No      | Undetected | High | V serious | Low   | No | Yes |  |
| Zone              | Jenny Craig   |   |     |     |                     |    |    |         |            |      |           |       |    |     |  |
| Ornish            | Mediterranean |   |     |     |                     |    |    |         |            |      |           |       |    |     |  |
| Paleolithic       | Mediterranean |   |     |     |                     |    |    |         |            |      |           |       |    |     |  |



|                   |               |   |     |     |                     |    |    |    |            |      |           |     |    |     |  |
|-------------------|---------------|---|-----|-----|---------------------|----|----|----|------------|------|-----------|-----|----|-----|--|
| Portfolio         | Mediterranean |   |     |     |                     |    |    |    |            |      |           |     |    |     |  |
| Rosemary Conley   | Mediterranean |   |     |     |                     |    |    |    |            |      |           |     |    |     |  |
| South Beach       | Mediterranean |   |     |     |                     |    |    |    |            |      |           |     |    |     |  |
| The Biggest Loser | Mediterranean |   |     |     |                     |    |    |    |            |      |           |     |    |     |  |
| Volumetrics       | Mediterranean |   |     |     |                     |    |    |    |            |      |           |     |    |     |  |
| Weight Watchers   | Mediterranean |   |     |     |                     |    |    |    |            |      |           |     |    |     |  |
| Zone              | Mediterranean |   |     |     |                     |    |    |    |            |      |           |     |    |     |  |
| Paleolithic       | Ornish        |   |     |     |                     |    |    |    |            |      |           |     |    |     |  |
| Portfolio         | Ornish        |   |     |     |                     |    |    |    |            |      |           |     |    |     |  |
| Rosemary Conley   | Ornish        |   |     |     |                     |    |    |    |            |      |           |     |    |     |  |
| South Beach       | Ornish        |   |     |     |                     |    |    |    |            |      |           |     |    |     |  |
| The Biggest Loser | Ornish        |   |     |     |                     |    |    |    |            |      |           |     |    |     |  |
| Volumetrics       | Ornish        |   |     |     |                     |    |    |    |            |      |           |     |    |     |  |
| Weight Watchers   | Ornish        | 1 | 51  | NA  | 6.01 (-1.95, 14.00) | No | No | No | Undetected | High | V serious | Low | No | Yes |  |
| Zone              | Ornish        | 2 | 176 | 0.0 | 4.21 (-0.56, 9.04)  | No | No | No | Undetected | High | Serious   | Mod | No | Yes |  |
| Portfolio         | Paleolithic   |   |     |     |                     |    |    |    |            |      |           |     |    |     |  |
| Rosemary Conley   | Paleolithic   |   |     |     |                     |    |    |    |            |      |           |     |    |     |  |
| South Beach       | Paleolithic   |   |     |     |                     |    |    |    |            |      |           |     |    |     |  |
| The Biggest Loser | Paleolithic   |   |     |     |                     |    |    |    |            |      |           |     |    |     |  |
| Volumetrics       | Paleolithic   |   |     |     |                     |    |    |    |            |      |           |     |    |     |  |
| Weight Watchers   | Paleolithic   |   |     |     |                     |    |    |    |            |      |           |     |    |     |  |
| Zone              | Paleolithic   |   |     |     |                     |    |    |    |            |      |           |     |    |     |  |
| Rosemary Conley   | Portfolio     |   |     |     |                     |    |    |    |            |      |           |     |    |     |  |
| South Beach       | Portfolio     |   |     |     |                     |    |    |    |            |      |           |     |    |     |  |
| The Biggest Loser | Portfolio     |   |     |     |                     |    |    |    |            |      |           |     |    |     |  |
| Volumetrics       | Portfolio     |   |     |     |                     |    |    |    |            |      |           |     |    |     |  |
| Weight Watchers   | Portfolio     |   |     |     |                     |    |    |    |            |      |           |     |    |     |  |

|                   |                   |   |    |    |                     |         |    |    |            |      |           |       |    |     |
|-------------------|-------------------|---|----|----|---------------------|---------|----|----|------------|------|-----------|-------|----|-----|
| Zone              | Portfolio         |   |    |    |                     |         |    |    |            |      |           |       |    |     |
| South Beach       | Rosemary Conley   |   |    |    |                     |         |    |    |            |      |           |       |    |     |
| The Biggest Loser | Rosemary Conley   |   |    |    |                     |         |    |    |            |      |           |       |    |     |
| Volumetrics       | Rosemary Conley   |   |    |    |                     |         |    |    |            |      |           |       |    |     |
| Weight Watchers   | Rosemary Conley   | 1 | 87 | NA | 0.78 (-4.65, 6.21)  | Serious | No | No | Undetected | Mod  | V serious | V low | NA | NA  |
| Zone              | Rosemary Conley   |   |    |    |                     |         |    |    |            |      |           |       |    |     |
| The Biggest Loser | South Beach       |   |    |    |                     |         |    |    |            |      |           |       |    |     |
| Volumetrics       | South Beach       |   |    |    |                     |         |    |    |            |      |           |       |    |     |
| Weight Watchers   | South Beach       |   |    |    |                     |         |    |    |            |      |           |       |    |     |
| Zone              | South Beach       |   |    |    |                     |         |    |    |            |      |           |       |    |     |
| Volumetrics       | The Biggest Loser |   |    |    |                     |         |    |    |            |      |           |       |    |     |
| Weight Watchers   | The Biggest Loser |   |    |    |                     |         |    |    |            |      |           |       |    |     |
| Zone              | The Biggest Loser |   |    |    |                     |         |    |    |            |      |           |       |    |     |
| Weight Watchers   | Volumetrics       |   |    |    |                     |         |    |    |            |      |           |       |    |     |
| Zone              | Volumetrics       |   |    |    |                     |         |    |    |            |      |           |       |    |     |
| Zone              | Weight Watchers   | 1 | 56 | NA | 2.30 (-7.17, 11.80) | No      | No | No | Undetected | High | V serious | Low   | No | Yes |

Table S33 continued: GRADE assessment for 6-month HDL reduction in individual popular diets NMA

| Comparison groups |             | Indirect evidence    |                                           |                      |                |                                     |             |                                  | Network evidence     |                      |                                                          |             |                 |                      |
|-------------------|-------------|----------------------|-------------------------------------------|----------------------|----------------|-------------------------------------|-------------|----------------------------------|----------------------|----------------------|----------------------------------------------------------|-------------|-----------------|----------------------|
| Arm 1             | Arm 2 (Ref) | MD (95%CrI)          | First order loop of the most contribution | Low est of C1 and C2 | Intransitivity | Indirect rating without imprecision | Imprecision | Indirect rating with imprecision | MD (95%CrI)          | Incoherence, P-value | Higher rating of direct and indirect without imprecision | Incoherence | NMA Imprecision | Final network rating |
| Dietary advice    | Usual diet  | -2.04 (-4.45, 0.45)  | Mediterranean                             | Mod                  | No             | Mod                                 | Serious     | Low                              | -1.71 (-3.72, 0.37)  | 0.750                | Mod                                                      | No          | Serious         | Low                  |
| Low fat           | Usual diet  | -1.53 (-3.89, 0.81)  | Mediterranean                             | Mod                  | No             | Mod                                 | Serious     | Low                              | -2.13 (-4.02, -0.17) | 0.392                | Mod                                                      | No          | Serious         | Low                  |
| Atkins            | Usual diet  | 1.66 (-0.52, 3.89)   | Low fat                                   | Mod                  | No             | Mod                                 | Serious     | Low                              | 1.79 (-0.22, 3.85)   | 0.740                | Mod                                                      | No          | Serious         | Low                  |
| DASH              | Usual diet  | -2.51 (-6.78, 1.71)  | Mediterranean                             | Mod                  | No             | Mod                                 | Serious     | Low                              | -1.90 (-4.33, 0.56)  | 0.723                | Mod                                                      | No          | Serious         | Low                  |
| Jenny Craig       | Usual diet  | -3.00 (-6.47, 0.51)  | Dietary advice                            | Mod                  | No             | Mod                                 | Serious     | Low                              | -2.85 (-5.86, 0.25)  | 0.694                | High                                                     | No          | Serious         | Mod                  |
| Mediterranean     | Usual diet  | -1.21 (-4.03, 1.66)  | Low fat                                   | Mod                  | No             | Mod                                 | Serious     | Low                              | -0.61 (-2.15, 0.87)  | 0.626                | Mod                                                      | No          | Serious         | Low                  |
| Ornish            | Usual diet  | -4.87 (-7.97, -1.77) | Low fat                                   | Mod                  | No             | Mod                                 | Serious     | Low                              | -4.87 (-7.97, -1.77) | NA                   | Mod                                                      | No          | Serious         | Low                  |
| Paleolithic       | Usual diet  | -2.52 (-8.85, 3.83)  | Low fat                                   | Mod                  | No             | Mod                                 | V serious   | V low                            | -2.52 (-8.85, 3.83)  | NA                   | Mod                                                      | No          | V serious       | V low                |
| Portfolio         | Usual diet  | -3.26 (-8.17, 1.68)  | Low fat                                   | Mod                  | Serious        | Low                                 | Serious     | V low                            | -3.26 (-8.17, 1.68)  | NA                   | Low                                                      | No          | Serious         | V low                |
| Rosemary Conley   | Usual diet  | NA                   |                                           |                      |                |                                     |             |                                  | -2.04 (-6.87, 2.81)  | NA                   | Mod                                                      | No          | V serious       | V low                |
| South Beach       | Usual diet  | 0.36 (-5.85, 6.55)   | Low fat                                   | Mod                  | No             | Mod                                 | V serious   | V low                            | 0.36 (-5.85, 6.55)   | NA                   | Mod                                                      | No          | V serious       | V low                |
| The Biggest Loser | Usual diet  | NA                   |                                           |                      |                |                                     |             |                                  | -0.01 (-3.82, 3.81)  | NA                   | High                                                     | No          | Serious         | Mod                  |
| Volumetrics       | Usual diet  | -0.13 (-5.18, 4.92)  | Low fat                                   | Mod                  | No             | Mod                                 | V serious   | V low                            | -0.13 (-5.18, 4.92)  | NA                   | Mod                                                      | No          | V serious       | V low                |
| Weight Watchers   | Usual diet  | 0.01 (-3.43, 3.32)   | Dietary advice                            | Mod                  | No             | Mod                                 | V serious   | V low                            | -0.88 (-3.11, 1.32)  | 0.497                | Mod                                                      | No          | Serious         | Low                  |
| Zone              | Usual diet  | -0.33 (-2.84, 2.19)  | Low fat                                   | Mod                  | No             | Mod                                 | Serious     | Low                              | -0.33 (-2.84, 2.19)  | NA                   | Mod                                                      | No          | Serious         | Low                  |

|                   |                |                     |                 |     |         |     |           |       |                      |       |      |    |           |       |
|-------------------|----------------|---------------------|-----------------|-----|---------|-----|-----------|-------|----------------------|-------|------|----|-----------|-------|
| Low fat           | Dietary advice | 0.26 (-2.20, 2.62)  | Mediterranean   | Mod | No      | Mod | Serious   | Low   | -0.42 (-2.47, 1.62)  | 0.271 | Mod  | No | Serious   | Low   |
| Atkins            | Dietary advice | 3.49 (1.31, 5.64)   | Low fat         | Mod | No      | Mod | Serious   | Low   | 3.49 (1.31, 5.64)    | NA    | Mod  | No | Serious   | Low   |
| DASH              | Dietary advice | -0.21 (-3.24, 2.80) | Usual diet      | Mod | No      | Mod | Serious   | Low   | -0.21 (-3.24, 2.80)  | NA    | Mod  | No | Serious   | Low   |
| Jenny Craig       | Dietary advice | 2.15 (-2.96, 7.26)  |                 |     |         |     |           |       | -1.15 (-3.84, 1.60)  | 0.131 | High | No | Serious   | Mod   |
| Mediterranean     | Dietary advice | 0.45 (-2.25, 3.08)  | Usual diet      | Mod | No      | Mod | Serious   | Low   | 1.10 (-0.94, 3.01)   | 0.479 | Mod  | No | Serious   | Low   |
| Ornish            | Dietary advice | -3.44 (-7.33, 0.35) | Low fat         | Mod | No      | Mod | Serious   | Low   | -3.16 (-6.12, -0.27) | 0.827 | Mod  | No | Serious   | Low   |
| Paleolithic       | Dietary advice | -0.83 (-7.19, 5.55) | Low fat         | Mod | No      | Mod | V serious | V low | -0.83 (-7.19, 5.55)  | NA    | Mod  | No | V serious | V low |
| Portfolio         | Dietary advice | -1.56 (-6.56, 3.41) | Low fat         | Mod | Serious | Low | Serious   | V low | -1.56 (-6.56, 3.41)  | NA    | Low  | No | V serious | V low |
| Rosemary Conley   | Dietary advice | -0.34 (-5.33, 4.62) | Weight Watchers | Mod | Serious | Low | Serious   | V low | -0.34 (-5.33, 4.62)  | NA    | Low  | No | V serious | V low |
| South Beach       | Dietary advice | 2.05 (-4.23, 8.30)  | Low fat         | Mod | No      | Mod | V serious | V low | 2.05 (-4.23, 8.30)   | NA    | Mod  | No | V serious | V low |
| The Biggest Loser | Dietary advice | 1.70 (-2.68, 5.98)  | Usual diet      | Mod | Serious | Low | Serious   | V low | 1.70 (-2.68, 5.98)   | NA    | Low  | No | Serious   | V low |
| Volumetrics       | Dietary advice | 1.57 (-3.54, 6.64)  | Low fat         | Mod | No      | Mod | V serious | V low | 1.57 (-3.54, 6.64)   | NA    | Mod  | No | V serious | Low   |
| Weight Watchers   | Dietary advice | -0.78 (-4.13, 2.59) |                 |     |         |     |           |       | 0.83 (-1.30, 2.85)   | 0.245 | High | No | Serious   | Mod   |
| Zone              | Dietary advice | 1.37 (-1.25, 3.94)  | Low fat         | Mod | No      | Mod | Serious   | Low   | 1.37 (-1.25, 3.94)   | NA    | Mod  | No | Serious   | Low   |
| Atkins            | Low fat        | 5.74 (1.58, 9.80)   | Zone            | Mod | No      | Mod | Serious   | Low   | 3.91 (2.92, 4.92)    | 0.363 | Mod  | No | No        | Mod   |
| DASH              | Low fat        | 1.02 (-2.17, 4.29)  | Usual diet      | Mod | No      | Mod | Serious   | Low   | 0.22 (-2.60, 3.05)   | 0.308 | High | No | Serious   | Mod   |
| Jenny Craig       | Low fat        | -2.47 (-6.05, 1.24) |                 |     |         |     |           |       | -0.73 (-3.62, 2.23)  | 0.141 | High | No | Serious   | Mod   |
| Mediterranean     | Low fat        | 2.55 (-0.31, 5.14)  | Atkins          | Mod | No      | Mod | Serious   | Low   | 1.51 (-0.37, 3.31)   | 0.266 | High | No | Serious   | Mod   |
| Ornish            | Low fat        | -3.83 (-7.78, 0.07) | Atkins          | Mod | No      | Mod | Serious   | Low   | -2.75 (-5.54, 0.01)  | 0.570 | High | No | Serious   | Mod   |
| Paleolithic       | Low fat        | NA                  |                 |     |         |     |           |       | -0.39 (-6.39, 5.65)  | NA    | High | No | V serious | Low   |
| Portfolio         | Low fat        | NA                  |                 |     |         |     |           |       | -1.13 (-5.68, 3.41)  | NA    | High | No | Serious   | Mod   |

|                   |         |                       |            |      |         |      |           |       |                      |       |      |    |           |       |
|-------------------|---------|-----------------------|------------|------|---------|------|-----------|-------|----------------------|-------|------|----|-----------|-------|
| Rosemary Conley   | Low fat | 0.10 (-4.84, 5.01)    | Atkins     | Mod  | Serious | Low  | V serious | V low | 0.10 (-4.84, 5.01)   | NA    | Low  | No | V serious | V low |
| South Beach       | Low fat | NA                    |            |      |         |      |           |       | 2.49 (-3.44, 8.36)   | NA    | High | No | V serious | Low   |
| The Biggest Loser | Low fat | 2.13 (-2.15, 6.38)    | Low fat    | Mod  | Serious | Low  | Serious   | V low | 2.13 (-2.15, 6.38)   | NA    | Low  | No | Serious   | V low |
| Volumetrics       | Low fat | NA                    |            |      |         |      |           |       | 2.00 (-2.66, 6.65)   | NA    | High | No | V serious | Low   |
| Weight Watchers   | Low fat | 1.26 (-1.11, 3.58)    | Atkins     | Mod  | No      | Mod  | Serious   | Low   | 1.26 (-1.11, 3.58)   | NA    | Mod  | No | Serious   | Low   |
| Zone              | Low fat | 3.69 (-2.59, 9.98)    | Atkins     | Mod  | No      | Mod  | Serious   | Low   | 1.81 (0.07, 3.54)    | 0.553 | Mod  | No | Serious   | Low   |
| DASH              | Atkins  | -3.69 (-6.62, -0.78)  | Low fat    | Mod  | No      | Mod  | Serious   | Low   | -3.69 (-6.62, -0.78) | NA    | Mod  | No | Serious   | Low   |
| Jenny Craig       | Atkins  | -4.64 (-7.65, -1.58)  | Low fat    | Mod  | No      | Mod  | Serious   | Low   | -4.64 (-7.65, -1.58) | NA    | Mod  | No | Serious   | Low   |
| Mediterranean     | Atkins  | -1.99 (-4.54, 0.39)   | Low fat    | Mod  | No      | Mod  | Serious   | Low   | -2.40 (-4.40, -0.50) | 0.702 | Mod  | No | Serious   | Low   |
| Ornish            | Atkins  | -6.25 (-11.60, -0.84) |            | Mod  | No      | Mod  | Serious   | Low   | -6.66 (-9.51, -3.88) | 0.862 | High | No | Serious   | Mod   |
| Paleolithic       | Atkins  | -4.31 (-10.40, 1.80)  | Low fat    | Mod  | No      | Mod  | Serious   | Low   | -4.31 (-10.40, 1.80) | NA    | Mod  | No | Serious   | Low   |
| Portfolio         | Atkins  | -5.04 (-9.70, -0.41)  | Low fat    | Mod  | Serious | Low  | Serious   | V low | -5.04 (-9.70, -0.41) | NA    | Low  | No | Serious   | V low |
| Rosemary Conley   | Atkins  | NA                    |            |      |         |      |           |       | -3.82 (-8.75, 1.09)  | NA    | Mod  | No | Serious   | Low   |
| South Beach       | Atkins  | -1.43 (-7.42, 4.53)   | Low fat    | Mod  | No      | Mod  | V serious | V low | -1.43 (-7.42, 4.53)  | NA    | Mod  | No | Serious   | Low   |
| The Biggest Loser | Atkins  | -1.78 (-6.13, 2.50)   | Usual diet | Mod  | Serious | Low  | Serious   | V low | -1.78 (-6.13, 2.50)  | NA    | Low  | No | Serious   | V low |
| Volumetrics       | Atkins  | -1.92 (-6.71, 2.84)   | Low fat    | Mod  | No      | Mod  | Serious   | Low   | -1.92 (-6.71, 2.84)  | NA    | Mod  | No | Serious   | Low   |
| Weight Watchers   | Atkins  | -2.19 (-5.32, 0.91)   | Usual diet | Mod  | No      | Mod  | Serious   | Low   | -2.67 (-5.10, -0.31) | 0.529 | High | No | Serious   | Mod   |
| Zone              | Atkins  | -2.09 (-4.62, 0.37)   | Low fat    | Mod  | No      | Mod  | Serious   | Low   | -2.10 (-4.03, -0.21) | 0.983 | High | No | Serious   | Mod   |
| Jenny Craig       | DASH    | -0.94 (-4.69, 2.83)   | Low fat    | High | No      | High | Serious   | Mod   | -0.94 (-4.69, 2.83)  | NA    | High | No | Serious   | Mod   |
| Mediterranean     | DASH    | 1.68 (-1.39, 4.70)    | Usual diet | Mod  | No      | Mod  | Serious   | Low   | 1.29 (-1.40, 3.89)   | 0.588 | Mod  | No | Serious   | Low   |
| Ornish            | DASH    | -2.95 (-6.76, 0.80)   | Low fat    | High | No      | High | Serious   | Mod   | -2.95 (-6.76, 0.80)  | NA    | High | No | Serious   | Mod   |

|                   |               |                      |                 |      |         |      |           |       |                      |       |      |    |           |       |
|-------------------|---------------|----------------------|-----------------|------|---------|------|-----------|-------|----------------------|-------|------|----|-----------|-------|
| Paleolithic       | DASH          | -0.62 (-7.27, 6.04)  | Low fat         | High | No      | High | V serious | Low   | -0.62 (-7.27, 6.04)  | NA    | High | No | V serious | Low   |
| Portfolio         | DASH          | -1.35 (-6.70, 3.99)  | Low fat         | High | Serious | Mod  | V serious | V low | -1.35 (-6.70, 3.99)  | NA    | Mod  | No | V serious | V low |
| Rosemary Conley   | DASH          | -0.13 (-5.51, 5.23)  | Usual diet      | Mod  | Serious | Low  | V serious | V low | -0.13 (-5.51, 5.23)  | NA    | Low  | No | V serious | V low |
| South Beach       | DASH          | 2.27 (-4.29, 8.76)   | Low fat         | High | No      | High | V serious | Low   | 2.27 (-4.29, 8.76)   | NA    | High | No | V serious | Low   |
| The Biggest Loser | DASH          | 1.90 (-2.67, 6.41)   | Usual diet      | Mod  | Serious | Low  | V serious | V low | 1.90 (-2.67, 6.41)   | NA    | Low  | No | Serious   | V low |
| Volumetrics       | DASH          | 1.78 (-3.70, 7.22)   | Low fat         | High | No      | High | V serious | Low   | 1.78 (-3.70, 7.22)   | NA    | High | No | V serious | Low   |
| Weight Watchers   | DASH          | 1.03 (-2.17, 4.19)   | Usual diet      | Mod  | No      | Mod  | Serious   | Low   | 1.03 (-2.17, 4.19)   | NA    | Mod  | No | Serious   | Low   |
| Zone              | DASH          | 1.58 (-1.70, 4.85)   | Low fat         | Mod  | No      | Mod  | Serious   | Low   | 1.58 (-1.70, 4.85)   | NA    | Mod  | No | Serious   | Low   |
| Mediterranean     | Jenny Craig   | 2.24 (-0.88, 5.23)   | Low fat         | High | No      | High | Serious   | Mod   | 2.24 (-0.88, 5.23)   | NA    | High | No | Serious   | Mod   |
| Ornish            | Jenny Craig   | -2.01 (-5.81, 1.69)  | Dietary advice  | Mod  | No      | Mod  | Serious   | Low   | -2.01 (-5.81, 1.69)  | NA    | Mod  | No | Serious   | Low   |
| Paleolithic       | Jenny Craig   | 0.33 (-6.37, 7.02)   | Low fat         | High | No      | High | Serious   | Mod   | 0.33 (-6.37, 7.02)   | NA    | High | No | V serious | Low   |
| Portfolio         | Jenny Craig   | -0.41 (-5.84, 4.95)  | Low fat         | High | Serious | Mod  | V serious | V low | -0.41 (-5.84, 4.95)  | NA    | Mod  | No | V serious | V low |
| Rosemary Conley   | Jenny Craig   | 0.81 (-4.64, 6.24)   | Atkins, Low fat | Mod  | Serious | Low  | V serious | V low | 0.81 (-4.64, 6.24)   | NA    | Low  | No | V serious | V low |
| South Beach       | Jenny Craig   | 3.20 (-3.43, 9.76)   | Low fat         | High | No      | High | V serious | Low   | 3.20 (-3.43, 9.76)   | NA    | High | No | V serious | Low   |
| The Biggest Loser | Jenny Craig   | 2.85 (-2.09, 7.66)   | Usual diet      | High | Serious | Mod  | Serious   | Low   | 2.85 (-2.09, 7.66)   | NA    | Mod  | No | Serious   | Low   |
| Volumetrics       | Jenny Craig   | 2.72 (-2.80, 8.17)   | Low fat         | High | No      | High | Serious   | Mod   | 2.72 (-2.80, 8.17)   | NA    | High | No | Serious   | Mod   |
| Weight Watchers   | Jenny Craig   | 1.81 (-1.85, 5.36)   | Dietary advice  | High | No      | High | Serious   | Mod   | 1.97 (-1.25, 5.08)   | 0.694 | High | No | Serious   | Mod   |
| Zone              | Jenny Craig   | 2.52 (-0.86, 5.84)   | Low fat         | Mod  | No      | Mod  | Serious   | Low   | 2.52 (-0.86, 5.84)   | NA    | Mod  | No | Serious   | Low   |
| Ornish            | Mediterranean | -4.25 (-7.30, -1.18) | Low fat         | High | No      | High | Serious   | Mod   | -4.25 (-7.30, -1.18) | NA    | High | No | Serious   | Mod   |
| Paleolithic       | Mediterranean | -1.91 (-8.18, 4.44)  | Low fat         | High | No      | High | V serious | Low   | -1.91 (-8.18, 4.44)  | NA    | High | No | V serious | Low   |
| Portfolio         | Mediterranean | -2.65 (-7.51, 2.29)  | Low fat         | High | Serious | Mod  | Serious   | Low   | -2.65 (-7.51, 2.29)  | NA    | Mod  | No | Serious   | Low   |

|                   |               |                     |                     |      |         |      |           |       |                     |       |      |    |           |       |
|-------------------|---------------|---------------------|---------------------|------|---------|------|-----------|-------|---------------------|-------|------|----|-----------|-------|
| Rosemary Conley   | Mediterranean | -1.42 (-6.35, 3.52) | Usual diet          | Mod  | Serious | Low  | V serious | V low | -1.42 (-6.35, 3.52) | NA    | Low  | No | V serious | V low |
| South Beach       | Mediterranean | 0.97 (-5.20, 7.16)  | Low fat             | High | No      | High | V serious | Low   | 0.97 (-5.20, 7.16)  | NA    | High | No | V serious | Low   |
| The Biggest Loser | Mediterranean | 0.61 (-3.46, 4.73)  | Usual diet          | Mod  | Serious | Low  | V serious | V low | 0.61 (-3.46, 4.73)  | NA    | Low  | No | V serious | V low |
| Volumetrics       | Mediterranean | 0.48 (-4.51, 5.53)  | Low fat             | High | No      | High | V serious | Low   | 0.48 (-4.51, 5.53)  | NA    | High | No | V serious | Low   |
| Weight Watchers   | Mediterranean | -0.26 (-2.57, 2.09) | Usual diet          | Mod  | No      | Mod  | Serious   | Low   | -0.26 (-2.57, 2.09) | NA    | Mod  | No | Serious   | Low   |
| Zone              | Mediterranean | 0.29 (-2.14, 2.77)  | Low fat             | Mod  | No      | Mod  | Serious   | Low   | 0.29 (-2.14, 2.77)  | NA    | Mod  | No | Serious   | Low   |
| Paleolithic       | Ornish        | 2.34 (-4.25, 9.03)  | Low fat             | High | No      | High | V serious | Low   | 2.34 (-4.25, 9.03)  | NA    | High | No | V serious | Low   |
| Portfolio         | Ornish        | 1.60 (-3.69, 6.96)  | Low fat             | High | Serious | Mod  | Serious   | Low   | 1.60 (-3.69, 6.96)  | NA    | Mod  | No | V serious | V low |
| Rosemary Conley   | Ornish        | 2.83 (-2.65, 8.32)  | Atkins              | Mod  | Serious | Low  | Serious   | V low | 2.83 (-2.65, 8.32)  | NA    | Low  | No | Serious   | V low |
| South Beach       | Ornish        | 5.23 (-1.32, 11.77) | Low fat             | High | No      | High | Serious   | Mod   | 5.23 (-1.32, 11.77) | NA    | High | No | Serious   | Mod   |
| The Biggest Loser | Ornish        | 4.85 (-0.04, 9.81)  | Usual diet, Low fat | Mod  | Serious | Low  | Serious   | V low | 4.85 (-0.04, 9.81)  | NA    | Low  | No | Serious   | V low |
| Volumetrics       | Ornish        | 4.74 (-0.67, 10.18) | Low fat             | High | No      | High | Serious   | Mod   | 4.74 (-0.67, 10.18) | NA    | High | No | Serious   | Mod   |
| Weight Watchers   | Ornish        | 3.28 (-0.43, 6.96)  | Dietary advice      | Mod  | No      | Mod  | Serious   | Low   | 3.99 (0.77, 7.20)   | 0.480 | High | No | Serious   | Mod   |
| Zone              | Ornish        | 4.06 (-1.70, 9.74)  | Low fat             | Mod  | No      | Mod  | Serious   | Low   | 4.56 (1.57, 7.58)   | 0.615 | High | No | Serious   | Mod   |
| Portfolio         | Paleolithic   | -0.74 (-8.28, 6.80) | Low fat             | High | Serious | Mod  | V serious | V low | -0.74 (-8.28, 6.80) | NA    | Mod  | No | V serious | V low |
| Rosemary Conley   | Paleolithic   | 0.48 (-7.27, 8.25)  | Atkins, Low fat     | Mod  | Serious | Low  | V serious | V low | 0.48 (-7.27, 8.25)  | NA    | Low  | No | V serious | V low |
| South Beach       | Paleolithic   | 2.87 (-5.57, 11.30) | Low fat             | High | No      | High | V serious | Low   | 2.87 (-5.57, 11.30) | NA    | High | No | V serious | Low   |
| The Biggest Loser | Paleolithic   | 2.52 (-4.87, 9.88)  | Usual diet, Low fat | Mod  | Serious | Low  | V serious | V low | 2.52 (-4.87, 9.88)  | NA    | Low  | No | V serious | V low |
| Volumetrics       | Paleolithic   | 2.39 (-5.23, 9.99)  | Low fat             | High | No      | High | V serious | Low   | 2.39 (-5.23, 9.99)  | NA    | High | No | V serious | Low   |
| Weight Watchers   | Paleolithic   | 1.65 (-4.83, 8.07)  | Atkins, Low fat     | Mod  | No      | Mod  | V serious | V low | 1.65 (-4.83, 8.07)  | NA    | Mod  | No | V serious | V low |
| Zone              | Paleolithic   | 2.20 (-4.09, 8.41)  | Atkins, Low fat     | Mod  | No      | Mod  | V serious | V low | 2.20 (-4.09, 8.41)  | NA    | Mod  | No | V serious | V low |

|                   |                   |                     |                     |      |         |      |           |       |                     |       |      |    |           |       |
|-------------------|-------------------|---------------------|---------------------|------|---------|------|-----------|-------|---------------------|-------|------|----|-----------|-------|
| Rosemary Conley   | Portfolio         | 1.23 (-5.47, 7.87)  | Atkins, Low fat     | Mod  | Serious | Low  | V serious | V low | 1.23 (-5.47, 7.87)  | NA    | Low  | No | V serious | V low |
| South Beach       | Portfolio         | 3.62 (-3.82, 11.05) | Low fat             | High | Serious | Mod  | V serious | V low | 3.62 (-3.82, 11.05) | NA    | Mod  | No | V serious | V low |
| The Biggest Loser | Portfolio         | 3.26 (-3.00, 9.47)  | Usual diet, Low fat | Mod  | Serious | Low  | V serious | V low | 3.26 (-3.00, 9.47)  | NA    | Low  | No | V serious | V low |
| Volumetrics       | Portfolio         | 3.13 (-3.39, 9.63)  | Low fat             | High | Serious | Mod  | V serious | V low | 3.13 (-3.39, 9.63)  | NA    | Mod  | No | V serious | V low |
| Weight Watchers   | Portfolio         | 2.39 (-2.75, 7.47)  | Atkins, Low fat     | Mod  | Serious | Low  | Serious   | V low | 2.39 (-2.75, 7.47)  | NA    | Low  | No | Serious   | V low |
| Zone              | Portfolio         | 2.94 (-1.94, 7.80)  | Low fat             | Mod  | Serious | Low  | V serious | V low | 2.94 (-1.94, 7.80)  | NA    | Low  | No | Serious   | V low |
| South Beach       | Rosemary Conley   | 2.38 (-5.30, 10.07) | Atkins, Low fat     | Mod  | Serious | Low  | V serious | V low | 2.38 (-5.30, 10.07) | NA    | Low  | No | V serious | V low |
| The Biggest Loser | Rosemary Conley   | 2.04 (-4.13, 8.18)  | Usual diet          | Mod  | Serious | Low  | V serious | V low | 2.04 (-4.13, 8.18)  | NA    | Low  | No | V serious | V low |
| Volumetrics       | Rosemary Conley   | 1.91 (-4.86, 8.71)  | Atkins, Low fat     | Mod  | Serious | Low  | V serious | V low | 1.91 (-4.86, 8.71)  | NA    | Low  | No | V serious | V low |
| Weight Watchers   | Rosemary Conley   | NA                  |                     |      |         |      |           |       | 1.15 (-3.68, 6.01)  | NA    | Mod  | No | Serious   | Low   |
| Zone              | Rosemary Conley   | 1.71 (-3.46, 6.88)  | Atkins              | Mod  | Serious | Low  | V serious | V low | 1.71 (-3.46, 6.88)  | NA    | Low  | No | V serious | V low |
| The Biggest Loser | South Beach       | -0.36 (-7.65, 6.94) | Usual diet, Low fat | Mod  | Serious | Low  | V serious | V low | -0.36 (-7.65, 6.94) | NA    | Low  | No | V serious | V low |
| Volumetrics       | South Beach       | -0.49 (-7.99, 7.03) | Low fat             | High | No      | High | V serious | Low   | -0.49 (-7.99, 7.03) | NA    | High | No | V serious | Low   |
| Weight Watchers   | South Beach       | -1.23 (-7.60, 5.13) | Atkins, Low fat     | Mod  | No      | Mod  | V serious | V low | -1.23 (-7.60, 5.13) | NA    | Mod  | No | V serious | V low |
| Zone              | South Beach       | -0.69 (-6.83, 5.49) | Atkins, Low fat     | Mod  | No      | Mod  | V serious | V low | -0.69 (-6.83, 5.49) | NA    | Mod  | No | V serious | V low |
| Volumetrics       | The Biggest Loser | -0.12 (-6.42, 6.19) | Low fat, Usual diet | Mod  | Serious | Low  | V serious | V low | -0.12 (-6.42, 6.19) | NA    | Low  | No | V serious | V low |
| Weight Watchers   | The Biggest Loser | -0.87 (-5.28, 3.53) | Usual diet          | Mod  | Serious | Low  | V serious | V low | -0.87 (-5.28, 3.53) | NA    | Low  | No | V serious | V low |
| Zone              | The Biggest Loser | -0.32 (-4.88, 4.25) | Usual diet, Low fat | Mod  | Serious | Low  | V serious | V low | -0.32 (-4.88, 4.25) | NA    | Low  | No | V serious | V low |
| Weight Watchers   | Volumetrics       | -0.75 (-5.98, 4.46) | Atkins, Low fat     | Mod  | No      | Mod  | V serious | V low | -0.75 (-5.98, 4.46) | NA    | Mod  | No | V serious | V low |
| Zone              | Volumetrics       | -0.20 (-5.17, 4.77) | Low fat             | Mod  | No      | Mod  | V serious | V low | -0.20 (-5.17, 4.77) | NA    | Mod  | No | V serious | V low |
| Zone              | Weight Watchers   | 0.34 (-2.82, 3.45)  | Atkins              | High | No      | High | Serious   | Mod   | 0.57 (-2.21, 3.38)  | 0.615 | High | No | Serious   | Mod   |



Table S34: GRADE assessment for 6-month CRP reduction in individual popular diets NMA

| Arm 1           | Arm 2 (Ref)    | No. of study | No. of patients | I-square, % | MD (95%CrI)        | RoB     | Inconsistency | Indirectness | Publication bias | Direct rating without imprecision | Imprecision | Direct rating with imprecision | Direct is more precise than indirect? | Need to rate indirect? |
|-----------------|----------------|--------------|-----------------|-------------|--------------------|---------|---------------|--------------|------------------|-----------------------------------|-------------|--------------------------------|---------------------------------------|------------------------|
| Dietary advice  | Usual diet     |              |                 |             |                    |         |               |              |                  |                                   |             |                                |                                       |                        |
| Low fat         | Usual diet     |              |                 |             |                    |         |               |              |                  |                                   |             |                                |                                       |                        |
| Atkins          | Usual diet     |              |                 |             |                    |         |               |              |                  |                                   |             |                                |                                       |                        |
| Jenny Craig     | Usual diet     |              |                 |             |                    |         |               |              |                  |                                   |             |                                |                                       |                        |
| Mediterranean   | Usual diet     | 6            | 485             | 91.7        | 0.11 (-0.79, 1.05) | No      | No            | Serious      | Undetected       | Mod                               | Serious     | Low                            | Yes                                   | Yes                    |
| Ornish          | Usual diet     |              |                 |             |                    |         |               |              |                  |                                   |             |                                |                                       |                        |
| Paleolithic     | Usual diet     |              |                 |             |                    |         |               |              |                  |                                   |             |                                |                                       |                        |
| Portfolio       | Usual diet     |              |                 |             |                    |         |               |              |                  |                                   |             |                                |                                       |                        |
| Weight Watchers | Usual diet     | 1            | 471             | NA          | 2.02 (0.61, 3.43)  | Serious | No            | No           | Undetected       | Mod                               | Serious     | Low                            | Yes                                   | Yes                    |
| Zone            | Usual diet     |              |                 |             |                    |         |               |              |                  |                                   |             |                                |                                       |                        |
| Low fat         | Dietary advice |              |                 |             |                    |         |               |              |                  |                                   |             |                                |                                       |                        |
| Atkins          | Dietary advice |              |                 |             |                    |         |               |              |                  |                                   |             |                                |                                       |                        |
| Jenny Craig     | Dietary advice | 1            | 426             | NA          | 1.11 (-1.11, 3.34) | No      | No            | No           | Undetected       | High                              | Serious     | Mod                            | Yes                                   | No                     |
| Mediterranean   | Dietary advice | 1            | 40              | NA          | 2.79 (-0.55, 6.14) | No      | No            | Serious      | Undetected       | Mod                               | V serious   | Low                            | No                                    | Yes                    |
| Ornish          | Dietary advice |              |                 |             |                    |         |               |              |                  |                                   |             |                                |                                       |                        |
| Paleolithic     | Dietary advice |              |                 |             |                    |         |               |              |                  |                                   |             |                                |                                       |                        |
| Portfolio       | Dietary advice |              |                 |             |                    |         |               |              |                  |                                   |             |                                |                                       |                        |
| Weight Watchers | Dietary advice |              |                 |             |                    |         |               |              |                  |                                   |             |                                |                                       |                        |
| Zone            | Dietary advice | 1            | 24              | NA          | 1.30 (0.50, 2.09)  | No      | No            | No           | Undetected       | High                              | V serious   | Low                            | Yes                                   | No                     |

|                 |               |    |     |      |                      |         |    |    |            |      |           |     |     |     |
|-----------------|---------------|----|-----|------|----------------------|---------|----|----|------------|------|-----------|-----|-----|-----|
| Atkins          | Low fat       | 12 | 902 | 70.2 | 0.26 (-0.44, 1.03)   | Serious | No | No | Undetected | Mod  | Serious   | Low | Yes | Yes |
| Jenny Craig     | Low fat       | 1  | 227 | NA   | 0.12 (-0.95, 1.20)   | No      | No | No | Undetected | High | V serious | Low | Yes | No  |
| Mediterranean   | Low fat       | 1  | 182 | NA   | 0.30 (0.20, 0.40)    | No      | No | No | Undetected | High | Serious   | Mod | Yes | No  |
| Ornish          | Low fat       |    |     |      |                      |         |    |    |            |      |           |     |     |     |
| Paleolithic     | Low fat       | 1  | 61  | NA   | 0.20 (-0.53, 0.92)   | No      | No | No | Undetected | High | V serious | Low | Yes | No  |
| Portfolio       | Low fat       | 1  | 345 | NA   | -0.68 (-2.75, 1.39)  | No      | No | No | Undetected | High | V serious | Low | Yes | No  |
| Weight Watchers | Low fat       |    |     |      |                      |         |    |    |            |      |           |     |     |     |
| Zone            | Low fat       | 2  | 96  | 0.0  | 0.13 (-2.00, 2.26)   | No      | No | No | Undetected | High | V serious | Low | No  | Yes |
| Jenny Craig     | Atkins        |    |     |      |                      |         |    |    |            |      |           |     |     |     |
| Mediterranean   | Atkins        | 1  | 173 | NA   | -0.20 (-0.33, -0.07) | No      | No | No | Undetected | High | Serious   | Mod | Yes | No  |
| Ornish          | Atkins        | 1  | 43  | NA   | 0.05 (-4.02, 4.12)   | No      | No | No | Undetected | High | V serious | Low | NA  | NA  |
| Paleolithic     | Atkins        |    |     |      |                      |         |    |    |            |      |           |     |     |     |
| Portfolio       | Atkins        |    |     |      |                      |         |    |    |            |      |           |     |     |     |
| Weight Watchers | Atkins        | 1  | 52  | NA   | -0.61 (-2.13, 0.90)  | No      | No | No | Undetected | High | V serious | Low | Yes | No  |
| Zone            | Atkins        | 2  | 104 | 0.0  | -0.77 (-2.63, 1.09)  | No      | No | No | Undetected | High | Serious   | Mod | Yes | No  |
| Mediterranean   | Jenny Craig   |    |     |      |                      |         |    |    |            |      |           |     |     |     |
| Ornish          | Jenny Craig   |    |     |      |                      |         |    |    |            |      |           |     |     |     |
| Paleolithic     | Jenny Craig   |    |     |      |                      |         |    |    |            |      |           |     |     |     |
| Portfolio       | Jenny Craig   |    |     |      |                      |         |    |    |            |      |           |     |     |     |
| Weight Watchers | Jenny Craig   |    |     |      |                      |         |    |    |            |      |           |     |     |     |
| Zone            | Jenny Craig   |    |     |      |                      |         |    |    |            |      |           |     |     |     |
| Ornish          | Mediterranean |    |     |      |                      |         |    |    |            |      |           |     |     |     |
| Paleolithic     | Mediterranean |    |     |      |                      |         |    |    |            |      |           |     |     |     |

|                 |                 |   |    |    |                     |    |    |    |            |      |           |     |     |    |
|-----------------|-----------------|---|----|----|---------------------|----|----|----|------------|------|-----------|-----|-----|----|
| Portfolio       | Mediterranean   |   |    |    |                     |    |    |    |            |      |           |     |     |    |
| Weight Watchers | Mediterranean   |   |    |    |                     |    |    |    |            |      |           |     |     |    |
| Zone            | Mediterranean   |   |    |    |                     |    |    |    |            |      |           |     |     |    |
| Paleolithic     | Ornish          |   |    |    |                     |    |    |    |            |      |           |     |     |    |
| Portfolio       | Ornish          |   |    |    |                     |    |    |    |            |      |           |     |     |    |
| Weight Watchers | Ornish          | 1 | 51 | NA | -0.66 (-2.92, 1.60) | No | No | No | Undetected | High | V serious | Low | Yes | No |
| Zone            | Ornish          | 1 | 47 | NA | -0.68 (-3.95, 2.59) | No | No | No | Undetected | High | V serious | Low | NA  | NA |
| Portfolio       | Paleolithic     |   |    |    |                     |    |    |    |            |      |           |     |     |    |
| Weight Watchers | Paleolithic     |   |    |    |                     |    |    |    |            |      |           |     |     |    |
| Zone            | Paleolithic     |   |    |    |                     |    |    |    |            |      |           |     |     |    |
| Weight Watchers | Portfolio       |   |    |    |                     |    |    |    |            |      |           |     |     |    |
| Zone            | Portfolio       |   |    |    |                     |    |    |    |            |      |           |     |     |    |
| Zone            | Weight Watchers | 1 | 56 | NA | -0.02 (-1.25, 1.20) | No | No | No | Undetected | High | V serious | Low | Yes | No |

Table S34 continued: GRADE assessment for 6-month CRP reduction in individual popular diets NMA

| Comparison groups |                | Indirect evidence   |                                           |                      |                |                                     |             |                                  | Network evidence    |                      |                                                          |             |                 |                      |
|-------------------|----------------|---------------------|-------------------------------------------|----------------------|----------------|-------------------------------------|-------------|----------------------------------|---------------------|----------------------|----------------------------------------------------------|-------------|-----------------|----------------------|
| Arm 1             | Arm 2 (Ref)    | MD (95%CrI)         | First order loop of the most contribution | Low est of C1 and C2 | Intransitivity | Indirect rating without imprecision | Imprecision | Indirect rating with imprecision | MD (95%CrI)         | Incoherence, P-value | Higher rating of direct and indirect without imprecision | Incoherence | NMA Imprecision | Final network rating |
| Dietary advice    | Usual diet     | -1.15 (-3.30, 0.93) | Mediterranean                             | Mod                  | Serious        | Low                                 | Serious     | V low                            | -1.15 (-3.30, 0.93) | NA                   | Low                                                      | NA          | Serious         | V low                |
| Low fat           | Usual diet     | 0.33 (-1.25, 1.93)  | Mediterranean                             | Mod                  | No             | Mod                                 | V serious   | V low                            | 0.33 (-1.25, 1.93)  | NA                   | Mod                                                      | NA          | V serious       | V low                |
| Atkins            | Usual diet     | 0.64 (-0.90, 2.26)  | Mediterranean                             | Mod                  | No             | Mod                                 | Serious     | Low                              | 0.64 (-0.90, 2.26)  | NA                   | Mod                                                      | NA          | Serious         | Low                  |
| Jenny Craig       | Usual diet     | 0.19 (-2.08, 2.45)  | Mediterranean, Low fat                    | Mod                  | No             | Mod                                 | V serious   | V low                            | 0.19 (-2.08, 2.45)  | NA                   | Mod                                                      | NA          | V serious       | V low                |
| Mediterranean     | Usual diet     | 2.61 (-0.72, 6.01)  | Low fat, Zone, Weight Watchers            | Mod                  | No             | Mod                                 | Serious     | Low                              | 0.247 (-0.59, 1.13) | 0.139                | Mod                                                      | No          | Serious         | Low                  |
| Ornish            | Usual diet     | 1.11 (-1.62, 3.87)  | Mediterranean, Atkins                     | Mod                  | No             | Mod                                 | V serious   | V low                            | 1.11 (-1.62, 3.87)  | NR                   | Mod                                                      | NA          | V serious       | V low                |
| Paleolithic       | Usual diet     | 0.52 (-2.09, 3.17)  | Mediterranean, Low fat                    | Mod                  | No             | Mod                                 | V serious   | V low                            | 0.52 (-2.09, 3.17)  | NR                   | Mod                                                      | NA          | V serious       | V low                |
| Portfolio         | Usual diet     | -0.37 (-3.61, 2.88) | Mediterranean, Low fat                    | Mod                  | No             | Mod                                 | V serious   | V low                            | -0.37 (-3.61, 2.88) | NR                   | Mod                                                      | NA          | V serious       | V low                |
| Weight Watchers   | Usual diet     | -0.49 (-3.11, 2.07) | Mediterranean, Atkins                     | Mod                  | No             | Mod                                 | V serious   | V low                            | 0.87 (-0.88, 2.70)  | 0.139                | Mod                                                      | No          | Serious         | Low                  |
| Zone              | Usual diet     | 0.27 (-1.54, 2.11)  | Mediterranean, Atkins                     | Mod                  | No             | Mod                                 | V serious   | V low                            | 0.27 (-1.54, 2.11)  | NA                   | Mod                                                      | NA          | V serious       | V low                |
| Low fat           | Dietary advice | 1.48 (-0.26, 3.30)  | Jenny Craig                               | High                 | Serious        | Mod                                 | Serious     | Low                              | 1.48 (-0.26, 3.30)  | NA                   | Mod                                                      | NA          | Serious         | Low                  |
| Atkins            | Dietary advice | 1.79 (0.05, 3.68)   | Zone                                      | High                 | Serious        | Mod                                 | Serious     | Low                              | 1.79 (0.05, 3.68)   | NA                   | Mod                                                      | NA          | Serious         | Low                  |
| Jenny Craig       | Dietary advice | 1.88 (-1.33, 5.20)  |                                           |                      |                |                                     |             |                                  | 1.34 (-0.40, 3.14)  | 0.677                | High                                                     | No          | Serious         | Mod                  |
| Mediterranean     | Dietary advice | 0.95 (-1.54, 3.34)  | Zone, Atkins                              | High                 | Serious        | Mod                                 | V serious   | V low                            | 1.41 (-0.57, 3.49)  | 0.411                | Mod                                                      | No          | Serious         | Low                  |
| Ornish            | Dietary advice | 2.26 (-0.57, 5.20)  | Zone                                      | High                 | Serious        | Mod                                 | Serious     | Low                              | 2.26 (-0.57, 5.20)  | NA                   | Mod                                                      | NA          | Serious         | Low                  |
| Paleolithic       | Dietary advice | 1.67 (-1.02, 4.48)  | Zone, Low fat                             | High                 | Serious        | Mod                                 | V serious   | V low                            | 1.67 (-1.02, 4.48)  | NA                   | Mod                                                      | NA          | V serious       | V low                |

|                 |                |                     |               |      |         |      |           |     |                     |       |      |    |           |       |
|-----------------|----------------|---------------------|---------------|------|---------|------|-----------|-----|---------------------|-------|------|----|-----------|-------|
| Portfolio       | Dietary advice | 0.78 (-2.52, 4.16)  | Zone, Low fat | High | No      | High | V serious | Low | 0.78 (-2.52, 4.16)  | NA    | High | NA | Serious   | Mod   |
| Weight Watchers | Dietary advice | 2.02 (-0.15, 4.33)  | Zone          | High | Serious | Mod  | Serious   | Low | 2.02 (-0.15, 4.33)  | NA    | Mod  | NA | Serious   | Low   |
| Zone            | Dietary advice | 1.69 (-1.09, 4.68)  |               |      |         |      |           |     | 1.42 (-0.20, 3.16)  | 0.821 | High | No | Serious   | Mod   |
| Atkins          | Low fat        | 1.39 (-2.10, 4.92)  | Mediterranean | High | No      | High | V serious | Low | 0.31 (-0.35, 1.03)  | 0.520 | High | No | Serious   | Mod   |
| Jenny Craig     | Low fat        | -0.64 (-3.89, 2.51) |               |      |         |      |           |     | -0.14 (-1.97, 1.63) | 0.679 | High | No | V serious | Low   |
| Mediterranean   | Low fat        | -0.88 (-3.58, 2.12) |               |      |         |      |           |     | -0.08 (-1.54, 1.40) | 0.491 | High | No | V serious | Low   |
| Ornish          | Low fat        | 0.78 (-1.73, 3.30)  | Atkins        | Mod  | No      | Mod  | Serious   | Low | 0.78 (-1.73, 3.30)  | NA    | Mod  | NA | V serious | V low |
| Paleolithic     | Low fat        | 0.19 (-1.90, 2.29)  |               |      |         |      |           |     | 0.19 (-1.90, 2.29)  | NA    | High | NA | V serious | Low   |
| Portfolio       | Low fat        | -0.70 (-3.53, 2.13) |               |      |         |      |           |     | -0.70 (-3.53, 2.13) | NA    | High | NA | V serious | Low   |
| Weight Watchers | Low fat        | 0.55 (-1.18, 2.33)  | Atkins        | Mod  | No      | Mod  | Serious   | Low | 0.55 (-1.18, 2.33)  | NA    | Mod  | NA | V serious | V low |
| Zone            | Low fat        | -0.00 (-2.10, 2.04) | Atkins        | Mod  | No      | Mod  | Serious   | Low | -0.06 (-1.36, 1.25) | 0.928 | High | No | V serious | Low   |
| Jenny Craig     | Atkins         | -0.45 (-2.39, 1.38) | Low fat       | Mod  | No      | Mod  | Serious   | Low | -0.45 (-2.39, 1.38) | NA    | Mod  | NA | V serious | V low |
| Mediterranean   | Atkins         | -1.16 (-3.87, 1.79) |               |      |         |      |           |     | -0.39 (-1.87, 1.05) | 0.568 | High | No | V serious | Low   |
| Ornish          | Atkins         | NA                  |               |      |         |      |           |     | 0.47 (-2.03, 2.94)  | NA    | High | NA | V serious | Low   |
| Paleolithic     | Atkins         | -0.12 (-2.34, 2.06) | Low fat       | Mod  | No      | Mod  | Serious   | Low | -0.12 (-2.34, 2.06) | NA    | Mod  | NA | V serious | V low |
| Portfolio       | Atkins         | -1.02 (-3.94, 1.88) | Low fat       | Mod  | No      | Mod  | Serious   | Low | -1.02 (-3.94, 1.88) | NA    | Mod  | NA | V serious | V low |
| Weight Watchers | Atkins         | 1.97 (-1.05, 5.01)  |               |      |         |      |           |     | 0.23 (-1.48, 1.94)  | 0.163 | High | No | V serious | Low   |
| Zone            | Atkins         | -0.23 (-2.68, 2.16) |               |      |         |      |           |     | -0.37 (-1.70, 0.90) | 0.711 | High | No | Serious   | Mod   |
| Mediterranean   | Jenny Craig    | 0.06 (-2.08, 2.26)  | Low fat       | High | No      | High | Serious   | Mod | 0.06 (-2.08, 2.26)  | NA    | High | NA | V serious | Low   |

|                 |                 |                     |                 |      |    |      |         |     |                     |       |      |    |           |       |
|-----------------|-----------------|---------------------|-----------------|------|----|------|---------|-----|---------------------|-------|------|----|-----------|-------|
| Ornish          | Jenny Craig     | 0.92 (-2.06, 3.94)  | Low fat, Atkins | Mod  | No | Mod  | Serious | Low | 0.92 (-2.06, 3.94)  | NA    | Mod  | NA | V serious | V low |
| Paleolithic     | Jenny Craig     | 0.33 (-2.40, 3.11)  | Low fat         | High | No | High | Serious | Mod | 0.33 (-2.40, 3.11)  | NA    | High | NA | V serious | Low   |
| Portfolio       | Jenny Craig     | -0.56 (-3.90, 2.81) | Low fat         | High | No | High | Serious | Mod | -0.56 (-3.90, 2.81) | NA    | High | NA | V serious | Low   |
| Weight Watchers | Jenny Craig     | 0.68 (-1.65, 3.11)  | Low fat, Atkins | Mod  | No | Mod  | Serious | Low | 0.68 (-1.65, 3.11)  | NA    | Mod  | NA | V serious | V low |
| Zone            | Jenny Craig     | 0.08 (-1.86, 2.06)  | Dietary advice  | High | No | High | Serious | Mod | 0.08 (-1.86, 2.06)  | NA    | High | NA | V serious | Low   |
| Ornish          | Mediterranean   | 0.86 (-1.86, 3.56)  | Atkins          | High | No | High | Serious | Mod | 0.86 (-1.86, 3.56)  | NA    | High | NA | V serious | Low   |
| Paleolithic     | Mediterranean   | 0.27 (-2.28, 2.81)  | Low fat         | High | No | High | Serious | Mod | 0.27 (-2.28, 2.81)  | NA    | High | NA | V serious | Low   |
| Portfolio       | Mediterranean   | -0.62 (-3.81, 2.55) | Low fat         | High | No | High | Serious | Mod | -0.62 (-3.81, 2.55) | NA    | High | NA | V serious | Low   |
| Weight Watchers | Mediterranean   | 0.62 (-1.17, 2.44)  | Atkins          | High | No | High | Serious | Mod | 0.62 (-1.17, 2.44)  | NA    | High | NA | V serious | Low   |
| Zone            | Mediterranean   | 0.02 (-1.72, 1.74)  | Atkins          | High | No | High | Serious | Mod | 0.02 (-1.72, 1.74)  | NA    | High | NA | V serious | Low   |
| Paleolithic     | Ornish          | -0.59 (-3.85, 2.68) | Atkins, Low fat | Mod  | No | Mod  | Serious | Low | -0.59 (-3.85, 2.68) | NA    | Mod  | NA | V serious | V low |
| Portfolio       | Ornish          | -1.48 (-5.27, 2.30) | Atkins, Low fat | Mod  | No | Mod  | Serious | Low | -1.48 (-5.27, 2.30) | NA    | Mod  | NA | V serious | V low |
| Weight Watchers | Ornish          | -0.23 (-2.75, 2.30) |                 |      |    |      |         |     | -0.23 (-2.75, 2.30) | NA    | High | NA | V serious | Low   |
| Zone            | Ornish          | NA                  |                 |      |    |      |         |     | -0.84 (-3.32, 1.65) | NA    | High | NA | V serious | Low   |
| Portfolio       | Paleolithic     | -0.90 (-4.40, 2.61) | Low fat         | High | No | High | Serious | Mod | -0.90 (-4.40, 2.61) | NA    | High | NA | V serious | Low   |
| Weight Watchers | Paleolithic     | 0.35 (-2.35, 3.09)  | Atkins, Low fat | Mod  | No | Mod  | Serious | Low | 0.35 (-2.35, 3.09)  | NA    | Mod  | NA | V serious | V low |
| Zone            | Paleolithic     | -0.25 (-2.70, 2.20) | Low fat         | High | No | High | Serious | Mod | -0.25 (-2.70, 2.20) | NA    | High | NA | V serious | Low   |
| Weight Watchers | Portfolio       | 1.25 (-2.06, 4.59)  | Atkins, Low fat | Mod  | No | Mod  | Serious | Low | 1.25 (-2.06, 4.59)  | NA    | Mod  | NA | V serious | V low |
| Zone            | Portfolio       | 0.65 (-2.46, 3.74)  | Low fat         | High | No | High | Serious | Mod | 0.65 (-2.46, 3.74)  | NA    | High | NA | V serious | Low   |
| Zone            | Weight Watchers | -2.42 (-5.74, 0.83) |                 |      |    |      |         |     | -0.61 (-2.41, 1.17) | 0.211 | High | No | V serious | Low   |



Table S35: Summary of individual popular diets NMA for all outcomes at 6 months

| Outcomes                | Certainty of Evidence      | Classification                                                          | Intervention          | MD (95% CrI) vs usual diet |
|-------------------------|----------------------------|-------------------------------------------------------------------------|-----------------------|----------------------------|
| Weight loss (kilograms) | Higher (Moderate to High)  | Among the most effective                                                | Jenny Craig (H)       | 7.77 (5.51, 10.0)          |
|                         |                            |                                                                         | Atkins (M)            | 5.46 (4.19, 6.75)          |
|                         |                            | Inferior to the most effective / superior to the least effective        | Volumetrics (M)       | 5.95 (1.97, 9.98)          |
|                         |                            |                                                                         | Paleolithic (M)       | 5.31 (1.89, 8.82)          |
|                         |                            |                                                                         | Low fat (M)           | 4.87 (3.42, 6.36)          |
|                         |                            |                                                                         | Zone (M)              | 4.07 (2.57, 5.60)          |
|                         |                            |                                                                         | Weight Watchers (M)   | 3.90 (2.52, 5.31)          |
|                         |                            |                                                                         | Rosemary Conley (M)   | 3.76 (1.13, 6.45)          |
|                         |                            |                                                                         | DASH (M)              | 3.63 (2.52, 4.76)          |
|                         |                            |                                                                         | Ornish (M)            | 3.64 (1.33, 5.99)          |
|                         | Mediterranean (M)          | 2.87 (1.60, 4.21)                                                       |                       |                            |
|                         | Among the least effective  | The Biggest Loser (M)                                                   | 2.88 (-0.44, 6.18)    |                            |
| Slimming World (M)      |                            | 2.15 (-0.78, 5.11)                                                      |                       |                            |
| Dietary advice (M)      |                            | 0.31 (-0.94, 1.59)                                                      |                       |                            |
| Low (Low to very low)   | May be the most effective  | South Beach (L)                                                         | 9.86 (5.64, 14.08)    |                            |
|                         | May be the least effective | Portfolio (VL)                                                          | 3.64 (-0.68, 7.96)    |                            |
| SBP Reduction (mm Hg)   | Higher (Moderate to High)  | The most effective                                                      | Paleolithic (M)       | 14.56 (7.34, 21.85)        |
|                         |                            | Inferior to the most effective / superior to the least effective        | Portfolio (M)         | 5.97 (0.74, 11.18)         |
|                         |                            |                                                                         | Atkins (M)            | 5.14 (2.78, 7.57)          |
|                         |                            |                                                                         | DASH (M)              | 4.68 (2.83, 6.64)          |
|                         |                            |                                                                         | Low fat (M)           | 3.95 (1.81, 6.10)          |
|                         |                            |                                                                         | Zone (M)              | 3.46 (0.53, 6.44)          |
|                         | Mediterranean (M)          | 2.94 (0.95, 5.02)                                                       |                       |                            |
|                         | Among the least effective  | The Biggest Loser (M)                                                   | 3.17 (-1.46, 7.81)    |                            |
|                         |                            | Ornish (M)                                                              | 0.69 (-3.06, 4.35)    |                            |
|                         | Low (Low to very low)      | May be the most effective                                               | Jenny Craig (L)       | 7.86 (1.52, 14.21)         |
|                         |                            | May be among the least effective                                        | Volumetrics (L)       | 2.93 (-3.46, 9.29)         |
|                         |                            |                                                                         | Weight Watchers (L)   | 2.80 (-0.84, 6.61)         |
| Rosemary Conley (VL)    |                            |                                                                         | 2.39 (-2.62, 7.39)    |                            |
| Dietary advice (L)      |                            |                                                                         | 0.58 (-1.85, 2.94)    |                            |
| DBP Reduction (mm Hg)   | Higher (Moderate to High)  | The most effective                                                      | Atkins (M)            | 3.30 (1.67, 4.99)          |
|                         |                            | Inferior to the most effective / superior to the least effective        | DASH (M)              | 2.84 (1.58, 4.18)          |
|                         |                            |                                                                         | Zone (M)              | 2.33 (0.24, 4.48)          |
|                         |                            |                                                                         | Low fat (M)           | 2.22 (0.75, 3.75)          |
|                         |                            | Among the least effective                                               | Paleolithic (M)       | 3.85 (-1.00, 8.75)         |
|                         |                            |                                                                         | The Biggest Loser (M) | 2.20 (-1.11, 5.52)         |
|                         |                            |                                                                         | Mediterranean (M)     | 1.03 (-0.46, 2.53)         |
|                         | Low (Low to very low)      | May be the most effective                                               | Ornish (M)            | 0.20 (-2.45, 2.80)         |
|                         |                            |                                                                         | Jenny Craig (L)       | 7.81 (3.35, 12.30)         |
|                         |                            | May be inferior to the most effective / superior to the least effective | Portfolio (L)         | 3.98 (0.36, 7.66)          |



|                       |                              |                                  |                       |                       |
|-----------------------|------------------------------|----------------------------------|-----------------------|-----------------------|
|                       |                              | May be among the least effective | Volumetrics (L)       | 1.95 (-2.58, 6.53)    |
|                       |                              |                                  | Rosemary Conley (L)   | 1.44 (-1.95, 4.85)    |
|                       |                              |                                  | Weight Watchers (L)   | 1.03 (-0.70, 2.79)    |
|                       |                              |                                  | Dietary advice (L)    | 0.40(-1.31, 2.09)     |
| LDL Reduction (mg/dL) | Higher (Moderate to High)    | The most effective               | Mediterranean (M)     | 4.59 (0.60, 8.73)     |
|                       |                              | Among the least effective        | Ornish (M)            | 4.71 (-3.45, 12.99)   |
|                       |                              |                                  | DASH (M)              | 3.93 (-3.19, 11.20)   |
|                       |                              |                                  | The Biggest Loser (M) | 3.90 (-5.64, 13.42)   |
|                       |                              |                                  | Low fat (M)           | 1.92 (-3.54, 7.38)    |
|                       | Dietary advice (M)           |                                  | -2.01 (-8.35, 4.35)   |                       |
|                       | Low (Low to very low)        | May be the most effective        | Portfolio (L)         | 21.29 (10.03, 32.55)  |
|                       |                              | May be among the least effective | Paleolithic (L)       | 7.27 (-7.71, 22.26)   |
|                       |                              |                                  | Rosemary Conley (VL)  | 7.15 (-4.66, 19.00)   |
|                       |                              |                                  | Volumetrics (L)       | 7.13 (-6.36, 20.53)   |
|                       |                              |                                  | Weight Watchers (VL)  | 7.13 (-6.36, 20.53)   |
|                       |                              |                                  | Jenny Craig (L)       | 0.21 (-8.54, 8.93)    |
|                       |                              |                                  | South Beach (L)       | -0.64 (-16.96, 15.63) |
| Atkins (L)            |                              |                                  | -2.75 (-8.56, 3.00)   |                       |
| Zone (L)              | -2.89 (-9.26, 3.47)          |                                  |                       |                       |
| HDL Increase (mg/dL)  | Higher (Moderate to High)    | Not better than usual diet       | The Biggest Loser (M) | -0.01 (-3.82, 3.81)   |
|                       |                              |                                  | Jenny Craig (M)       | -2.85 (-5.86, 0.25)   |
|                       | Low (Low to very low)        | May be the most effective        | Atkins* (L)           | 3.41 (0.83, 5.75)     |
|                       |                              | May be among the least effective | South Beach (VL)      | 0.36 (-5.85, 6.55)    |
|                       |                              |                                  | Volumetrics (L)       | -0.13 (-5.18, 4.92)   |
|                       |                              |                                  | Zone (L)              | -0.33 (-2.84, 2.19)   |
|                       |                              |                                  | Mediterranean (L)     | -0.61 (-2.15, 0.87)   |
|                       |                              |                                  | Weight Watchers (L)   | -0.88 (-3.11, 1.32)   |
|                       |                              |                                  | Dietary advice (L)    | -1.71 (-3.72, 0.37)   |
|                       |                              |                                  | DASH (L)              | -1.90 (-4.33, 0.56)   |
|                       |                              |                                  | Rosemary Conley (VL)  | -2.04 (-6.87, 2.81)   |
| Paleolithic (VL)      |                              |                                  | -2.52 (-8.85, 3.83)   |                       |
| Portfolio (VL)        | -3.26 (-8.17, 1.68)          |                                  |                       |                       |
|                       | May be worse than usual diet | Ornish (L)                       | -4.87 (-7.97, -1.77)  |                       |
|                       |                              | Low fat (L)                      | -2.13 (-4.02, -0.17)  |                       |
| CRP Reduction (mg/dL) | Low (Low to very low)        | Not better than usual diet       | Ornish (VL)           | 1.11 (-1.62, 3.87)    |
|                       |                              |                                  | Weight Watchers (L)   | 0.87 (-0.88, 2.70)    |
|                       |                              |                                  | Atkins (L)            | 0.64 (-0.90, 2.26)    |
|                       |                              |                                  | Paleolithic (VL)      | 0.52 (-2.09, 3.17)    |
|                       |                              |                                  | Low fat (VL)          | 0.33 (-1.25, 1.93)    |
|                       |                              |                                  | Zone (VL)             | 0.27 (-1.54, 2.11)    |
|                       |                              |                                  | Mediterranean (L)     | 0.25 (-0.59, 1.13)    |
|                       |                              |                                  | Jenny Craig (VL)      | 0.19 (-2.08, 2.45)    |
| Portfolio (VL)        | -0.37 (-3.61, 2.88)          |                                  |                       |                       |

|  |  |  |                     |                     |
|--|--|--|---------------------|---------------------|
|  |  |  | Dietary advice (VL) | -1.15 (-3.30, 0.93) |
|--|--|--|---------------------|---------------------|

\*Results for Atkins showed significant difference after adjusting for behavior support and exercise. 95%CrI:  
95% Credible Intervals; MD: Mean difference; NMA: Network meta-analysis

Table 36 Individual popular diets NMA results with GRADE certainty of evidence for weight loss at 6 months (kg)

|                    |                    |                     |                      |                     |                      |                     |                     |                     |                     |                     |                    |                       |                    |                     |                    |      |  |  |
|--------------------|--------------------|---------------------|----------------------|---------------------|----------------------|---------------------|---------------------|---------------------|---------------------|---------------------|--------------------|-----------------------|--------------------|---------------------|--------------------|------|--|--|
| Usual diet         |                    |                     |                      |                     |                      |                     |                     |                     |                     |                     |                    |                       |                    |                     |                    |      |  |  |
| 0.30 (-0.94, 1.58) | Dietary advice     |                     |                      |                     |                      |                     |                     |                     |                     |                     |                    |                       |                    |                     |                    |      |  |  |
| 4.87 (3.42, 6.36)* | 5.63 (3.76, 7.47)* | Low fat             |                      |                     |                      |                     |                     |                     |                     |                     |                    |                       |                    |                     |                    |      |  |  |
| 5.46 (4.19, 6.76)  | 5.15 (3.78, 6.52)  | 1.69 (0.97, 2.43)   | Atkins               |                     |                      |                     |                     |                     |                     |                     |                    |                       |                    |                     |                    |      |  |  |
| 3.64 (2.52, 4.75)  | 3.33 (1.92, 4.71)  | -0.13 (-1.33, 1.05) | -1.82 (-3.21, -0.45) | DASH                |                      |                     |                     |                     |                     |                     |                    |                       |                    |                     |                    |      |  |  |
| 7.77 (5.53, 10.01) | 6.01 (3.72, 8.29)* | 7.07 (5.89, 8.26)*  | 2.31 (0.06, 4.55)    | 4.14 (1.82, 6.45)   | Jenny Craig          |                     |                     |                     |                     |                     |                    |                       |                    |                     |                    |      |  |  |
| 2.87 (1.60, 4.20)  | 2.57 (0.94, 4.23)  | -0.90 (-2.31, 0.56) | -2.59 (-4.16, -0.98) | -0.76 (-2.34, 0.87) | -4.90 (-7.33, -2.39) | Mediterranean       |                     |                     |                     |                     |                    |                       |                    |                     |                    |      |  |  |
| 3.64 (1.33, 5.99)  | 3.33 (1.09, 5.60)  | -0.13 (-2.28, 2.06) | -1.82 (-4.02, 0.41)  | 0.00 (-2.38, 2.42)  | -4.14 (-7.03, -1.15) | 0.77 (-1.76, 3.30)  | Ornish              |                     |                     |                     |                    |                       |                    |                     |                    |      |  |  |
| 5.31 (1.89, 8.82)  | 5.01 (1.46, 8.61)  | 1.55 (-1.89, 5.04)  | -0.14 (-3.64, 3.41)  | 1.68 (-1.84, 5.29)  | -2.46 (-6.42, 1.60)  | 2.44 (-0.85, 5.77)  | 1.68 (-2.36, 5.75)  | Paleolithic         |                     |                     |                    |                       |                    |                     |                    |      |  |  |
| 3.64 (-0.68, 7.96) | 3.33 (-1.03, 7.69) | -0.13 (-4.31, 4.05) | -1.82 (-6.07, 2.42)  | 0.01 (-4.35, 4.35)  | -4.14 (-8.83, 0.58)  | 0.77 (-3.68, 5.16)  | 0.00 (-4.74, 4.68)  | -1.68 (-7.16, 3.72) | Portfolio           |                     |                    |                       |                    |                     |                    |      |  |  |
| 3.76 (1.13, 6.45)  | 3.46 (0.85, 6.11)  | 0.00 (-2.69, 2.71)  | -1.69 (-4.44, 1.07)  | 0.13 (-2.63, 2.93)  | -4.01 (-7.25, -0.70) | 0.89 (-1.99, 3.78)  | 0.12 (-3.22, 3.47)  | -1.55 (-5.85, 2.73) | 0.13 (-4.84, 5.13)  | Rosemary Conley     |                    |                       |                    |                     |                    |      |  |  |
| 2.15 (-0.78, 5.11) | 1.85 (-1.05, 4.75) | -1.61 (-4.61, 1.39) | -3.31 (-6.36, -0.24) | -1.48 (-4.53, 1.59) | -5.62 (-9.10, -2.11) | -0.72 (-3.90, 2.42) | -1.49 (-5.07, 2.09) | -3.16 (-7.68, 1.28) | -1.49 (-6.62, 3.68) | -1.61 (-5.00, 1.75) | Slimming World     |                       |                    |                     |                    |      |  |  |
| 9.86 (5.64, 14.08) | 9.56 (5.30, 13.80) | 6.10 (2.02, 10.17)  | 4.41 (0.26, 8.53)    | 6.23 (1.98, 10.48)  | 2.09 (-2.49, 6.71)   | 6.99 (2.66, 11.28)  | 6.22 (1.59, 10.84)  | 4.55 (-0.83, 9.85)  | 6.22 (0.39, 12.06)  | 6.11 (1.20, 10.97)  | 7.72 (2.65, 12.75) | South Beach           |                    |                     |                    |      |  |  |
| 2.88 (-0.44, 6.18) | 2.58 (-0.99, 6.11) | -0.89 (-4.38, 2.58) | -2.58 (-6.14, 0.95)  | -0.76 (-4.26, 2.73) | -4.89 (-8.88, -0.90) | 0.01 (-3.59, 3.52)  | -0.76 (-4.83, 3.26) | -2.44 (-7.27, 2.29) | -0.75 (-6.21, 4.67) | -0.88 (-5.18, 3.34) | 0.72 (-3.70, 5.14) | -6.99 (-12.35, -1.67) | The Biggest Loser  |                     |                    |      |  |  |
| 5.95 (1.97, 9.98)  | 5.65 (1.63, 9.69)  | 2.19 (-1.66, 6.04)  | 0.50 (-3.42, 4.41)   | 2.32 (-1.70, 6.37)  | -1.82 (-6.20, 2.61)  | 3.08 (-1.04, 7.18)  | 2.32 (-2.11, 6.72)  | 0.64 (-4.54, 5.77)  | 2.32 (-3.36, 8.03)  | 2.20 (-2.53, 6.90)  | 3.80 (-1.08, 8.69) | -3.90 (-9.53, 1.68)   | 3.07 (-2.08, 8.29) | Volumetrics         |                    |      |  |  |
| 3.90 (2.52, 5.29)  | 3.59 (2.42, 4.76)  | 0.14 (-1.25, 1.51)  | -1.56 (-3.07, -0.05) | 0.26 (-1.29, 1.83)  | -3.88 (-6.12, -1.59) | 1.03 (-0.76, 2.77)  | 0.26 (-2.14, 2.62)  | -1.42 (-5.08, 2.20) | 0.26 (-4.14, 4.67)  | 0.14 (-2.53, 2.76)  | 1.75 (-1.19, 4.67) | -5.96 (-10.25, -1.67) | 1.02 (-2.55, 4.62) | -2.05 (-6.15, 2.02) | Weight Watchers    |      |  |  |
| 4.07 (2.57, 5.60)  | 3.77 (2.19, 5.35)  | 0.31 (-0.77, 1.39)  | -1.38 (-2.62, -0.15) | 0.44 (-1.15, 2.04)  | -3.69 (-6.06, -1.30) | 1.20 (-0.59, 2.97)  | 0.44 (-1.86, 2.71)  | -1.25 (-4.88, 2.36) | 0.43 (-3.88, 4.76)  | 0.31 (-2.59, 3.18)  | 1.92 (-1.24, 5.09) | -5.79 (-10.01, -1.56) | 1.19 (-2.42, 4.86) | -1.88 (-5.88, 2.12) | 0.17 (-1.52, 1.88) | Zone |  |  |

High certainty Moderate certainty Low certainty Very low certainty

The values above the popular diets correspond to the difference in median weight loss between the column and row at 6 months, for positive values the diet indicated in the column is favored (e.g., the difference in median weight loss between the Jenny Craig and usual diet at 6 months is 7.77 kg). Diets in bold indicate a significant treatment effect. \* Estimates were informed by direct evidence because of serious inconsistency in these comparisons.

The NMA included 97 RCTs enrolling 12,727 participants involving 14 popular diets and 3 control diets and reported weight loss at 6 months ( $\pm$  3 months); of 136 paired comparisons 31 had direct and indirect evidence, 10 had only direct evidence, and 95 had only indirect evidence (Appendix table S27). Although the heterogeneity of the network was low ( $\tau=0.38$ ), 7 of 18 direct comparisons with more than one RCT had  $I^2 >50\%$ . In 4 of 31 comparisons, we identified serious incoherence between direct and indirect evidence; in our evidence summaries, we used the estimates with higher certainty of direct and indirect for these comparisons (Appendix table S27). On the basis of substantial differences between unadjusted and adjusted network estimates, we identified serious intransitivity in 38 of 136 comparisons (Appendix table S27). Appendix table S34 presents the league table with the NMA estimates and GRADE assessments. Much of the evidence was judged as moderate or low certainty, most often because of serious inconsistency and imprecision.

Table S37: Individual popular diets NMA results for weight loss at 12 months (kg)

|                        |                         |                        |                        |                        |                         |                        |                        |                          |                        |                       |                        |                    |      |
|------------------------|-------------------------|------------------------|------------------------|------------------------|-------------------------|------------------------|------------------------|--------------------------|------------------------|-----------------------|------------------------|--------------------|------|
| Usual diet             |                         |                        |                        |                        |                         |                        |                        |                          |                        |                       |                        |                    |      |
| -0.63<br>(-2.29, 1.00) | Dietary advice          |                        |                        |                        |                         |                        |                        |                          |                        |                       |                        |                    |      |
| 2.67<br>(1.07, 4.29)   | -3.30<br>(-4.62, -2.03) | Low fat                |                        |                        |                         |                        |                        |                          |                        |                       |                        |                    |      |
| 3.84<br>(2.10, 5.59)   | 4.48<br>(3.02, 5.95)    | 1.18<br>(0.25, 2.07)   | Atkins                 |                        |                         |                        |                        |                          |                        |                       |                        |                    |      |
| 3.08<br>(0.48, 5.66)   | 3.71<br>(0.66, 6.77)    | 0.41 (-2.65, 3.43)     | -0.77<br>(-3.89, 2.34) | DASH                   |                         |                        |                        |                          |                        |                       |                        |                    |      |
| 7.18<br>(4.78, 9.56)   | 7.81<br>(5.88, 9.76)    | 4.51<br>(2.46, 6.51)   | 3.34<br>(1.15, 5.5)    | 4.11<br>(0.58, 7.61)   | Jenny Craig             |                        |                        |                          |                        |                       |                        |                    |      |
| 2.80<br>(0.86, 4.72)   | 3.43<br>(1.56, 5.32)    | 0.14 (-1.37, 1.57)     | -1.04<br>(-2.77, 0.65) | -0.27<br>(-3.51, 2.94) | -4.38<br>(-6.84, -1.91) | Mediterranean          |                        |                          |                        |                       |                        |                    |      |
| 2.35<br>(0.06, 4.77)   | 2.99<br>(1.00, 5.07)    | -0.31<br>(-2.22, 1.67) | -1.49<br>(-3.46, 0.57) | -0.73<br>(-4.13, 2.84) | -4.83<br>(-7.42, -2.10) | -0.45<br>(-2.79, 2.03) | Ornish                 |                          |                        |                       |                        |                    |      |
| 6.97<br>(3.08, 10.90)  | 7.61<br>(3.85, 11.42)   | 4.31<br>(0.74, 7.88)   | 3.14 (-0.54, 6.82)     | 3.90 (-0.76, 8.61)     | -0.20<br>(-4.26, 3.91)  | 4.18<br>(0.33, 8.07)   | 4.62<br>(0.55, 8.64)   | Paleolithic              |                        |                       |                        |                    |      |
| 2.80<br>(0.30, 5.34)   | 3.43<br>(1.18, 5.75)    | 0.13 (-2.23, 2.51)     | -1.05<br>(-3.44, 1.39) | -0.28<br>(-3.84, 3.36) | -4.39<br>(-7.26, -1.44) | -0.01<br>(-2.69, 2.76) | 0.44<br>(-2.47, 3.31)  | -4.18<br>(-8.45, 0.11)   | Rosemary Conley        |                       |                        |                    |      |
| 1.28 (-1.59, 4.18)     | 1.91 (-0.78, 4.66)      | -1.39<br>(-4.24, 1.47) | -2.57<br>(-5.49, 0.39) | -1.80<br>(-5.65, 2.10) | -5.91<br>(-9.15, -2.59) | -1.53<br>(-4.65, 1.66) | -1.07<br>(-4.40, 2.19) | -5.70<br>(-10.25, -1.12) | -1.52<br>(-4.67, 1.63) | Slimming World        |                        |                    |      |
| 4.17<br>(0.31, 8.04)   | 4.80<br>(1.07, 8.56)    | 1.49 (-2.03, 5.00)     | 0.32 (-3.31, 3.96)     | 1.09 (-3.54, 5.74)     | -3.02<br>(-7.06, 1.07)  | 1.36 (-2.43, 5.19)     | 1.81<br>(-2.25, 5.79)  | -2.81<br>(-7.83, 2.17)   | 1.37 (-2.88, 5.59)     | 2.89<br>(-1.66, 7.41) | Volumetrics            |                    |      |
| 2.98<br>(1.27, 4.65)   | 3.61<br>(2.53, 4.68)    | 0.31 (-1.08, 1.66)     | -0.86<br>(-2.40, 0.63) | -0.09<br>(-3.20, 2.97) | -4.20<br>(-6.33, -2.08) | 0.18 (-1.76, 2.10)     | 0.62<br>(-1.56, 2.70)  | -4.00<br>(-7.85, -0.22)  | 0.18 (-2.14, 2.42)     | 1.70<br>(-1.09, 4.43) | -1.19<br>(-4.97, 2.57) | Weight Watchers    |      |
| 3.25<br>(1.20, 5.33)   | 3.88<br>(2.11, 5.70)    | 0.58 (-0.79, 1.97)     | -0.60<br>(-2.13, 0.99) | 0.17 (-3.10, 3.51)     | -3.93<br>(-6.31, -1.49) | 0.45 (-1.52, 2.49)     | 0.9<br>(-1.26, 2.99)   | -3.73<br>(-7.55, 0.10)   | 0.45 (-2.23, 3.12)     | 1.98<br>(-1.14, 5.10) | -0.92<br>(-4.68, 2.87) | 0.27 (-1.54, 2.14) | Zone |

The values correspond to the difference in mean weight lost between the row and column at 12 months (e.g., the difference in average weight lost between the Jenny Craig diet and usual diet at 12 months is 7.18 kg).

44 RCTs with 8,811 participants involving 14 network nodes reported 12-month weight loss. Portfolio, South Beach, and The Biggest Loser diets were not assessed at 12-month because there were no relevant RCTs. All other popular diets except Paleolithic slightly decreased in their estimated effects at 12-month follow-up compared with 6-month follow-up. The Jenny Craig kept the largest weight loss at this time point compared to usual diet.

Table S38 Individual popular diets NMA results with GRADE certainty of evidence for both DBP reduction (above right) and SBP reduction (below left) at 6 months (mm Hg)

|               |                            | DBP reduction              |                            |                           |                           |                           |                            |                            |                        |                          |                       |                       |                      |                       |                           |
|---------------|----------------------------|----------------------------|----------------------------|---------------------------|---------------------------|---------------------------|----------------------------|----------------------------|------------------------|--------------------------|-----------------------|-----------------------|----------------------|-----------------------|---------------------------|
| SBP reduction | Usual diet                 | 0.41 (-1.30, 2.10)         | <b>2.24 (0.77, 3.76)</b>   | <b>3.32 (1.69, 5.00)</b>  | <b>2.85 (1.59, 4.18)</b>  | <b>7.81 (3.35, 12.30)</b> | 1.02 (-0.48, 2.53)         | 0.20 (-2.45, 2.80)         | 3.85 (-1.00, 8.75)     | <b>3.98 (0.36, 7.66)</b> | 1.44 (-1.95, 4.85)    | 2.20 (-1.11, 5.52)    | 1.95 (-2.58, 6.53)   | 1.04 (-0.67, 2.80)    | <b>2.33 (0.24, 4.48)</b>  |
|               | 0.58 (-1.84, 2.93)         | Dietary advice             | <b>1.83 (0.10, 3.62)</b>   | <b>2.91 (1.07, 4.81)</b>  | <b>2.44 (0.73, 4.25)</b>  | <b>7.41 (2.86, 12.00)</b> | 0.61 (-1.38, 2.64)         | -0.21 (-2.81, 2.36)        | 3.44 (-1.51, 8.45)     | <b>3.58 (0.16, 7.37)</b> | 1.03 (-2.51, 4.59)    | 1.79 (-1.92, 5.53)    | 1.54 (-3.07, 6.23)   | 0.63 (-0.85, 2.18)    | 1.92 (-0.21, 4.13)        |
|               | <b>3.94 (1.79, 6.06)</b>   | <b>1.97 (-0.47, 4.47)*</b> | Low fat                    | <b>1.08 (0.19, 1.97)</b>  | 0.60 (-0.94, 2.19)        | <b>5.58 (1.34, 9.80)</b>  | -1.22 (-3.17, 0.69)        | -2.04 (-4.44, 0.27)        | 1.60 (-3.02, 6.24)     | 1.75 (-1.59, 5.08)       | -0.80 (-4.24, 2.63)   | -0.04 (-3.71, 3.57)   | -0.29 (-4.58, 4.01)  | -1.20 (-3.06, 0.65)   | <b>0.09 (-1.60, 1.79)</b> |
|               | <b>5.13 (2.76, 7.51)</b>   | <b>4.54 (1.99, 7.19)</b>   | 1.19 (-0.06, 2.48)         | Atkins                    | -0.47 (-2.17, 1.27)       | <b>4.50 (0.17, 8.81)</b>  | -2.30 (-4.37, 0.25)        | -3.12 (-5.55, -0.78)       | 0.53 (-4.19, 5.23)     | 0.67 (-2.78, 4.12)       | -1.88 (-5.33, 1.55)   | -1.12 (-4.86, 2.56)   | -1.37 (-5.75, 3.01)  | -2.28 (-5.75, 0.35)   | -0.99 (-2.75, 0.80)       |
|               | <b>4.68 (2.83, 6.62)</b>   | <b>4.09 (1.74, 6.63)</b>   | 0.74 (-1.42, 3.01)         | -0.45 (-2.87, 2.04)       | DASH                      | <b>4.97 (0.44, 9.46)</b>  | -1.82 (-3.69, 0.03)        | -2.65 (-5.38, -0.02)       | 1.00 (-3.90, 5.89)     | 1.14 (-2.56, 4.79)       | -1.41 (-4.96, 2.08)   | -0.64 (-4.26, 2.88)   | -0.90 (-5.48, 3.68)  | -1.80 (-3.73, 0.07)   | -0.52 (-2.70, 1.65)       |
|               | <b>7.86 (1.52, 14.21)</b>  | <b>7.29 (0.88, 13.72)</b>  | 3.93 (-2.03, 9.86)         | 2.74 (-3.36, 8.77)        | 3.18 (-3.20, 9.50)        | Jenny Craig               | -6.79 (-11.45, -2.16)      | -7.62 (-12.48, -2.80)      | -3.97 (-10.22, 2.32)   | -3.83 (-9.20, 1.56)      | -6.37 (-11.82, -0.95) | -5.61 (-11.19, -0.06) | -5.86 (-11.88, 0.15) | -6.77 (-11.37, -2.16) | -5.48 (-10.01, -0.91)     |
|               | <b>2.95 (0.94, 5.01)</b>   | 2.37 (-0.32, 5.17)         | -0.99 (-3.58, 1.66)        | -2.18 (-4.98, 0.65)       | -1.73 (-4.27, 0.78)       | -4.92 (-11.40, 1.62)      | Mediterranean              | -0.82 (-3.75, 2.04)        | 2.82 (-2.96, 7.87)     | 2.96 (-0.86, 6.83)       | 0.42 (-3.24, 4.07)    | 1.18 (-2.47, 4.82)    | 0.92 (-3.77, 5.65)   | 0.02 (-2.10, 2.16)    | 1.31 (-1.10, 3.77)        |
|               | 0.69 (-3.06, 4.35)         | 0.10 (-3.53, 3.76)         | -3.25 (-6.54, 0.02)        | -4.44 (-7.79, -1.18)      | -3.98 (-7.85, -0.32)      | -7.18 (-13.99, -0.44)     | -2.26 (-6.34, 1.66)        | Ornish                     | 3.66 (-1.51, 8.88)     | 3.79 (-0.24, 7.92)       | 1.24 (-2.75, 5.30)    | 2.00 (-2.19, 6.26)    | 1.76 (-3.10, 6.71)   | 0.85 (-1.80, 3.58)    | 2.13 (-0.35, 4.73)        |
|               | <b>14.56 (7.34, 21.85)</b> | <b>13.99 (6.71, 21.37)</b> | <b>10.63 (3.72, 17.57)</b> | <b>9.45 (2.42, 16.48)</b> | <b>9.89 (2.60, 17.14)</b> | 6.71 (-2.42, 15.88)       | <b>11.62 (4.22, 19.02)</b> | <b>13.90 (6.26, 21.54)</b> | Paleolithic            | 0.14 (-5.60, 5.85)       | -2.42 (-8.21, 3.36)   | -1.65 (-7.55, 4.21)   | -1.89 (-8.24, 4.44)  | -2.80 (-7.83, 2.19)   | -1.52 (-6.45, 3.41)       |
|               | <b>5.97 (0.74, 11.18)</b>  | <b>5.39 (0.07, 10.75)</b>  | 2.03 (-2.74, 6.77)         | 0.85 (-4.13, 5.72)        | 1.30 (-4.02, 6.46)        | -1.91 (-9.50, 5.72)       | 3.02 (-2.46, 8.40)         | 5.28 (-0.47, 11.07)        | -8.61 (-17.02, -0.22)  | Portfolio                | -2.55 (-7.35, 2.23)   | -1.78 (-6.73, 3.10)   | -2.04 (-7.47, 3.41)  | -2.94 (-6.77, 0.86)   | -1.66 (-2.11, 2.11)       |
|               | 2.39 (-2.62, 7.39)         | 1.81 (-3.33, 6.99)         | -1.55 (-6.59, 3.49)        | -2.74 (-7.80, 2.31)       | -2.29 (-7.51, 2.83)       | -5.48 (-13.30, 2.36)      | -0.56 (-5.89, 4.69)        | 1.71 (-4.11, 7.56)         | -12.20 (-20.76, -3.59) | Rosemary Conley          | 0.77 (-4.01, 5.49)    | 0.51 (-4.97, 6.02)    | -0.39 (-3.85, 3.06)  | 0.89 (-2.82, 4.65)    |                           |
|               | 3.17 (-1.46, 7.81)         | 2.60 (-2.58, 7.84)         | -0.77 (-5.87, 4.35)        | -1.95 (-7.18, 3.25)       | -1.49 (-6.58, 3.45)       | -4.70 (-12.54, 3.18)      | 0.23 (-4.88, 5.26)         | 2.48 (-3.40, 8.44)         | -11.40 (-20.01, -2.83) | The Biggest Loser        | 0.79 (-6.04, 7.62)    | -0.24 (-8.12, 7.63)   | -0.25 (-5.86, 5.42)  | -1.16 (-4.88, 2.62)   | 0.12 (-3.78, 4.11)        |
|               | 2.93 (-3.46, 9.29)         | 2.34 (-4.13, 8.85)         | -1.01 (-7.04, 4.99)        | -2.20 (-8.39, 3.92)       | -1.76 (-8.19, 4.61)       | -4.94 (-13.40, 3.53)      | -0.02 (-6.64, 6.49)        | 2.25 (-4.60, 9.06)         | -11.65 (-20.85, -2.51) | Volume trials            | 0.54 (-7.34, 8.40)    | -0.24 (-8.12, 7.63)   | -0.38 (-6.92, 6.24)  | Weight Watchers       | 1.29 (-0.97, 3.58)        |
|               | <b>2.55 (0.08, 5.08)</b>   | 1.96 (-0.10, 4.19)         | -1.39 (-4.02, 1.33)        | -2.58 (-5.35, 0.23)       | -2.13 (-4.87, 0.57)       | -5.32 (-11.80, 1.23)      | -0.40 (-3.37, 2.57)        | 1.86 (-1.92, 5.77)         | -12.02 (-19.44, -4.61) | Zone                     | 0.16 (-4.86, 5.25)    | -0.63 (-5.86, 4.68)   | 0.54 (-6.92, 6.24)   | 0.92 (-2.31, 4.11)    |                           |
|               | <b>3.46 (0.53, 6.44)</b>   | 2.88 (-0.02, 5.90)         | -0.47 (-2.76, 1.85)        | -1.66 (-4.13, 0.79)       | -1.21 (-4.26, 1.78)       | -4.40 (-10.76, 2.00)      | 0.51 (-2.79, 3.82)         | 2.78 (-0.66, 6.32)         | -11.11 (-18.40, -3.82) |                          | 1.08 (-4.34, 6.52)    | 0.28 (-5.17, 5.80)    | 0.54 (-5.87, 7.02)   | 0.92 (-2.31, 4.11)    |                           |

High certainty Moderate certainty Low certainty Very low certainty

The values correspond to the difference in median DBP reduction (above right) and SBP reduction (below left) between the column and row at 6 months, for positive values the diet indicated in the column is favored (e.g., the difference in median DBP reduction between Jenny Craig and usual diet at 6 months is 7.81 mm Hg; the difference in median SBP reduction between DASH and usual diet at 6 months is 4.68

mm Hg). Diets in bold indicate a significant treatment effect. \* Estimate was informed by indirect evidence because of serious inconsistency in these comparisons.

*SBP* - The NMA included 71 RCTs enrolling 10,118 participants involving 12 popular diets and 3 control diets reported SBP at 6 months ( $\pm$  3 months); of 105 paired comparisons, 24 had direct and indirect evidence, 8 had only direct evidence, and 73 had only indirect evidence (Appendix table S28). The heterogeneity of the network was low ( $\tau=0.27$ ); 2 of 14 direct comparisons with more than one RCT had  $I^2 > 50\%$ .

The comparison of low fat and dietary advice was the only comparison in which we identified serious incoherence between direct and indirect evidence (Appendix table S28). We identified serious intransitivity in 26 of 105 comparisons (Appendix table S28). Much of the evidence was judged to be moderate or low certainty, most often because of serious risk of bias and imprecision (Appendix table S35-below left, Appendix table S28).

*DBP* - The NMA for DBP was almost identical to SBP with, again, much of the evidence judged as moderate or low certainty, most often rated down for risk of bias and imprecision (Table 35-above right, Appendix table S29).

Table S39: DBP reduction (above right) and SBP reduction (below left) at 12 months across individual popular diets with 95% credible intervals

|                        |                     | 12-month DBP reduction |                      |                              |                           |                    |                     |                     |                     |                     |                     |
|------------------------|---------------------|------------------------|----------------------|------------------------------|---------------------------|--------------------|---------------------|---------------------|---------------------|---------------------|---------------------|
| 12-month SBP reduction | Usual diet          | -1.15 (-3.93, 1.62)    | 1.45 (-0.91, 4.26)   | 1.80 (-0.82, 4.65)           | -1.50 (-4.86, 1.93)       | 2.06 (-2.81, 7.38) | 1.27 (-1.57, 4.00)  | -0.61 (-3.50, 2.55) | 0.05 (-5.14, 5.71)  | -0.25 (-2.74, 2.57) | 1.69 (-1.33, 5.25)  |
|                        | 1.29 (-2.19, 5.08)  | Dietary advice         | 2.60 (-0.03, 5.69)   | 2.95 (0.12, 6.05)            | -0.34 (-4.51, 3.90)       | 3.21 (-1.8, 8.67)  | 2.42 (-1.11, 5.86)  | 0.55 (-2.33, 3.69)  | 1.21 (-4.13, 6.99)  | 0.90 (-0.56, 2.75)  | 2.85 (-0.29, 6.51)  |
|                        | 1.06 (-1.94, 4.64)  | -0.24 (-3.65, 3.54)    | Low fat              | 0.35 (-1.16, 1.67)           | -2.94 (-7.04, 0.72)       | 0.61 (-3.78, 5.00) | -0.14 (-3.32, 2.22) | -2.05 (-4.67, 0.38) | -1.4 (-6.16, 3.4)   | -1.68 (-4.54, 0.96) | 0.24 (-1.99, 2.61)  |
|                        | 2.72 (-0.59, 6.41)  | 1.41 (-2.33, 5.31)     | 1.64 (-0.26, 3.41)   | Atkins                       | -3.29 (-7.41, 0.62)       | 0.26 (-4.24, 4.95) | -0.51 (-3.74, 2.23) | -2.40 (-4.97, 0.21) | -1.75 (-6.60, 3.35) | -2.02 (-4.92, 0.84) | -0.10 (-2.43, 2.55) |
|                        | -3.74 (-8.23, 0.81) | -5.03 (-10.76, 0.43)   | -4.81 (-10.26, 0.12) | <b>-6.46 (-11.99, -1.29)</b> | DASH                      | 3.55 (-2.09, 9.58) | 2.76 (-0.84, 6.23)  | 0.89 (-3.30, 5.29)  | 1.54 (-4.38, 7.93)  | 1.26 (-2.77, 5.50)  | 3.19 (-0.96, 7.85)  |
|                        | -0.80 (-6.84, 5.81) | -2.10 (-8.41, 4.53)    | -1.86 (-7.28, 3.55)  | -3.51 (-9.14, 2.30)          | 2.94 (-4.30, 10.69)       | Jenny Craig        | -0.79 (-6.29, 4.11) | -2.66 (-7.81, 2.31) | -2.01 (-8.46, 4.47) | -2.29 (-7.58, 2.80) | -0.37 (-5.23, 4.67) |
|                        | 2.32 (-1.13, 5.48)  | 1.04 (-3.64, 5.03)     | 1.33 (-2.69, 3.98)   | -0.35 (-4.53, 2.82)          | <b>6.04 (1.10, 10.72)</b> | 3.13 (-3.72, 9.05) | Mediterranean       | -1.89 (-5.12, 1.82) | -1.22 (-6.44, 4.62) | -1.51 (-4.73, 2.15) | 0.40 (-2.73, 4.36)  |
|                        | -0.67 (-4.56, 3.77) | -1.97 (-5.94, 2.31)    | -1.75 (-5.04, 1.56)  | -3.38 (-6.73, 0.10)          | 3.08 (-2.55, 9.19)        | 0.12 (-6.19, 6.46) | -3.02 (-6.97, 2.00) | Ornish              | 0.65 (-4.63, 6.14)  | 0.37 (-2.59, 3.31)  | 2.29 (-0.39, 5.31)  |
|                        | 0.68 (-5.76, 7.60)  | -0.62 (-7.31, 6.34)    | -0.39 (-6.23, 5.39)  | -2.03 (-8.12, 4.09)          | 4.41 (-3.15, 12.50)       | 1.48 (-6.51, 9.36) | -1.65 (-7.96, 5.47) | 1.35 (-5.40, 8.02)  | Volumetrics         | -0.28 (-5.90, 5.12) | 1.65 (-3.60, 6.96)  |
|                        | 2.08 (-1.19, 5.89)  | 0.75 (-1.08, 2.96)     | 1.03 (-2.65, 4.54)   | -0.63 (-4.41, 3.21)          | <b>5.81 (0.50, 11.60)</b> | 2.89 (-3.64, 9.29) | -0.26 (-4.13, 4.56) | 2.76 (-1.42, 6.83)  | 1.40 (-5.46, 8.20)  | Weight Watchers     | 1.93 (-1.19, 5.35)  |
|                        | 1.03 (-2.94, 5.69)  | -0.28 (-4.44, 4.34)    | -0.05 (-3.00, 3.07)  | -1.69 (-4.80, 1.74)          | 4.76 (-0.86, 11.04)       | 1.81 (-4.29, 8.11) | -1.34 (-5.19, 3.80) | 1.70 (-1.88, 5.47)  | 0.35 (-6.09, 7.04)  | -1.07 (-5.29, 3.44) | Zone                |

The values correspond to the difference in median DBP reduction (above right) and SBP reduction (below left) between the column and row at 12-months (eg, the difference in median DBP reduction between Jenny Craig and usual diet at 12-months is 2.06 mm Hg; the difference in median SBP reduction between DASH and usual diet at 12-months is -3.74 mm Hg).

29 RCTs with 5,823 participants involving 8 popular diets were estimated. All popular diets decreased in their estimated effects at 12-months follow-up compared with 6-months follow-up.



Table S40 Individual popular diets NMA results with GRADE certainty of evidence for both HDL increase (above right) and LDL reduction (below left) at 6 months (mg/dL)

|                     |                             | HDL increase                |                             |                             |                             |                              |                             |                             |                                |                               |                       |                      |                       |                      |                             |                             |
|---------------------|-----------------------------|-----------------------------|-----------------------------|-----------------------------|-----------------------------|------------------------------|-----------------------------|-----------------------------|--------------------------------|-------------------------------|-----------------------|----------------------|-----------------------|----------------------|-----------------------------|-----------------------------|
| LDL reduction       | Usual diet                  | -1.70 (-3.72, 0.39)         | <b>-2.14 (-4.04, -0.20)</b> | 1.78 (-0.24, 3.85)          | -1.91 (-4.36, 0.57)         | -2.85 (-5.86, 0.24)          | -0.61 (-2.16, 0.88)         | <b>-4.87 (-7.97, -1.77)</b> | -2.52 (-8.85, 3.83)            | -3.26 (-8.17, 1.68)           | -2.04 (-6.87, 2.81)   | 0.36 (-5.85, 6.55)   | -0.01 (-3.82, 3.81)   | -0.13 (-5.18, 4.92)  | -0.88 (-3.11, 1.35)         | -0.33 (-2.84, 2.19)         |
|                     | -2.11 (-7.71, 3.53)         | Dietary advice              | -0.43 (-2.51, 1.60)         | <b>3.49 (1.31, 5.64)</b>    | -0.21 (-3.24, 2.80)         | -1.15 (-3.87, 1.59)          | 1.09 (-0.97, 3.02)          | <b>-3.17 (-6.13, -0.26)</b> | -0.83 (-7.19, 5.55)            | -1.56 (-6.56, 3.41)           | -0.34 (-5.33, 4.62)   | 2.05 (-4.23, 8.30)   | 1.70 (-2.68, 5.98)    | 1.57 (-3.54, 6.64)   | <b>0.82 (-1.29, 2.87)</b>   | 1.37 (-1.25, 3.94)          |
|                     | 1.88 (-3.00, 6.74)          | 3.97 (-1.59, 9.55)          | Low fat                     | <b>3.91 (2.93, 4.93)</b>    | 0.23 (-2.59, 3.04)          | -0.72 (-3.62, 2.24)          | 1.52 (-0.36, 3.32)          | -2.73 (-5.52, 0.03)         | -0.39 (-6.39, 5.65)            | -1.13 (-5.68, 3.41)           | 0.10 (-4.84, 5.01)    | 2.49 (-3.44, 8.36)   | 2.13 (-2.15, 6.38)    | 2.00 (-2.66, 3.58)   | 1.26 (-1.11, 3.58)          | <b>1.81 (0.06, 3.53)</b>    |
|                     | -2.74 (-7.89, 2.37)         | -0.65 (-6.45, 5.17)         | <b>-4.62 (-7.15, -2.10)</b> | Atkins                      | <b>-3.69 (-6.62, -0.78)</b> | <b>-4.64 (-7.65, -1.58)</b>  | <b>-2.39 (-4.39, -0.49)</b> | <b>-6.64 (-9.49, -3.87)</b> | -4.31 (-10.40, 1.80)           | <b>-5.04 (-9.70, -0.41)</b>   | -3.82 (-8.75, 1.09)   | -1.43 (-7.42, 4.53)  | -1.78 (-6.13, 2.50)   | -1.92 (-6.71, 2.84)  | <b>-2.66 (-5.09, -0.29)</b> | <b>-2.11 (-4.03, -0.22)</b> |
|                     | 3.81 (-2.79, 10.48)         | 5.92 (-2.49, 14.30)         | 1.96 (-5.83, 9.67)          | 6.57 (-1.36, 14.48)         | DASH                        | -0.94 (-4.69, 2.83)          | 1.30 (-1.39, 3.91)          | -2.95 (-6.76, 0.80)         | -0.62 (-7.27, 6.04)            | -1.35 (-6.70, 3.99)           | -0.13 (-5.51, 5.23)   | 2.27 (-4.29, 8.76)   | 1.90 (-2.67, 6.41)    | 1.78 (-3.70, 7.22)   | 1.03 (-2.17, 4.19)          | 1.58 (-1.70, 4.85)          |
|                     | 0.15 (-7.69, 8.04)          | 2.25 (-4.53, 9.08)          | -1.71 (-9.23, 5.79)         | 2.90 (-4.83, 10.65)         | -3.66 (-13.65, 6.39)        | Jenny Craig                  | 2.24 (-0.88, 5.23)          | -2.01 (-5.81, 1.69)         | 0.33 (-6.37, 7.02)             | -0.41 (-5.84, 4.95)           | 0.81 (-4.64, 6.24)    | 3.20 (-3.43, 9.76)   | 2.85 (-2.09, 7.66)    | 2.72 (-2.80, 8.17)   | 1.97 (-1.20, 5.08)          | 2.52 (-0.86, 5.84)          |
|                     | <b>4.42 (0.87, 8.06)</b>    | <b>6.53 (1.27, 11.83)</b>   | 2.55 (-1.92, 7.10)          | <b>7.16 (2.42, 12.00)</b>   | 0.61 (-6.57, 7.80)          | 4.28 (-3.45, 12.00)          | Mediterranean               | <b>-4.25 (-7.30, -1.18)</b> | -1.91 (-8.18, 4.44)            | -2.65 (-7.51, 2.29)           | -1.42 (-6.35, 3.52)   | 0.97 (-5.20, 7.16)   | 0.61 (-3.46, 4.73)    | 0.48 (-4.51, 5.53)   | -0.26 (-2.57, 2.09)         | 0.29 (-2.14, 2.77)          |
|                     | 4.71 (-3.45, 12.99)         | 6.82 (-1.34, 15.09)         | 2.85 (-4.33, 10.07)         | <b>7.47 (0.24, 14.76)</b>   | 0.91 (-9.28, 11.17)         | 4.57 (-5.29, 14.43)          | 0.30 (-7.76, 8.38)          | Ornish                      | 2.34 (-4.25, 9.03)             | 1.60 (-3.69, 6.96)            | 2.83 (-2.65, 8.32)    | 5.23 (-1.32, 11.77)  | 4.85 (-0.04, 9.81)    | 4.74 (-0.67, 10.18)  | <b>3.99 (0.78, 7.20)</b>    | <b>4.54 (1.54, 7.57)</b>    |
|                     | 7.27 (-7.71, 22.26)         | 9.36 (-5.89, 24.70)         | 5.40 (-8.81, 19.62)         | 10.00 (-4.42, 24.44)        | 3.44 (-12.62, 19.62)        | 7.09 (-8.98, 23.16)          | 2.83 (-12.04, 17.72)        | 2.52 (-13.41, 18.48)        | Paleolithic                    | -0.74 (-8.28, 6.80)           | 0.48 (-7.27, 8.25)    | 2.87 (-5.57, 11.30)  | 2.52 (-4.87, 9.88)    | 2.39 (-5.23, 9.99)   | 1.65 (-4.83, 8.07)          | 2.20 (-4.09, 8.41)          |
|                     | <b>21.29 (10.03, 32.55)</b> | <b>23.39 (11.79, 34.95)</b> | <b>19.41 (9.28, 29.60)</b>  | <b>24.03 (13.60, 34.53)</b> | <b>17.47 (4.66, 30.24)</b>  | <b>21.13 (8.48, 33.75)</b>   | <b>16.85 (5.74, 27.92)</b>  | <b>16.57 (4.14, 28.94)</b>  | 14.00 (-3.46, 31.43)           | Portfolio                     | 1.23 (-5.47, 7.87)    | 3.62 (-3.82, 11.05)  | 3.26 (-3.00, 9.47)    | 3.13 (-3.39, 9.63)   | 2.39 (-2.75, 7.47)          | 2.94 (-1.94, 7.80)          |
|                     | 7.15 (-4.66, 19.00)         | 9.25 (-3.09, 21.69)         | 5.28 (-6.62, 17.24)         | 9.89 (-1.98, 21.83)         | 3.35 (-10.07, 16.80)        | 7.00 (-6.52, 20.53)          | 2.73 (-9.28, 14.71)         | 2.45 (-11.20, 16.03)        | -0.09 (-18.72, 18.38)          | -14.13 (-29.73, 1.53)         | Rosemary Conley       | 2.38 (-5.30, 10.07)  | 2.04 (-4.13, 8.18)    | 1.91 (-4.86, 8.71)   | 1.15 (-3.68, 6.01)          | 1.71 (-3.46, 6.88)          |
|                     | -0.64 (-16.96, 15.63)       | 1.47 (-15.06, 17.98)        | -2.51 (-18.07, 13.07)       | 2.11 (-13.66, 17.89)        | -4.46 (-21.78, 12.91)       | -0.81 (-18.03, 16.43)        | -5.06 (-21.28, 11.11)       | -5.36 (-22.58, 11.79)       | -7.91 (-28.96, 13.10)          | <b>-21.93 (-40.45, -3.32)</b> | -7.81 (-27.35, 11.76) | South Beach          | -0.36 (-7.65, 6.94)   | -0.49 (-7.99, 7.03)  | -1.23 (-7.60, 5.13)         | -0.69 (-6.83, 5.49)         |
|                     | 3.90 (-5.64, 13.42)         | 6.01 (-5.14, 17.06)         | 2.02 (-8.72, 12.72)         | 6.65 (-4.21, 17.48)         | 0.09 (-11.55, 11.65)        | 3.74 (-8.68, 16.07)          | -0.52 (-10.79, 9.63)        | -0.83 (-13.51, 11.74)       | -3.35 (-21.22, 14.43)          | <b>-17.39 (-32.15, -2.65)</b> | -3.26 (-18.53, 11.98) | 4.54 (-14.34, 23.45) | The Biggest Loser     | -0.12 (-6.42, 6.19)  | -0.87 (-5.28, 3.53)         | -0.32 (-4.88, 4.25)         |
|                     | 7.13 (-6.36, 20.53)         | 9.22 (-4.55, 22.99)         | 5.24 (-7.33, 17.81)         | 9.86 (-2.97, 22.71)         | 3.32 (-11.48, 18.07)        | 6.94 (-7.72, 21.60)          | 2.69 (-10.71, 15.98)        | 2.37 (-12.12, 16.84)        | -0.16 (-19.08, 18.71)          | -14.17 (-30.37, 1.94)         | -0.05 (-17.38, 17.25) | 7.75 (-12.26, 27.82) | 3.22 (-13.29, 19.69)  | Volumetrics          | -0.75 (-5.98, 4.46)         | -0.20 (-5.17, 4.77)         |
|                     | 1.06 (-5.11, 7.24)          | 3.17 (-3.23, 9.54)          | -0.81 (-7.23, 5.60)         | 3.80 (-2.69, 10.32)         | -2.76 (-11.60, 6.09)        | 0.91 (-7.48, 9.25)           | -3.36 (-9.77, 2.99)         | -3.66 (-12.59, 5.16)        | -6.20 (-21.80, 9.33)           | <b>-20.22 (-32.21, -8.21)</b> | -6.10 (-18.06, 5.81)  | 1.72 (-15.13, 18.49) | -2.83 (-14.22, 8.51)  | -6.05 (-20.17, 8.04) | Weight Watchers             | 0.55 (-2.23, 3.37)          |
| -2.89 (-9.26, 3.47) | -0.78 (-7.65, 6.03)         | <b>-4.77 (-9.15, -0.39)</b> | -0.15 (-4.92, 4.63)         | -6.72 (-15.47, 2.11)        | -3.06 (-11.60, 5.49)        | <b>-7.32 (-13.47, -1.24)</b> | -7.62 (-15.27, -0.06)       | -10.18 (-25.01, 4.69)       | <b>-24.18 (-35.26, -13.19)</b> | -10.04 (-22.64, 2.51)         | -2.26 (-18.43, 13.92) | -6.79 (-18.27, 4.70) | -10.00 (-23.33, 3.33) | -3.97 (-11.42, 3.49) | Zone                        |                             |

|                |                    |               |                    |
|----------------|--------------------|---------------|--------------------|
| High certainty | Moderate certainty | Low certainty | Very low certainty |
|----------------|--------------------|---------------|--------------------|

The values correspond to the difference in median HDL increase (above right) and LDL reduction (below left) between the column and row at 6 months, for positive values the diet indicated in the column is favored (e.g., the difference in median HDL increase between Atkins and usual diet at 6 months is 1.78 mg/dL; the difference in median LDL reduction between Mediterranean and usual diet at 6 months is 4.42 mg/dL). Diets in bold indicate a significant treatment effect.

*LDL* – The NMA included 73 RCTs enrolling 8,368 participants involving 13 popular diets and 3 control diets reported LDL at 6 months ( $\pm$  3 months); of 120 paired comparisons, 27 had direct and indirect evidence, 8 had only direct evidence, and 85 had only indirect evidence (Appendix table S30). The heterogeneity of the network was low ( $\tau=0.05$ ); 5 of 15 direct comparisons with more than one RCT had  $I^2 >50\%$ . No serious incoherence was found (Appendix table S30). We identified serious intransitivity in 18 of 120 comparisons (Appendix table S30). Much of the evidence was judged as low or very low certainty, most often because of serious risk of bias and very serious imprecision (Appendix table S33, table S36-below left).

*HDL* – The NMA for HDL was almost identical to LDL with, again, much of the evidence judged as low or very low certainty, most often rated down for serious risk of bias and imprecision (Appendix table S31).

Table S41: HDL increase (above right) and LDL reduction (below left) at 12 months across individual popular diets with 95% credible intervals

|                         |                           | 12-months HDL increase      |                             |                           |                             |                            |                          |                             |                       |                          |                             |
|-------------------------|---------------------------|-----------------------------|-----------------------------|---------------------------|-----------------------------|----------------------------|--------------------------|-----------------------------|-----------------------|--------------------------|-----------------------------|
| 12-months LDL reduction | Usual diet                | <b>-2.50 (-4.95, -0.01)</b> | <b>-3.70 (-5.83, -1.65)</b> | -0.25 (-2.59, 2.14)       | <b>-4.41 (-7.65, -1.05)</b> | -0.04 (-3.38, 3.44)        | -0.40 (-2.52, 1.74)      | <b>-5.28 (-8.18, -2.35)</b> | -1.41 (-6.13, 3.23)   | 0.17 (-2.33, 2.64)       | -2.87 (-5.75, 0.06)         |
|                         | -2.92 (-9.33, 4.30)       | Dietary advice              | -1.21 (-3.54, 1.02)         | 2.25 (-0.24, 4.74)        | -1.91 (-5.84, 2.08)         | 2.46 (-0.40, 5.43)         | 2.10 (-0.66, 4.82)       | <b>-2.78 (-5.53, -0.05)</b> | 1.08 (-3.74, 5.85)    | <b>2.67 (1.06, 4.20)</b> | -0.38 (-3.30, 2.58)         |
|                         | -0.85 (-6.65, 5.88)       | 2.02 (-4.14, 8.64)          | Low fat                     | <b>3.46 (2.21, 4.81)</b>  | -0.71 (-4.24, 3.02)         | <b>3.67 (0.72, 6.81)</b>   | <b>3.29 (1.40, 5.31)</b> | -1.58 (-3.94, 0.91)         | 2.29 (-1.91, 6.47)    | <b>3.87 (1.49, 6.32)</b> | 0.83 (-1.30, 3.06)          |
|                         | -1.77 (-8.13, 5.42)       | 1.11 (-5.66, 8.23)          | -0.93 (-4.40, 2.46)         | Atkins                    | <b>-4.17 (-7.92, -0.33)</b> | 0.20 (-3.00, 3.49)         | -0.15 (-2.47, 2.12)      | <b>-5.03 (-7.54, -2.52)</b> | -1.17 (-5.60, 3.18)   | 0.41 (-2.21, 2.99)       | <b>-2.63 (-4.95, -0.29)</b> |
|                         | 0.44 (-8.72, 9.49)        | 3.30 (-8.17, 14.14)         | 1.29 (-9.85, 11.34)         | 2.23 (-9.21, 12.67)       | DASH                        | 4.38 (-0.21, 8.94)         | <b>4.01 (0.53, 7.39)</b> | -0.87 (-5.12, 3.31)         | 2.99 (-2.66, 8.44)    | <b>4.58 (0.55, 8.49)</b> | 1.54 (-2.64, 5.65)          |
|                         | -7.65 (-16.00, 1.91)      | -4.75 (-11.41, 2.54)        | -6.77 (-14.47, 0.90)        | -5.84 (-14.07, 2.51)      | -8.04 (-19.94, 5.08)        | Jenny Craig                | -0.35 (-3.93, 3.05)      | <b>-5.24 (-8.88, -1.66)</b> | -1.38 (-6.65, 3.72)   | 0.20 (-3.06, 3.32)       | -2.83 (-6.50, 0.77)         |
|                         | <b>6.17 (0.22, 11.88)</b> | <b>9.08 (1.05, 16.01)</b>   | <b>7.14 (0.62, 11.43)</b>   | <b>8.03 (0.87, 13.39)</b> | 5.70 (-4.19, 15.57)         | <b>13.82 (3.91, 22.14)</b> | Mediterranean            | <b>-4.89 (-7.85, -1.87)</b> | -1.01 (-5.68, 3.56)   | 0.56 (-2.25, 3.37)       | -2.47 (-5.30, 0.41)         |
|                         | 5.36 (-2.27, 14.17)       | <b>8.23 (0.93, 16.23)</b>   | <b>6.24 (0.03, 12.58)</b>   | <b>7.14 (0.69, 13.83)</b> | 4.94 (-6.42, 17.51)         | <b>12.99 (3.87, 22.25)</b> | -0.85 (-8.24, 8.28)      | Ornish                      | 3.86 (-1.02, 8.65)    | <b>5.44 (2.54, 8.31)</b> | 2.41 (-0.31, 5.14)          |
|                         | 10.66 (-3.08, 24.97)      | 13.52 (-0.37, 27.72)        | 11.46 (-1.07, 24.07)        | 12.39 (-0.52, 25.45)      | 10.20 (-5.64, 27.00)        | <b>18.21 (3.61, 32.91)</b> | 4.49 (-8.69, 18.73)      | 5.22 (-8.83, 19.24)         | Volumetrics           | 1.58 (-3.23, 6.46)       | -1.45 (-6.12, 3.32)         |
|                         | -0.86 (-7.07, 6.16)       | 2.05 (-2.08, 6.28)          | 0.03 (-6.74, 6.32)          | 0.96 (-6.29, 7.83)        | -1.24 (-12.00, 10.16)       | 6.81 (-1.31, 14.30)        | -7.02 (-13.99, 1.09)     | -6.18 (-14.31, 1.28)        | -11.46 (-25.69, 2.52) | Weight Watchers          | -3.04 (-6.03, 0.03)         |
|                         | -0.43 (-7.98, 8.07)       | 2.44 (-5.27, 10.58)         | 0.42 (-5.00, 5.83)          | 1.32 (-4.55, 7.31)        | -0.88 (-12.02, 11.44)       | 7.16 (-2.03, 16.36)        | -6.64 (-13.49, 1.86)     | -5.80 (-12.98, 1.20)        | -11.05 (-24.75, 2.63) | 0.39 (-7.42, 8.63)       | Zone                        |

The values correspond to the difference in median HDL increase (above right) and LDL reduction (below left) between the column and row at 6 months (eg, the difference in median HDL increase between Atkins and usual diet at 12 months is -0.25 mg/dL; the difference in median LDL reduction between Mediterranean and usual diet at 12 months is 6.17 mg/dL).

35 RCTs with 6,070 participants involving 11 network nodes reported 12-months LDL. There were no relevant RCTs that focused on Paleolithic, Portfolio, Rosemary Conley, South Beach, and The Biggest Loser diets. Mediterranean diet demonstrated significant larger LDL reduction than usual diet. The difference between Mediterranean and Atkins was larger at 12-months than at 6-months follow up.

36 RCTs with 6,265 participants involving 11 network nodes reported 12-month HDL increase. The median HDL increase between the 8 popular diets ranged from 0.20 mg/dL and 5.03 mg/dL. None of popular diets showed significant HDL increase compared with usual diet.

Table S42 Individual popular diets NMA results with GRADE certainty of evidence for CRP reduction (mg/dL)

|                     |                    |                     |                     |                     |                     |                     |                     |                    |                     |      |  |
|---------------------|--------------------|---------------------|---------------------|---------------------|---------------------|---------------------|---------------------|--------------------|---------------------|------|--|
| Usual diet          |                    |                     |                     |                     |                     |                     |                     |                    |                     |      |  |
| -1.15 (-3.30, 0.93) | Dietary advice     |                     |                     |                     |                     |                     |                     |                    |                     |      |  |
| 0.33 (-1.25, 1.93)  | 1.48 (-0.26, 3.30) | Low fat             |                     |                     |                     |                     |                     |                    |                     |      |  |
| 0.64 (-0.90, 2.26)  | 1.79 (0.05, 3.68)  | 0.31 (-0.35, 1.03)  | Atkins              |                     |                     |                     |                     |                    |                     |      |  |
| 0.19 (-2.08, 2.45)  | 1.34 (-0.38, 3.13) | -0.13 (-1.96, 1.64) | -0.45 (-2.39, 1.38) | Jenny Craig         |                     |                     |                     |                    |                     |      |  |
| 0.25 (-0.57, 1.12)  | 1.40 (-0.57, 3.47) | -0.08 (-1.52, 1.40) | -0.39 (-1.85, 1.04) | 0.06 (-2.08, 2.26)  | Mediterranean       |                     |                     |                    |                     |      |  |
| 1.11 (-1.62, 3.87)  | 2.26 (-0.57, 5.20) | 0.78 (-1.73, 3.30)  | 0.47 (-2.03, 2.94)  | 0.92 (-2.06, 3.94)  | 0.86 (-1.86, 3.56)  | Ornish              |                     |                    |                     |      |  |
| 0.52 (-2.09, 3.17)  | 1.67 (-1.02, 4.48) | 0.19 (-1.90, 2.29)  | -0.12 (-2.34, 2.06) | 0.33 (-2.40, 3.11)  | 0.27 (-2.28, 2.81)  | -0.59 (-3.85, 2.68) | Paleolithic         |                    |                     |      |  |
| -0.37 (-3.61, 2.88) | 0.78 (-2.52, 4.16) | -0.70 (-3.53, 2.13) | -1.02 (-3.94, 1.88) | -0.56 (-3.90, 2.81) | -0.62 (-3.81, 2.55) | -1.48 (-5.27, 2.30) | -0.90 (-4.40, 2.61) | Portfolio          |                     |      |  |
| 0.88 (-0.88, 2.70)  | 2.02 (-0.15, 4.33) | 0.55 (-1.18, 2.33)  | 0.23 (-1.48, 1.94)  | 0.68 (-1.65, 3.11)  | 0.62 (-1.17, 2.44)  | -0.23 (-2.75, 2.30) | 0.35 (-2.35, 3.09)  | 1.25 (-2.06, 4.59) | Weight Watchers     |      |  |
| 0.27 (-1.54, 2.11)  | 1.42 (-0.20, 3.15) | -0.06 (-1.36, 1.24) | -0.37 (-1.69, 0.90) | 0.08 (-1.86, 2.06)  | 0.02 (-1.72, 1.74)  | -0.84 (-3.32, 1.65) | -0.25 (-2.70, 2.20) | 0.65 (-2.46, 3.74) | -0.60 (-2.41, 1.15) | Zone |  |

**High certainty**   **Moderate certainty**   **Low certainty**   **Very low certainty**

The values correspond to the difference in median CRP reduction between the column and row at 6 months, for positive values the diet indicated in the column is favored (e.g., the difference in median CRP reduction between Ornish and usual diet at 6 months is 1.11).

CRP – The NMA included 27 RCTs enrolling 3,238 participants involving 8 popular diets and 3 control diets reported CRP at 6 months (± 3 months) (Appendix table S31).

Table S43: 6-month weight loss across all individual popular diets when restricted to overweight/obese yet otherwise healthy populations (below left) and restricted to low risk of bias studies (above right)

|                                                                           |                           | Low risk of bias studies ( $\beta$ -coefficient = 2.76, 95%CrI: -0.52 to 4.94) |                          |                             |                          |                             |                             |                             |                          |                     |                      |                           |                           |                     |                    |                          |                          |
|---------------------------------------------------------------------------|---------------------------|--------------------------------------------------------------------------------|--------------------------|-----------------------------|--------------------------|-----------------------------|-----------------------------|-----------------------------|--------------------------|---------------------|----------------------|---------------------------|---------------------------|---------------------|--------------------|--------------------------|--------------------------|
| Healthy populations ( $\beta$ -coefficient = 0.72, 95%CrI: -0.96 to 2.43) | Usual diet                | -0.03 (-1.55, 1.53)                                                            | <b>3.13</b> (1.97, 4.30) | <b>4.68</b> (3.23, 6.15)    | <b>3.37</b> (2.25, 4.50) | <b>7.35</b> (5.05, 9.64)    | <b>2.50</b> (1.23, 3.84)    | <b>2.99</b> (0.65, 5.39)    | <b>4.84</b> (1.48, 8.33) | 3.01 (-1.26, 7.29)  | 2.68 (-0.34, 5.75)   | 1.65 (-1.33, 4.64)        | <b>9.22</b> (5.09, 13.40) | 2.88 (-0.34, 6.09)  | NA                 | <b>3.26</b> (1.48, 5.06) | <b>3.21</b> (1.54, 4.92) |
|                                                                           | 0.45 (-1.23, 2.17)        | Dietary advice                                                                 | <b>3.15</b> (1.68, 4.63) | <b>4.70</b> (3.02, 6.39)    | <b>3.40</b> (1.78, 5.00) | <b>7.38</b> (5.33, 9.39)    | <b>2.53</b> (0.73, 4.36)    | <b>3.02</b> (0.75, 5.33)    | <b>4.87</b> (1.30, 8.53) | 3.03 (-1.35, 7.41)  | 2.71 (-0.21, 5.63)   | 1.67 (-1.19, 4.54)        | <b>9.25</b> (5.00, 13.05) | 2.91 (-0.68, 6.45)  | NA                 | <b>3.29</b> (2.03, 4.55) | <b>3.23</b> (1.39, 5.10) |
|                                                                           | <b>5.05</b> (3.17, 6.9)   | <b>4.6</b> (2.93, 6.21)                                                        | Low fat                  | <b>1.55</b> (0.64, 2.46)    | 0.24 (-0.98, 1.45)       | <b>4.22</b> (2.02, 6.38)    | -0.62 (-2.06, 0.83)         | -0.14 (-2.29, 2.06)         | 1.72 (-1.65, 5.17)       | -0.12 (-4.24, 4.01) | -0.44 (-3.54, 2.64)  | -1.48 (-4.51, 1.55)       | <b>6.09</b> (2.12, 10.09) | -0.25 (-3.69, 3.15) | NA                 | 0.14 (-1.61, 1.88)       | 0.08 (-1.16, 1.34)       |
|                                                                           | <b>6.78</b> (4.71, 8.83)  | <b>6.32</b> (4.44, 8.18)                                                       | <b>1.72</b> (0.76, 2.71) | Atkins                      | -1.3 (-2.82, 0.19)       | <b>2.67</b> (0.32, 4.98)    | -2.17 (-3.85, -0.47)        | -1.68 (-3.91, 0.58)         | 0.17 (-3.32, 3.75)       | -1.67 (-5.89, 2.56) | -1.99 (-5.19, 1.2)   | -3.03 (-6.17, 0.11)       | <b>4.55</b> (0.46, 8.64)  | -1.80 (-5.36, 1.71) | NA                 | -1.41 (-3.32, 0.49)      | -1.47 (-2.93, 0.01)      |
|                                                                           | 1.05 (-2.49, 4.59)        | 0.60 (-3.35, 4.49)                                                             | -4.00 (-7.99, 0)         | <b>-5.72</b> (-9.83, -1.64) | DASH                     | <b>3.98</b> (1.62, 6.30)    | -0.87 (-2.43, 0.75)         | -0.38 (-2.76, 2.05)         | 1.47 (-1.99, 5.04)       | -0.36 (-4.65, 3.94) | -0.68 (-3.81, 2.46)  | -1.73 (-4.80, 1.36)       | <b>5.85</b> (1.69, 10.04) | -0.49 (-3.92, 2.91) | NA                 | -0.11 (-1.98, 1.78)      | -0.17 (-1.86, 1.58)      |
|                                                                           | <b>6.37</b> (3.45, 9.28)  | <b>5.92</b> (3.47, 8.33)                                                       | 1.32 (-1.57, 4.23)       | -0.41 (-3.45, 2.63)         | <b>5.33</b> (0.74, 9.89) | Jenny Craig                 | <b>-4.85</b> (-7.29, -2.32) | <b>-4.36</b> (-7.22, -1.41) | -2.51 (-6.43, 1.55)      | -4.34 (-8.98, 0.33) | -4.67 (-8.13, -1.16) | -5.71 (-9.12, -2.24)      | 1.87 (-2.64, 6.43)        | -4.47 (-8.41, 0.53) | NA                 | -4.09 (-6.39, -1.75)     | -4.15 (-6.58, -1.63)     |
|                                                                           | <b>2.18</b> (0.54, 3.91)  | 1.72 (-0.50, 4.01)                                                             | -2.88 (-5.08, -0.54)     | -4.60 (-6.99, -2.11)        | 1.12 (-2.72, 5.10)       | <b>-4.19</b> (-7.42, -0.86) | Mediterranean               | 0.49 (-2.04, 3.02)          | 2.34 (-0.89, 5.64)       | 0.50 (-3.88, 4.86)  | 0.18 (-3.06, 3.39)   | -0.86 (-4.05, 2.30)       | <b>6.72</b> (2.48, 10.94) | 0.38 (-3.13, 3.80)  | NA                 | 0.76 (-1.31, 2.79)       | 0.70 (-1.19, 2.60)       |
|                                                                           | <b>3.96</b> (0.41, 7.51)  | <b>3.51</b> (0.03, 6.93)                                                       | -1.09 (-4.14, 1.96)      | -2.82 (-5.91, 0.26)         | 2.91 (-2.10, 7.93)       | -2.41 (-6.62, 1.79)         | 1.78 (-2.07, 5.52)          | Ornish                      | 1.85 (-2.13, 5.89)       | 0.01 (-4.65, 4.67)  | -0.3 (-3.92, 3.26)   | -1.35 (-4.92, 2.19)       | <b>6.23</b> (1.68, 10.76) | -0.11 (-4.15, 3.84) | NA                 | 0.27 (-2.22, 2.72)       | 0.21 (-2.11, 2.53)       |
|                                                                           | <b>9.98</b> (3.46, 16.50) | <b>9.53</b> (3.06, 15.99)                                                      | 4.93 (-1.32, 11.19)      | 3.21 (-3.13, 9.54)          | 8.94 (1.53, 16.33)       | 3.61 (-3.29, 10.5)          | 7.79 (1.13, 14.42)          | 6.03 (-0.93, 12.96)         | Paleolithic              | -1.84 (-7.24, 3.48) | -2.15 (-6.72, 2.31)  | -3.20 (-7.72, 1.22)       | 4.38 (-0.90, 9.60)        | -1.96 (-6.73, 2.66) | NA                 | -1.58 (-5.37, 2.12)      | -1.64 (-5.29, 1.95)      |
|                                                                           | NA                        | NA                                                                             | NA                       | NA                          | NA                       | NA                          | NA                          | NA                          | NA                       | Portfolio           | -0.32 (-5.48, 4.84)  | -1.36 (-6.48, 3.75)       | <b>6.21</b> (0.47, 11.95) | -0.13 (-5.51, 5.22) | NA                 | 0.25 (-4.22, 4.73)       | 0.20 (-4.11, 4.51)       |
| <b>3.98</b> (1.29, 6.81)                                                  | <b>3.53</b> (0.91, 6.25)  | -1.07 (-3.88, 1.92)                                                            | -2.80 (-5.72, 0.28)      | 2.93 (-1.47, 7.49)          | -2.38 (-5.92, 1.28)      | 1.80 (-1.31, 4.97)          | 0.02 (-4.08, 4.29)          | -6.00 (-12.85, 0.94)        | NA                       | Rosemary Conley     | -1.04 (-4.51, 2.42)  | <b>6.53</b> (1.51, 11.58) | 0.19 (-4.25, 4.60)        | NA                  | 0.58 (-2.40, 3.55) | 0.52 (-2.75, 3.82)       |                          |

|                            |                            |                           |                             |                            |                      |                           |                           |                       |    |                           |                    |                              |                       |                     |                              |                              |
|----------------------------|----------------------------|---------------------------|-----------------------------|----------------------------|----------------------|---------------------------|---------------------------|-----------------------|----|---------------------------|--------------------|------------------------------|-----------------------|---------------------|------------------------------|------------------------------|
| 2.32 (-0.66, 5.36)         | 1.86 (-1.04, 4.80)         | -2.73 (-5.85, 0.50)       | -4.46 (-7.71, -1.13)        | 1.27 (-3.34, 5.93)         | -4.05 (-7.79, -0.24) | 0.15 (-3.27, 3.5)         | -1.64 (-6, 2.8)           | -7.65 (-14.66, -0.62) | NA | -1.66 (-5.06, 1.65)       | Slimming World     | <b>7.58 (2.57, 12.59)</b>    | 1.23 (-3.17, 5.60)    | NA                  | 1.62 (-1.31, 4.55)           | 1.56 (-1.66, 4.81)           |
| <b>11.15 (6.70, 15.57)</b> | <b>10.70 (6.32, 15.01)</b> | <b>6.10 (2.08, 10.11)</b> | <b>4.37 (0.23, 8.)</b>      | <b>10.10 (4.42, 15.74)</b> | 4.78 (-0.20, 9.72)   | <b>8.97 (4.30, 13.52)</b> | <b>7.19 (2.12, 12.22)</b> | 1.16 (-6.28, 8.61)    | NA | <b>7.16 (2.14, 12.05)</b> | 8.83 (3.67, 13.90) | South Beach                  | -6.34 (-11.62, -1.11) | NA                  | <b>-5.96 (-10.31, -1.62)</b> | <b>-6.01 (-10.20, -1.85)</b> |
| 2.88 (-0.37, 6.15)         | 2.43 (-1.27, 6.10)         | -2.17 (-5.90, 1.61)       | <b>-3.89 (-7.74, -0.02)</b> | 1.83 (-2.98, 6.65)         | -3.49 (-7.87, 0.88)  | 0.71 (-3.03, 4.33)        | -1.08 (-5.88, 3.76)       | -7.11 (-14.36, 0.22)  | NA | -1.10 (-5.45, 3.10)       | 0.56 (-3.91, 4.98) | -8.27 (-13.76, -2.75)        | The Biggest Loser     | NA                  | 0.39 (-3.29, 4.08)           | 0.33 (-3.26, 3.99)           |
| <b>7.25 (3.01, 11.48)</b>  | <b>6.80 (2.63, 10.92)</b>  | 2.20 (-1.61, 6.01)        | 0.48 (-3.47, 4.40)          | 6.20 (0.67, 11.72)         | 0.88 (-3.90, 5.67)   | <b>5.07 (0.58, 9.45)</b>  | 3.29 (-1.60, 8.16)        | -2.73 (-10.04, 4.58)  | NA | 3.27 (-1.59, 7.96)        | 4.93 (-0.07, 9.86) | -3.89 (-9.42, 1.64)          | 4.37 (-0.98, 9.72)    | Volumetrics         | NA                           | NA                           |
| <b>4.18 (2.45, 5.97)</b>   | <b>3.73 (2.40, 5.08)</b>   | -0.87 (-2.66, 0.99)       | -2.6 (-4.59, 0.55)          | 3.13 (-0.78, 7.11)         | -2.19 (-4.90, 0.57)  | 2.00 (-0.33, 4.29)        | 0.22 (-3.28, 3.80)        | -5.80 (-12.31, 0.73)  | NA | 0.20 (-2.52, 2.82)        | 1.86 (-1.08, 4.79) | -6.97 (-11.33, -2.51)        | 1.30 (-2.38, 5.03)    | -3.07 (-7.26, 1.17) | Weight Watchers              | -0.06 (-2.09, 2.00)          |
| <b>5.21 (2.94, 7.50)</b>   | <b>4.75 (2.66, 6.85)</b>   | 0.16 (-1.14, 1.51)        | <b>-1.57 (-3.10, -0.02)</b> | 4.16 (-0.03, 8.39)         | -1.16 (-4.33, 2.05)  | <b>3.03 (0.38, 5.62)</b>  | 1.25 (-1.85, 4.38)        | -4.78 (-11.16, 1.64)  | NA | 1.23 (-2.00, 4.34)        | 2.89 (-0.57, 6.30) | <b>-5.94 (-10.15, -1.67)</b> | 2.33 (-1.65, 6.31)    | -2.04 (-6.06, 2.01) | 1.03 (-1.22, 3.26)           | Zone                         |

The values correspond to the difference in median weight loss between the row and column at 6 months (e.g., the difference in median weight loss between the Atkins diet and Usual diet at 6 months is 4.68 kg when restricting to low risk of bias studies). Diets with underline indicate statistical significance change compared with the primary analysis between diets and usual diet.

Table S44: 6-month weight loss across all individual popular diets when restricted to studies without diet company support ( $\beta$ -coefficient =1.65, 95%CrI: -0.60 to 3.81)

|                           |                           |                          |                             |                     |                     |                     |                     |                     |                     |                     |                    |                    |      |  |
|---------------------------|---------------------------|--------------------------|-----------------------------|---------------------|---------------------|---------------------|---------------------|---------------------|---------------------|---------------------|--------------------|--------------------|------|--|
| Usual diet                |                           |                          |                             |                     |                     |                     |                     |                     |                     |                     |                    |                    |      |  |
| 0.08 (-1.39, 1.64)        | Dietary advice            |                          |                             |                     |                     |                     |                     |                     |                     |                     |                    |                    |      |  |
| <b>3.37 (2.12, 4.67)</b>  | <b>3.29 (1.77, 4.77)</b>  | Low fat advice           |                             |                     |                     |                     |                     |                     |                     |                     |                    |                    |      |  |
| <b>5.34 (3.82, 6.9)</b>   | <b>5.25 (3.52, 6.94)</b>  | <b>1.96 (1.01, 2.91)</b> | Atkins                      |                     |                     |                     |                     |                     |                     |                     |                    |                    |      |  |
| <b>3.55 (2.33, 4.8)</b>   | <b>3.46 (1.83, 5.05)</b>  | 0.17 (-1.25, 1.58)       | <b>-1.79 (-3.46, -0.13)</b> | DASH                |                     |                     |                     |                     |                     |                     |                    |                    |      |  |
| <b>3.49 (-3.50, 10.5)</b> | <b>3.4 (-3.60, 10.37)</b> | 0.11 (-6.93, 7.14)       | -1.85 (-8.93, 5.22)         | -0.06 (-7.12, 7.00) | Jenny Craig         |                     |                     |                     |                     |                     |                    |                    |      |  |
| <b>2.44 (0.93, 4.06)</b>  | <b>2.35 (0.46, 4.28)</b>  | -0.94 (-2.52, 0.71)      | <b>-2.9 (-4.71, -1.02)</b>  | -1.11 (-2.91, 0.77) | -1.04 (-8.17, 6.08) | Mediterranean       |                     |                     |                     |                     |                    |                    |      |  |
| <b>3.37 (0.94, 5.88)</b>  | <b>3.28 (0.90, 5.67)</b>  | -0.01 (-2.24, 2.28)      | -1.97 (-4.28, 0.39)         | -0.18 (-2.70, 2.40) | -0.12 (-7.38, 7.18) | 0.93 (-1.76, 3.61)  | Ornish              |                     |                     |                     |                    |                    |      |  |
| <b>4.91 (1.39, 8.59)</b>  | <b>4.82 (1.14, 8.62)</b>  | 1.53 (-1.95, 5.14)       | -0.43 (-4.03, 3.3)          | 1.36 (-2.28, 5.13)  | 1.44 (-6.38, 9.25)  | 2.46 (-0.88, 5.88)  | 1.54 (-2.57, 5.73)  | Paleolithic         |                     |                     |                    |                    |      |  |
| 3.26 (-1.19, 7.73)        | 3.18 (-1.39, 7.68)        | -0.11 (-4.39, 4.16)      | -2.08 (-6.46, 2.30)         | -0.29 (-4.78, 4.20) | -0.23 (-8.45, 8.01) | 0.82 (-3.78, 5.35)  | -0.11 (-4.97, 4.69) | -1.65 (-7.28, 3.87) | Portfolio           |                     |                    |                    |      |  |
| <b>3.58 (0.84, 6.45)</b>  | <b>3.49 (0.74, 6.3)</b>   | 0.2 (-2.61, 3.11)        | -1.76 (-4.65, 1.23)         | 0.03 (-2.86, 3.02)  | 0.10 (-7.28, 7.5)   | 1.14 (-1.93, 4.24)  | 0.22 (-3.22, 3.67)  | -1.33 (-5.79, 3.11) | 0.32 (-4.8, 5.51)   | Rosemary Conley     |                    |                    |      |  |
| 1.95 (-1.12, 5.09)        | 1.87 (-1.2, 4.92)         | -1.42 (-4.57, 1.76)      | <b>-3.39 (-6.63, -0.11)</b> | -1.6 (-4.80, 1.65)  | -1.53 (-9.03, 5.99) | -0.49 (-3.88, 2.86) | -1.41 (-5.14, 2.29) | -2.95 (-7.65, 1.64) | -1.31 (-6.63, 4.04) | -1.62 (-5.13, 1.81) | Slimming World     |                    |      |  |
| <b>3.52 (1.50, 5.61)</b>  | <b>3.44 (1.51, 5.35)</b>  | 0.15 (-1.89, 2.20)       | -1.81 (-3.96, 0.35)         | -0.02 (-2.20, 2.19) | 0.04 (-6.95, 7.03)  | 1.08 (-1.33, 3.46)  | 0.16 (-2.62, 2.9)   | -1.38 (-5.43, 2.56) | 0.27 (-4.47, 5.03)  | -0.06 (-2.96, 2.79) | 1.57 (-1.59, 4.73) | Weight Watchers    |      |  |
| <b>3.67 (1.97, 5.44)</b>  | <b>3.58 (1.70, 5.46)</b>  | 0.30 (-0.92, 1.54)       | -1.67 (-3.13, -0.18)        | 0.12 (-1.70, 1.98)  | 0.19 (-6.91, 7.32)  | 1.23 (-0.79, 3.22)  | 0.31 (-2.10, 2.68)  | -1.23 (-5.03, 2.46) | 0.41 (-4.03, 4.88)  | 0.09 (-3.00, 3.12)  | 1.72 (-1.65, 5.07) | 0.14 (-2.13, 2.43) | Zone |  |

The values correspond to the difference in median weight loss between the row and column at 6 months (e.g., the difference in median weight loss between the Atkins diet and Usual diet at 6 months is 5.34 kg when restricting to studies without diet company support).

Table S45: 6-month weight loss across all individual popular diets accounting for both of behavior support and exercise

|                              |                              |                             |                             |                              |                         |                              |                              |                         |                         |                       |                              |             |  |  |  |  |  |  |
|------------------------------|------------------------------|-----------------------------|-----------------------------|------------------------------|-------------------------|------------------------------|------------------------------|-------------------------|-------------------------|-----------------------|------------------------------|-------------|--|--|--|--|--|--|
| Usual diet                   |                              |                             |                             |                              |                         |                              |                              |                         |                         |                       |                              |             |  |  |  |  |  |  |
| 1.41 (-0.34, 3.20)           | Dietary advice               |                             |                             |                              |                         |                              |                              |                         |                         |                       |                              |             |  |  |  |  |  |  |
| <b>4.87</b><br>(2.99, 6.81)  | <b>3.47</b><br>(2.04, 4.90)  | Low fat                     |                             |                              |                         |                              |                              |                         |                         |                       |                              |             |  |  |  |  |  |  |
| <b>6.55</b><br>(4.58, 8.56)  | <b>5.14</b><br>(3.60, 6.68)  | 1.67<br>(1.00, 2.35)        | Atkins                      |                              |                         |                              |                              |                         |                         |                       |                              |             |  |  |  |  |  |  |
| <b>5.00</b><br>(3.00, 7.05)  | <b>3.60</b><br>(1.76, 5.39)  | 0.13 (-1.26, 1.48)          | <b>-1.55</b> (-3.09, -0.05) | DASH                         |                         |                              |                              |                         |                         |                       |                              |             |  |  |  |  |  |  |
| <b>7.22</b><br>(3.74, 10.80) | <b>5.81</b><br>(2.75, 8.90)  | 2.34 (-1.03, 5.74)          | 0.67 (-2.75, 4.12)          | 2.22 (-1.30, 5.82)           | Jenny Craig             |                              |                              |                         |                         |                       |                              |             |  |  |  |  |  |  |
| <b>4.70</b><br>(2.16, 7.33)  | <b>3.29</b><br>(1.14, 5.48)  | -0.18 (-1.91, 1.58)         | -1.85 (-3.72, 0.03)         | -0.30 (-2.48, 1.92)          | -2.52 (-6.30, 1.25)     | Mediterranean                |                              |                         |                         |                       |                              |             |  |  |  |  |  |  |
| <b>4.63</b><br>(2.04, 7.29)  | <b>3.23</b><br>(1.07, 5.41)  | -0.25 (-2.27, 1.81)         | -1.92 (-3.99, 0.18)         | -0.37 (-2.75, 2.08)          | -2.59 (-6.34, 1.17)     | -0.07 (-2.72, 2.59)          | Ornish                       |                         |                         |                       |                              |             |  |  |  |  |  |  |
| <b>6.87</b><br>(3.05, 10.78) | <b>5.47</b><br>(1.88, 9.10)  | 2.00 (-1.34, 5.39)          | 0.32 (-3.08, 3.78)          | 1.87 (-1.72, 5.52)           | -0.35 (-5.09, 4.39)     | 2.17 (-0.94, 5.32)           | 2.24 (-1.68, 6.17)           | Paleolithic             |                         |                       |                              |             |  |  |  |  |  |  |
| -25.57 (-157.20, 87.76)      | -26.81 (-158.50, 86.45)      | -30.24 (-161.90, 82.87)     | -31.92 (-163.50, 81.23)     | -30.4 (-162.00, 82.76)       | -32.67 (-164.50, 80.54) | -29.88 (-161.60, 83.13)      | -30.00 (-161.70, 83.25)      | -32.10 (-163.90, 80.96) | Portfolio               |                       |                              |             |  |  |  |  |  |  |
| 8.46 (-56.01, 75.26)         | 7.18 (-57.56, 73.76)         | 3.73 (-61.06, 70.28)        | 2.04 (-62.72, 68.62)        | 3.60 (-61.14, 70.27)         | 1.35 (-63.42, 68.02)    | 3.90 (-61.00, 70.56)         | 3.94 (-60.77, 70.64)         | 1.70 (-63.15, 68.53)    | 31.05 (-122.90, 175.30) | Rosemary Conley       |                              |             |  |  |  |  |  |  |
| 2.81 (-0.35, 5.97)           | 1.41 (-1.32, 4.10)           | -2.07 (-4.95, 0.78)         | -3.74 (-6.68, 0.84)         | -2.19 (-5.28, 0.87)          | -4.41 (-8.53, 0.35)     | -1.89 (-5.20, 1.38)          | -1.82 (-5.20, 1.49)          | -4.06 (-8.48, 0.27)     | 28.23 (-84.96, 159.80)  | -5.79 (-72.42, 59.01) | Slimming World               |             |  |  |  |  |  |  |
| 10.98 (6.74, 15.24)          | <b>9.57</b><br>(5.52, 13.63) | <b>6.10</b><br>(2.32, 9.88) | <b>4.43</b><br>(0.59, 8.27) | <b>5.97</b><br>(1.96, 10.01) | 3.76 (-1.37, 8.85)      | <b>6.27</b><br>(2.10, 10.45) | <b>6.35</b><br>(2.05, 10.64) | 4.10 (-0.98, 9.14)      | 36.37 (-76.91, 168.00)  | 2.42 (-64.44, 67.26)  | <b>8.17</b><br>(3.44, 12.93) | South Beach |  |  |  |  |  |  |



|                           |                          |                       |                             |                      |                      |                     |                     |                      |                         |                       |                       |                              |                        |                     |                    |      |
|---------------------------|--------------------------|-----------------------|-----------------------------|----------------------|----------------------|---------------------|---------------------|----------------------|-------------------------|-----------------------|-----------------------|------------------------------|------------------------|---------------------|--------------------|------|
| 92.30 (-0.02, 219.40)     | 90.98 (-1.32, 218.20)    | 87.53 (-4.71, 214.70) | 85.84 (-6.40, 213)          | 87.41 (-4.75, 214.5) | 85.22 (-7.45, 212.4) | 87.71 (-4.58, 215)  | 87.75 (-4.54, 215)  | 85.55 (-6.84, 212.9) | 123.10 (-25.82, 326.20) | 85.58 (-35.08, 241.5) | 89.61 (-2.76, 216.90) | 81.39 (-11.07, 208.70)       | The Biggest Loser      |                     |                    |      |
| <b>7.08 (3.07, 11.12)</b> | <b>5.67 (1.84, 9.51)</b> | 2.20 (-1.36, 5.76)    | 0.53 (-3.10, 4.14)          | 2.08 (-1.73, 5.90)   | -0.14 (-5.06, 4.75)  | 2.37 (-1.59, 6.33)  | 2.45 (-1.67, 6.53)  | 0.21 (-4.70, 5.06)   | 32.40 (-80.73, 164.00)  | -1.51 (-68.33, 63.37) | 4.27 (-0.29, 8.85)    | -3.90 (-9.10, 1.28)          | -85.35 (-212.60, 6.98) | Volumetrics         |                    |      |
| <b>4.27 (1.94, 6.60)</b>  | <b>2.86 (1.26, 4.44)</b> | -0.61 (-2.33, 1.12)   | <b>-2.29 (-4.09, -0.47)</b> | -0.74 (-2.83, 1.40)  | -2.96 (-6.44, 0.49)  | -0.44 (-2.82, 1.92) | -0.36 (-2.82, 2.04) | -2.61 (-6.37, 1.11)  | 29.67 (-83.58, 161.30)  | -4.34 (-70.88, 60.41) | 1.46 (-1.33, 4.26)    | <b>-6.71 (-10.89, -2.56)</b> | -88.23 (-215.40, 4.19) | -2.82 (-6.77, 1.15) | Weight Watchers    |      |
| <b>5.14 (3.04, 7.30)</b>  | <b>3.74 (2.05, 5.44)</b> | 0.27 (-0.73, 1.28)    | <b>-1.41 (-2.56, -0.25)</b> | 0.14 (-1.52, 1.86)   | -2.08 (-5.60, 1.42)  | 0.44 (-1.57, 2.44)  | 0.51 (-1.64, 2.65)  | -1.73 (-5.24, 1.76)  | 30.51 (-82.66, 162.20)  | -3.45 (-70.05, 61.30) | 2.33 (-0.64, 5.35)    | <b>-5.83 (-9.73, -1.92)</b>  | -87.28 (-214.50, 4.96) | -1.94 (-5.63, 1.77) | 0.88 (-1.05, 2.82) | Zone |

The values correspond to the difference in median weight loss between the row and column at 6 months (eg, the difference in median weight loss between the Atkins diet and Usual diet at 6 months is 6.55 kg).

Table S46: 6-month SBP reduction across all individual popular diets when restricted to overweight/obese yet otherwise healthy populations (below left) and restricted to low risk of bias studies (above right)

|                                                                            |                            | Low risk of bias studies ( $\beta$ -coefficient = 0.29, 95%CrI: -3.21 to 3.78) |                            |                            |                          |                           |                          |                              |                            |                    |                      |                               |    |                        |                               |
|----------------------------------------------------------------------------|----------------------------|--------------------------------------------------------------------------------|----------------------------|----------------------------|--------------------------|---------------------------|--------------------------|------------------------------|----------------------------|--------------------|----------------------|-------------------------------|----|------------------------|-------------------------------|
| Healthy populations ( $\beta$ -coefficient = -1.03, 95%CrI: -4.28 to 2.27) | Usual diet                 | 1.48 (-1.83, 4.75)                                                             | <b>3.21 (0.64, 5.80)</b>   | <b>4.24 (1.23, 7.26)</b>   | <b>4.68 (2.68, 6.79)</b> | <b>7.13 (0.48, 13.78)</b> | <b>3.06 (0.95, 5.27)</b> | 0.38 (-3.74, 4.47)           | <b>13.86 (6.34, 21.41)</b> | NA                 | 5.23 (-0.39, 10.86)  | 3.18 (-1.70, 8.05)            | NA | 3.42 (-0.50, 7.47)     | 3.18 (-0.26, 6.72)            |
|                                                                            | -0.38 (-4.48, 3.59)        | Dietary advice                                                                 | 1.73 (-1.42, 4.94)         | 2.75 (-0.62, 6.19)         | <b>3.19 (0.24, 6.36)</b> | 5.65 (-1.24, 12.56)       | 1.58 (-1.81, 5.11)       | -1.10 (-5.10, 2.90)          | <b>12.39 (4.68, 20.16)</b> | NA                 | 3.75 (-2.18, 9.72)   | 1.70 (-4.16, 7.61)            | NA | 1.93 (-0.52, 4.59)     | 1.70 (-1.72, 5.25)            |
|                                                                            | <b>5.67 (1.64, 9.47)</b>   | <b>6.06 (3.02, 8.97)</b>                                                       | Low fat                    | 1.03 (-0.91, 2.68)         | 1.46 (-0.91, 3.98)       | 3.92 (-2.20, 10.02)       | -0.15 (-3.06, 2.83)      | -2.84 (-6.31, 0.62)          | <b>10.66 (3.56, 17.73)</b> | NA                 | 2.01 (-2.99, 7.02)   | -0.03 (-5.56, 5.47)           | NA | 0.21 (-3.56, 4.09)     | -0.03 (-2.64, 2.66)           |
|                                                                            | <b>6.27 (2.28, 10.16)</b>  | <b>6.67 (3.56, 9.81)</b>                                                       | 0.60 (-0.73, 2.11)         | Atkins                     | 0.44 (-2.39, 3.40)       | 2.89 (-4.18, 9.22)        | -1.18 (-4.47, 2.18)      | -3.86 (-7.41, 0.34)          | <b>9.63 (2.36, 16.90)</b>  | NA                 | 0.99 (-4.26, 6.26)   | -1.06 (-6.81, 4.65)           | NA | -0.82 (-4.75, 3.23)    | -1.06 (-3.85, 1.81)           |
|                                                                            | NA                         | NA                                                                             | NA                         | NA                         | DASH                     | 2.45 (-4.18, 9.00)        | -1.62 (-4.28, 1.03)      | <b>-4.30 (-10.83, -0.37)</b> | <b>9.18 (1.66, 16.64)</b>  | NA                 | 0.56 (-5.10, 6.06)   | -1.49 (-6.86, 3.71)           | NA | -1.26 (-5.08, 2.53)    | -1.50 (-4.87, 1.84)           |
|                                                                            | NA                         | NA                                                                             | NA                         | NA                         | NA                       | Jenny Craig               | -4.07 (-10.83, 2.78)     | -6.75 (-13.81, 0.23)         | 6.75 (-2.63, 16.06)        | NA                 | -1.91 (-9.82, 6.01)  | -3.95 (-12.2, 4.25)           | NA | -3.70 (-10.90, 3.57)   | -3.95 (-10.58, 2.74)          |
|                                                                            | <b>3.67 (0.50, 7.12)</b>   | 4.09 (-1.02, 9.39)                                                             | -1.94 (-7.00, 3.28)        | -2.53 (-7.67, 2.64)        | NA                       | NA                        | Mediterranean            | -2.68 (-7.06, 1.58)          | <b>10.81 (3.08, 18.46)</b> | NA                 | 2.18 (-3.69, 7.93)   | 0.13 (-5.30, 5.39)            | NA | 0.36 (-3.76, 4.49)     | 0.12 (-3.62, 3.86)            |
|                                                                            | 3.00 (-1.97, 7.82)         | 3.41 (-0.78, 7.44)                                                             | -2.66 (-5.76, 0.50)        | -3.26 (-6.75, 0.07)        | NA                       | NA                        | -0.70 (-6.77, 5.12)      | Ornish                       | <b>13.50 (5.63, 21.32)</b> | NA                 | 4.85 (-1.23, 10.95)  | 2.81 (-3.56, 9.20)            | NA | 3.04 (-1.35, 7.58)     | 2.80 (-0.81, 6.54)            |
|                                                                            | <b>16.41 (9.01, 23.58)</b> | <b>16.78 (9.85, 23.58)</b>                                                     | <b>10.72 (4.57, 16.87)</b> | <b>10.11 (3.70, 16.33)</b> | NA                       | NA                        | 12.65 (4.63, 20.57)      | 13.36 (6.51, 20.33)          | Paleolithic                | NA                 | -8.65 (-17.26, 0.05) | <b>-10.69 (-19.62, -1.70)</b> | NA | -10.45 (-18.43, -2.37) | <b>-10.69 (-18.19, -3.10)</b> |
|                                                                            | 2.78 (-1.90, 7.48)         | 3.20 (-1.55, 7.85)                                                             | -2.88 (-7.47, 1.80)        | -3.48 (-8.06, 1.11)        | NA                       | NA                        | -0.93 (-6.75, 4.72)      | -0.21 (-5.71, 5.29)          | -13.59 (-21.19, -5.87)     | Rosemary Conley    | NA                   | NA                            | NA | NA                     | NA                            |
|                                                                            | NA                         | NA                                                                             | NA                         | NA                         | NA                       | NA                        | NA                       | NA                           | NA                         | NA                 | Portfolio            | -2.05 (-9.51, 5.41)           | NA | -1.82 (-8.06, 4.58)    | -2.05 (-7.67, 3.68)           |
|                                                                            | 3.16 (-0.17, 6.5)          | 3.55 (-1.66, 8.78)                                                             | -2.53 (-7.50, 2.73)        | -3.10 (-8.21, 2.10)        | NA                       | NA                        | -0.53 (-5.34, 4.06)      | 0.15 (-5.68, 6.16)           | -13.22 (-21.14, -5.19)     | 0.42 (-5.42, 6.13) | NA                   | The Biggest Loser             | NA | 0.24 (-5.98, 6.61)     | 0.00 (-5.96, 6.05)            |

|  |                                           |                                           |                     |                             |    |    |                     |                     |                               |                     |    |                     |                     |                    |                     |
|--|-------------------------------------------|-------------------------------------------|---------------------|-----------------------------|----|----|---------------------|---------------------|-------------------------------|---------------------|----|---------------------|---------------------|--------------------|---------------------|
|  | 4.67 (-1.88, 10.97)                       | 5.05 (-1.00, 10.93)                       | -1.01 (-6.21, 4.14) | -1.60 (-6.99, 3.71)         | NA | NA | 0.95 (-6.40, 8.04)  | 1.66 (-4.47, 7.66)  | <b>-11.74</b> (-19.71, -3.52) | 1.87 (-5.02, 8.65)  | NA | 1.50 (-5.82, 8.65)  | Volumetrics         | NA                 | NA                  |
|  | 2.56 (-1.42, 6.37)                        | <b>2.93</b> ( <b>0.76</b> , <b>5.10</b> ) | -3.14 (-6.3, 0.18)  | <b>-3.72</b> (-7.05, -0.44) | NA | NA | -1.16 (-6.34, 3.87) | -0.47 (-4.76, 3.93) | -13.84 (-20.76, -6.80)        | -0.25 (-4.71, 4.24) | NA | -0.64 (-5.73, 4.46) | -2.13 (-8.12, 4.04) | Weight Watchers    | -0.24 (-4.31, 3.81) |
|  | <b>4.84</b> ( <b>0.49</b> , <b>9.12</b> ) | <b>5.25</b> ( <b>2.00</b> , <b>8.39</b> ) | -0.84 (-2.98, 1.44) | -1.41 (-4.00, 1.07)         | NA | NA | 1.12 (-4.37, 6.56)  | 1.82 (-1.30, 5.02)  | <b>-11.55</b> (-18.10, -5.02) | 2.08 (-2.88, 6.96)  | NA | 1.69 (-3.80, 7.03)  | 0.17 (-5.36, 5.84)  | 2.33 (-1.23, 5.79) | Zone                |

The values correspond to the difference in median SBP reduction between the row and column at 6 months (e.g., the difference in median SBP reduction between the Atkins diet and usual diet at 6 months is 4.24 mm Hg when restricting to low risk of bias studies). NA means not available in this subgroup. Diets with underline indicate statistical significance change compared with the primary analysis between diets and usual diet.

Table S47: 6-month SBP reduction across all individual popular diets when restricted to studies without diet company support ( $\beta$ -coefficient = 0.29, 95%CrI: -3.19 to 3.70)

|                            |                            |                            |                           |                           |                            |                               |                      |                     |                     |      |
|----------------------------|----------------------------|----------------------------|---------------------------|---------------------------|----------------------------|-------------------------------|----------------------|---------------------|---------------------|------|
| Usual diet                 |                            |                            |                           | -                         | -                          |                               |                      |                     | -                   | -    |
| 1.23 (-2.53, 4.90)         | Dietary advice             |                            |                           |                           |                            |                               |                      |                     |                     |      |
| 2.78 (-0.79, 6.29)         | 1.55 (-2.82, 5.93)         | Low fat                    |                           |                           |                            |                               |                      |                     |                     |      |
| 3.53 (-0.62, 7.75)         | 2.30 (-2.54, 7.29)         | 0.76 (-1.43, 3.06)         | Atkins                    |                           |                            |                               |                      |                     |                     |      |
| <b>4.30 (1.64, 7.07)</b>   | 3.07 (-0.55, 6.90)         | 1.52 (-1.66, 4.89)         | 0.78 (-3.17, 4.75)        | DASH                      |                            |                               |                      |                     |                     |      |
| <b>3.16 (0.41, 5.95)</b>   | 1.93 (-1.93, 5.89)         | 0.39 (-3.50, 4.37)         | -0.37 (-4.91, 4.14)       | -1.14 (-4.70, 2.34)       | Mediterranean              |                               |                      |                     |                     |      |
| <b>13.42 (4.74, 22.06)</b> | <b>12.20 (3.19, 21.21)</b> | <b>10.65 (2.74, 18.56)</b> | <b>9.90 (1.63, 18.08)</b> | <b>9.12 (0.50, 17.64)</b> | <b>10.26 (1.36, 19.06)</b> | Paleolithic                   |                      |                     |                     |      |
| 4.81 (-2.30, 11.86)        | 3.57 (-3.95, 11.12)        | 2.03 (-4.09, 8.17)         | 1.28 (-5.32, 7.74)        | 0.51 (-6.53, 7.36)        | 1.65 (-5.69, 8.86)         | -8.64 (-18.63, 1.35)          | Portfolio            |                     |                     |      |
| 3.15 (-2.89, 9.17)         | 1.91 (-5.11, 9.03)         | 0.37 (-6.60, 7.37)         | -0.37 (-7.77, 6.91)       | -1.15 (-7.84, 5.41)       | -0.01 (-6.66, 6.60)        | -10.28 (-20.81, 0.28)         | -1.65 (-10.93, 7.65) | The Biggest Loser   |                     |      |
| 2.70 (-1.59, 7.01)         | 1.46 (-2.06, 5.11)         | -0.07 (-5.13, 5.06)        | -0.82 (-6.42, 4.70)       | -1.60 (-6.18, 2.89)       | -0.46 (-5.15, 4.20)        | <b>-10.73 (-20.04, -1.28)</b> | -2.11 (-10.00, 5.91) | -0.45 (-7.84, 6.96) | Weight Watchers     |      |
| 2.33 (-3.99, 8.48)         | 1.10 (-4.64, 6.76)         | -0.44 (-6.61, 5.60)        | -1.20 (-7.80, 5.18)       | -1.96 (-8.28, 4.08)       | -0.82 (-7.33, 5.47)        | <b>-11.11 (-21.14, -1.16)</b> | -2.46 (-11.15, 6.10) | -0.81 (-9.55, 7.75) | -0.37 (-7.02, 6.11) | Zone |

The values correspond to the difference in median SBP reduction between the row and column at 6 months (e.g., the difference in median SBP reduction between the Atkins diet and usual diet at 6 months is 6.35 mm Hg when restricting to studies without diet company support). NA means not available in this subgroup. Diets with underline indicate statistical significance change compared with the primary analysis between diets and usual diet.

Table S48: 6-month SBP reduction across all individual popular diets accounting for both of behavior support and exercise

|                            |                            |                             |                             |                             |                          |                            |                            |                          |                         |                 |  |  |  |  |
|----------------------------|----------------------------|-----------------------------|-----------------------------|-----------------------------|--------------------------|----------------------------|----------------------------|--------------------------|-------------------------|-----------------|--|--|--|--|
| Usual diet                 |                            |                             |                             |                             |                          |                            |                            |                          |                         |                 |  |  |  |  |
| 0.40 (-2.02, 2.96)         | Dietary advice             |                             |                             |                             |                          |                            |                            |                          |                         |                 |  |  |  |  |
| <b>3.17 (0.89, 5.38)</b>   | <b>2.77 (0.01, 5.34)</b>   | Low fat                     |                             |                             |                          |                            |                            |                          |                         |                 |  |  |  |  |
| <b>4.34 (1.96, 6.80)</b>   | <b>3.94 (1.15, 6.66)</b>   | <b>1.17 (0.02, 2.43)</b>    | Atkins                      |                             |                          |                            |                            |                          |                         |                 |  |  |  |  |
| <b>4.78 (2.17, 7.52)</b>   | <b>4.41 (1.16, 7.54)</b>   | 1.61 (-0.69, 4.12)          | 0.44 (-2.15, 3.09)          | DASH                        |                          |                            |                            |                          |                         |                 |  |  |  |  |
| 18.07 (-84.34, 151.10)     | 17.68 (-84.67, 150.50)     | 14.95 (-87.54, 148.10)      | 13.79 (-88.66, 146.90)      | 13.31 (-89.29, 146.70)      | Jenny Craig              |                            |                            |                          |                         |                 |  |  |  |  |
| <b>3.11 (0.19, 6.08)</b>   | 2.71 (-0.48, 5.86)         | -0.06 (-3.06, 3.04)         | -1.23 (-4.44, 1.96)         | -1.68 (-5.06, 1.67)         | -15.00 (-148.30, 87.56)  | Mediterranean              |                            |                          |                         |                 |  |  |  |  |
| 0.06 (-3.47, 3.53)         | -0.34 (-3.96, 3.07)        | <b>-3.11 (-6.09, -0.13)</b> | <b>-4.28 (-7.36, -1.33)</b> | <b>-4.73 (-8.53, -1.07)</b> | -18.08 (-151.20, 84.42)  | -2.26 (-6.34, 1.66)        | Ornish                     |                          |                         |                 |  |  |  |  |
| <b>13.84 (6.91, 20.81)</b> | <b>13.44 (6.29, 20.53)</b> | <b>10.67 (4.14, 17.30)</b>  | <b>9.51 (2.82, 16.28)</b>   | <b>9.06 (2.03, 15.99)</b>   | -4.19 (-137.50, 98.44)   | <b>11.62 (4.22, 19.02)</b> | <b>13.80 (6.58, 21.12)</b> | Paleolithic              |                         |                 |  |  |  |  |
| 10.97 (-150.00, 118.70)    | 10.39 (-150.20, 118.00)    | 7.71 (-152.70, 115.40)      | 6.53 (-154.00, 114.30)      | 6.13 (-154.40, 113.70)      | -12.06 (-188.40, 137.20) | 3.02 (-2.46, 8.40)         | 10.77 (-149.70, 118.40)    | -3.00 (-165.00, 105.50)  | Portfolio               |                 |  |  |  |  |
| 0.76 (-196.40, 150.40)     | 0.35 (-196.70, 150.20)     | -2.25 (-199.40, 147.10)     | -3.41 (-200.60, 146.00)     | -3.94 (-201.20, 145.60)     | -18.19 (-276.40, 161.70) | -2.31 (-199.40, 147.20)    | 0.99 (-196.20, 150.60)     | -12.88 (-210.20, 136.30) | -7.96 (-260.00, 159.00) | Rosemary Conley |  |  |  |  |

|                         |                         |                          |                          |                          |                          |                          |                         |                               |                          |                         |                         |                     |                    |      |
|-------------------------|-------------------------|--------------------------|--------------------------|--------------------------|--------------------------|--------------------------|-------------------------|-------------------------------|--------------------------|-------------------------|-------------------------|---------------------|--------------------|------|
| -8.46 (-143.90, 154.80) | -8.83 (-144.40, 154.40) | -11.58 (-147.10, 151.70) | -12.81 (-148.30, 150.60) | -13.28 (-148.70, 150.00) | -27.88 (-222.90, 156.50) | -11.51 (-146.80, 151.80) | -8.46 (-144.00, 154.80) | -22.01 (-157.90, 141.10)      | -15.39 (-159.20, 182.00) | -3.89 (-216.50, 263.20) | The Biggest Loser       |                     |                    |      |
| 2.13 (-3.94, 8.22)      | 1.73 (-4.55, 7.94)      | -1.04 (-6.66, 4.65)      | -2.22 (-8.00, 3.57)      | -2.67 (-8.84, 3.47)      | -16.02 (-149.40, 86.41)  | -0.97 (-7.43, 5.40)      | 2.08 (-4.25, 8.48)      | <b>-11.72 (-20.39, -3.02)</b> | -8.98 (-116.40, 152.30)  | 1.10 (-148.60, 198.40)  | 10.45 (-152.80, 146.10) | Volumetrics         |                    |      |
| 1.17 (-2.24, 5.34)      | 0.72 (-2.02, 4.19)      | -1.98 (-5.46, 2.18)      | -3.14 (-6.72, 0.95)      | -3.61 (-7.55, 0.92)      | -16.84 (-149.50, 85.61)  | -1.90 (-5.94, 2.65)      | 1.15 (-2.90, 5.79)      | <b>-12.63 (-20.06, -4.82)</b> | -9.40 (-117.10, 151.30)  | 0.38 (-149.40, 197.20)  | 9.68 (-153.70, 145.30)  | -0.92 (-7.53, 6.15) | Weight Watchers    |      |
| 2.74 (-0.10, 5.68)      | 2.35 (-0.64, 5.27)      | -0.42 (-2.53, 1.82)      | -1.59 (-3.88, 0.70)      | -2.05 (-5.18, 1.09)      | -15.32 (-148.40, 87.05)  | -0.38 (-3.90, 3.21)      | 2.69 (-0.43, 5.93)      | <b>-11.10 (-18.00, -4.16)</b> | -8.05 (-115.90, 152.40)  | 1.86 (-147.70, 199.00)  | 11.16 (-152.40, 146.70) | 0.62 (-5.42, 6.70)  | 1.55 (-2.68, 5.27) | Zone |

The values correspond to the difference in median SBP reduction between the row and column at 6 months (eg, the difference in median SBP reduction between the Atkins diet and Usual diet at 6 months is 4.34 mm Hg).

Table S49: 6-month DBP reduction across all individual popular diets when restricted to overweight/obese yet otherwise healthy populations (below left) and restricted to low risk of bias studies (above right)

|                                                                           |                          | Low risk of bias studies ( $\beta$ -coefficient = 0.05, 95%CrI: -2.80 to 2.96) |                          |                          |                          |                           |                              |                       |                      |                     |                     |                      |                    |                       |                       |
|---------------------------------------------------------------------------|--------------------------|--------------------------------------------------------------------------------|--------------------------|--------------------------|--------------------------|---------------------------|------------------------------|-----------------------|----------------------|---------------------|---------------------|----------------------|--------------------|-----------------------|-----------------------|
|                                                                           |                          | Usual diet                                                                     | 0.54 (-1.82, 2.77)       | <b>1.99 (0.23, 3.80)</b> | <b>3.15 (1.09, 5.24)</b> | <b>2.82 (1.48, 4.25)</b>  | <b>7.55 (2.91, 12.25)</b>    | 1.15 (-0.41, 2.72)    | 0.07 (-2.86, 2.93)   | 3.60 (-1.42, 8.65)  | 3.73 (-0.15, 7.64)  | NA                   | 2.20 (-1.23, 5.63) | NA                    | 1.13 (-1.65, 3.80)    |
| Healthy populations ( $\beta$ -coefficient = 0.81, 95%CrI: -3.14 to 1.49) | 0.53 (-2.26, 3.33)       | Dietary advice                                                                 | 1.46 (-0.69, 3.78)       | <b>2.61 (0.32, 5.08)</b> | <b>2.28 (0.25, 4.57)</b> | <b>7.02 (2.22, 11.96)</b> | 0.62 (-1.77, 3.13)           | -0.46 (-3.24, 2.33)   | 3.07 (-2.07, 8.35)   | 3.19 (-0.84, 7.41)  | NA                  | 1.66 (-2.39, 5.87)   | NA                 | 0.60 (-1.15, 2.36)    | 1.67 (-0.73, 4.24)    |
|                                                                           | <b>3.23 (0.50, 5.96)</b> | <b>2.70 (0.42, 4.96)</b>                                                       | Low fat                  | <b>1.15 (0.03, 2.29)</b> | 0.83 (-0.87, 2.56)       | <b>5.56 (1.26, 9.86)</b>  | -0.85 (-3.00, 1.27)          | -1.93 (-4.48, 0.5)    | 1.60 (-3.10, 6.31)   | 1.74 (-1.73, 5.19)  | NA                  | 0.21 (-3.69, 4.06)   | NA                 | -0.86 (-3.55, 1.67)   | 0.20 (-1.67, 2.10)    |
|                                                                           | <b>4.49 (1.78, 7.22)</b> | <b>3.97 (1.61, 6.30)</b>                                                       | <b>1.26 (0.29, 2.24)</b> | Atkins                   | -0.33 (-2.31, 1.68)      | 4.40 (-0.04, 8.87)        | -2.00 (-4.39, 0.35)          | -3.08 (-5.67, 0.62)   | 0.45 (-4.39, 5.29)   | 0.58 (-3.07, 4.21)  | NA                  | -0.94 (-4.98, 3.03)  | NA                 | -2.02 (-4.80, 0.60)   | -0.95 (-2.93, 1.04)   |
|                                                                           | NA                       | NA                                                                             | NA                       | NA                       | DASH                     | <b>4.73 (0.08, 9.35)</b>  | -1.68 (-3.59, 0.19)          | -2.75 (-5.67, 0.00)   | 0.77 (-4.24, 5.76)   | 0.91 (-2.97, 4.73)  | NA                  | -0.62 (-4.37, 3.05)  | NA                 | -1.68 (-2.94, 0.82)   | -0.63 (-3.00, 1.75)   |
|                                                                           | NA                       | NA                                                                             | NA                       | NA                       | NA                       | Jenny Craig               | <b>-6.41 (-11.24, -1.61)</b> | -7.49 (-12.51, -2.56) | -3.96 (-10.35, 2.42) | -3.82 (-9.35, 1.67) | NA                  | -5.36 (-11.17, 0.41) | NA                 | -6.43 (-11.55, -1.44) | -5.36 (-10.05, -0.66) |
|                                                                           | 0.85 (-1.52, 3.31)       | 0.31 (-3.33, 4.07)                                                             | -2.40 (-6.01, 1.31)      | -3.66 (-7.25, 0.05)      | NA                       | NA                        | Mediterranean                | -1.08 (-4.20, 1.98)   | 2.45 (-2.69, 7.63)   | 2.59 (-1.46, 6.64)  | NA                  | 1.06 (-2.71, 4.83)   | NA                 | -0.01 (-2.94, 2.79)   | 1.05 (-1.60, 3.77)    |
|                                                                           | 1.98 (-1.68, 5.54)       | 1.46 (-1.71, 4.62)                                                             | -1.27 (-3.66, 1.20)      | -2.52 (-5.09, 0.09)      | NA                       | NA                        | 1.13 (-3.28, 5.4)            | Ornish                | 3.53 (-1.74, 8.89)   | 3.65 (-0.53, 7.99)  | NA                  | 2.13 (-2.31, 6.67)   | NA                 | 1.06 (-1.98, 4.10)    | 2.13 (-0.45, 4.85)    |
|                                                                           | 4.86 (0.03, 9.70)        | 4.31 (-0.28, 8.93)                                                             | 1.61 (-2.41, 5.60)       | 0.35 (-3.79, 4.44)       | NA                       | NA                        | 4.02 (-1.44, 9.38)           | 2.87 (-1.84, 7.52)    | Paleolithic          | 0.13 (-5.69, 5.97)  | NA                  | -1.39 (-7.51, 4.68)  | NA                 | -2.47 (-7.90, 2.84)   | -1.40 (-6.46, 3.69)   |
|                                                                           | NA                       | NA                                                                             | NA                       | NA                       | NA                       | NA                        | NA                           | NA                    | NA                   | Portfolio           | NA                  | -1.52 (-6.73, 3.64)  | NA                 | -2.59 (-7.01, 1.65)   | -1.53 (-5.45, 2.41)   |
|                                                                           | 2.21 (-0.86, 5.34)       | 1.69 (-1.50, 4.94)                                                             | -1.02 (-4.10, 2.15)      | -2.27 (-5.31, 0.90)      | NA                       | NA                        | 1.39 (-2.59, 5.25)           | 0.22 (-3.61, 4.18)    | -2.61 (-7.65, 2.48)  | NA                  | Rosemary Conley     | NA                   | NA                 | NA                    | NA                    |
|                                                                           | 2.21 (-0.23, 4.63)       | 1.65 (-2.00, 5.39)                                                             | -1.04 (-4.64, 2.62)      | -2.31 (-5.9, 1.36)       | NA                       | NA                        | 1.37 (-2.10, 4.71)           | 0.21 (-4.04, 4.58)    | -2.66 (-8.04, 2.76)  | NA                  | -0.01 (-3.96, 3.88) | The Biggest Loser    | NA                 | -1.07 (-5.51, 3.25)   | -0.01 (-4.20, 4.26)   |

|                 |                          |                     |                     |                     |    |                    |                    |                     |                     |                    |                    |                    |                     |                 |                    |
|-----------------|--------------------------|---------------------|---------------------|---------------------|----|--------------------|--------------------|---------------------|---------------------|--------------------|--------------------|--------------------|---------------------|-----------------|--------------------|
|                 | 2.94 (-1.65, 7.45)       | 2.42 (-1.92, 6.72)  | -0.30 (-3.92, 3.32) | -1.55 (-5.32, 2.19) | NA | NA                 | 2.08 (-3.12, 7.19) | 0.97 (-3.44, 5.32)  | -1.90 (-7.31, 3.55) | NA                 | 0.73 (-4.11, 5.48) | 0.75 (-4.45, 5.85) | Volumetrics         | NA              | NA                 |
|                 | 2.41 (-0.22, 5.13)       | 1.87 (0.39, 3.53)   | -0.83 (-3.19, 1.66) | -2.08 (-4.47, 0.42) | NA | NA                 | 1.58 (-2.03, 5.16) | 0.42 (-2.79, 3.8)   | -2.43 (-7.07, 2.28) | NA                 | 0.2 (-2.90, 3.29)  | 0.22 (-3.35, 3.84) | -0.53 (-4.89, 3.93) | Weight Watchers | 1.07 (-1.64, 3.96) |
| 3 (-0.03, 6.05) | <b>2.47 (0.03, 4.96)</b> | -0.24 (-1.86, 1.47) | -1.49 (-3.32, 0.40) | NA                  | NA | 2.17 (-1.77, 5.99) | 1.02 (-1.38, 3.47) | -1.85 (-6.13, 2.52) | NA                  | 0.79 (-2.63, 4.18) | 0.81 (-3.06, 4.69) | 0.06 (-3.91, 4.09) | 0.61 (-2.09, 3.19)  | Zone            |                    |

The values correspond to the difference in median DBP reduction between the row and column at 6 months (e.g., the difference in median DBP reduction between the Atkins diet and usual diet at 6 months is 4.49 mm Hg).



Table S50: 6-month DBP reduction across all individual popular diets when restricted to studies without diet company support ( $\beta$ -coefficient = -0.36, 95%CrI: -2.85 to 2.23)

|                          |                          |                     |                             |                     |                     |                    |                     |                     |                     |                    |      |
|--------------------------|--------------------------|---------------------|-----------------------------|---------------------|---------------------|--------------------|---------------------|---------------------|---------------------|--------------------|------|
| Usual diet               |                          |                     |                             |                     |                     |                    |                     |                     |                     |                    |      |
| 1.14 (-0.97, 3.26)       | Dietary advice           |                     |                             |                     |                     |                    |                     |                     |                     |                    |      |
| <b>2.83 (1.06, 4.68)</b> | 1.69 (-0.37, 3.83)       | Low fat             |                             |                     |                     |                    |                     |                     |                     |                    |      |
| <b>3.95 (1.98, 6.01)</b> | <b>2.81 (0.61, 5.09)</b> | 1.11 (-0.02, 2.27)  | Atkins                      |                     |                     |                    |                     |                     |                     |                    |      |
| <b>2.67 (1.21, 4.19)</b> | 1.54 (-0.62, 3.72)       | -0.16 (-2.22, 1.86) | -1.27 (-3.52, 0.92)         | DASH                |                     |                    |                     |                     |                     |                    |      |
| 1.02 (-0.87, 2.92)       | -0.11 (-2.52, 2.27)      | -1.81 (-4.16, 0.47) | <b>-2.93 (-5.44, -0.49)</b> | -1.65 (-3.85, 0.51) | Mediterranean       |                    |                     |                     |                     |                    |      |
| 0.70 (-2.25, 3.61)       | -0.44 (-3.32, 2.40)      | -2.13 (-4.77, 0.38) | <b>-3.25 (-5.91, -0.71)</b> | -1.98 (-5.06, 1.04) | -0.33 (-3.59, 2.90) | Ornish             |                     |                     |                     |                    |      |
| 4.42 (-0.76, 9.67)       | 3.29 (-2.01, 8.64)       | 1.59 (-3.31, 6.48)  | 0.47 (-4.56, 5.48)          | 1.74 (-3.52, 7.06)  | 3.40 (-1.98, 8.85)  | 3.73 (-1.76, 9.29) | Paleolithic         |                     |                     |                    |      |
| <b>4.57 (0.49, 8.75)</b> | 3.44 (-0.79, 7.74)       | 1.74 (-1.98, 5.46)  | 0.63 (-3.28, 4.50)          | 1.90 (-2.33, 6.16)  | 3.55 (-0.79, 7.97)  | 3.87 (-0.59, 8.46) | 0.15 (-5.99, 6.28)  | Portfolio           |                     |                    |      |
| 1.69 (-2.01, 5.48)       | 0.55 (-3.35, 4.55)       | -1.14 (-4.91, 2.63) | -2.26 (-6.01, 1.50)         | -0.98 (-4.87, 2.97) | 0.67 (-3.37, 4.78)  | 1.00 (-3.3, 5.41)  | -2.72 (-8.91, 3.42) | -2.88 (-8.16, 2.40) | Rosemary Conley     |                    |      |
| 1.25 (-1.37, 3.97)       | 0.11 (-2.29, 2.6)        | -1.58 (-4.15, 0.99) | <b>-2.7 (-5.28, -0.11)</b>  | -1.43 (-4.19, 1.41) | 0.23 (-2.72, 3.27)  | 0.56 (-2.6, 3.81)  | -3.17 (-8.68, 2.36) | -3.33 (-7.83, 1.20) | -0.44 (-4.32, 3.44) | Weight Watchers    |      |
| <b>2.81 (0.39, 5.33)</b> | 1.67 (-0.75, 4.18)       | -0.02 (-1.91, 1.89) | -1.14 (-3.15, 0.88)         | 0.13 (-2.44, 2.78)  | 1.79 (-0.99, 4.66)  | 2.11 (-0.58, 4.94) | -1.61 (-6.83, 3.66) | -1.77 (-5.93, 2.42) | 1.12 (-2.96, 5.19)  | 1.56 (-1.32, 4.43) | Zone |

The values correspond to the difference in median DBP reduction between the row and column at 6 months (e.g., the difference in median DBP reduction between the Atkins diet and usual diet at 6 months is 3.37 mm Hg when restricting to studies without diet company support). NA means not available in this subgroup. Diets with underline indicate statistical significance change compared with the primary analysis between diets and usual diet.

Table S51: 6-month DBP reduction across all individual popular diets accounting for both of behavior support and exercise

|                          |                          |                          |                          |                          |                          |                          |                          |                          |                         |                 |  |  |  |  |
|--------------------------|--------------------------|--------------------------|--------------------------|--------------------------|--------------------------|--------------------------|--------------------------|--------------------------|-------------------------|-----------------|--|--|--|--|
| Usual diet               |                          |                          |                          |                          |                          |                          |                          |                          |                         |                 |  |  |  |  |
| -0.44 (-2.15, 1.40)      | Dietary advice           |                          |                          |                          |                          |                          |                          |                          |                         |                 |  |  |  |  |
| 1.71 (0.13, 3.36)        | 2.16 (0.22, 4.01)        | Low fat                  |                          |                          |                          |                          |                          |                          |                         |                 |  |  |  |  |
| 2.78 (1.09, 4.53)        | 3.22 (1.24, 5.14)        | 1.07 (0.23, 1.90)        | Atkins                   |                          |                          |                          |                          |                          |                         |                 |  |  |  |  |
| 3.11 (1.26, 5.21)        | 3.56 (1.29, 5.85)        | 1.40 (-0.29, 3.21)       | 0.33 (-1.51, 2.29)       | DASH                     |                          |                          |                          |                          |                         |                 |  |  |  |  |
| -30.01 (-169.90, 133.20) | -29.58 (-169.30, 133.70) | -31.75 (-171.50, 131.40) | -32.84 (-172.60, 130.40) | -33.18 (-172.80, 130.00) | Jenny Craig              |                          |                          |                          |                         |                 |  |  |  |  |
| 0.27 (-1.94, 2.46)       | 0.70 (-1.67, 3.00)       | -1.45 (-3.77, 0.81)      | -2.52 (-4.93, 0.16)      | -2.85 (-5.41, 0.44)      | 30.32 (-133.00, 170.20)  | Mediterranean            |                          |                          |                         |                 |  |  |  |  |
| -0.45 (-3.05, 2.09)      | -0.01 (-2.63, 2.45)      | -2.15 (-4.46, 0.00)      | -3.22 (-5.54, 1.04)      | -3.57 (-6.44, 0.90)      | 29.60 (-133.60, 169.50)  | -0.72 (-3.78, 2.27)      | Ornish                   |                          |                         |                 |  |  |  |  |
| 3.33 (-1.35, 8.01)       | 3.76 (-1.08, 8.50)       | 1.61 (-2.79, 5.99)       | 0.54 (-3.94, 5.01)       | 0.20 (-4.58, 4.88)       | 33.47 (-130.00, 173.30)  | 3.06 (-1.88, 8.01)       | 3.78 (-1.12, 8.76)       | Paleolithic              |                         |                 |  |  |  |  |
| -51.31 (-133.10, 112.40) | -50.84 (-132.70, 112.90) | -53.10 (-134.90, 110.80) | -54.18 (-136.00, 109.80) | -54.48 (-136.40, 109.20) | -10.85 (-204.60, 175.40) | -51.50 (-133.50, 112.00) | -50.80 (-132.80, 112.90) | -54.49 (-137.00, 109.00) | Portfolio               |                 |  |  |  |  |
| 13.94 (-195.70, 229.30)  | 14.38 (-195.30, 229.70)  | 12.31 (-197.50, 227.50)  | 11.20 (-198.60, 226.50)  | 10.85 (-198.90, 226.10)  | 53.39 (-283.10, 288.10)  | 13.63 (-196.20, 229.10)  | 14.40 (-195.00, 229.80)  | 10.64 (-198.80, 226.30)  | 56.31 (-185.30, 298.70) | Rosemary Conley |  |  |  |  |

|                          |                          |                          |                          |                          |                         |                          |                          |                          |                         |                          |                         |                     |                    |      |
|--------------------------|--------------------------|--------------------------|--------------------------|--------------------------|-------------------------|--------------------------|--------------------------|--------------------------|-------------------------|--------------------------|-------------------------|---------------------|--------------------|------|
| -17.58 (-142.50, 139.30) | -17.09 (-142.00, 140.00) | -19.25 (-144.00, 137.80) | -20.30 (-145.00, 136.70) | -20.65 (-145.40, 136.30) | 29.41 (-178.90, 182.90) | -17.79 (-142.70, 139.10) | -17.02 (-141.80, 140.00) | -20.64 (-145.50, 135.90) | 23.30 (-100.60, 222.30) | -26.63 (-250.50, 218.90) | The Biggest Loser       |                     |                    |      |
| 1.38 (-2.93, 5.77)       | 1.82 (-2.65, 6.28)       | -0.33 (-4.36, 3.73)      | -1.40 (-5.51, 2.75)      | -1.73 (-6.17, 2.62)      | 31.51 (-131.80, 171.00) | 1.13 (-3.54, 5.79)       | 1.84 (-2.73, 6.53)       | -1.94 (-7.89, 4.04)      | 52.66 (-110.90, 134.90) | -12.58 (-228.00, 196.90) | 18.79 (-138.30, 143.50) | Volumetrics         |                    |      |
| -0.91 (-3.47, 1.83)      | -0.45 (-2.66, 1.75)      | -2.62 (-5.14, 0.02)      | -3.68 (-6.22, 1.03)      | -4.02 (-6.93, 1.07)      | 29.11 (-134.40, 168.70) | -1.16 (-4.16, 1.94)      | -0.46 (-3.34, 2.68)      | -4.21 (-9.25, 0.93)      | 50.30 (-113.10, 132.30) | -14.76 (-230.30, 194.70) | 16.50 (-140.70, 141.60) | -2.27 (-7.07, 2.52) | Weight Watchers    |      |
| 1.65 (-0.43, 3.84)       | 2.08 (-0.08, 4.24)       | -0.06 (-1.65, 1.56)      | -1.13 (-2.78, 0.57)      | -1.47 (-3.79, 0.81)      | 31.70 (-131.50, 171.40) | 1.37 (-1.23, 4.12)       | 2.09 (-0.21, 4.58)       | -1.68 (-6.32, 3.05)      | 53.00 (-110.70, 134.90) | -12.32 (-227.50, 197.20) | 19.18 (-137.70, 144.00) | 0.27 (-4.10, 4.61)  | 2.55 (-0.21, 5.28) | Zone |

The values correspond to the difference in median DBP reduction between the row and column at 6 months (eg, the difference in median DBP reduction between the Atkins diet and Usual diet at 6 months is 2.78 mm Hg).

Table S52: 6-month LDL reduction across all individual popular diets when restricted to overweight/obese yet otherwise healthy populations (below left) and restricted to low risk of bias studies (above right)

|                                                                             |  | Low risk of bias studies ( $\beta$ -coefficient = 7.55, 95%CrI: -2.28 to 17.43) |                       |                       |                       |                        |                       |               |                       |                       |                       |                 |                       |             |    |    |                      |                        |
|-----------------------------------------------------------------------------|--|---------------------------------------------------------------------------------|-----------------------|-----------------------|-----------------------|------------------------|-----------------------|---------------|-----------------------|-----------------------|-----------------------|-----------------|-----------------------|-------------|----|----|----------------------|------------------------|
|                                                                             |  | 0Ctl_usual_diet                                                                 | 1Ctl_dietary_advice   | 2Ctl_low_fat_advice   | Atkins                | DASH                   | Jenny_Craig           | Mediterranean | Ornish                | Paleolithic           | Portfolio             | Rosemary_Conley | South_Beach           | NA          | NA | NA | NA                   | NA                     |
| Healthy populations ( $\beta$ -coefficient = -2.99, 95%CrI: -10.19 to 4.36) |  | -1.90 (-25.71, 21.61)                                                           | 10.00 (-13.21, 33.31) | 4.64 (-21.70, 28.84)  | 12.02 (-28.57, 51.39) | -1.02 (-33.82, 31.86)  | 12.04 (-19.09, 41.99) | NA            | 15.44 (-18.22, 49.09) | 29.45 (-2.94, 61.76)  | NA                    | NA              | NA                    | NA          | NA | NA | 4.21 (-23.40, 35.88) |                        |
|                                                                             |  | 0.94 (-9.84, 11.69)                                                             | 11.89 (-11.12, 34.93) | 6.55 (-19.61, 30.51)  | 13.97 (-26.53, 53.42) | 0.91 (-21.92, 23.88)   | 13.96 (-17.01, 43.84) | NA            | 17.33 (-16.08, 50.91) | 31.38 (-0.76, 63.61)  | NA                    | NA              | NA                    | NA          | NA | NA | NA                   | 6.11 (-21.33, 37.60)   |
|                                                                             |  | 8.23 (-2.88, 18.76)                                                             | 7.30 (-4.29, 18.2)    | -5.34 (-16.44, 3.56)  | 2.03 (-31.30, 34.18)  | -11.00 (-43.53, 21.35) | 2.11 (-18.43, 21.28)  | NA            | 5.44 (-18.85, 29.74)  | 19.46 (-3.23, 42.13)  | NA                    | NA              | NA                    | NA          | NA | NA | NA                   | -5.70 (-22.46, 14.32)  |
|                                                                             |  | 3.56 (-7.62, 14.26)                                                             | 2.66 (-9.1, 13.78)    | -4.66 (-8.75, 0.48)   | 7.47 (-24.77, 40.51)  | -5.69 (-38.46, 29.28)  | 7.32 (-11.96, 27.72)  | NA            | 10.84 (-14.43, 38.05) | 24.76 (1.16, 50.7)    | NA                    | NA              | NA                    | NA          | NA | NA | NA                   | -0.31 (-18.67, 23.25)  |
|                                                                             |  | NA                                                                              | NA                    | NA                    | NA                    | -13.11 (-58.41, 33.65) | -0.02 (-26.19, 26.29) | NA            | 3.45 (-36.64, 44.67)  | 17.36 (-21.74, 57.8)  | NA                    | NA              | NA                    | NA          | NA | NA | NA                   | -7.73 (-42.93, 31.93)  |
|                                                                             |  | 2.07 (-11.18, 15.21)                                                            | 1.13 (-8.00, 10.20)   | -6.17 (-19.71, 7.92)  | -1.52 (-15.21, 12.71) | NA                     | 13.06 (-25.57, 50.64) | NA            | 16.47 (-23.97, 57.18) | 30.47 (-9.16, 70.08)  | NA                    | NA              | NA                    | NA          | NA | NA | NA                   | 5.18 (-30.02, 44.60)   |
|                                                                             |  | 4.21 (-3.17, 11.81)                                                             | 3.29 (-9.76, 16.43)   | -4.00 (-16.77, 9.48)  | 0.65 (-12.28, 14.23)  | NA                     | 2.15 (-12.88, 17.44)  | NA            | 3.41 (-27.37, 35.08)  | 17.35 (-12.26, 47.98) | NA                    | NA              | NA                    | NA          | NA | NA | NA                   | -7.86 (-32.43, 21.47)  |
|                                                                             |  | 7.97 (-7.87, 23.2)                                                              | 7.07 (-9.14, 22.59)   | -0.25 (-11.62, 11.17) | 4.41 (-7.17, 15.99)   | NA                     | 5.92 (-12.14, 23.43)  | NA            | 3.77 (-13.92, 20.6)   | NA                    | NA                    | NA              | NA                    | NA          | NA | NA | NA                   | NA                     |
|                                                                             |  | 13.73 (-6.17, 32.88)                                                            | 12.81 (-7.33, 32.20)  | 5.5 (-10.85, 21.74)   | 10.15 (-6.76, 26.93)  | NA                     | 11.66 (-10.06, 32.68) | NA            | 9.51 (-11.90, 29.98)  | 5.76 (-14.26, 25.50)  | 14.00 (-19.28, 47.07) | NA              | NA                    | NA          | NA | NA | NA                   | -11.17 (-40.00, 21.09) |
|                                                                             |  | NA                                                                              | NA                    | NA                    | NA                    | NA                     | NA                    | NA            | NA                    | NA                    | Portfolio             | NA              | NA                    | NA          | NA | NA | NA                   | -25.29 (-52.50, 5.69)  |
|                                                                             |  | 10.57 (-4.21, 25.15)                                                            | 9.63 (-5.91, 25.03)   | 2.34 (-12.36, 17.41)  | 6.99 (-7.58, 21.87)   | NA                     | 8.52 (-8.77, 25.7)    | NA            | 6.34 (-10.27, 22.65)  | 2.58 (-15.74, 21.23)  | -3.17 (-25.03, 19.18) | NA              | Rosemary_Conley       | NA          | NA | NA | NA                   | NA                     |
|                                                                             |  | 5.78 (-15.14, 26.15)                                                            | 4.84 (-16.27, 25.45)  | -2.42 (-20.00, 15.04) | 2.24 (-15.88, 20.19)  | NA                     | 3.73 (-18.84, 25.85)  | NA            | 1.55 (-20.75, 23.21)  | -2.19 (-23.17, 18.71) | -7.95 (-31.89, 16)    | NA              | -4.78 (-28.03, 18.02) | South_Beach | NA | NA | NA                   | NA                     |

|  |                      |                      |                       |                      |    |                      |                       |                       |                       |    |                       |                       |                       |                       |                       |      |
|--|----------------------|----------------------|-----------------------|----------------------|----|----------------------|-----------------------|-----------------------|-----------------------|----|-----------------------|-----------------------|-----------------------|-----------------------|-----------------------|------|
|  | 3.92 (-8.71, 16.48)  | 2.98 (-13.60, 19.55) | -4.33 (-20.55, 12.64) | 0.34 (-16.04, 17.35) | NA | 1.86 (-16.33, 20.17) | -0.29 (-15.07, 14.21) | -4.07 (-23.83, 16.23) | -9.83 (-32.57, 13.81) | NA | -6.66 (-25.86, 12.80) | -1.91 (-25.67, 22.62) | The_Biggest_Loser     | NA                    | NA                    | NA   |
|  | 13.50 (-5.14, 31.68) | 12.59 (-6.39, 31.03) | 5.27 (-9.66, 20.33)   | 9.93 (-5.59, 25.49)  | NA | 11.44 (-9.18, 31.63) | 9.26 (-10.94, 28.82)  | 5.52 (-13.35, 24.35)  | -0.21 (-22.39, 22.02) | NA | 2.93 (-18.30, 23.87)  | 7.73 (-15.33, 30.88)  | 9.60 (-12.97, 31.60)  | Volumetrics           | NA                    |      |
|  | 4.48 (-7.12, 15.56)  | 3.56 (-6.04, 12.62)  | -3.76 (-15.56, 8.21)  | 0.90 (-11.01, 12.89) | NA | 2.41 (-9.67, 14.10)  | 0.26 (-13.65, 13.54)  | -3.50 (-19.76, 12.81) | -9.26 (-29.27, 11.06) | NA | -6.09 (-20.88, 8.45)  | -1.32 (-22.45, 20.00) | 0.58 (-16.69, 17.20)  | -9.02 (-28.18, 10.10) | Weight_Watchers       |      |
|  | 2.96 (-9.58, 14.86)  | 2.06 (-10.92, 14.27) | -5.26 (-11.19, 0.61)  | -0.61 (-7.41, 6.09)  | NA | 0.92 (-14.36, 15.54) | -1.24 (-16.00, 12.63) | -5.01 (-16.81, 6.70)  | -10.75 (-28.09, 6.61) | NA | -7.61 (-23.73, 8.11)  | -2.83 (-21.34, 15.71) | -0.94 (-18.87, 16.19) | -10.54 (-26.73, 5.49) | -1.50 (-14.75, 11.55) | Zone |

Table S53: 6-month LDL reduction across all individual popular diets when restricted to studies without diet company support ( $\beta$ -coefficient = -3.41, 95%CrI: -11.35 to 4.40)

|                            |                            |                            |                             |                            |                            |                            |                            |                       |                        |                      |                      |      |
|----------------------------|----------------------------|----------------------------|-----------------------------|----------------------------|----------------------------|----------------------------|----------------------------|-----------------------|------------------------|----------------------|----------------------|------|
| 0Ctl_usual_diet            |                            |                            |                             |                            |                            |                            |                            |                       |                        |                      |                      |      |
| -0.95 (-8.19, 6.46)        | 1Ctl_dietary_advice        |                            |                             |                            |                            |                            |                            |                       |                        |                      |                      |      |
| 3.36 (-3.53, 10.04)        | 4.31 (-3.44, 11.72)        | 2Ctl_low_fat_advice        |                             |                            |                            |                            |                            |                       |                        |                      |                      |      |
| -0.71 (-8.06, 6.48)        | 0.23 (-7.93, 8.13)         | -4.07 (-7.53, -0.57)       | Atkins                      |                            |                            |                            |                            |                       |                        |                      |                      |      |
| 3.34 (-4.13, 11.01)        | 4.27 (-5.83, 14.6)         | -0.02 (-9.74, 10.09)       | 4.06 (-6.03, 14.50)         | DASH                       |                            |                            |                            |                       |                        |                      |                      |      |
| 0.04 (-16.16, 16.12)       | 0.99 (-15.02, 16.70)       | -3.32 (-19.59, 12.89)      | 0.75 (-15.73, 17.14)        | -3.33 (-21.17, 14.27)      | Jenny_Craig                |                            |                            |                       |                        |                      |                      |      |
| 6.16 (1.27, 11.48)         | <b>7.08 (0.58, 13.99)</b>  | 2.81 (-3.69, 9.87)         | 6.87 (-0.17, 14.43)         | 2.84 (-5.71, 11.46)        | 6.14 (-9.92, 22.56)        | Mediterranean              |                            |                       |                        |                      |                      |      |
| 6.57 (-3.06, 16.47)        | 7.52 (-2.06, 17.27)        | 3.21 (-4.66, 11.53)        | 7.28 (-0.73, 15.71)         | 3.24 (-8.93, 15.37)        | 6.55 (-10.72, 24.12)       | 0.40 (-9.34, 10.01)        | Ornish                     |                       |                        |                      |                      |      |
| 8.72 (-8.13, 25.52)        | 9.68 (-7.53, 26.73)        | 5.38 (-9.99, 20.84)        | 9.45 (-6.35, 25.25)         | 5.38 (-13.04, 23.59)       | 8.70 (-13.63, 31.09)       | 2.55 (-14.41, 19.17)       | 2.15 (-15.31, 19.42)       | Paleolithic           |                        |                      |                      |      |
| <b>22.81 (9.06, 36.27)</b> | <b>23.75 (9.55, 37.61)</b> | <b>19.45 (7.65, 31.25)</b> | <b>23.51 (11.17, 35.81)</b> | <b>19.47 (3.84, 34.61)</b> | <b>22.74 (2.74, 42.87)</b> | <b>16.66 (2.69, 29.87)</b> | <b>16.23 (1.70, 30.25)</b> | 14.05 (-5.32, 33.36)  | Portfolio              |                      |                      |      |
| 8.04 (-5.30, 21.39)        | 9.00 (-5.24, 23.12)        | 4.70 (-8.45, 17.97)        | 8.77 (-4.31, 21.89)         | 4.70 (-10.63, 19.86)       | 8 (-11.62, 27.78)          | 1.88 (-12.02, 15.42)       | 1.48 (-13.59, 16.22)       | -0.7 (-20.95, 19.69)  | -14.74 (-32.34, 3.00)  | Rosemary_Conley      |                      |      |
| 1.61 (-8.27, 11.23)        | 2.55 (-7.85, 12.61)        | -1.74 (-10.99, 7.39)       | 2.32 (-6.93, 11.39)         | -1.74 (-14.14, 10.24)      | 1.56 (-14.49, 17.54)       | -4.58 (-14.89, 5.18)       | -4.99 (-16.29, 5.9)        | -7.12 (-25.12, 10.65) | -21.19 (-36.23, -6.35) | -6.43 (-20.06, 6.90) | Weight_Watchers      |      |
| -0.72 (-9.02, 7.48)        | 0.25 (-8.68, 8.89)         | -4.06 (-9.09, 1.03)        | 0.01 (-5.63, 5.66)          | -4.04 (-15.18, 6.79)       | -0.75 (-17.49, 16.09)      | -6.87 (-15.34, 1.10)       | -7.28 (-16.02, 1.05)       | -9.45 (-25.70, 6.72)  | -23.5 (-36.31, -10.67) | -8.76 (-22.65, 5.04) | -2.30 (-12.17, 7.68) | Zone |

Table S54: Network meta-regression adjusting for behavior support and exercise for 6-month LDL reduction

|                          |                          |                          |                           |                          |                          |                          |                          |                          |                          |                 |  |  |  |  |  |
|--------------------------|--------------------------|--------------------------|---------------------------|--------------------------|--------------------------|--------------------------|--------------------------|--------------------------|--------------------------|-----------------|--|--|--|--|--|
| Usual diet               |                          |                          |                           |                          |                          |                          |                          |                          |                          |                 |  |  |  |  |  |
| 1.38 (-5.14, 7.92)       | Dietary advice           |                          |                           |                          |                          |                          |                          |                          |                          |                 |  |  |  |  |  |
| 4.02 (-2.84, 10.80)      | 2.64 (-4.03, 9.34)       | Low fat                  |                           |                          |                          |                          |                          |                          |                          |                 |  |  |  |  |  |
| -0.46 (-7.42, 6.41)      | -1.84 (-8.64, 4.94)      | -4.48 (-7.02, -1.98)     | Atkins                    |                          |                          |                          |                          |                          |                          |                 |  |  |  |  |  |
| 10.39 (-3.85, 24.69)     | 8.99 (-4.96, 23.20)      | 6.38 (-6.78, 19.68)      | 10.84 (-2.44, 24.32)      | DASH                     |                          |                          |                          |                          |                          |                 |  |  |  |  |  |
| 2.18 (-10.06, 14.55)     | 0.80 (-9.58, 11.29)      | -1.82 (-14.26, 10.66)    | 2.64 (-9.83, 15.18)       | -8.20 (-25.74, 9.15)     | Jenny Craig              |                          |                          |                          |                          |                 |  |  |  |  |  |
| 9.19 (2.97, 15.56)       | 7.80 (2.03, 13.77)       | 5.17 (0.22, 10.29)       | <b>9.65 (4.50, 14.98)</b> | -1.19 (-14.42, 11.97)    | 6.99 (-4.93, 19.07)      | Mediterranean            |                          |                          |                          |                 |  |  |  |  |  |
| 6.91 (-2.36, 16.25)      | 5.52 (-3.24, 14.36)      | 2.89 (-4.29, 10.11)      | <b>7.37 (0.15, 14.67)</b> | -3.48 (-18.41, 11.35)    | 4.71 (-8.96, 18.40)      | -2.28 (-10.60, 5.97)     | Ornish                   |                          |                          |                 |  |  |  |  |  |
| 9.40 (-6.29, 24.92)      | 8.01 (-7.56, 23.55)      | 5.39 (-8.75, 19.33)      | 9.86 (-4.44, 24.06)       | -1.00 (-20.48, 18.16)    | 7.19 (-11.65, 26.02)     | 0.21 (-14.86, 15.02)     | 2.48 (-13.34, 18.13)     | Paleolithic              |                          |                 |  |  |  |  |  |
| 23.10 (-109.20, 135.20)  | 21.73 (-110.70, 134.10)  | 19.10 (-113.10, 131.80)  | 23.62 (-108.70, 136.30)   | 12.21 (-120.20, 126.70)  | 20.80 (-111.80, 133.50)  | 13.87 (-118.30, 126.60)  | 16.18 (-116.10, 129.00)  | 13.61 (-119.70, 127.40)  | Portfolio                |                 |  |  |  |  |  |
| -11.77 (-174.80, 130.80) | -13.25 (-176.10, 129.30) | -15.89 (-178.50, 126.20) | -11.42 (-174.00, 130.70)  | -22.22 (-185.50, 119.40) | -14.30 (-177.40, 129.10) | -21.16 (-183.70, 121.00) | -18.88 (-181.50, 123.20) | -21.36 (-184.50, 121.30) | -28.62 (-228.00, 143.50) | Rosemary Conley |  |  |  |  |  |

|                         |                         |                         |                         |                         |                         |                               |                              |                         |                          |                         |                         |                          |                       |                       |      |
|-------------------------|-------------------------|-------------------------|-------------------------|-------------------------|-------------------------|-------------------------------|------------------------------|-------------------------|--------------------------|-------------------------|-------------------------|--------------------------|-----------------------|-----------------------|------|
| 1.44 (-15.44, 18.31)    | 0.07 (-16.78, 16.94)    | -2.57 (-18.06, 12.94)   | 1.90 (-13.77, 17.60)    | -8.92 (-29.36, 11.30)   | -0.75 (-20.59, 19.08)   | -7.75 (-24.02, 8.42)          | -5.48 (-22.50, 11.64)        | -7.93 (-28.87, 13.02)   | -21.39 (-134.90, 112.00) | 13.45 (-129.80, 176.70) | South Beach             |                          |                       |                       |      |
| 27.79 (-103.90, 168.00) | 26.33 (-105.30, 166.40) | 23.79 (-108.00, 163.60) | 28.27 (-103.50, 168.10) | 17.50 (-115.30, 157.70) | 25.46 (-106.60, 165.70) | 18.56 (-113.10, 158.50)       | 20.87 (-110.90, 160.90)      | 18.40 (-114.00, 158.60) | 14.87 (-173.60, 186.30)  | 41.46 (-155.30, 262.30) | 26.16 (-106.10, 166.30) | The Biggest Loser        |                       |                       |      |
| 9.31 (-4.83, 23.43)     | 7.92 (-6.15, 22.05)     | 5.29 (-7.20, 17.74)     | 9.77 (-2.98, 22.45)     | -1.10 (-19.23, 16.91)   | 7.12 (-10.47, 24.66)    | 0.12 (-13.39, 13.47)          | 2.41 (-12.01, 16.76)         | -0.08 (-18.83, 18.78)   | -13.53 (-127.00, 119.40) | 21.31 (-121.70, 183.70) | 7.84 (-12.00, 27.90)    | -18.57 (-158.40, 113.80) | Volumetrics           |                       |      |
| 0.45 (-14.37, 15.21)    | -0.95 (-15.69, 13.60)   | -3.56 (-17.05, 9.67)    | 0.92 (-12.55, 14.15)    | -9.92 (-28.74, 8.59)    | -1.78 (-19.87, 16.28)   | -8.75 (-22.96, 5.17)          | -6.46 (-20.58, 7.47)         | -8.98 (-28.36, 10.35)   | -22.43 (-136.00, 110.70) | 12.60 (-130.00, 174.90) | -0.99 (-21.52, 19.33)   | -26.91 (-167.60, 104.80) | -8.87 (-27.12, 9.25)  | Weight Watchers       |      |
| -0.82 (-8.80, 7.07)     | -2.21 (-10.00, 5.57)    | -4.85 (-9.22, 0.49)     | -0.37 (-5.10, 4.37)     | -11.22 (-25.17, 2.65)   | -3.02 (-16.17, 10.00)   | <b>-10.01 (-16.61, -3.58)</b> | <b>-7.74 (-15.33, -0.19)</b> | -10.24 (-24.83, 4.53)   | -23.98 (-136.60, 108.30) | 11.06 (-131.10, 173.60) | -2.27 (-18.42, 13.77)   | -28.60 (-168.60, 103.20) | -10.15 (-23.31, 3.01) | -1.29 (-14.61, 12.35) | Zone |

The values correspond to the difference in median LDL reduction between the row and column at 6 months (eg, the difference in median LDL reduction between the Atkins diet and Usual diet at 6 months is -0.46 mg/dL).



Table S55: 6-month HDL increase across all individual popular diets when restricted to overweight/obese yet otherwise healthy populations (below left) and restricted to low risk of bias studies (above right)

|                                                                           |  | Low risk of bias studies ( $\beta$ -coefficient = -1.76, 95%CrI: -5.07 to 1.57) |                     |                          |                          |                     |                     |                             |                             |                      |                     |                    |                     |                     |    |                     |                     |    |
|---------------------------------------------------------------------------|--|---------------------------------------------------------------------------------|---------------------|--------------------------|--------------------------|---------------------|---------------------|-----------------------------|-----------------------------|----------------------|---------------------|--------------------|---------------------|---------------------|----|---------------------|---------------------|----|
|                                                                           |  | Usual diet                                                                      | -0.95 (-3.85, 2.10) | -1.10 (-3.63, 1.41)      | 2.17 (-0.49, 4.85)       | -1.66 (-4.22, 0.93) | -2.01 (-5.54, 1.63) | -0.34 (-2.13, 1.34)         | <b>-4.00 (-7.64, -0.41)</b> | -1.50 (-8.18, 5.17)  | -2.22 (-7.64, 3.15) | NA                 | 1.40 (-5.17, 8.01)  | -0.02 (-4.11, 4.08) | NA | 0.56 (-2.93, 4.09)  | 1.00 (-2.22, 4.18)  |    |
| Healthy populations ( $\beta$ -coefficient = 0.27, 95%CrI: -2.46 to 2.94) |  | -0.92 (-4.05, 2.26)                                                             | Dietary advice      | -0.15 (-3.01, 2.56)      | <b>3.12 (0.18, 5.94)</b> | -0.71 (-4.39, 2.89) | -1.06 (-3.97, 1.85) | 0.62 (-2.25, 3.17)          | -3.05 (-6.41, 0.12)         | -0.55 (-7.41, 6.19)  | -1.27 (-6.89, 4.16) | NA                 | 2.35 (-4.36, 9.00)  | 0.94 (-4.20, 5.93)  | NA | 1.51 (-1.07, 3.98)  | 1.95 (-1.45, 5.17)  |    |
|                                                                           |  | -2.80 (-5.96, 0.64)                                                             | -1.89 (-5.10, 1.58) | Low fat                  | <b>3.27 (2.02, 4.57)</b> | -0.56 (-3.67, 2.61) | -0.91 (-4.11, 2.42) | 0.76 (-1.48, 2.90)          | -2.90 (-5.93, 0.09)         | -0.40 (-6.60, 5.80)  | -1.13 (-5.90, 3.63) | NA                 | 2.50 (-3.55, 8.61)  | 1.08 (-3.71, 5.92)  | NA | 1.66 (-1.56, 4.96)  | 2.10 (-0.03, 4.23)  |    |
|                                                                           |  | 0.91 (-2.35, 4.46)                                                              | 1.82 (-1.51, 5.42)  | <b>3.71 (2.34, 5.11)</b> | Atkins                   | -3.84 (-7.10, 0.54) | -4.18 (-7.52, 0.75) | <b>-2.51 (-4.93, -0.23)</b> | <b>-6.17 (-9.26, -3.16)</b> | -3.68 (-10.01, 2.64) | -4.40 (-9.37, 0.51) | NA                 | -0.78 (-6.97, 5.45) | -2.19 (-7.08, 2.69) | NA | -1.61 (-4.91, 1.73) | -1.17 (-3.50, 1.12) |    |
|                                                                           |  | NA                                                                              | NA                  | NA                       | NA                       | DASH                | -0.34 (-4.45, 3.81) | 1.32 (-1.52, 4.03)          | -2.34 (-6.52, 1.73)         | 0.16 (-6.80, 7.04)   | -0.57 (-6.29, 5.12) | NA                 | 3.07 (-3.77, 9.91)  | 1.65 (-3.22, 6.44)  | NA | 2.23 (-1.86, 6.30)  | 2.66 (-1.09, 6.34)  |    |
|                                                                           |  | -3.58 (-7.57, 0.75)                                                             | -2.65 (-5.64, 0.64) | -0.78 (-5.06, 3.68)      | -4.49 (-8.86, 0.05)      | NA                  | Jenny Craig         | 1.67 (-1.86, 4.97)          | -2.00 (-6.01, 1.88)         | 0.50 (-6.53, 7.48)   | -0.22 (-6.06, 5.49) | NA                 | 3.40 (-3.49, 10.27) | 2.00 (-3.51, 7.36)  | NA | 2.57 (-1.03, 6.09)  | 3.01 (-0.84, 6.72)  |    |
|                                                                           |  | -0.76 (-3.38, 1.69)                                                             | 0.17 (-4.01, 4.11)  | 2.05 (-2.39, 6.01)       | -1.66 (-6.17, 2.38)      | NA                  | 2.82 (-2.34, 7.44)  | Mediterranean               | <b>-3.66 (-7.01, -0.24)</b> | -1.16 (-7.69, 5.45)  | -1.89 (-7.09, 3.41) | NA                 | 1.75 (-4.66, 8.29)  | 0.32 (-4.05, 4.84)  | NA | 0.90 (-2.31, 4.29)  | 1.34 (-1.57, 4.32)  |    |
|                                                                           |  | -4.31 (-9.23, 0.87)                                                             | -3.39 (-8.35, 1.78) | -1.51 (-5.39, 2.37)      | -5.22 (-9.18, 1.29)      | NA                  | -0.73 (-6.64, 4.99) | -3.55 (-9.00, 2.33)         | Ornish                      | 2.50 (-4.35, 9.41)   | 1.77 (-3.84, 7.42)  | NA                 | 5.40 (-1.32, 12.22) | 3.98 (-1.45, 9.49)  | NA | 4.56 (0.92, 8.3)    | 5.00 (1.72, 8.31)   |    |
|                                                                           |  | -3.18 (-9.89, 3.68)                                                             | -2.26 (-8.97, 4.57) | -0.39 (-6.32, 5.54)      | -4.10 (-10.21, 1.98)     | NA                  | 0.38 (-7.03, 7.67)  | -2.4 (-9.53, 4.98)          | 1.11 (-5.97, 8.20)          | Paleolithic          | -0.72 (-8.54, 7.08) | NA                 | 2.90 (-5.76, 11.59) | 1.48 (-6.31, 9.32)  | NA | 2.06 (-4.94, 9.07)  | 2.50 (-4.05, 9.03)  |    |
|                                                                           |  | NA                                                                              | NA                  | NA                       | NA                       | NA                  | NA                  | NA                          | NA                          | NA                   | Portfolio           | NA                 | 3.62 (-4.07, 11.39) | 2.21 (-4.54, 8.99)  | NA | 2.78 (-2.94, 8.60)  | 3.23 (-2.00, 8.45)  |    |
|                                                                           |  | -2.24 (-7.17, 2.76)                                                             | -1.31 (-6.55, 3.95) | 0.57 (-4.74, 5.73)       | -3.14 (-8.45, 2.02)      | NA                  | 1.34 (-4.70, 7.09)  | -1.47 (-6.94, 4.20)         | 2.08 (-4.44, 8.44)          | 0.95 (-7.01, 8.78)   | NA                  | Rosemary_Conley    | NA                  | NA                  | NA | NA                  | NA                  | NA |
|                                                                           |  | -0.29 (-6.93, 6.52)                                                             | 0.63 (-6.02, 7.40)  | 2.50 (-3.35, 8.32)       | -1.20 (-7.23, 4.78)      | NA                  | 3.29 (-4.11, 10.48) | 0.46 (-6.57, 7.86)          | 3.99 (-2.97, 10.98)         | 2.9 (-5.45, 11.22)   | NA                  | 1.94 (-5.83, 9.83) | South_Beach         | -1.41 (-9.17, 6.32) | NA | -0.84 (-7.74, 6.04) | -0.40 (-6.86, 6.00) |    |

|  |                     |                     |                    |                     |    |                    |                     |                     |                     |    |                    |                     |                     |                     |                    |                    |
|--|---------------------|---------------------|--------------------|---------------------|----|--------------------|---------------------|---------------------|---------------------|----|--------------------|---------------------|---------------------|---------------------|--------------------|--------------------|
|  | -0.01 (-3.77, 3.76) | 0.92 (-4.02, 5.78)  | 2.81 (-2.34, 7.62) | -0.90 (-6.15, 3.97) | NA | 3.59 (-2.26, 8.92) | 0.73 (-3.66, 5.39)  | 4.31 (-2.11, 10.41) | 3.18 (-4.67, 10.81) | NA | 2.24 (-3.99, 8.38) | 0.29 (-7.47, 7.81)  | The Biggest Loser   | NA                  | 0.58 (-4.80, 5.99) | 1.02 (-4.21, 6.20) |
|  | -0.80 (-6.31, 4.98) | 0.13 (-5.42, 5.89)  | 2.01 (-2.58, 6.57) | -1.70 (-6.51, 3.06) | NA | 2.78 (-3.63, 9.04) | -0.04 (-6.01, 6.38) | 3.51 (-2.45, 9.49)  | 2.38 (-5.06, 9.85)  | NA | 1.44 (-5.42, 8.47) | -0.51 (-7.92, 6.88) | -0.8 (-7.40, 6.13)  | Volumetrics         | NA                 | NA                 |
|  | -0.96 (-4.28, 2.58) | -0.03 (-3.05, 3.13) | 1.85 (-1.91, 5.58) | -1.86 (-5.69, 1.92) | NA | 2.63 (-1.55, 6.62) | -0.2 (-4.30, 4.28)  | 3.36 (-2.02, 8.70)  | 2.24 (-4.81, 9.23)  | NA | 1.29 (-3.68, 6.33) | -0.66 (-7.58, 6.29) | -0.97 (-5.90, 4.25) | -0.15 (-6.12, 5.74) | Weight Watchers    | 0.44 (-3.27, 4.06) |
|  | -0.52 (-4.22, 3.43) | 0.41 (-3.38, 4.36)  | 2.29 (0.23, 4.30)  | -1.42 (-3.77, 0.85) | NA | 3.07 (-1.85, 7.73) | 0.24 (-4.18, 5.07)  | 3.79 (-0.22, 7.77)  | 2.67 (-3.61, 8.93)  | NA | 1.72 (-3.79, 7.36) | -0.22 (-6.41, 5.95) | -0.52 (-5.73, 4.98) | 0.28 (-4.73, 5.26)  | 0.44 (-3.79, 4.66) | Zone               |

Table S56: 6-month HDL increase across all individual popular diets when restricted to studies without diet company support ( $\beta$  -coefficient = 0.37, 95%CrI: -2.70 to 3.42)

|                             |                             |                             |                             |                     |                     |                      |                          |                     |                    |                    |                     |      |  |
|-----------------------------|-----------------------------|-----------------------------|-----------------------------|---------------------|---------------------|----------------------|--------------------------|---------------------|--------------------|--------------------|---------------------|------|--|
| 0Ctl_usual_diet             |                             |                             |                             |                     |                     |                      |                          |                     |                    |                    |                     |      |  |
| <b>-2.31 (-4.42, -0.06)</b> | 1Ctl_dietary_advice         |                             |                             |                     |                     |                      |                          |                     |                    |                    |                     |      |  |
| -2.47 (-4.7, -0.06)         | -0.18 (-2.39, 2.19)         | 2Ctl_low_fat_advice         |                             |                     |                     |                      |                          |                     |                    |                    |                     |      |  |
| 0.94 (-1.44, 3.50)          | <b>3.24 (0.86, 5.74)</b>    | <b>3.41 (2.18, 4.63)</b>    | Atkins                      |                     |                     |                      |                          |                     |                    |                    |                     |      |  |
| -1.48 (-4.03, 1.16)         | 0.83 (-2.42, 4.08)          | 1.00 (-2.41, 4.3)           | -2.41 (-5.93, 1.00)         | DASH                |                     |                      |                          |                     |                    |                    |                     |      |  |
| -2.74 (-8.49, 2.99)         | -0.44 (-6.18, 5.22)         | -0.28 (-6.28, 5.60)         | -3.7 (-9.74, 2.25)          | -1.27 (-7.6, 5.00)  | Jenny_Craig         |                      |                          |                     |                    |                    |                     |      |  |
| -0.82 (-2.64, 0.85)         | 1.50 (-0.78, 3.42)          | 1.65 (-0.97, 3.93)          | -1.77 (-4.53, 0.68)         | 0.64 (-2.35, 3.45)  | 1.91 (-3.93, 7.71)  | Mediterranean        |                          |                     |                    |                    |                     |      |  |
| <b>-5.28 (-8.44, -2.1)</b>  | <b>-2.99 (-5.90, -0.13)</b> | <b>-2.81 (-5.60, -0.19)</b> | <b>-6.22 (-9.07, -3.53)</b> | -3.81 (-7.83, 0.17) | -2.54 (-8.74, 3.71) | -4.46 (-7.56, -1.15) | Ornish                   |                     |                    |                    |                     |      |  |
| -2.87 (-9.03, 3.50)         | -0.58 (-6.75, 5.74)         | -0.40 (-6.19, 5.43)         | -3.82 (-9.73, 2.15)         | -1.40 (-8.07, 5.38) | -0.12 (-8.37, 8.31) | -2.05 (-8.2, 4.45)   | 2.41 (-3.9, 8.94)        | Paleolithic         |                    |                    |                     |      |  |
| -3.58 (-8.32, 1.40)         | -1.27 (-6.04, 3.66)         | -1.09 (-5.37, 3.19)         | -4.51 (-8.95, -0.03)        | -2.10 (-7.46, 3.4)  | -0.83 (-8.01, 6.6)  | -2.76 (-7.47, 2.37)  | 1.71 (-3.27, 6.85)       | -0.69 (-7.95, 6.50) | Portfolio          |                    |                     |      |  |
| -2.01 (-6.76, 2.69)         | 0.28 (-4.61, 5.08)          | 0.44 (-4.49, 5.23)          | -2.97 (-7.91, 1.82)         | -0.53 (-5.94, 4.73) | 0.73 (-6.47, 7.91)  | -1.19 (-6.01, 3.72)  | 3.26 (-2.04, 8.54)       | 0.84 (-6.84, 8.37)  | 1.55 (-5.00, 7.90) | Rosemary_Conley    |                     |      |  |
| -0.48 (-3.17, 2.13)         | 1.84 (-0.67, 4.08)          | 1.99 (-0.87, 4.56)          | -1.42 (-4.32, 1.21)         | 0.99 (-2.71, 4.51)  | 2.25 (-3.52, 8.02)  | 0.33 (-2.35, 3.14)   | <b>4.81 (1.47, 8.00)</b> | 2.39 (-4.17, 8.68)  | 3.09 (-2.13, 7.99) | 1.53 (-3.21, 6.25) | Weight_Watchers     |      |  |
| -0.60 (-3.36, 2.30)         | 1.70 (-1.02, 4.52)          | <b>1.87 (0.05, 3.67)</b>    | -1.54 (-3.58, 0.49)         | 0.88 (-2.82, 4.64)  | 2.15 (-3.92, 8.33)  | 0.23 (-2.56, 3.31)   | <b>4.69 (1.80, 7.69)</b> | 2.27 (-3.86, 8.31)  | 2.97 (-1.70, 7.58) | 1.43 (-3.62, 6.60) | -0.12 (-3.08, 3.09) | Zone |  |

Table S57: 6-month HDL increase across all individual popular diets accounting for both of behavior support and exercise

|                             |                          |                             |                              |                         |                           |                             |                         |                         |                         |                 |  |  |  |  |  |
|-----------------------------|--------------------------|-----------------------------|------------------------------|-------------------------|---------------------------|-----------------------------|-------------------------|-------------------------|-------------------------|-----------------|--|--|--|--|--|
| Usual diet                  |                          |                             |                              |                         |                           |                             |                         |                         |                         |                 |  |  |  |  |  |
| -1.24 (-3.44, 0.96)         | Dietary advice           |                             |                              |                         |                           |                             |                         |                         |                         |                 |  |  |  |  |  |
| -0.34 (-2.94, 1.97)         | 0.91 (-1.49, 2.96)       | Low fat                     |                              |                         |                           |                             |                         |                         |                         |                 |  |  |  |  |  |
| <b>3.41 (0.83, 5.75)</b>    | <b>4.65 (2.27, 6.76)</b> | <b>3.74 (2.86, 4.71)</b>    | Atkins                       |                         |                           |                             |                         |                         |                         |                 |  |  |  |  |  |
| -0.98 (-5.34, 3.17)         | 0.26 (-3.99, 4.28)       | -0.62 (-4.45, 3.16)         | <b>-4.36 (-8.29, -0.55)</b>  | DASH                    |                           |                             |                         |                         |                         |                 |  |  |  |  |  |
| <b>-5.22 (-9.71, -0.62)</b> | -3.97 (-7.94, 0.02)      | <b>-4.87 (-9.24, -0.13)</b> | <b>-8.61 (-13.04, -3.91)</b> | -4.24 (-9.79, 1.60)     | Jenny Craig               |                             |                         |                         |                         |                 |  |  |  |  |  |
| 0.53 (-1.85, 2.66)          | 1.78 (-0.41, 3.61)       | 0.85 (-0.95, 2.70)          | <b>-2.87 (-4.80, -1.02)</b>  | 1.49 (-2.25, 5.27)      | <b>5.74 (1.11, 10.03)</b> | Mediterranean               |                         |                         |                         |                 |  |  |  |  |  |
| <b>-3.48 (-6.80, -0.40)</b> | -2.24 (-5.15, 0.44)      | <b>-3.13 (-5.73, -0.52)</b> | <b>-6.87 (-9.52, -4.27)</b>  | -2.50 (-7.00, 2.03)     | 1.73 (-3.28, 6.46)        | <b>-4.00 (-6.87, -1.13)</b> | Ornish                  |                         |                         |                 |  |  |  |  |  |
| -0.81 (-7.06, 5.36)         | 0.43 (-5.73, 6.51)       | -0.44 (-6.14, 5.30)         | -4.19 (-9.96, 1.61)          | 0.18 (-6.60, 7.07)      | 4.43 (-3.01, 11.62)       | -1.31 (-7.27, 4.71)         | 2.68 (-3.57, 8.97)      | Paleolithic             |                         |                 |  |  |  |  |  |
| 7.47 (-95.92, 145.80)       | 8.69 (-94.51, 147.30)    | 7.85 (-95.26, 146.40)       | 4.11 (-99.13, 142.60)        | 8.57 (-94.75, 147.30)   | 12.64 (-90.47, 151.30)    | 6.98 (-96.26, 145.50)       | 10.95 (-92.09, 149.50)  | 8.28 (-95.28, 146.60)   | Portfolio               |                 |  |  |  |  |  |
| 27.04 (-151.00, 222.50)     | 28.35 (-149.50, 223.80)  | 27.50 (-150.20, 222.60)     | 23.76 (-153.90, 218.90)      | 28.07 (-149.40, 222.70) | 32.64 (-145.60, 228.30)   | 26.65 (-151.20, 221.90)     | 30.67 (-147.10, 225.80) | 27.96 (-149.40, 223.20) | 14.04 (-221.70, 220.70) | Rosemary Conley |  |  |  |  |  |

|                         |                         |                          |                         |                         |                           |                         |                           |                         |                         |                           |                         |                        |                     |                    |      |
|-------------------------|-------------------------|--------------------------|-------------------------|-------------------------|---------------------------|-------------------------|---------------------------|-------------------------|-------------------------|---------------------------|-------------------------|------------------------|---------------------|--------------------|------|
| 2.13 (-3.99, 8.16)      | 3.37 (-2.70, 9.28)      | 2.51 (-3.05, 8.05)       | -1.24 (-6.88, 4.36)     | 3.13 (-3.56, 9.86)      | 7.35 (0.06, 14.43)        | 1.64 (-4.20, 7.46)      | 5.63 (-0.50, 11.73)       | 2.94 (-5.03, 10.89)     | -5.31 (-143.80, 97.97)  | -25.06 (-220.60, 152.20)  | South Beach             |                        |                     |                    |      |
| -65.18 (-276.90, 23.33) | -63.82 (-276.30, 24.62) | -64.66 (-277.60, 23.75)  | -68.42 (-281.30, 19.98) | -63.95 (-276.70, 24.28) | -59.68 (-271.80, 28.94)   | -65.54 (-278.20, 22.86) | -61.50 (-274.20, 26.87)   | -64.16 (-276.50, 24.47) | -98.37 (-362.00, 77.44) | -128.30 (-326.10, 125.80) | -67.03 (-279.70, 21.61) | The Biggest Loser      |                     |                    |      |
| 1.64 (-3.37, 6.41)      | 2.89 (-2.02, 7.54)      | 2.00 (-2.23, 6.22)       | -1.75 (-6.10, 2.55)     | 2.63 (-3.04, 8.30)      | <b>6.87 (0.45, 12.91)</b> | 1.13 (-3.49, 5.72)      | <b>5.12 (0.16, 10.08)</b> | 2.43 (-4.66, 9.53)      | -5.84 (-144.50, 97.50)  | -25.58 (-220.60, 152.20)  | -0.51 (-7.49, 6.47)     | 66.52 (-21.77, 279.60) | Volumetrics         |                    |      |
| 1.07 (-2.32, 4.26)      | 2.32 (-0.43, 4.85)      | 1.38 (-1.58, 4.58)       | -2.35 (-5.37, 0.79)     | 2.03 (-2.61, 6.81)      | <b>6.28 (1.37, 10.98)</b> | 0.52 (-2.47, 3.71)      | <b>4.53 (1.14, 8.05)</b>  | 1.85 (-4.62, 8.33)      | -6.44 (-144.90, 96.92)  | -26.07 (-221.40, 151.70)  | -1.10 (-7.36, 5.30)     | 66.10 (-22.43, 278.60) | -0.59 (-5.76, 4.69) | Weight Watchers    |      |
| 1.41 (-1.58, 4.14)      | 2.65 (-0.09, 5.13)      | <b>1.76 (0.15, 3.37)</b> | -1.98 (-3.78, 0.24)     | 2.39 (-1.69, 6.51)      | <b>6.63 (1.68, 11.22)</b> | 0.89 (-1.48, 3.25)      | <b>4.89 (2.08, 7.69)</b>  | 2.20 (-3.75, 8.11)      | -6.09 (-144.60, 97.07)  | -25.77 (-221.00, 151.90)  | -0.75 (-6.50, 5.03)     | 66.40 (-22.05, 279.30) | -0.24 (-4.75, 4.28) | 0.36 (-3.04, 3.59) | Zone |

The values correspond to the difference in median HDL reduction between the row and column at 6 months (eg, the difference in median HDL reduction between the Atkins diet and Usual diet at 6 months is 3.41 mg/dL).

Table S58: GRADE assessment for 12-month weight loss in macronutrient composition NMA

| Comparison groups |                | Direct evidence |                 |             |                       |         |               |              |                  |                                   |             |                                |                                       |                        |
|-------------------|----------------|-----------------|-----------------|-------------|-----------------------|---------|---------------|--------------|------------------|-----------------------------------|-------------|--------------------------------|---------------------------------------|------------------------|
| Arm 1             | Arm 2 (Ref)    | No. of study    | No. of patients | I-square, % | MD (95% CrI)          | RoB     | Inconsistency | Indirectness | Publication bias | Direct rating without imprecision | Imprecision | Direct rating with imprecision | Direct is more precise than indirect? | Need to rate indirect? |
| Dietary advice    | Usual diet     |                 |                 |             |                       |         |               |              |                  |                                   |             |                                |                                       |                        |
| Low fat           | Usual diet     | 3               | 591             | 0.0         | 5.65 (2.27, 9.03)     | Serious | No            | No           | Undetected       | Mod                               | No          | Mod                            | Yes                                   | Yes                    |
| Low CHO           | Usual diet     | 1               | 36              | NA          | 2.11 (-1.51, 5.72)    | Serious | No            | Serious      | Undetected       | Low                               | V serious   | V low                          | No                                    | Yes                    |
| Moderate Macro    | Usual diet     | 5               | 1101            | 79.7        | 1.69 (0.109, 3.19)    | Serious | No            | Serious      | Undetected       | Low                               | Serious     | V low                          | Yes                                   | Yes                    |
| Low fat           | Dietary advice |                 |                 |             |                       |         |               |              |                  |                                   |             |                                |                                       |                        |
| Low CHO           | Dietary advice |                 |                 |             |                       |         |               |              |                  |                                   |             |                                |                                       |                        |
| Moderate Macro    | Dietary advice | 5               | 2111            | 71.1        | 4.00 (2.59, 5.59)     | No      | Serious       | No           | Undetected       | Mod                               | No          | Mod                            | NA                                    | No                     |
| Low CHO           | Low fat        | 4               | 382             | 35.9        | 0.481 (-1.36, 2.22)   | No      | No            | No           | Undetected       | High                              | Serious     | Mod                            | No                                    | Yes                    |
| Moderate Macro    | Low fat        | 8               | 2199            | 90.5        | -1.54 (-2.85, -0.288) | No      | No            | Serious      | Undetected       | Mod                               | Serious     | Low                            | Yes                                   | Yes                    |
| Moderate Macro    | Low CHO        | 21              | 2614            | 37.6        | -1.19 (-2.01, -0.351) | No      | No            | Serious      | Undetected       | Mod                               | Serious     | Low                            | Yes                                   | Yes                    |

Table S58 continued: GRADE assessment for 12-month weight loss in macronutrient composition NMA

| Comparison groups |                | Indirect evidence     |                     |                |                                     |             |                                  | Network evidence     |                      |                                                          |             |                 |                      |
|-------------------|----------------|-----------------------|---------------------|----------------|-------------------------------------|-------------|----------------------------------|----------------------|----------------------|----------------------------------------------------------|-------------|-----------------|----------------------|
| Arm 1             | Arm 2 (Ref)    | MD (95% CrI)          | Lowest of C1 and C2 | Intransitivity | Indirect rating without imprecision | Imprecision | Indirect rating with imprecision | MD (95% CrI)         | Incoherence, P-value | Higher rating of direct and indirect without imprecision | Incoherence | NMA Imprecision | Final network rating |
| Dietary advice    | Usual diet     | -2.13 (-4.35, -0.13)  | Low                 | No             | Low                                 | Serious     | V low                            | -2.13 (-4.35, -0.13) | NA                   | Low                                                      | No          | Serious         | V low                |
| Low fat           | Usual diet     | 3.04 (0.929, 5.11)    | Low                 | No             | Low                                 | Serious     | V low                            | 3.34 (1.70, 5.00)    | 0.536                | Mod                                                      | No          | No              | Mod                  |
| Low CHO           | Usual diet     | 3.25 (1.47, 4.97)     | Low                 | No             | Low                                 | No          | Low                              | 3.17 (1.56, 4.71)    | 0.618                | Low                                                      | No          | No              | Low                  |
| Moderate Macro    | Usual diet     | 10.6 (-2.19, 23.0)    | Low                 | No             | Low                                 | Serious     | V low                            | 1.90 (0.44, 3.30)    | 0.170                | Low                                                      | No          | Serious         | V low                |
| Low fat           | Dietary advice | 5.47 (3.67, 7.5)      | Mod                 | No             | Mod                                 | No          | Mod                              | 5.47 (3.67, 7.5)     | NA                   | Mod                                                      | No          | No              | Mod                  |
| Low CHO           | Dietary advice | 5.31 (3.64, 7.11)     | Mod                 | No             | Mod                                 | No          | Mod                              | 5.31 (3.64, 7.11)    | NA                   | Mod                                                      | No          | No              | Mod                  |
| Moderate Macro    | Dietary advice |                       |                     |                |                                     |             |                                  | 4.03 (2.57, 5.66)    | NA                   | Mod                                                      | No          | No              | Mod                  |
| Low CHO           | Low fat        | -0.679 (-2.39, 0.937) | Mod                 | No             | Mod                                 | Serious     | Low                              | -0.17 (-1.43, 1.00)  | 0.378                | High                                                     | No          | Serious         | Mod                  |
| Moderate Macro    | Low fat        | -1.51 (-4.38, 1.20)   | Mod                 | No             | Mod                                 | Serious     | Low                              | -1.44 (-2.58, -0.38) | 0.985                | Mod                                                      | No          | Serious         | Low                  |
| Moderate Macro    | Low CHO        | -1.98 (-4.89, 0.906)  | Mod                 | No             | Mod                                 | Serious     | Low                              | -1.27 (-2.06, -0.46) | 0.573                | Mod                                                      | No          | Serious         | Low                  |

Table S59: GRADE assessment for 12-month SBP reduction in macronutrient composition NMA

| Comparison groups |                | Direct evidence |                 |             |                     |         |               |              |                  |                                   |             |                                |                                       |                        |
|-------------------|----------------|-----------------|-----------------|-------------|---------------------|---------|---------------|--------------|------------------|-----------------------------------|-------------|--------------------------------|---------------------------------------|------------------------|
| Arm 1             | Arm 2 (Ref)    | No. of study    | No. of patients | I-square, % | MD (95% CrI)        | RoB     | Inconsistency | Indirectness | Publication bias | Direct rating without imprecision | Imprecision | Direct rating with imprecision | Direct is more precise than indirect? | Need to rate indirect? |
| Dietary advice    | Usual diet     |                 |                 |             |                     |         |               |              |                  |                                   |             |                                |                                       |                        |
| Low fat           | Usual diet     | 2               | 132             | 0.0         | 0.17 (-6.11, 6.34)  | Serious | No            | No           | Undetected       | Mod                               | Serious     | Low                            | No                                    | Yes                    |
| Low CHO           | Usual diet     | 1               | 51              | NA          | 12.50 (5.62, 19.3)  | Serious | No            | Serious      | Undetected       | Low                               | Serious     | V low                          | No                                    | Yes                    |
| Moderate Macro    | Usual diet     | 4               | 851             | 63.4        | -1.20 (-3.87, 1.47) | Serious | No            | Serious      | Undetected       | Low                               | No          | Low                            | Yes                                   | Yes                    |
| Low fat           | Dietary advice |                 |                 |             |                     |         |               |              |                  |                                   |             |                                |                                       |                        |
| Low CHO           | Dietary advice |                 |                 |             |                     |         |               |              |                  |                                   |             |                                |                                       |                        |
| Moderate Macro    | Dietary advice | 3               | 2050            | 0.0         | 1.03 (-0.84, 2.95)  | No      | No            | No           | Undetected       | High                              | Serious     | Mod                            | NA                                    | No                     |
| Low CHO           | Low fat        | 3               | 463             | 0.0         | 2.07 (-0.68, 4.60)  | No      | No            | No           | Undetected       | High                              | Serious     | Mod                            | No                                    | Yes                    |
| Moderate Macro    | Low fat        | 6               | 896             | 0.0         | 0.63 (-1.72, 3.06)  | No      | No            | Serious      | Undetected       | Mod                               | Serious     | Low                            | No                                    | Yes                    |
| Moderate Macro    | Low CHO        | 15              | 2022            | 16.8        | -0.38 (-1.76, 1.02) | Serious | No            | No           | Undetected       | Mod                               | Serious     | Low                            | No                                    | Yes                    |



Table S59 continued: GRADE assessment for 12-month SBP reduction in macronutrient composition NMA

| Comparison groups |                | Indirect evidence     |                     |                |                                     |             |                                  | Network evidence    |                      |                                                          |             |                 |                      |
|-------------------|----------------|-----------------------|---------------------|----------------|-------------------------------------|-------------|----------------------------------|---------------------|----------------------|----------------------------------------------------------|-------------|-----------------|----------------------|
| Arm 1             | Arm 2 (Ref)    | MD (95% CrI)          | Lowest of C1 and C2 | Intransitivity | Indirect rating without imprecision | Imprecision | Indirect rating with imprecision | MD (95% CrI)        | Incoherence, P-value | Higher rating of direct and indirect without imprecision | Incoherence | NMA Imprecision | Final network rating |
| Dietary advice    | Usual diet     | -0.53 (-4.18, 3.50)   | Low                 | No             | Low                                 | Serious     | V low                            | -0.53 (-4.18, 3.50) | NA                   | Low                                                      | No          | Serious         | V low                |
| Low fat           | Usual diet     | -0.58 (-4.43, 3.94)   | Low                 | No             | Low                                 | Serious     | V low                            | -0.32 (-3.47, 3.20) | 0.858                | Mod                                                      | No          | Serious         | Low                  |
| Low CHO           | Usual diet     | -1.01 (-4.03, 1.85)   | Low                 | No             | Low                                 | Serious     | V low                            | 1.32 (-1.64, 4.59)  | 0.001                | Low                                                      | Serious     | Serious         | V low                |
| Moderate Macro    | Usual diet     | -0.61 (-12.50, 11.70) | Low                 | No             | Low                                 | Serious     | V low                            | 0.49 (-2.18, 3.51)  | 0.968                | Low                                                      | No          | Serious         | V low                |
| Low fat           | Dietary advice | 0.23 (-3.15, 3.61)    | Mod                 | No             | Mod                                 | Serious     | Low                              | 0.23 (-3.15, 3.61)  | NA                   | Mod                                                      | No          | Serious         | Low                  |
| Low CHO           | Dietary advice | 1.04 (-1.57, 3.62)    | Mod                 | No             | Mod                                 | Serious     | Low                              | 1.04 (-1.57, 3.62)  | NA                   | Mod                                                      | No          | Serious         | Low                  |
| Moderate Macro    | Dietary advice |                       |                     |                |                                     |             |                                  | 1.03 (-0.84, 2.95)  | NA                   | High                                                     | No          | Serious         | Mod                  |
| Low CHO           | Low fat        | 1.32 (-2.22, 5.18)    | Low                 | No             | Low                                 | Serious     | V low                            | 1.63 (-0.73, 3.96)  | 0.845                | High                                                     | No          | Serious         | Mod                  |
| Moderate Macro    | Low fat        | 0.37 (-5.93, 6.77)    | Low                 | No             | Low                                 | Serious     | V low                            | 0.81 (-1.37, 2.97)  | 0.859                | Mod                                                      | No          | Serious         | Low                  |
| Moderate Macro    | Low CHO        | -0.65 (-7.10, 5.90)   | Low                 | No             | Low                                 | Serious     | V low                            | -0.82 (-2.37, 0.78) | 0.945                | Mod                                                      | No          | Serious         | Low                  |

Table S60: GRADE assessment for 12-month DBP reduction in macronutrient composition NMA

| Comparison groups |                | Direct evidence |                 |             |                      |         |               |              |                  |                                   |             |                                |                                       |                        |
|-------------------|----------------|-----------------|-----------------|-------------|----------------------|---------|---------------|--------------|------------------|-----------------------------------|-------------|--------------------------------|---------------------------------------|------------------------|
| Arm 1             | Arm 2 (Ref)    | No. of study    | No. of patients | I-square, % | MD (95% CrI)         | RoB     | Inconsistency | Indirectness | Publication bias | Direct rating without imprecision | Imprecision | Direct rating with imprecision | Direct is more precise than indirect? | Need to rate indirect? |
| Dietary advice    | Usual diet     |                 |                 |             |                      |         |               |              |                  |                                   |             |                                |                                       |                        |
| Low fat           | Usual diet     | 2               | 161             | 0.0         | -0.947 (-4.89, 3.02) | Serious | No            | No           | Undetected       | Mod                               | Serious     | Low                            | Yes                                   | Yes                    |
| Low CHO           | Usual diet     | 1               | 51              | NA          | 9.51 (1.34, 17.7)    | Serious | No            | Serious      | Undetected       | Low                               | Serious     | V low                          | No                                    | Yes                    |
| Moderate Macro    | Usual diet     | 4               | 851             | 84.6        | -0.18 (-2.39, 2.25)  | Serious | Serious       | Serious      | Undetected       | V low                             | Serious     | V low                          | Yes                                   | Yes                    |
| Low fat           | Dietary advice |                 |                 |             |                      |         |               |              |                  |                                   |             |                                |                                       |                        |
| Low CHO           | Dietary advice |                 |                 |             |                      |         |               |              |                  |                                   |             |                                |                                       |                        |
| Moderate Macro    | Dietary advice | 3               | 2050            | 0.0         | 1.19 (-0.397, 2.76)  | No      | No            | No           | Undetected       | High                              | Serious     | Mod                            | NA                                    | No                     |
| Low CHO           | Low fat        | 3               | 463             | 0.0         | 1.67 (-0.46, 3.71)   | No      | No            | No           | Undetected       | High                              | Serious     | Mod                            | No                                    | Yes                    |
| Moderate Macro    | Low fat        | 6               | 2066            | 24.1        | -1.03 (-2.76, 0.81)  | No      | No            | Serious      | Undetected       | Mod                               | Serious     | Low                            | Yes                                   | Yes                    |
| Moderate Macro    | Low CHO        | 15              | 2022            | 6.9         | -0.35 (-1.33, 0.76)  | Serious | No            | No           | Undetected       | Mod                               | Serious     | Low                            | Yes                                   | Yes                    |

Table S60 continued: GRADE assessment for 12-month DBP reduction in macronutrient composition NMA

| Comparison groups |                | Indirect evidence   |                     |                |                                     |             |                                  | Network evidence    |                      |                                                          |             |                 |                      |
|-------------------|----------------|---------------------|---------------------|----------------|-------------------------------------|-------------|----------------------------------|---------------------|----------------------|----------------------------------------------------------|-------------|-----------------|----------------------|
| Arm 1             | Arm 2 (Ref)    | MD (95% CrI)        | Lowest of C1 and C2 | Intransitivity | Indirect rating without imprecision | Imprecision | Indirect rating with imprecision | MD (95% CrI)        | Incoherence, P-value | Higher rating of direct and indirect without imprecision | Incoherence | NMA Imprecision | Final network rating |
| Dietary advice    | Usual diet     | -1.06 (-3.97, 2.34) | V low               | No             | V low                               | Serious     | V low                            | -1.06 (-3.97, 2.34) | NA                   | V low                                                    | No          | Serious         | V low                |
| Low fat           | Usual diet     | 0.87 (-2.28, 4.85)  | V low               | No             | V low                               | Serious     | V low                            | 0.24 (-2.23, 2.99)  | 0.479                | Mod                                                      | No          | Serious         | Low                  |
| Low CHO           | Usual diet     | -0.80 (-3.07, 1.38) | Mod                 | No             | V low                               | Serious     | V low                            | 0.78 (-1.63, 3.39)  | 0.007                | Low                                                      | No          | Serious         | Low                  |
| Moderate Macro    | Usual diet     | -0.85 (-8.32, 6.41) | Low                 | No             | Low                                 | Serious     | V low                            | 0.16 (-2.02, 2.63)  | 0.863                | Low                                                      | No          | Serious         | V low                |
| Low fat           | Dietary advice | 1.28 (-1.44, 4.00)  | Mod                 | No             | Mod                                 | Serious     | Low                              | 1.28 (-1.44, 4.00)  | NA                   | Mod                                                      | No          | Serious         | Low                  |
| Low CHO           | Dietary advice | 1.83 (-0.75, 4.21)  | Mod                 | No             | Mod                                 | Serious     | Low                              | 1.83 (-0.75, 4.21)  | NA                   | Mod                                                      | No          | Serious         | Low                  |
| Moderate Macro    | Dietary advice |                     |                     |                |                                     |             |                                  | 1.19 (-0.397, 2.76) | NA                   | High                                                     | No          | Serious         | Mod                  |
| Low CHO           | Low fat        | -0.98 (-3.53, 1.71) | Low                 | No             | Low                                 | Serious     | V low                            | 0.55 (-1.33, 2.27)  | 0.143                | High                                                     | No          | Serious         | Mod                  |
| Moderate Macro    | Low fat        | 0.16 (-4.59, 5.30)  | V low               | No             | V low                               | Serious     | V low                            | -0.07 (-1.74, 1.58) | 0.799                | Mod                                                      | No          | Serious         | Low                  |
| Moderate Macro    | Low CHO        | -1.27 (-5.75, 3.25) | V low               | No             | V low                               | Serious     | V low                            | -0.62 (-1.77, 0.65) | 0.695                | Mod                                                      | No          | Serious         | Low                  |

Table S61: GRADE assessment for 12-month LDL reduction in macronutrient composition NMA

| Comparison groups |                | Direct evidence |                 |             |                     |         |               |              |                  |                                   |             |                                |                                       |                        |  |
|-------------------|----------------|-----------------|-----------------|-------------|---------------------|---------|---------------|--------------|------------------|-----------------------------------|-------------|--------------------------------|---------------------------------------|------------------------|--|
| Arm 1             | Arm 2 (Ref)    | No. of study    | No. of patients | I-square, % | MD (95% CrI)        | RoB     | Inconsistency | Indirectness | Publication bias | Direct rating without imprecision | Imprecision | Direct rating with imprecision | Direct is more precise than indirect? | Need to rate indirect? |  |
| Dietary advice    | Usual diet     |                 |                 |             |                     |         |               |              |                  |                                   |             |                                |                                       |                        |  |
| Low fat           | Usual diet     | 2               | 161             | 88.5        | 5.59 (-4.07, 15.60) | Serious | Serious       | No           | Undetected       | Low                               | Serious     | V low                          | No                                    | Yes                    |  |
| Low CHO           | Usual diet     | 1               | 51              | NA          | 27.00 (7.81, 46.30) | Serious | No            | Serious      | Undetected       | Low                               | Serious     | V low                          | No                                    | Yes                    |  |
| Moderate Macro    | Usual diet     | 5               | 952             | 0.0         | -1.24 (-6.67, 4.37) | Serious | No            | Serious      | Undetected       | Low                               | Serious     | V low                          | Yes                                   | Yes                    |  |
| Low fat           | Dietary advice |                 |                 |             |                     |         |               |              |                  |                                   |             |                                |                                       |                        |  |
| Low CHO           | Dietary advice |                 |                 |             |                     |         |               |              |                  |                                   |             |                                |                                       |                        |  |
| Moderate Macro    | Dietary advice | 4               | 1648            | 54.6        | 2.04 (-1.18, 5.78)  | No      | No            | No           | Undetected       | High                              | Serious     | Mod                            | NA                                    | NA                     |  |
| Low CHO           | Low fat        | 4               | 463             | 0.0         | -4.02 (-9.34, 1.25) | No      | No            | No           | Undetected       | High                              | Serious     | Mod                            | Yes                                   | Yes                    |  |
| Moderate Macro    | Low fat        | 6               | 888             | 0.0         | -0.28 (-5.54, 4.78) | No      | No            | No           | Undetected       | High                              | Serious     | Mod                            | Yes                                   | Yes                    |  |
| Moderate Macro    | Low CHO        | 17              | 2217            | 0.7         | 0.38 (-2.16, 3.06)  | Serious | No            | Serious      | Undetected       | Low                               | Serious     | V low                          | Yes                                   | Yes                    |  |

Table S61 continued: GRADE assessment for 12-month LDL reduction in macronutrient composition NMA

| Comparison groups |                | Indirect evidence    |                     |                |                                     |             |                                  | Network evidence    |                      |                                                          |             |                 |                      |
|-------------------|----------------|----------------------|---------------------|----------------|-------------------------------------|-------------|----------------------------------|---------------------|----------------------|----------------------------------------------------------|-------------|-----------------|----------------------|
| Arm 1             | Arm 2 (Ref)    | MD (95% CrI)         | Lowest of C1 and C2 | Intransitivity | Indirect rating without imprecision | Imprecision | Indirect rating with imprecision | MD (95% CrI)        | Incoherence, P-value | Higher rating of direct and indirect without imprecision | Incoherence | NMA Imprecision | Final network rating |
| Dietary advice    | Usual diet     | -0.70 (-6.82, 5.70)  | Low                 | No             | Low                                 | Serious     | V low                            | -0.70 (-6.82, 5.70) | NA                   | Low                                                      | No          | Serious         | V low                |
| Low fat           | Usual diet     | 2.92 (-4.22, 10.40)  | Low                 | No             | Low                                 | Serious     | V low                            | 3.74 (-2.11, 9.79)  | 0.68                 | Low                                                      | No          | Serious         | V low                |
| Low CHO           | Usual diet     | -1.28 (-6.63, 4.13)  | Low                 | No             | Low                                 | Serious     | V low                            | 1.14 (-4.21, 6.72)  | 0.005                | Low                                                      | No          | Serious         | V low                |
| Moderate Macro    | Usual diet     | 45.30 (15.10, 75.40) | Low                 | No             | Low                                 | Serious     | V low                            | 1.43 (-3.51, 6.60)  | 0.002                | Low                                                      | No          | Serious         | V low                |
| Low fat           | Dietary advice | 4.47 (-0.72, 10.24)  | High                | No             | High                                | Serious     | Mod                              | 4.47 (-0.72, 10.24) | NA                   | High                                                     | No          | Serious         | Mod                  |
| Low CHO           | Dietary advice | 1.85 (-2.55, 6.80)   | Low                 | No             | Low                                 | Serious     | V low                            | 1.85 (-2.55, 6.80)  | NA                   | Low                                                      | No          | Serious         | V low                |
| Moderate Macro    | Dietary advice |                      |                     |                |                                     |             |                                  | 1.04 (-1.57, 3.62)  | NA                   | High                                                     | No          | Serious         | Mod                  |
| Low CHO           | Low fat        | -0.08 (-6.81, 6.32)  | Low                 | No             | Low                                 | Serious     | V low                            | -2.61 (-6.67, 1.36) | 0.32                 | High                                                     | No          | Serious         | Mod                  |
| Moderate Macro    | Low fat        | -5.78 (-17.00, 4.70) | Low                 | No             | Low                                 | Serious     | V low                            | -2.29 (-6.14, 1.55) | 0.49                 | High                                                     | No          | Serious         | Mod                  |
| Moderate Macro    | Low CHO        | 0.28 (-11.20, 11.60) | Low                 | No             | Low                                 | Serious     | V low                            | 0.31 (-2.28, 2.95)  | 0.99                 | Low                                                      | No          | Serious         | V low                |

Table S62: GRADE assessment for 12-month HDL increase in macronutrient composition NMA

| Comparison groups |                | Direct evidence |                 |             |                      |         |               |              |                  |                                   |             |                                |                                       |                        |
|-------------------|----------------|-----------------|-----------------|-------------|----------------------|---------|---------------|--------------|------------------|-----------------------------------|-------------|--------------------------------|---------------------------------------|------------------------|
| Arm 1             | Arm 2 (Ref)    | No. of study    | No. of patients | I-square, % | MD (95% CrI)         | RoB     | Inconsistency | Indirectness | Publication bias | Direct rating without imprecision | Imprecision | Direct rating with imprecision | Direct is more precise than indirect? | Need to rate indirect? |
| Dietary advice    | Usual diet     |                 |                 |             |                      |         |               |              |                  |                                   |             |                                |                                       |                        |
| Low fat           | Usual diet     | 2               | 161             | 0.0         | -1.57 (-6.25, 3.17)  | Serious | No            | No           | Undetected       | Mod                               | Serious     | Low                            | No                                    | Yes                    |
| Low CHO           | Usual diet     | 1               | 51              | NA          | 0.02 (-8.16, 8.19)   | Serious | No            | Serious      | Undetected       | Low                               | Serious     | V low                          | No                                    | Yes                    |
| Moderate Macro    | Usual diet     | 5               | 952             | 69.8        | -3.21 (-5.84, -0.62) | Serious | No            | Serious      | Undetected       | Low                               | Serious     | V low                          | Yes                                   | Yes                    |
| Low fat           | Dietary advice |                 |                 |             |                      |         |               |              |                  |                                   |             |                                |                                       |                        |
| Low CHO           | Dietary advice |                 |                 |             |                      |         |               |              |                  |                                   |             |                                |                                       |                        |
| Moderate Macro    | Dietary advice | 4               | 1663            | 0.0         | 1.50 (-1.26, 4.28)   | No      | No            | No           | Undetected       | High                              | Serious     | Mod                            | NA                                    | No                     |
| Low CHO           | Low fat        | 4               | 463             | 53.4        | 2.52 (-0.59, 5.55)   | No      | No            | No           | Undetected       | High                              | Serious     | Mod                            | No                                    | Yes                    |
| Moderate Macro    | Low fat        | 6               | 652             | 5.7         | 0.67 (-1.67, 3.11)   | No      | No            | Serious      | Undetected       | Mod                               | Serious     | Low                            | Yes                                   | Yes                    |
| Moderate Macro    | Low CHO        | 17              | 2155            | 65.3        | -2.94 (-4.37, -1.57) | Serious | No            | Serious      | Undetected       | Low                               | Serious     | V low                          | Yes                                   | Yes                    |

Table S62 continued: GRADE assessment for 12-month HDL increase in macronutrient composition NMA

| Comparison groups |                | Indirect evidence      |                     |                |                                     |             |                                  | Network evidence     |                      |                                                          |             |                 |                      |
|-------------------|----------------|------------------------|---------------------|----------------|-------------------------------------|-------------|----------------------------------|----------------------|----------------------|----------------------------------------------------------|-------------|-----------------|----------------------|
| Arm 1             | Arm 2 (Ref)    | MD (95% CrI)           | Lowest of C1 and C2 | Intransitivity | Indirect rating without imprecision | Imprecision | Indirect rating with imprecision | MD (95% CrI)         | Incoherence, P-value | Higher rating of direct and indirect without imprecision | Incoherence | NMA Imprecision | Final network rating |
| Dietary advice    | Usual diet     | -4.32 (-7.88, -0.75)   | Low                 | No             | Low                                 | Serious     | V low                            | -4.32 (-7.88, -0.75) | NA                   | Low                                                      | No          | Serious         | V low                |
| Low fat           | Usual diet     | -3.63 (-7.14, -0.0823) | Low                 | No             | Low                                 | Serious     | V low                            | -2.89 (-5.62, -0.13) | 0.484                | Mod                                                      | No          | Serious         | Low                  |
| Low CHO           | Usual diet     | 0.51 (-2.21, 3.33)     | Low                 | No             | Low                                 | Serious     | V low                            | 0.09 (-2.46, 2.68)   | 0.896                | Low                                                      | No          | Serious         | V low                |
| Moderate Macro    | Usual diet     | 0.96 (-10.10, 12.00)   | Low                 | No             | Low                                 | Serious     | V low                            | -2.80 (-5.09, -0.49) | 0.461                | Low                                                      | No          | Serious         | V low                |
| Low fat           | Dietary advice | 1.41 (-1.9, 4.76)      | Mod                 | No             | Mod                                 | Serious     | Low                              | 1.41 (-1.9, 4.76)    | NA                   | Mod                                                      | No          | Serious         | Low                  |
| Low CHO           | Dietary advice | 4.38 (1.37, 7.45)      | Low                 | No             | Low                                 | Serious     | V low                            | 4.38 (1.37, 7.45)    | NA                   | Low                                                      | No          | Serious         | V low                |
| Moderate Macro    | Dietary advice |                        |                     |                |                                     |             |                                  | 1.50 (-1.23, 4.25)   | NA                   | High                                                     | No          | Serious         | Mod                  |
| Low CHO           | Low fat        | 2.99 (0.120, 5.93)     | Low                 | No             | Low                                 | Serious     | V low                            | 2.97 (0.93, 5.04)    | 0.860                | High                                                     | No          | Serious         | Mod                  |
| Moderate Macro    | Low fat        | -4.41 (-9.41, 0.578)   | Low                 | No             | Low                                 | Serious     | V low                            | 0.089 (-1.83, 1.99)  | 0.047                | Mod                                                      | No          | Serious         | Low                  |
| Moderate Macro    | Low CHO        | 1.13 (-4.68, 6.92)     | Low                 | No             | Low                                 | Serious     | V low                            | -2.89 (-4.22, -1.58) | 0.174                | Low                                                      | No          | Serious         | V low                |

Table S63: GRADE assessment for 12-month CRP reduction in macronutrient composition NMA

| Comparison groups |                | Direct evidence |                 |             |                     |         |               |              |                  |                                   |             |                                |                                       |                        |
|-------------------|----------------|-----------------|-----------------|-------------|---------------------|---------|---------------|--------------|------------------|-----------------------------------|-------------|--------------------------------|---------------------------------------|------------------------|
| Arm 1             | Arm 2 (Ref)    | No. of study    | No. of patients | I-square, % | MD (95% CrI)        | RoB     | Inconsistency | Indirectness | Publication bias | Direct rating without imprecision | Imprecision | Direct rating with imprecision | Direct is more precise than indirect? | Need to rate indirect? |
| Dietary advice    | Usual diet     |                 |                 |             |                     |         |               |              |                  |                                   |             |                                |                                       |                        |
| Low fat           | Usual diet     |                 |                 |             |                     |         |               |              |                  |                                   |             |                                |                                       |                        |
| Low CHO           | Usual diet     | 1               | 51              | NA          | 0.26 (-4.44, 5.02)  | Serious | No            | Serious      | Undetected       | Low                               | Serious     | V low                          | No                                    | Yes                    |
| Moderate Macro    | Usual diet     | 2               | 152             | 0.0         | 0.15 (-1.01, 1.41)  | No      | No            | Serious      | Undetected       | Mod                               | Serious     | Low                            | NA                                    | No                     |
| Low fat           | Dietary advice |                 |                 |             |                     |         |               |              |                  |                                   |             |                                |                                       |                        |
| Low CHO           | Dietary advice |                 |                 |             |                     |         |               |              |                  |                                   |             |                                |                                       |                        |
| Moderate Macro    | Dietary advice |                 |                 |             |                     |         |               |              |                  |                                   |             |                                |                                       |                        |
| Low CHO           | Low fat        | 1               | 93              | NA          | -0.67 (-2.93, 1.55) | No      | No            | Serious      | Undetected       | Mod                               | Serious     | Low                            | NA                                    | No                     |
| Moderate Macro    | Low fat        | 1               | 93              | NA          | -0.87 (-3.40, 1.68) | No      | No            | Serious      | Undetected       | Mod                               | Serious     | Low                            | NA                                    | No                     |
| Moderate Macro    | Low CHO        | 7               | 873             | 39.2        | 0.16 (-0.62, 0.88)  | Serious | No            | Serious      | Undetected       | Low                               | Serious     | V low                          | NA                                    | No                     |



Table S63 continued: GRADE assessment for 12-month CRP reduction in macronutrient composition NMA

| Comparison groups |                | Indirect evidence   |                     |                |                                     |             |                                  | Network evidence    |                      |                                                          |             |                 |                      |
|-------------------|----------------|---------------------|---------------------|----------------|-------------------------------------|-------------|----------------------------------|---------------------|----------------------|----------------------------------------------------------|-------------|-----------------|----------------------|
| Arm 1             | Arm 2 (Ref)    | MD (95% CrI)        | Lowest of C1 and C2 | Intransitivity | Indirect rating without imprecision | Imprecision | Indirect rating with imprecision | MD (95% CrI)        | Incoherence, P-value | Higher rating of direct and indirect without imprecision | Incoherence | NMA Imprecision | Final network rating |
| Dietary advice    | Usual diet     |                     |                     |                |                                     |             |                                  |                     |                      |                                                          |             |                 |                      |
| Low fat           | Usual diet     | 0.86 (-1.18, 3.00)  | Low                 | No             | Low                                 | Serious     | V low                            | 0.86 (-1.18, 3.00)  | NA                   | Low                                                      | No          | Serious         | V low                |
| Low CHO           | Usual diet     | -0.02 (-2.34, 2.69) | Low                 | No             | Low                                 | Serious     | V low                            | 0.02 (-1.22, 1.39)  | 0.90                 | Low                                                      | No          | Serious         | V low                |
| Moderate Macro    | Usual diet     |                     |                     |                |                                     |             |                                  | 0.15 (-0.9, 1.33)   | NA                   | Mod                                                      | No          | Serious         | Low                  |
| Low fat           | Dietary advice |                     |                     |                |                                     |             |                                  |                     |                      |                                                          |             |                 |                      |
| Low CHO           | Dietary advice |                     |                     |                |                                     |             |                                  |                     |                      |                                                          |             |                 |                      |
| Moderate Macro    | Dietary advice |                     |                     |                |                                     |             |                                  |                     |                      |                                                          |             |                 |                      |
| Low CHO           | Low fat        |                     |                     |                |                                     |             |                                  | -0.85 (-2.62, 0.93) | NA                   | Mod                                                      | No          | Serious         | Low                  |
| Moderate Macro    | Low fat        |                     |                     |                |                                     |             |                                  | -0.7 (-2.51, 1.08)  | NA                   | Mod                                                      | No          | Serious         | Low                  |
| Moderate Macro    | Low CHO        |                     |                     |                |                                     |             |                                  | 0.15 (-0.57, 0.83)  | NA                   | Low                                                      | No          | Serious         | V low                |

Figure S1: Network plots for weight loss

**A: 6-month weight loss**

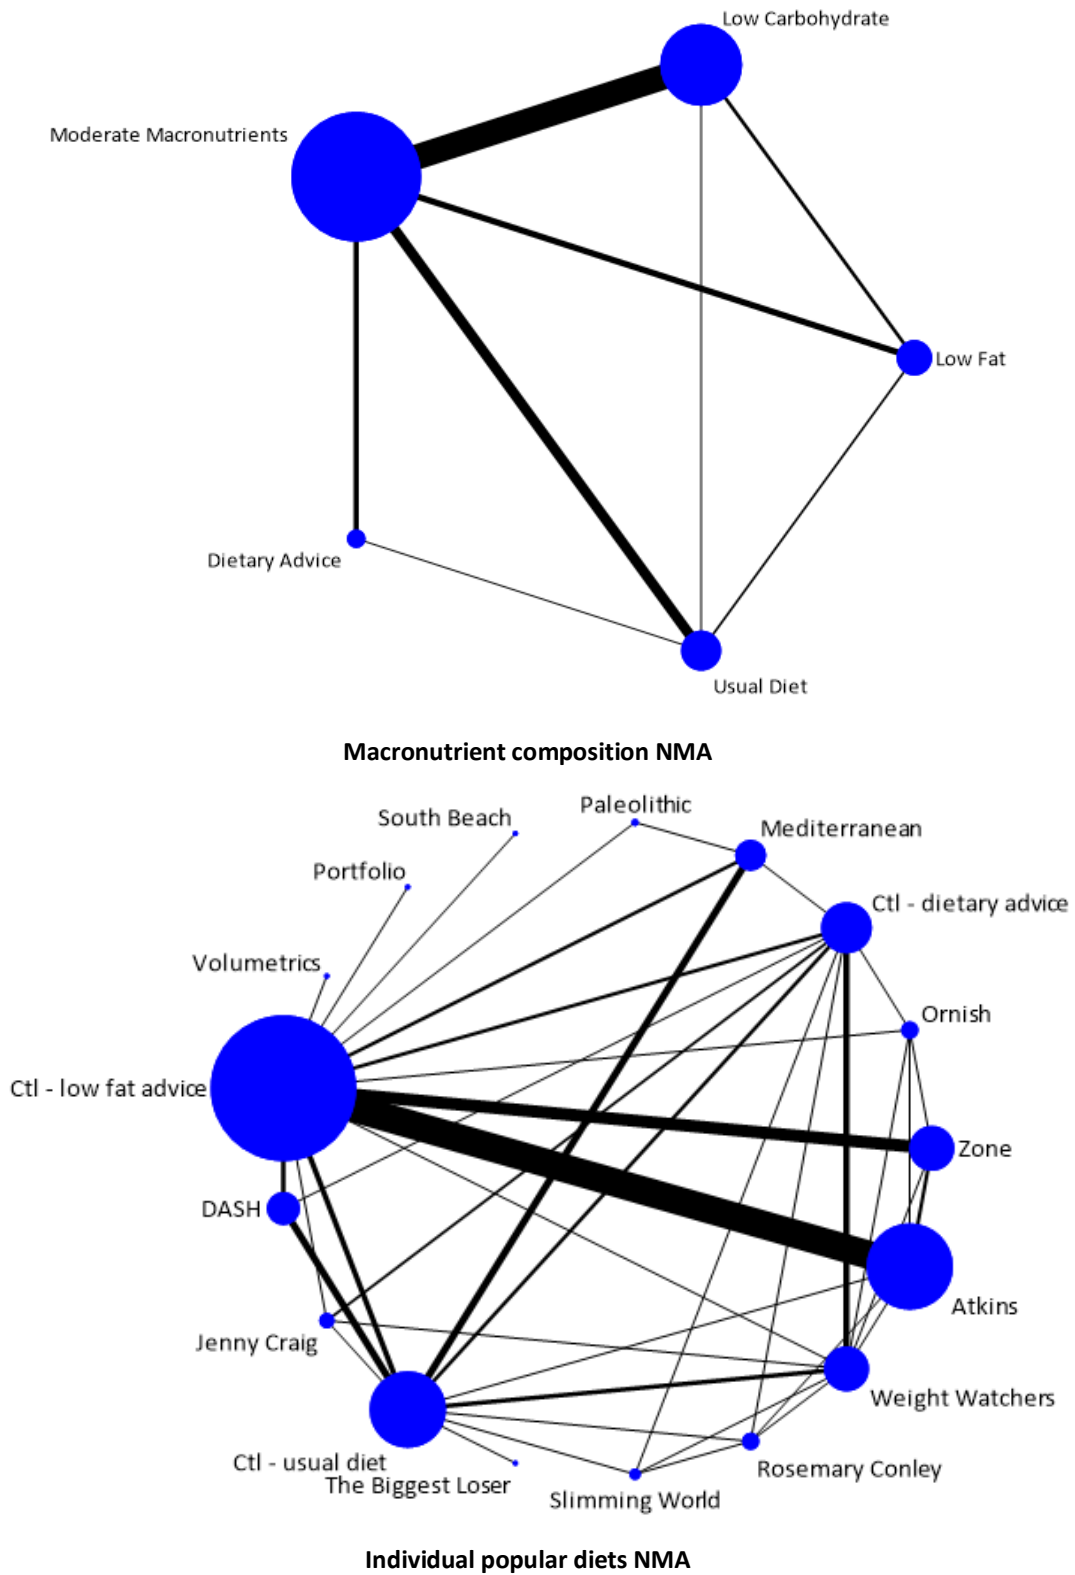

**B: 12-month weight loss**

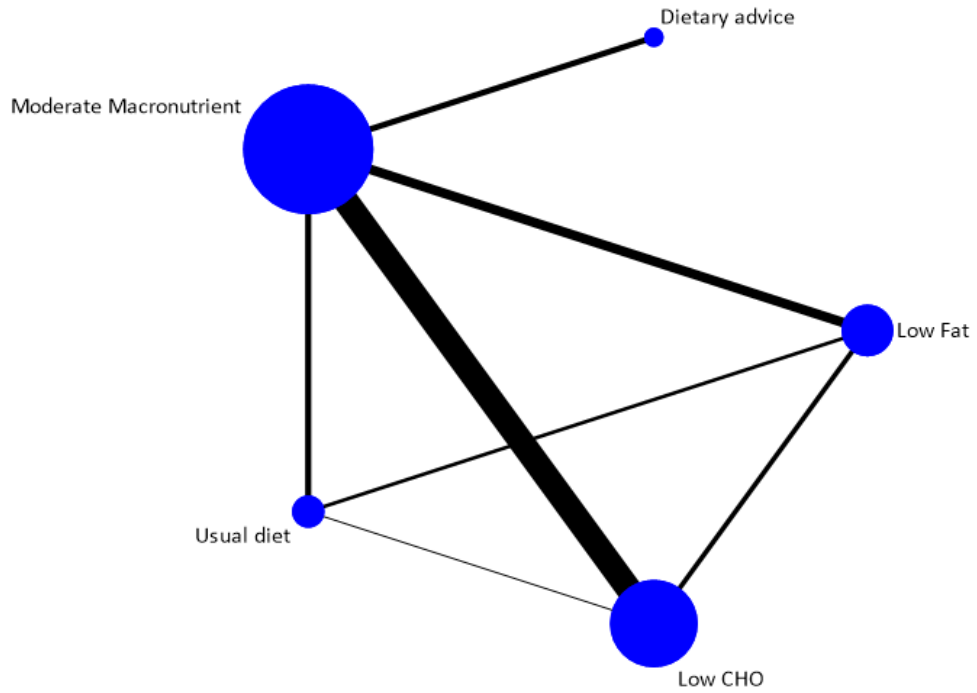

**Macronutrient composition NMA**

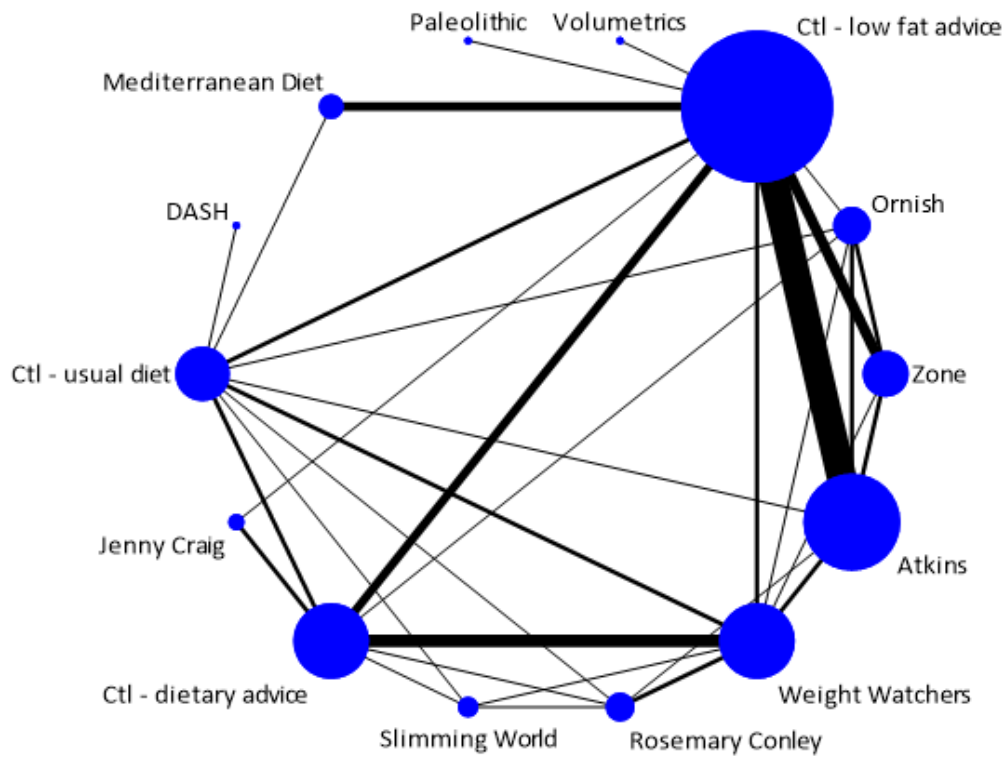

**Individual popular diets NMA**

Figure S2: Network plots for SBP reduction

**A: 6-month SBP reduction**

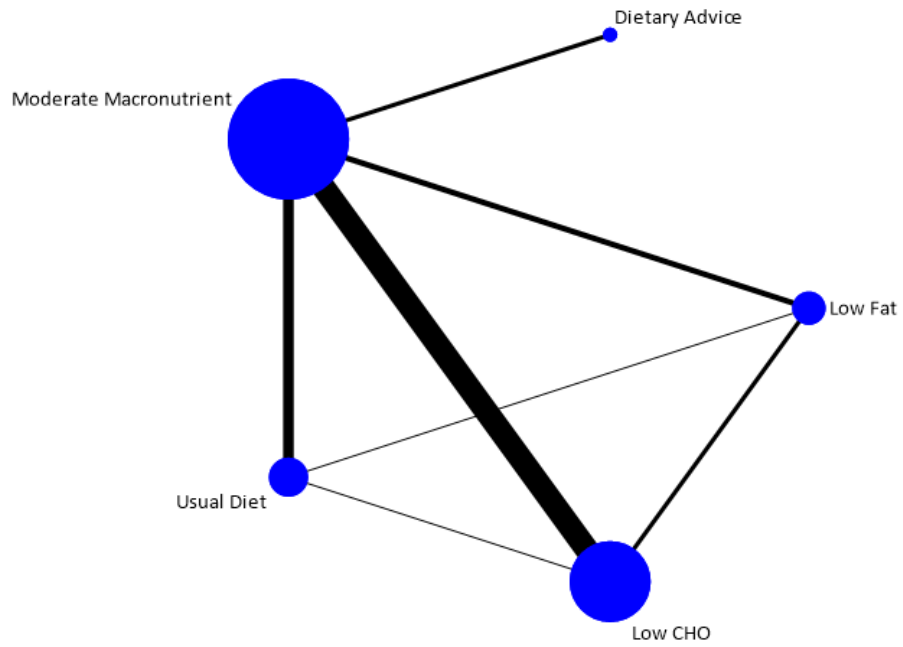

**Macronutrient composition NMA**

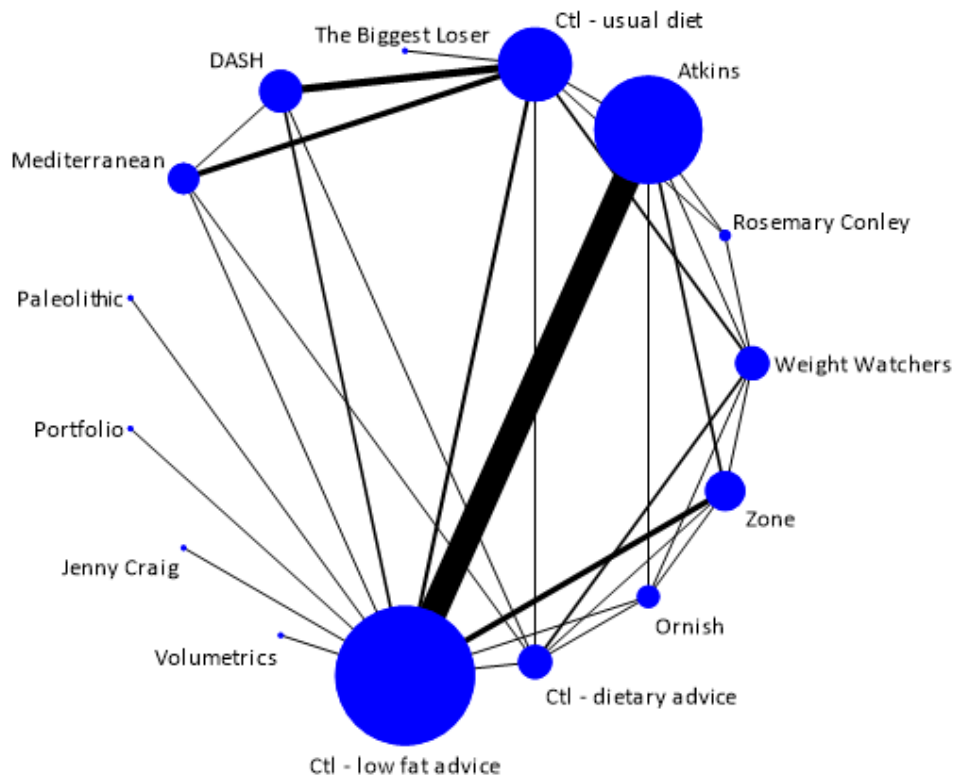

**Individual popular diets NMA**

**B: 12-month SBP reduction**

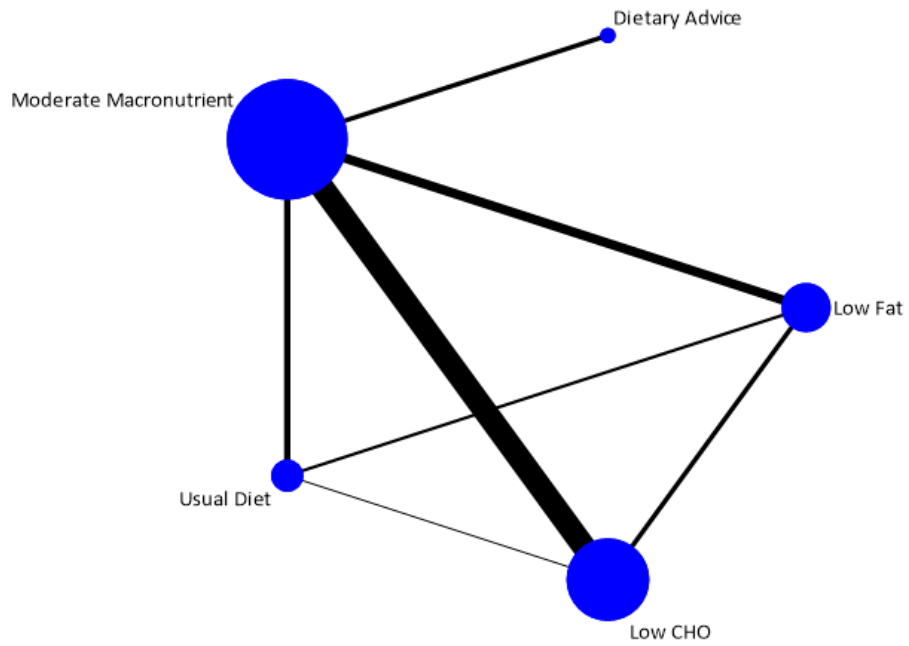

**Macronutrient composition NMA**

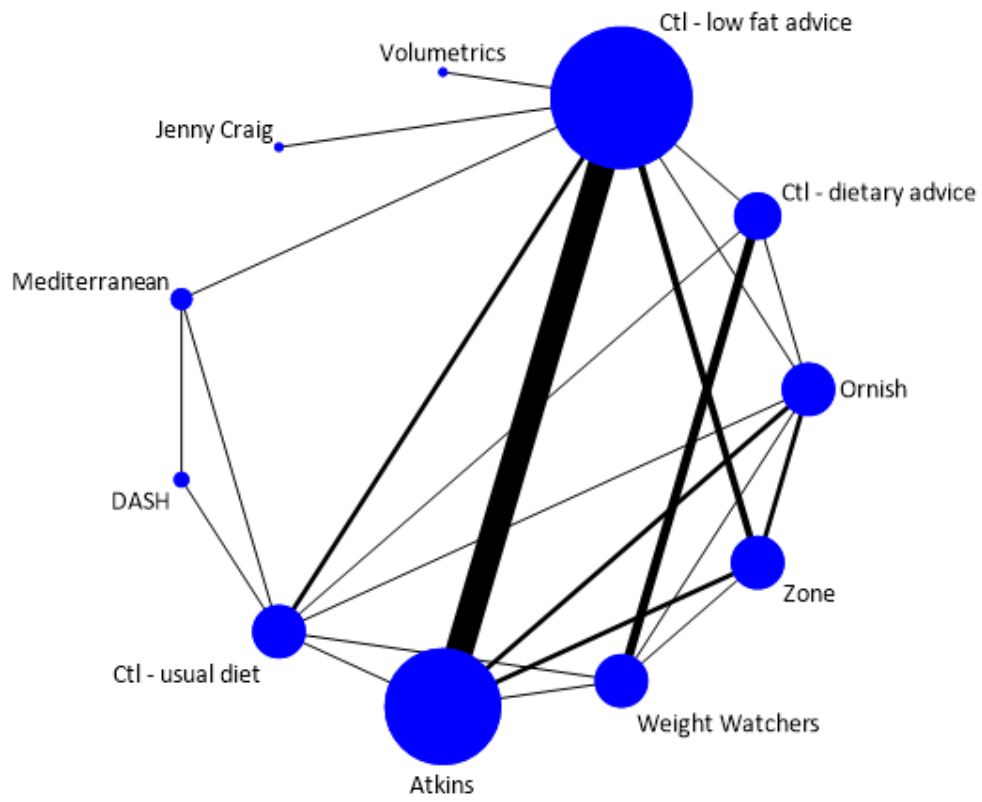

**Individual popular diets NMA**

Figure S3: Network plots for DBP reduction

**A: 6-month DBP reduction**

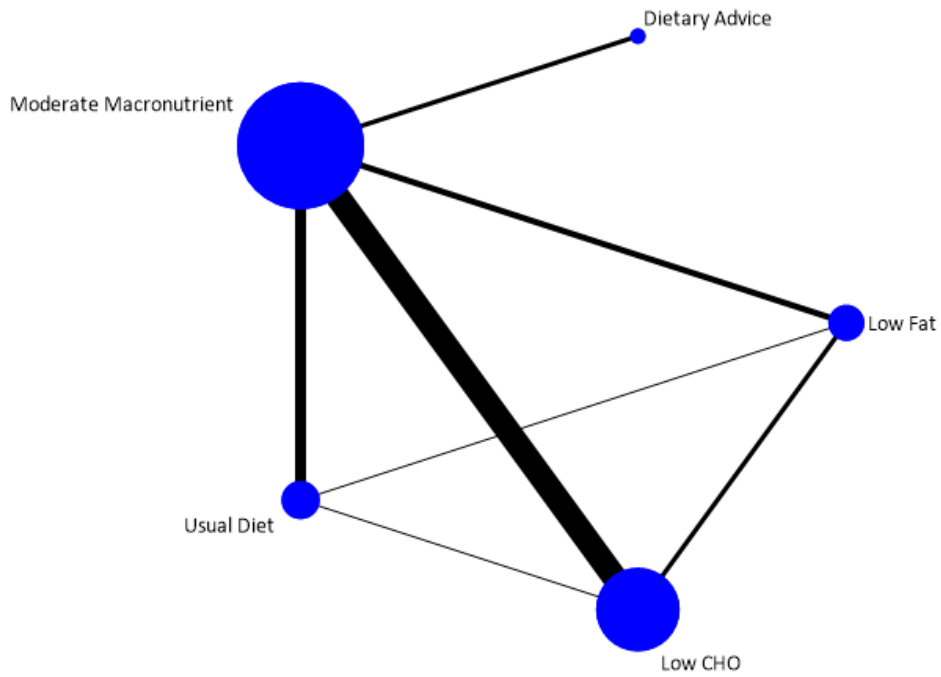

**Macronutrient composition NMA**

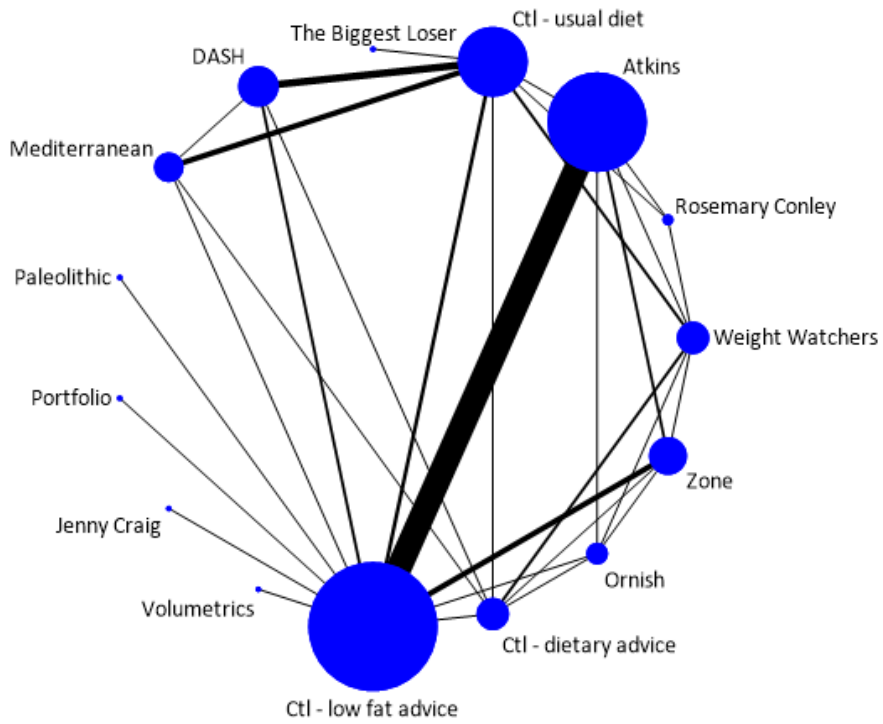

**Individual popular diets NMA**

**B: 12-month DBP reduction**

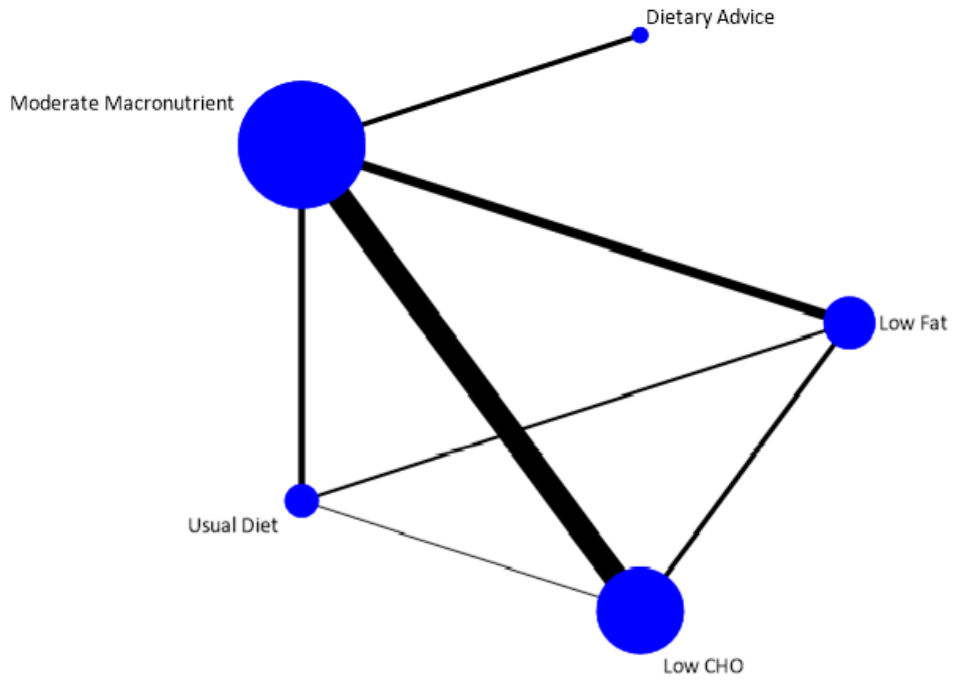

**Macronutrient composition NMA**

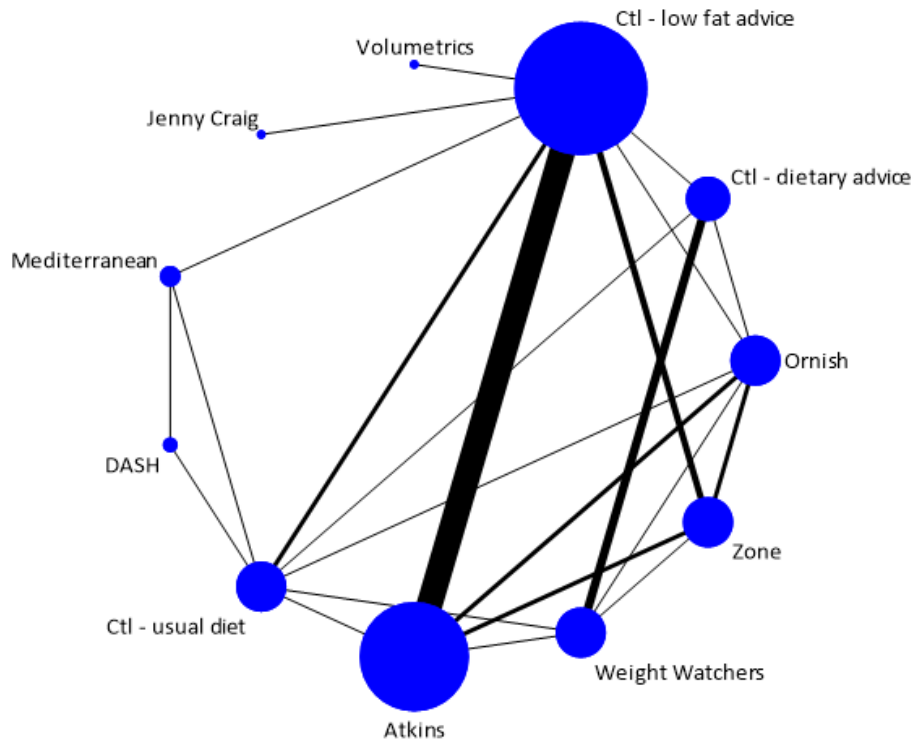

**Individual popular diets NMA**

Figure S4: Network plots for LDL reduction

**A: 6-month LDL reduction**

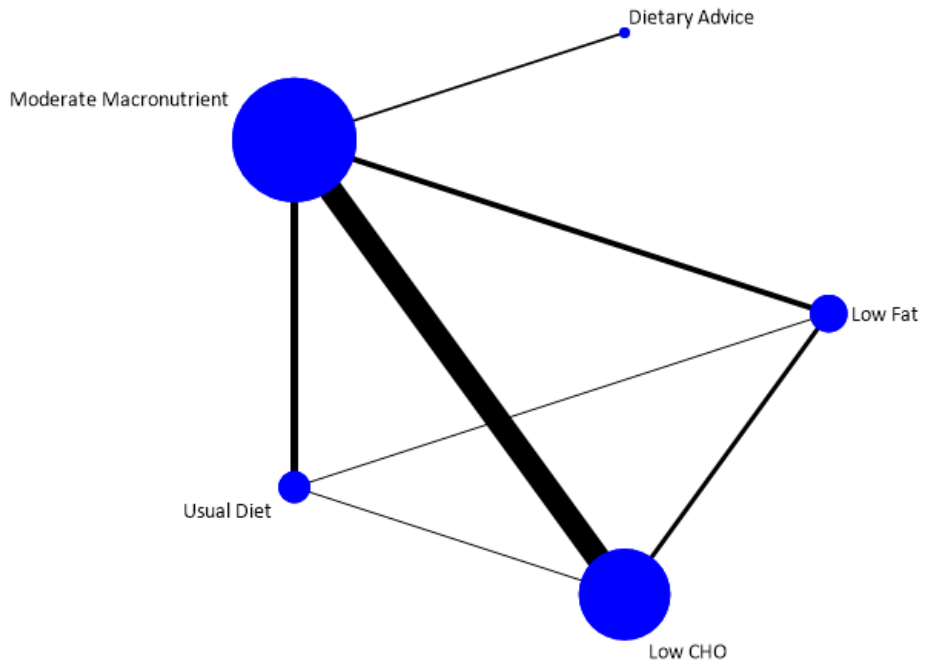

**Macronutrient composition NMA**

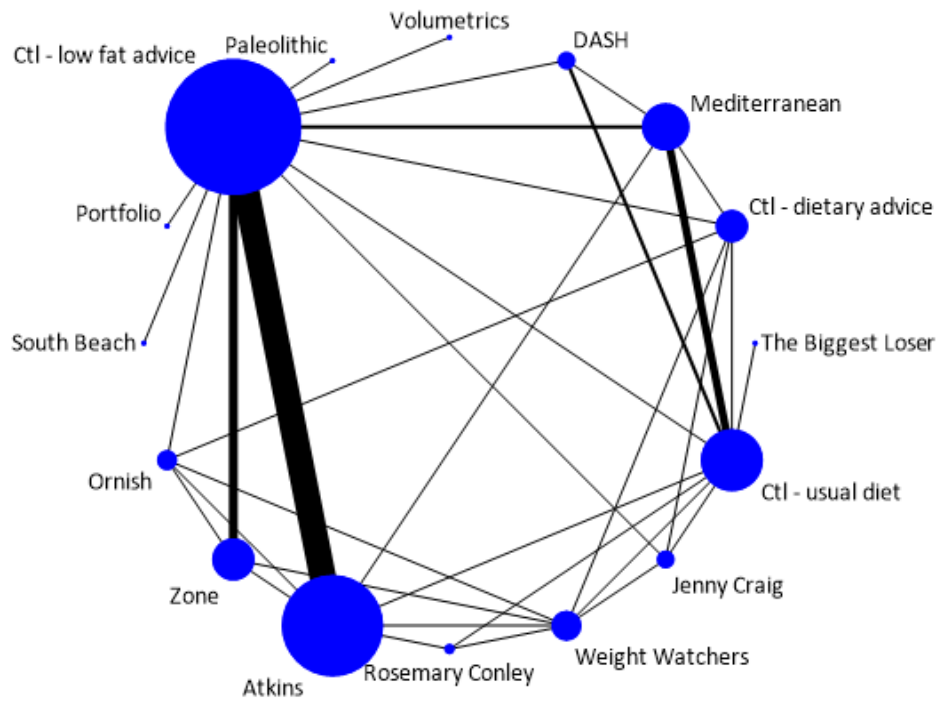

**Individual popular diets NMA**



**B: 12-month LDL reduction**

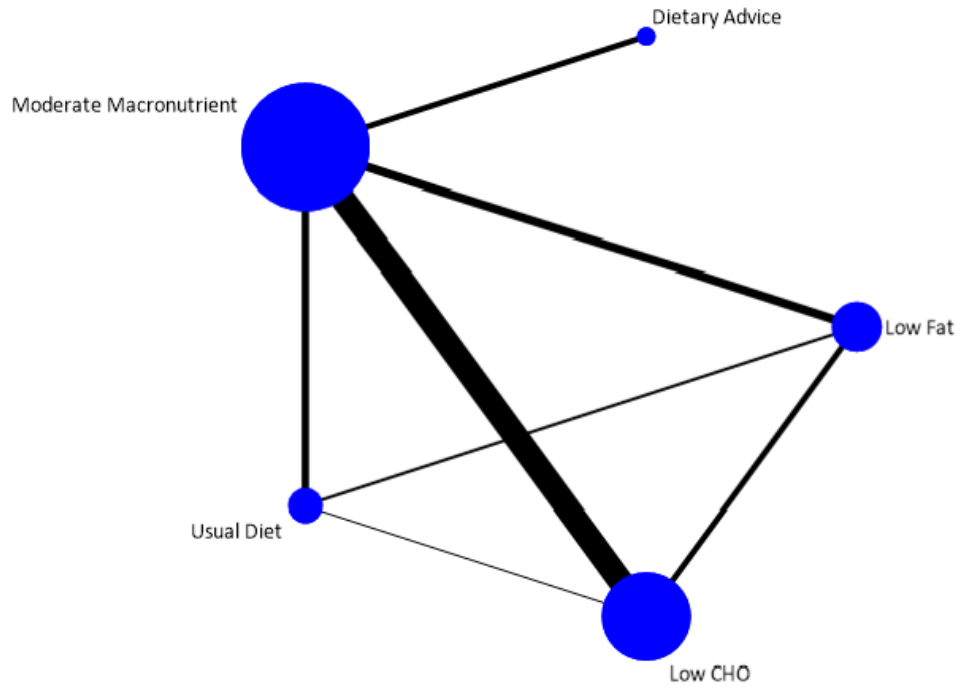

**Macronutrient composition NMA**

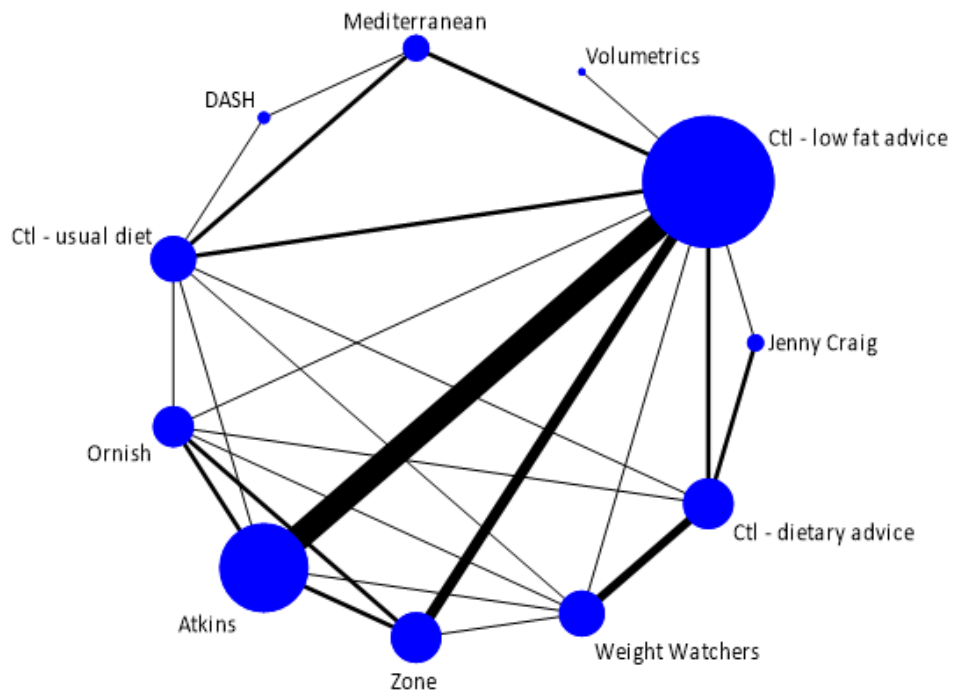

**Individual popular diets NMA**

Figure S5: Network plots for HDL increase

**A: 6-month HDL increase**

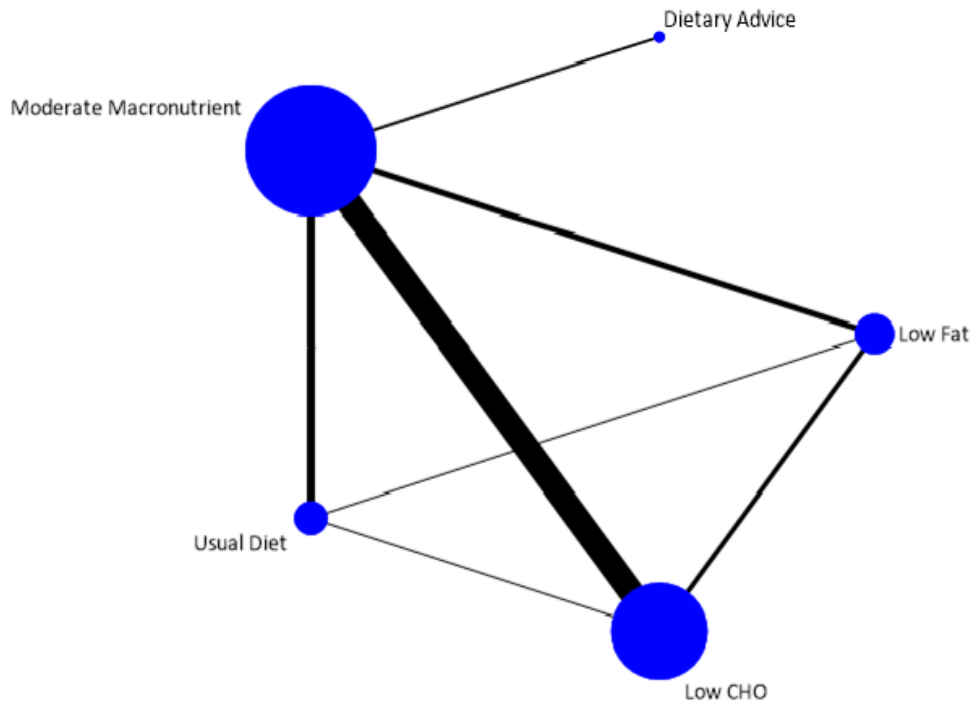

**Macronutrient composition NMA**

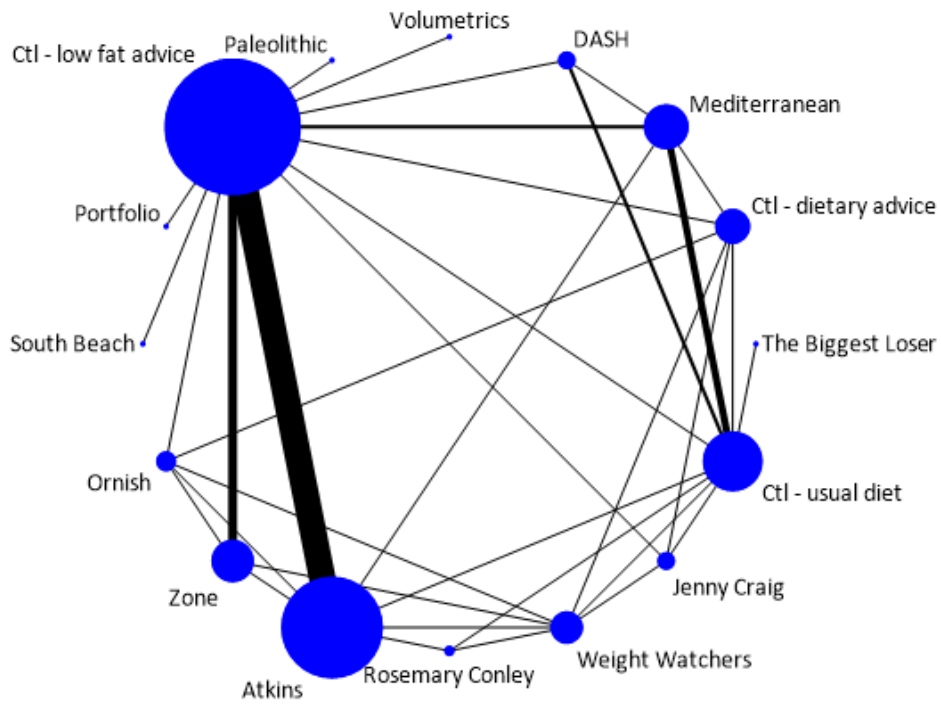

**Individual popular diets NMA**

**B: 12-month HDL increase**

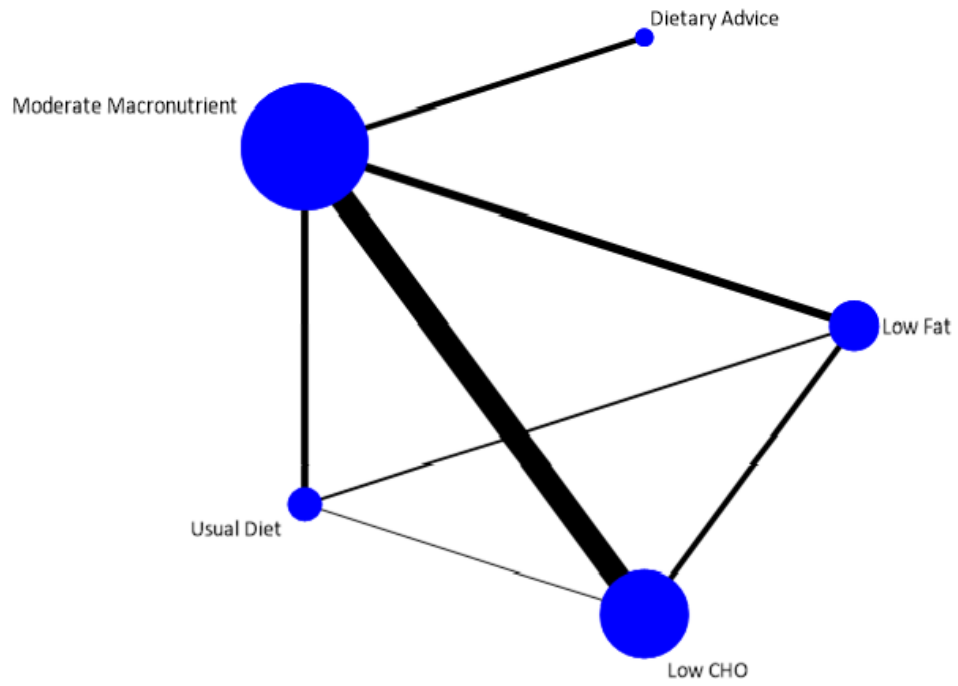

**Macronutrient composition NMA**

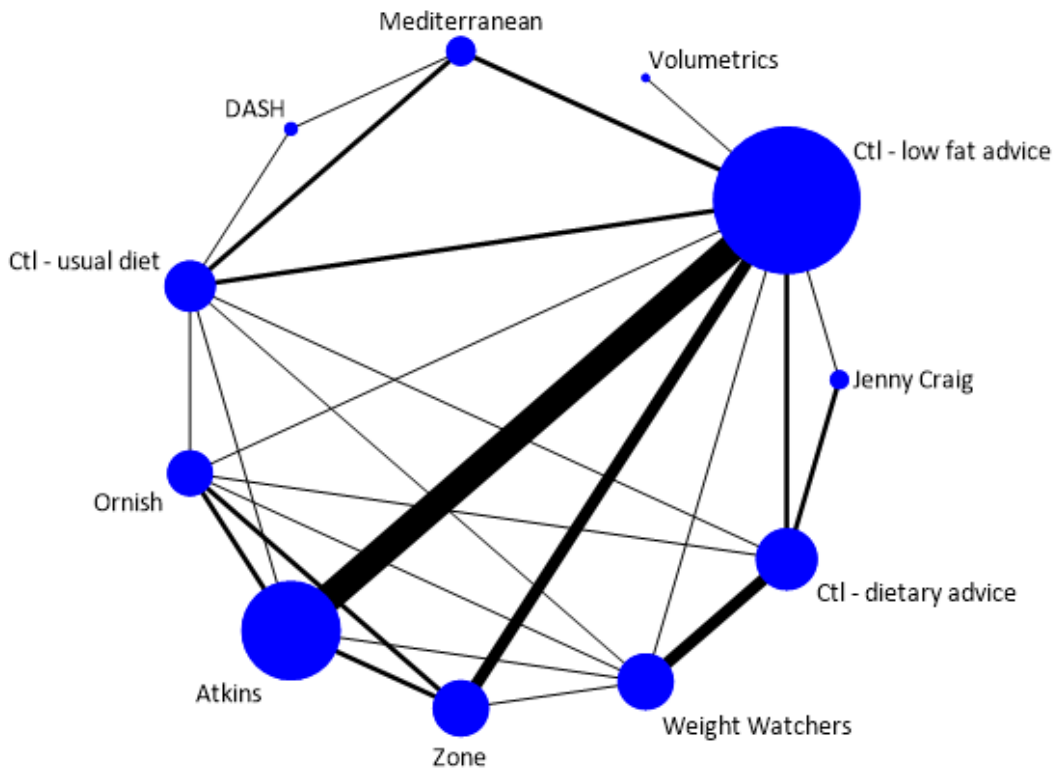

**Individual popular diets NMA**

Figure S6: Network plots for CRP reduction

A: 6-month CRP reduction

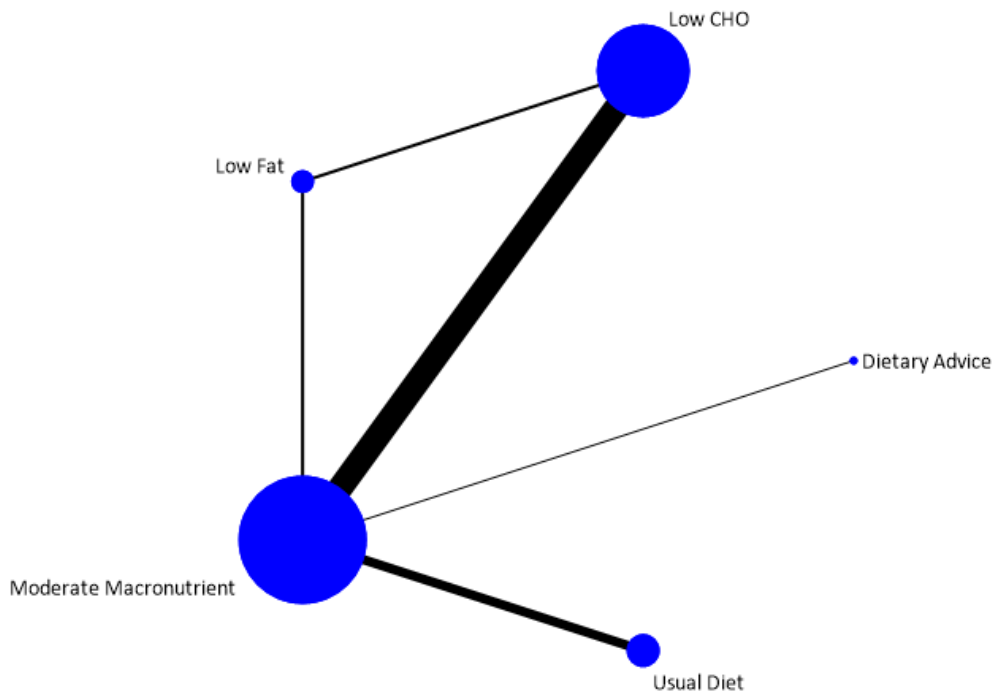

Macronutrient composition NMA

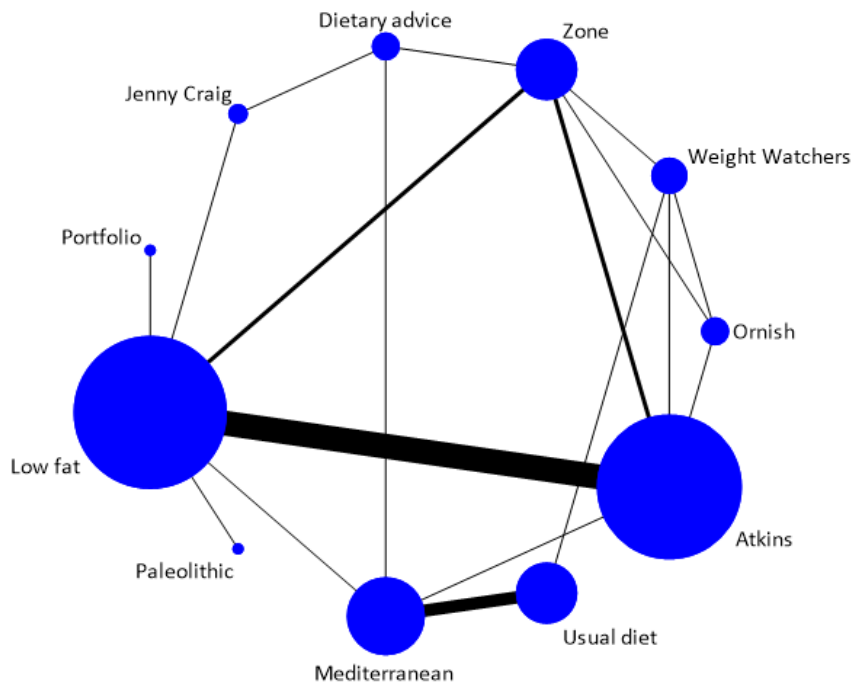

Individual popular diets NMA

**B: 12-month CRP reduction**

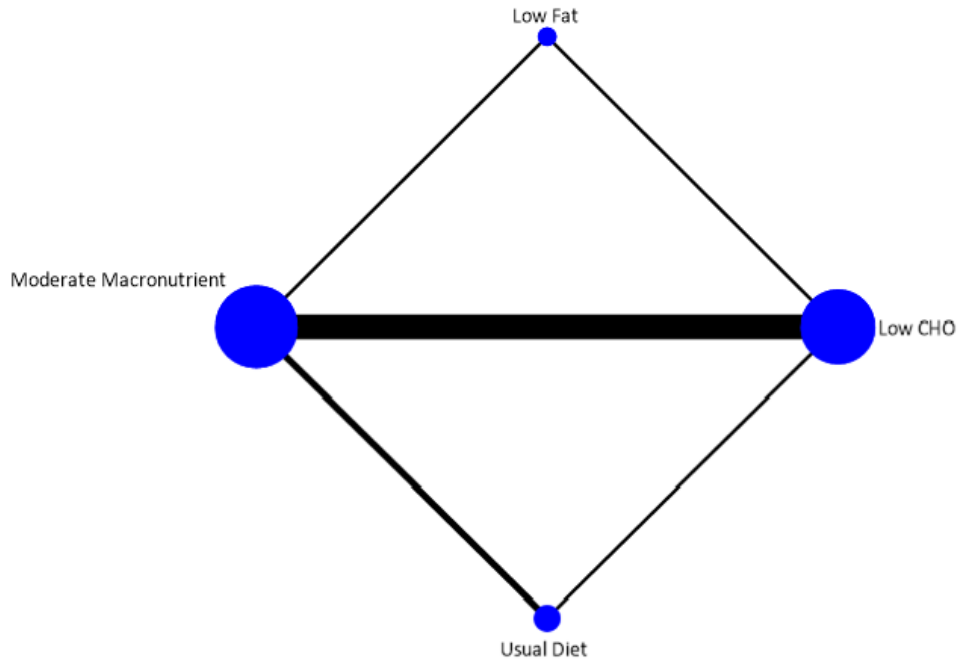

**Macronutrient composition NMA**

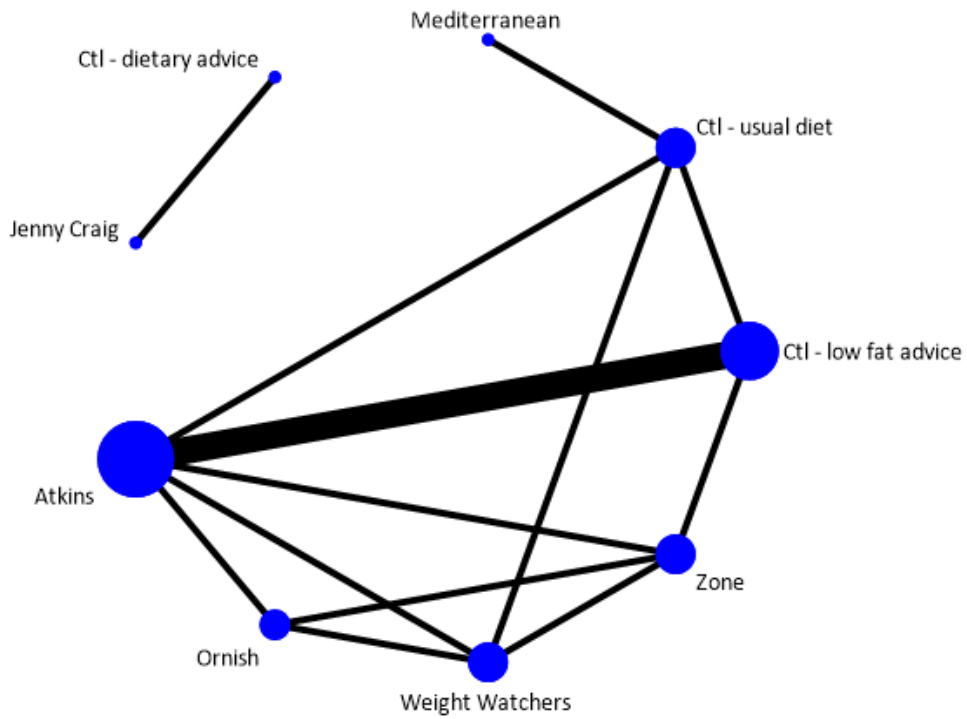

**Individual popular diets NMA**

Figure S7: SUCRA values (%) for all outcomes at 6 months follow-up in individual popular diets NMA

| Diets             | Weight loss | SBP   | DBP   | LDL   | HDL   | CRP   |
|-------------------|-------------|-------|-------|-------|-------|-------|
| South Beach       | 97.59       | NA    | NA    | 35.69 | 67.92 | NA    |
| Jenny Craig       | 92.32       | 83.96 | 97.81 | 36.13 | 25.54 | 47.68 |
| Atkins            | 77.96       | 74.07 | 75.96 | 14.84 | 93.47 | 68.07 |
| Volumetrics       | 75.66       | 43.38 | 47.71 | 69.67 | 64.61 | NA    |
| Paleolithic       | 69.84       | 99.11 | 71.84 | 68.79 | 36.59 | 58.21 |
| Zone              | 54.96       | 49.31 | 56.15 | 15.38 | 66.39 | 49.31 |
| Weight Watchers   | 51.11       | 37.49 | 31.6  | 41.85 | 56.87 | 72.36 |
| Rosemary Conley   | 48.21       | 37.36 | 39.86 | 71.2  | 40.22 | NA    |
| Low fat diet      | 47.65       | 55.73 | 53.99 | 48.06 | 33.03 | 50.64 |
| Portfolio         | 46.34       | 74.44 | 77.48 | 98.86 | 25.65 | 34.3  |
| Ornish            | 45.48       | 16.77 | 17.49 | 64.45 | 7.02  | 73.47 |
| DASH              | 44.82       | 67.56 | 67.03 | 59.22 | 38.65 | NA    |
| The Biggest Loser | 35.19       | 46.24 | 52.52 | 57.49 | 67.63 | NA    |
| Mediterranean     | 29.59       | 42.44 | 31.04 | 65.96 | 61.64 | 49.7  |
| Slimming World    | 24.31       | NA    | NA    | NA    | NA    | NA    |
| Dietary advice    | 5.9         | 13.83 | 18.52 | 19.35 | 41.31 | 8.82  |
| Usual diet        | 3.06        | 8.3   | 10.97 | 33.06 | 73.46 | 37.44 |
